# Supplementary material for: Identification of Genes Associated with Nitrogen Stress Responses in Apple Leaves
Source: MDPI journal article supplement (doi:10.3390/plants10122649), 2021-12-02
Supplement: s1 [file s1]

## Supporting Information Figure S1-S2

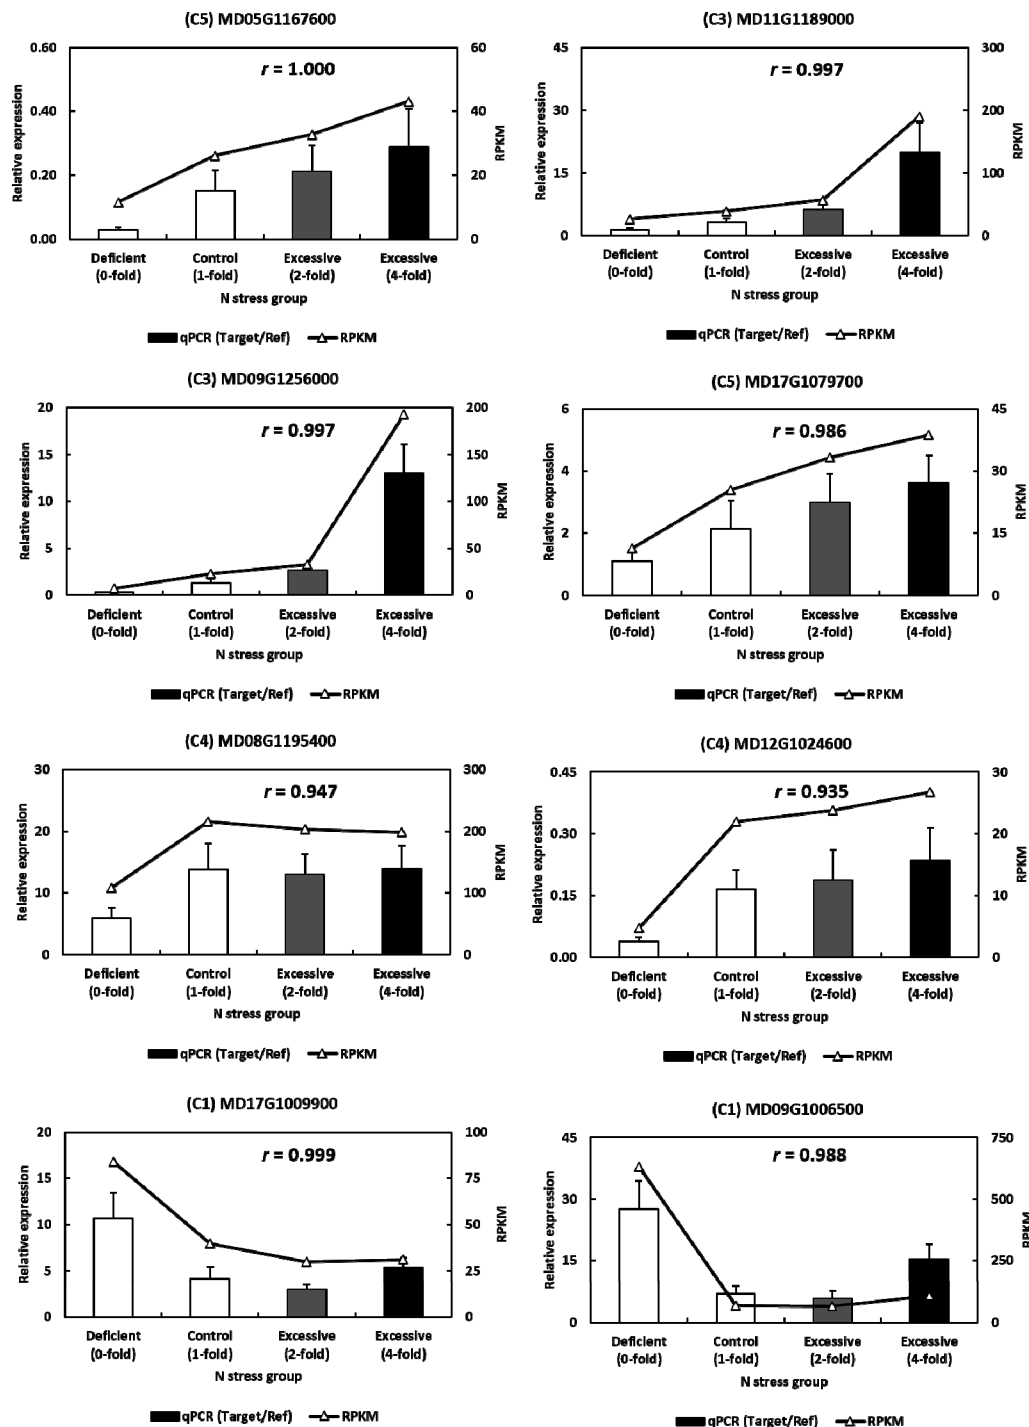

**Figure S1.** qPCR results for RNA-seq validation. RPKM data were compared with relative expression values in qPCR and the correlation coefficient  $r$  was obtained using a set of 8 selected genes.

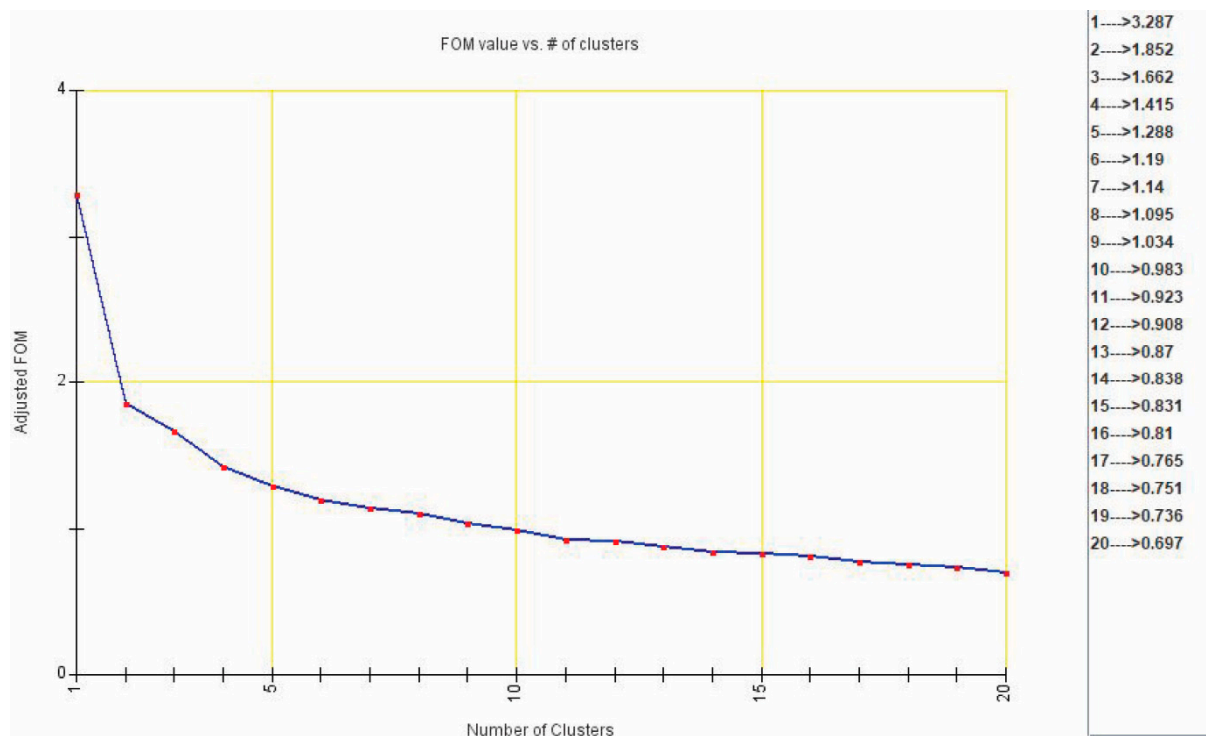

**Figure S2.** Figure of merit (FOM) analysis on 2,212 DEG dataset.
