# Supplementary material for: Identification of Genes Associated with Nitrogen Stress Responses in Apple Leaves
Source: Plants (Basel). 2021 Dec 2;10(12):2649. doi: 10.3390/plants10122649 (PMC8706881; doi:10.3390/plants10122649)
Supplement: Supplementary file 1 [file plants-10-02649-s001.zip › Supporting_TABLES_nitrogen_apple_proofreading_Plants-1474903_YL.xlsx]

## Sheet: Title
	SUPPRORTING TABLES
	Identification of genes associated with nitrogen stress responses in apple leaves
	Youngsuk Lee1‡*, Van Giap Do1‡, Seonae Kim1 and Hunjoong Kweon1
	1 Apple Research Institute, National Institute of Horticultural and Herbal Science, Rural Development Administration, 107, Soboangye-ro, Gunwi 39000, Korea
	‡ These authors are co-first authors on this work
	* corresponding author : terra1936@gmail.com

## Sheet: S1
	Table S1. Summary statistics of RNA-seq data
	Sample	Raw reads	Trimmed reads	Reads mapped in pairs	Reads mapped in broken pairs	Reads not mapped	Mapping percentage (%)
	N_deficient_0x_A2	51159324	49985608	45709998	2834342	1441268	91.4
	N_deficient_0x_A3	55440590	54112390	49600730	2983151	1528509	91.7
	N_deficient_0x_A4	63837894	62365912	57584706	3387370	1393836	92.3
	N_control_1x_B1	59143810	57724026	52972512	3291077	1460437	91.8
	N_control_1x_B2	56334876	55069498	50678404	2870516	1520578	92
	N_control_1x_B4	53041234	51821558	47718132	2713686	1389740	92.1
	N_excessive_2x_C1	46718590	45638600	42044952	2552729	1040919	92.1
	N_excessive_2x_C2	51508012	50377644	46676850	2550182	1150612	92.7
	N_excessive_2x_C4	49311088	48196188	44306828	2480751	1408609	91.9
	N_excessive_4x_D1	56370550	55129404	50715818	2867562	1546024	92
	N_excessive_4x_D2	53228480	51974566	48065044	2603628	1305894	92.5
	N_excessive_4x_D4	50390748	49198108	45434092	2411232	1352784	92.3

## Sheet: S2
	Table S2. Expression level (RPKM) of 45,116 apple genes in our transcriptome data
		Leaf samples
	Gene ID	N_deficient (0x) - Means	N_Control (1x) - Means	N_Excessive (2x) - Means	N_Excessive (4x) - Means
	MD00G1000100	0	0	0	0
	MD00G1000200	1.19	1.45667	1.69	1.78667
	MD00G1000300	0.04	0.04	0.03	0.06
	MD00G1000400	0	0	0	0
	MD00G1000500	0.0666667	0.05	0.06	0.1
	MD00G1000600	16.2567	22.4	29.1067	30.4633
	MD00G1000700	0.92	0.96	0.99	1.03333
	MD00G1000800	22.1833	20.4067	18.6633	15.6933
	MD00G1000900	0.0566667	0.0866667	0.0333333	0
	MD00G1001000	1.8	1.87	1.92	1.77333
	MD00G1001200	0.583333	0.593333	0.626667	0.506667
	MD00G1001300	0	0	0	0
	MD00G1001400	49.6	53.4133	47.7233	49.9467
	MD00G1001500	4.62333	4.59667	4.00333	4.14
	MD00G1001700	0	0	0	0
	MD00G1001800	7.16667	7.14	7.46	7.29
	MD00G1001900	10.3833	10.0667	12.1833	9.03667
	MD00G1002000	0.7	0.806667	0.746667	0.71
	MD00G1002100	74.7667	93.8367	129.293	100.55
	MD00G1002200	0	0.0266667	0.0633333	0.0566667
	MD00G1002500	0.0333333	0.03	0	0.03
	MD00G1002600	0.0133333	0.0166667	0	0.05
	MD00G1002700	0	0	0	0
	MD00G1003400	0	0.00333333	0	0.01
	MD00G1003500	0.493333	0.63	0.573333	0.466667
	MD00G1003600	0.0166667	0.01	0.02	0.0466667
	MD00G1003800	19.2	16.0567	17.29	21.82
	MD00G1003900	0.01	0	0	0.02
	MD00G1004000	0	0.01	0	0
	MD00G1004100	18.2933	15.29	15.56	14.7233
	MD00G1004200	4.96667	4.31667	5.41333	4.29333
	MD00G1004300	0.14	0.236667	0.28	0.403333
	MD00G1004400	0	0	0	0
	MD00G1004500	0	0	0	0
	MD00G1004600	0.406667	0.683333	0.136667	0.216667
	MD00G1004800	0	0	0	0
	MD00G1004900	4.62	7.47333	9.00667	8.95667
	MD00G1005000	1.01	1.14333	1.24	1.24667
	MD00G1005100	4.36	4.3	3.75333	4.61
	MD00G1005200	0	0	0	0
	MD00G1005300	11.4767	16.16	17.5867	17.8033
	MD00G1005400	0	0	0	0
	MD00G1005500	0.323333	0.18	0.21	0.136667
	MD00G1005600	0.116667	0.0366667	0.0266667	0.0533333
	MD00G1005700	19.0233	22.1967	41.6467	41.5533
	MD00G1005800	9.76333	9.23667	9.50333	8.30667
	MD00G1006000	11.1167	10.6133	8.99	8.8
	MD00G1006100	0.223333	0.123333	0.24	0.0866667
	MD00G1006200	0.813333	0.47	0.676667	0.836667
	MD00G1006400	0.06	0.0866667	0.12	0.05
	MD00G1006500	0.05	0.0866667	0.0433333	0.0966667
	MD00G1006600	0.0133333	0.0466667	0.0433333	0.05
	MD00G1006700	2.73333	2.99	2.57	3.21333
	MD00G1006800	0.866667	0.823333	0.413333	0.343333
	MD00G1006900	9.17333	8.68333	7.34333	8.49667
	MD00G1007000	0.46	0.413333	0.136667	0.116667
	MD00G1007100	11.3233	11.41	11.04	11.73
	MD00G1007200	1.01667	0.646667	0.606667	0.716667
	MD00G1007300	0	0	0	0
	MD00G1007400	0.0233333	0	0.06	0.0266667
	MD00G1007500	0.0633333	0	0	0.103333
	MD00G1007600	16.3433	13.0833	10.34	9.50333
	MD00G1007700	10.5967	7.45333	7.97333	7.78
	MD00G1007800	11.13	12.4	11.4267	12.6467
	MD00G1007900	0.143333	0.113333	0.0766667	0.113333
	MD00G1008000	0.0133333	0.02	0.0166667	0.0266667
	MD00G1008100	5.92	5.8	5.12667	6.38667
	MD00G1008200	0.703333	0.52	0.336667	0.476667
	MD00G1008300	0.03	0	0	0
	MD00G1008400	4.46	4.32	4.42667	4.49667
	MD00G1008500	0	0	0	0
	MD00G1008600	0.01	0	0.01	0.02
	MD00G1008700	18.2567	15.44	13.4733	14.3533
	MD00G1008800	0	0	0	0
	MD00G1008900	0	0	0	0
	MD00G1009000	5.79333	11.2633	16.3533	19.2033
	MD00G1009200	0.05	0.136667	0.106667	0.146667
	MD00G1009300	196.83	189.457	164.337	184.15
	MD00G1009400	0.12	0	0.02	0.02
	MD00G1009500	3.83	3.31667	3.83667	2.58
	MD00G1009600	0	0.01	0	0
	MD00G1009700	2.77667	2.72667	2.04667	2.47667
	MD00G1009800	5.30667	3.92333	3.17667	3.40333
	MD00G1009900	2.58	3.55333	3.74667	4.42
	MD00G1010000	8.14667	8.13333	7.43	9.34
	MD00G1010100	0	0	0	0
	MD00G1010200	0	0	0	0
	MD00G1010300	0	0	0	0
	MD00G1010400	0	0	0	0
	MD00G1010500	0	0	0	0
	MD00G1010600	0	0.173333	0	0.0633333
	MD00G1010700	0.246667	0.316667	0.183333	0.213333
	MD00G1010800	0	0	0	0
	MD00G1011000	0	0	0	0
	MD00G1011100	0	0.01	0	0.0166667
	MD00G1011200	0	0	0	0
	MD00G1011300	0.0233333	0	0.0266667	0
	MD00G1011400	0.0233333	0	0.0866667	0.0266667
	MD00G1011500	2.23	2.54	2.03667	2.30333
	MD00G1011600	0.573333	0.633333	0.99	0.796667
	MD00G1011700	1.05667	1.22333	1.05333	1.01
	MD00G1011900	13.8667	18.04	14.74	13.8467
	MD00G1012000	0	0	0	0
	MD00G1012100	0.15	0.203333	0.22	0.246667
	MD00G1012200	3.36667	2.36333	2.15	1.31667
	MD00G1012300	15.34	13.6667	13.62	12.58
	MD00G1012400	0.986667	0.77	0.7	0.873333
	MD00G1012500	0	0	0	0
	MD00G1012600	1.54333	1.46	1.26667	1.54333
	MD00G1012700	0	0	0	0
	MD00G1012800	0.02	0.00666667	0.0133333	0.02
	MD00G1012900	0.0666667	0.116667	0.11	0.21
	MD00G1013000	19.5133	16.0733	18.3133	25.0267
	MD00G1013300	3.88333	3.64	3.36333	3.22333
	MD00G1013500	2.53333	3.08333	3.96667	3.53
	MD00G1013600	0.54	0.333333	0.293333	0.386667
	MD00G1013700	0.0266667	0.00666667	0.01	0.02
	MD00G1013800	0.533333	0.5	0.433333	0.536667
	MD00G1013900	0.13	0.09	0.193333	0.133333
	MD00G1014000	1.15	1.28333	1.26667	1.30333
	MD00G1014100	0.0866667	0.0833333	0.0666667	0.03
	MD00G1014200	0.186667	0.176667	0.143333	0.106667
	MD00G1014300	4.38	20.2533	23.81	37.88
	MD00G1014800	0	0	0	0
	MD00G1014900	0.02	0.03	0.0233333	0.04
	MD00G1015000	0	0	0	0
	MD00G1015100	0	0	0	0
	MD00G1015500	3.48667	2.90333	2.61	1.5
	MD00G1015600	2.86	6.69333	8.45	9.31667
	MD00G1015700	2.46333	6.09	7.59333	9.27
	MD00G1015800	0.556667	4.06	7.25	13.01
	MD00G1016200	0	0.0133333	0	0.0166667
	MD00G1016400	5.94667	4.55667	4.08667	4.39667
	MD00G1016500	0	0	0	0
	MD00G1016600	0	0	0	0
	MD00G1016700	27.63	22.5033	16.4833	17.5867
	MD00G1016800	16.2667	18.86	20.6167	19.62
	MD00G1016900	0	0	0	0
	MD00G1017000	10.47	9.37333	8.34667	9.02333
	MD00G1017100	15.03	12.7767	13.0167	13.5567
	MD00G1017200	0.216667	0.116667	0.266667	0.256667
	MD00G1017300	92.88	71.2967	69.97	67.39
	MD00G1017400	4.64667	4.78333	4.33	4.5
	MD00G1017500	0	0	0	0
	MD00G1017600	0	0	0	0
	MD00G1017700	0.12	0.0933333	0.223333	0.0966667
	MD00G1017800	0.0733333	0.0166667	0	0.0366667
	MD00G1018100	1.20667	1.63333	2.01333	0.936667
	MD00G1018200	0	0	0	0.0333333
	MD00G1018300	0	0	0	0
	MD00G1018400	5.94333	10.61	7.93	6.41333
	MD00G1018600	57.1933	52.9733	61.1733	50.3867
	MD00G1018700	0.07	0.0866667	0.0466667	0.0133333
	MD00G1018800	0	0	0	0
	MD00G1018900	42.7033	41.5267	56.8333	43.8433
	MD00G1019100	4.34667	4.38333	5.36333	4.84
	MD00G1019200	39.11	44.8033	52.95	47.1733
	MD00G1019700	49.6933	50.3633	43.31	47.34
	MD00G1019800	0	0	0	0
	MD00G1019900	0	0	0	0
	MD00G1020000	0.713333	1.15667	0.686667	1
	MD00G1020100	1.20667	1.77	1.60333	2
	MD00G1020200	1.30667	1.68333	2.32333	1.42667
	MD00G1020300	2.41	2.72333	2.00667	2.27333
	MD00G1020400	1.77333	1.96	1.94667	1.61
	MD00G1020500	0.24	0.173333	0.196667	0.233333
	MD00G1020600	6.22	5.45	5.39	5.64
	MD00G1020700	3.22	3.43	2.03667	2.66333
	MD00G1021100	0.746667	1.41	0.833333	1.20667
	MD00G1021200	0.27	0.52	0.243333	0.37
	MD00G1021300	0	0.03	0	0.0633333
	MD00G1021400	1.23667	2.09333	2	2.14667
	MD00G1021500	0.866667	1.7	1.61333	1.83667
	MD00G1021600	0.743333	0.806667	0.92	1.47667
	MD00G1021700	0.516667	0.886667	0.616667	1.21333
	MD00G1021800	2.18667	3.43	4.17	3.65333
	MD00G1021900	0.0333333	0	0.0333333	0
	MD00G1022000	1.32333	1.18667	1.11	0.776667
	MD00G1022100	1.66333	1.29667	1.20667	1.18333
	MD00G1022200	69.8033	69.97	81.9867	66.7267
	MD00G1022400	1.41	1.94333	2.32667	2.67
	MD00G1022500	0	0	0	0
	MD00G1022600	0	0	0	0
	MD00G1022700	0.0866667	0.0533333	0.126667	0.09
	MD00G1022900	28.2433	25.2967	22.6267	20.3167
	MD00G1023000	1.81	1.05667	1.10333	0.656667
	MD00G1023100	0	0	0	0
	MD00G1023300	5.38	7.03333	4.48	6.35333
	MD00G1023400	1.91333	2.60667	1.56	2.36667
	MD00G1023500	26.2767	28.8233	29.1067	27.4367
	MD00G1023600	88.2933	99.4433	71.8033	86.6233
	MD00G1023700	5.88667	6.01	4.99333	4.76667
	MD00G1023800	0	0	0	0
	MD00G1024000	1.10667	1.22333	0.703333	1.30667
	MD00G1024100	2.8	3.43333	2.61	2.83333
	MD00G1024200	3.74333	3.98333	2.52	3.5
	MD00G1024300	1.66	1.65	1.36667	1.69667
	MD00G1024400	4.8	4.90667	2.31	3.69
	MD00G1024500	9.32	9.78667	6.18667	7.58
	MD00G1024600	0.00284667	0	0	0
	MD00G1024700	0.0466667	0.0233333	0.0533333	0.0366667
	MD00G1024800	252.75	229.157	173.807	155.513
	MD00G1024900	5	5.44667	4.02	4.59667
	MD00G1025200	40.6067	44.9567	37.94	48.23
	MD00G1025500	33.6933	29.4967	27.2567	30.4233
	MD00G1025600	10.3567	10.99	13.6533	10.69
	MD00G1025700	14.0333	15.7967	18.5367	14.9833
	MD00G1025800	7.76333	5.81	5.46	4.66333
	MD00G1025900	4.08333	3.35	2.96	2.85
	MD00G1026000	2.16333	1.87	1.31333	2.11667
	MD00G1026100	1.84667	1.67	1.17333	1.78667
	MD00G1026200	0.09	0.0933333	0.1	0.146667
	MD00G1026300	0.383333	0.453333	0.543333	0.313333
	MD00G1026400	0.0566667	0.0766667	0.153333	0.0366667
	MD00G1026500	0.0133333	0.0333333	0.0366667	0.0333333
	MD00G1026600	0	0	0.0533333	0.05
	MD00G1026700	1.03333	1.24	0.716667	0.606667
	MD00G1026800	2.59	2.42667	2.36667	2.46333
	MD00G1026900	0	0	0	0
	MD00G1027000	0	0.00666667	0.00666667	0.00666667
	MD00G1027100	0.146667	0.143333	0.05	0.146667
	MD00G1027200	0.0133333	0.0133333	0.01	0.0266667
	MD00G1027300	0.03	0	0	0.0366667
	MD00G1027600	0	0	0	0
	MD00G1027700	0.0533333	0.04	0.05	0.0533333
	MD00G1027800	0.356667	0.206667	0.3	0.313333
	MD00G1027900	0.266667	0.413333	0.283333	0.436667
	MD00G1028000	0.47	0.5	0.46	0.57
	MD00G1028200	1.06667	1.07	0.6	0.883333
	MD00G1028300	0	0	0	0
	MD00G1028400	39.6	35.4033	36.67	31.4
	MD00G1028500	0.0166667	0	0	0
	MD00G1028600	0	0	0	0
	MD00G1028700	5.97	6.48667	4.38333	6.11333
	MD00G1028800	9.59333	9.73333	10.8467	9.97
	MD00G1028900	0.85	0.69	0.793333	0.91
	MD00G1029000	0	0	0	0
	MD00G1029100	35.5233	30.77	32.08	27.21
	MD00G1029200	0.616667	1.08	1.29	1.32
	MD00G1029300	61.24	68.6533	69.9333	79.93
	MD00G1029400	0.0466667	0.213333	0.31	0.116667
	MD00G1029500	8.81667	8.58667	4.80333	7.32
	MD00G1030000	7.34	6.9	5.96	6.35
	MD00G1030300	0	0	0	0
	MD00G1030400	2.23667	1.65667	1.51333	1.57333
	MD00G1030500	5.48667	5.93667	6.41333	6.62667
	MD00G1030600	2.41667	2.16667	1.72667	2.03
	MD00G1031100	13.95	11.9567	7.89667	9.05333
	MD00G1031200	18.5	15.44	17.2233	18.1667
	MD00G1031300	1.55	0.97	0.93	1.02667
	MD00G1031500	0.0766667	0.0566667	0.14	0.05
	MD00G1031600	15.4967	15.83	13.2767	13.9533
	MD00G1031700	28.4933	24.47	20.6967	23.0567
	MD00G1031800	0	0	0	0
	MD00G1031900	5.52	5.33667	4.93333	4.29
	MD00G1032200	2.96	2.62333	2.91333	3.29
	MD00G1032300	8.5	8.93333	9.63667	9.49
	MD00G1032400	6.65	12.7867	18.3767	19.6533
	MD00G1032500	4.84	3.91667	3.55333	4.52
	MD00G1032600	0.06	0.0266667	0.01	0.0366667
	MD00G1032700	8.12333	8.47333	9.37	8.82
	MD00G1033000	2.16667	2.22	1.49333	2.11
	MD00G1033100	1.99333	2.09667	2.59	1.99667
	MD00G1033200	0.31	4.61333	5.6	9.76
	MD00G1033400	0.03	0.12	0.0466667	0.0933333
	MD00G1033500	2.60667	2.93667	2.57333	2.30667
	MD00G1033600	43.1233	42.73	39.1767	43.9933
	MD00G1033700	0	0	0	0
	MD00G1033800	0	0	0	0
	MD00G1033900	0.126667	0.04	0.136667	0.116667
	MD00G1034000	2.47667	2.15667	2.19333	1.97667
	MD00G1034100	0	0	0	0
	MD00G1034500	40.32	44.4567	44.0567	41.29
	MD00G1034600	0.0366667	0.0333333	0.0433333	0.0266667
	MD00G1034700	0.0866667	0	0	0
	MD00G1034800	0.316667	0.246667	0.193333	0.183333
	MD00G1034900	0	0	0	0
	MD00G1035000	51.0233	49.4633	38.21	34.59
	MD00G1035100	0	0	0	0
	MD00G1035200	0.326667	0.23	0.173333	0.103333
	MD00G1035300	0	0	0	0
	MD00G1035400	4.14667	4.35	4.53667	3.94
	MD00G1035500	0	0	0	0
	MD00G1035800	0.24	0.603333	1.32	1.63333
	MD00G1035900	45.9767	52.1733	61.5233	54.76
	MD00G1036000	0	0	0	0
	MD00G1036100	0.276667	0.146667	0.0766667	0.0633333
	MD00G1036200	0	0	0	0
	MD00G1036300	0.446667	0.49	0.71	0.786667
	MD00G1036600	36.12	42.26	45.4867	42.4067
	MD00G1036700	0	0	0	0
	MD00G1036800	0	0	0	0
	MD00G1036900	0	0	0	0
	MD00G1037000	8.19	8	10.3333	7.72
	MD00G1037100	1.04667	1.31333	1.16	5.38667
	MD00G1037200	2.21	2.91667	3.25333	2.05667
	MD00G1037300	16.2533	17.8267	16.6467	16.88
	MD00G1037400	0	0	0	0
	MD00G1037500	60.65	106.94	110.15	120.663
	MD00G1037600	0.0166667	0.02	0	0.0633333
	MD00G1037700	0.07	0.1	0.05	0.09
	MD00G1038100	0	0	0	0
	MD00G1038200	1.65	1.11333	1.74333	1.54667
	MD00G1038300	0.646667	0.236667	0.356667	0.306667
	MD00G1038400	13.36	7.52667	5.37	7.54333
	MD00G1038500	9.48	8.77333	10.6467	11.1567
	MD00G1038600	0	0	0	0
	MD00G1038700	6.84	3.29667	2.16	2.53667
	MD00G1038800	2.49	2.11333	2.91667	3.35333
	MD00G1038900	12.5367	10.1867	8.93667	8.95
	MD00G1039200	1.17667	1.62667	1.73	1.71333
	MD00G1039300	0.753333	0.803333	0.833333	0.923333
	MD00G1039400	0	0	0.01	0
	MD00G1039500	6.79	6.26	6.50333	5.42667
	MD00G1039600	1.15667	1.00667	0.8	0.706667
	MD00G1039900	1.91	1.79	1.93333	1.43333
	MD00G1040000	1795.37	2026.64	2146.86	2360.6
	MD00G1040100	0.26	0.306667	0.62	0.356667
	MD00G1040200	7.11	6.30667	7.97	6.04
	MD00G1040300	0	0	0	0
	MD00G1040400	0	0	0	0
	MD00G1040500	12.26	10.2733	7.88667	10.25
	MD00G1040600	4.59667	3.64667	3.74	2.78667
	MD00G1040900	258.677	259.573	238.613	270.993
	MD00G1041000	0	0	0	0
	MD00G1041100	1.20333	1.36667	1.42667	1.45333
	MD00G1041200	4.96333	4.92	5.14667	4.90667
	MD00G1041300	0.563333	0.923333	0.806667	0.9
	MD00G1041400	14.6033	11.7833	17.6667	16.2
	MD00G1041800	0	0	0	0
	MD00G1041900	14.3933	13.3533	11	12.74
	MD00G1042000	0	0	0	0
	MD00G1043300	4.94667	5.3	4.51667	5.41667
	MD00G1043400	0	0.09	0.25	0.123333
	MD00G1043500	2.65	1.75333	2.38333	2.14667
	MD00G1043700	8.13333	7.84333	7.87333	7.52
	MD00G1043800	0.00666667	0.00666667	0.02	0.01
	MD00G1043900	0	0	0	0
	MD00G1044000	0	0	0	0
	MD00G1044100	0	0	0	0
	MD00G1044200	0.0833333	0.0833333	0.12	0.12
	MD00G1044300	0	0	0	0
	MD00G1044400	0	0	0	0
	MD00G1044500	32.4733	31.0567	34.33	25.72
	MD00G1044800	0	0	0	0
	MD00G1044900	0	0	0	0
	MD00G1045000	0	0	0	0
	MD00G1045100	0	0	0	0
	MD00G1045200	8.04333	8.10667	6.95333	8.00333
	MD00G1045300	32.9033	29.0733	27.7167	30.67
	MD00G1045400	0.0966667	0.0966667	0	0.03
	MD00G1045500	0	0	0.0133333	0
	MD00G1045600	0	0	0	0
	MD00G1045700	0.406667	0.19	0.213333	0.383333
	MD00G1045800	0.0133333	0	0.0133333	0
	MD00G1045900	0.82	0.863333	0.7	0.82
	MD00G1046000	0	0.0266667	0.09	0.0566667
	MD00G1046200	0	0	0	0
	MD00G1046300	3.56333	3.81333	2.71333	3.24667
	MD00G1046400	2.19667	3.10667	1.67	2.75
	MD00G1046500	2.92333	3.49333	2.31667	2.8
	MD00G1046600	0	0	0	0
	MD00G1046700	18.3533	21.2467	13.1467	18.4833
	MD00G1046800	4.48667	5.39333	3.85333	3.50667
	MD00G1047000	0	0	0	0
	MD00G1047100	1.74333	1.94667	1.37667	2.09667
	MD00G1047200	0.0433333	0.0266667	0.03	0.0433333
	MD00G1047300	0	0	0	0
	MD00G1047400	19.7333	24.6333	16.5667	20.87
	MD00G1047500	0.613333	0.69	0.613333	0.71
	MD00G1047600	0.04	0.166667	0.07	0.11
	MD00G1047900	9.85667	9.32333	7.91333	8.89333
	MD00G1048000	0	0.06	0.0666667	0
	MD00G1048100	0.03	0.02	0.0266667	0.04
	MD00G1048200	2.96667	2.61	2.13333	2.26333
	MD00G1048300	0.0466667	0.0766667	0.0866667	0.126667
	MD00G1048400	4.33333	4.74	3.31333	4.85
	MD00G1048600	0	0	0.223333	0
	MD00G1048700	0	0	0	0
	MD00G1048800	1.08333	1.23	0.87	1.09667
	MD00G1048900	3.09333	2.88667	3.01667	2.82667
	MD00G1049000	44.1933	37.5967	37.7333	33.5567
	MD00G1049100	0.17	0.2	0.16	0.183333
	MD00G1049200	0.0166667	0.0266667	0.0933333	0.133333
	MD00G1049400	0	0	0	0
	MD00G1049500	0	0	0	0
	MD00G1049600	0	0	0	0
	MD00G1049700	0	0	0	0
	MD00G1049800	0	0	0	0
	MD00G1050100	9.40667	10.5867	9.48	10.08
	MD00G1050200	0.0766667	0.0466667	0.04	0.0833333
	MD00G1050300	0.09	0.0966667	0.0733333	0.05
	MD00G1050400	0.06	0.0666667	0.0333333	0.0566667
	MD00G1050500	3.53667	2.81667	2.63	2.33333
	MD00G1050600	4.68	4.95333	4.45667	5.55
	MD00G1050700	31.39	29.3667	24.5033	29.8433
	MD00G1050800	0	0	0	0
	MD00G1051000	0	0	0	0
	MD00G1051100	55.9	73.9433	127.39	92.5167
	MD00G1051200	9.81333	8.32667	7.51667	8.31667
	MD00G1051300	17.1567	15.2933	12.4333	13.5033
	MD00G1051400	10.9633	9.77	8.48	9.78667
	MD00G1051500	40.8433	35.9167	46.7733	20.3367
	MD00G1051600	0	0	0	0
	MD00G1051700	0	0	0	0
	MD00G1051800	14.17	12.3967	12.7433	11.12
	MD00G1051900	0	0	0	0
	MD00G1052000	8.51667	13.3	25.15	17.4533
	MD00G1052100	8.94667	7.43333	6.63667	7.12667
	MD00G1052200	4.69333	3.95333	4.45333	3.89667
	MD00G1052300	0.0666667	0.0466667	0	0.0766667
	MD00G1052400	0	0	0	0
	MD00G1052500	0	0	0	0
	MD00G1052600	0	0	0	0
	MD00G1052700	7.43667	7.20667	8.26	7.23667
	MD00G1052800	0	0	0	0
	MD00G1052900	1.70333	0.6	0.63	0.486667
	MD00G1053000	0	0	0	0
	MD00G1053100	0.356667	0.426667	0.216667	0.146667
	MD00G1053300	7.74333	7.29	5.48	5.87667
	MD00G1053500	0.116667	0.07	0	0.05
	MD00G1053600	0.0833333	0.14	0.05	0.31
	MD00G1053700	24.81	22.63	19.1733	20.7633
	MD00G1053800	0	0	0	0
	MD00G1053900	4.47333	3.68667	3.49	3.23333
	MD00G1054000	0	0	0	0
	MD00G1054100	3.62	3.24667	2.6	2.8
	MD00G1054200	0.25	0.15	0.183333	0.173333
	MD00G1054300	0	0.133333	0.0766667	0.363333
	MD00G1054400	0.383333	0.706667	0.643333	0.82
	MD00G1054500	4.15333	3.22667	3.27333	3.52333
	MD00G1054600	0	0	0	0
	MD00G1055100	0.0266667	0.1	0.06	0.0766667
	MD00G1055200	21.8733	20.2967	19.89	17.5967
	MD00G1055300	19.7033	18.63	18.31	17.55
	MD00G1055400	1.88333	1.6	1.97667	1.62
	MD00G1055600	16.3467	17.38	14.0133	15.0367
	MD00G1055800	11.2067	9.81667	8.13667	8.55
	MD00G1056000	127.517	108.843	100.6	106.04
	MD00G1056100	20.1167	18.34	17.4233	15.3867
	MD00G1056200	0	0	0	0
	MD00G1056300	0.41	0.296667	0.27	0.28
	MD00G1056400	1.96	2.81333	3.44333	3.84
	MD00G1056500	4.37	4.83667	5.78333	4.81333
	MD00G1056700	1.63667	1.77	1.35667	1.61
	MD00G1056800	0.51	0.57	0.496667	0.493333
	MD00G1056900	0.0433333	0.05	0.106667	0.106667
	MD00G1057000	0.18	0.126667	0.203333	0.2
	MD00G1057100	0.9	0.86	0.836667	0.843333
	MD00G1057200	0.91	0.323333	0.303333	0.103333
	MD00G1057300	0.42	0.25	0.0933333	0.17
	MD00G1057400	6.37	6.54333	7.72333	7.39667
	MD00G1057500	0.85	0.656667	0.67	0.65
	MD00G1057600	0.78	0.69	1.57	1.30667
	MD00G1057700	32.9933	45.5433	52.77	52.21
	MD00G1057800	4.32333	4.36667	3.51333	3.25667
	MD00G1057900	12.5133	11.2967	10.6433	9.43333
	MD00G1058000	0.983333	0.743333	0.8	0.82
	MD00G1058100	0.08	0.0166667	0.113333	0.0366667
	MD00G1058200	0	0	0	0
	MD00G1058300	1.04	1.34	0.846667	0.843333
	MD00G1058400	0	0	0	0
	MD00G1058500	12.2	11.8367	10.57	10.14
	MD00G1058600	12.8567	15.8733	19.62	13.5367
	MD00G1058700	1.2	1.39	1.20333	1.29333
	MD00G1058800	0.02	0	0	0
	MD00G1058900	3.62667	3.34667	4.56	3.58667
	MD00G1059000	10.02	10.1833	10.65	8.33333
	MD00G1059100	56.9333	45.8567	41.94	33.58
	MD00G1059200	10.43	11.1733	11.44	9.82667
	MD00G1059300	0	0	0	0
	MD00G1059400	0	0	0	0
	MD00G1059700	0	0	0	0
	MD00G1059800	0	0	0	0
	MD00G1059900	0	0	0	0
	MD00G1060000	0.263333	0.346667	0.16	0.33
	MD00G1060100	27.1	26.0767	20.8867	24.8633
	MD00G1060200	0.0133333	0.0466667	0.07	0.07
	MD00G1060300	16.8367	19.2533	22.8067	20.2067
	MD00G1060400	2.47667	2.85	3.19333	3.55333
	MD00G1060500	0.21	0.07	0.0366667	0
	MD00G1060600	0.02	0.113333	0.106667	0.02
	MD00G1060700	4.13	3.69	2.96667	3.17667
	MD00G1060800	0.01	0.02	0.05	0.0133333
	MD00G1060900	18.2467	17.06	14.86	14.8233
	MD00G1061000	0	0	0	0
	MD00G1061100	0.0266667	0.0766667	0.0733333	0.276667
	MD00G1061200	0.00326	0.00333333	0.01	0
	MD00G1061600	0.856667	0.9	1.05667	0.926667
	MD00G1061700	4.23667	8.55	9.78333	14.46
	MD00G1061800	69.21	78.14	86.4067	94.8267
	MD00G1061900	0	0.0266667	0	0.0266667
	MD00G1062000	0	0	0	0
	MD00G1062100	2.51667	1.89333	1.95667	1.79333
	MD00G1062200	16.3333	18.1667	21.65	21.95
	MD00G1062300	0.11	0.133333	0.123333	0.146667
	MD00G1062400	0	0	0	0
	MD00G1062600	0	0	0	0
	MD00G1062700	0	0	0	0
	MD00G1062800	0.416667	0.43	0.323333	0.32
	MD00G1062900	0.143333	0.193333	0.143333	0.11
	MD00G1063000	0.0533333	0.0266667	0.00333333	0.0166667
	MD00G1063200	0.0933333	0.0966667	0.113333	0.256667
	MD00G1063300	0	0	0	0
	MD00G1063400	11.7867	10.23	9.71333	10.0267
	MD00G1063500	0.236667	0.126667	0.16	0.153333
	MD00G1063600	0.0233333	0.106667	0	0.0233333
	MD00G1063700	0	0	0	0
	MD00G1063900	6.84333	5.78	5.31333	5.18667
	MD00G1064000	4.10333	2.91333	2.56333	2.52
	MD00G1064100	6.78	5.99	5.67667	5.74333
	MD00G1064200	3.68333	3.69333	2.73	3.07667
	MD00G1064300	0	0	0	0
	MD00G1064400	22.5333	29.54	32.3167	31.1133
	MD00G1064500	0	0	0	0
	MD00G1064600	0.11	0.0266667	0	0.02
	MD00G1064700	42.44	39.6867	38.1733	38.54
	MD00G1064800	11.7567	12.2833	16.1033	15.55
	MD00G1065000	0.03	0.0566667	0.01	0.0166667
	MD00G1065100	0	0	0.0533333	0.0533333
	MD00G1065200	0	0	0	0
	MD00G1065300	62.9567	59.5167	63.7867	65.29
	MD00G1065500	0.0966667	0.156667	0.143333	0.243333
	MD00G1065600	0	0	0	0
	MD00G1065700	0	0	0	0
	MD00G1065900	0	0	0	0
	MD00G1066000	0.0133333	0	0	0.0133333
	MD00G1066100	0	0	0	0.0466667
	MD00G1066200	0.24	0.513333	0.396667	0.373333
	MD00G1066300	1.71	1.96667	1.46667	2.05
	MD00G1066600	6.41	6.12667	5.23333	4.61333
	MD00G1066700	7.54667	9.39333	12.4033	7.87667
	MD00G1066800	10.65	13.8567	13.96	14.7233
	MD00G1067000	0	0	0	0
	MD00G1067100	0	0	0	0
	MD00G1067200	0.743333	0.963333	1.44	1.25333
	MD00G1067300	19.9533	15.0067	12.2733	12.9333
	MD00G1067400	0	0.02	0	0.01
	MD00G1067500	19.5267	18.3167	22.86	17.8433
	MD00G1067600	0	0	0	0
	MD00G1067700	0	0	0	0
	MD00G1067800	0.176667	0.0966667	0.33	0.303333
	MD00G1067900	0.113333	0.17	0.236667	0.203333
	MD00G1068000	0.296667	0.38	0.553333	0.613333
	MD00G1068100	0	0	0	0
	MD00G1068300	20.9433	19.4467	16.13	18.22
	MD00G1068500	520.9	614.933	663.697	726.45
	MD00G1068600	20.44	22.5367	24.16	21.4733
	MD00G1068700	9.57333	9.25333	9.19	8.28333
	MD00G1068800	8.90667	5.80667	5.56333	4.98
	MD00G1069300	0	0	0	0
	MD00G1069500	0	0	0	0
	MD00G1069800	27.18	19.8267	16.3967	10.07
	MD00G1069900	16.3467	18.2233	22.8	19.51
	MD00G1070000	51.2067	71.7333	65.39	68.0933
	MD00G1070100	0.646667	0.826667	1.12333	1.03333
	MD00G1070400	20.3233	19.54	18.43	20.5533
	MD00G1070500	0	0	0	0
	MD00G1070600	0	0	0	0
	MD00G1070700	3.49333	3.68667	4.63	4.23333
	MD00G1070800	0.03	0.0266667	0.00666667	0
	MD00G1071000	42.15	44.29	41.1267	60.35
	MD00G1071100	3.30667	3.82667	3.69667	3.69667
	MD00G1071200	59.93	70.9967	71.3933	63.7867
	MD00G1071300	8.56	6.87333	5.03667	5.08667
	MD00G1071500	0	0	0	0
	MD00G1071600	0	0	0	0
	MD00G1071700	0	0.0133333	0.0133333	0
	MD00G1071800	0.38	0.55	0.65	0.663333
	MD00G1071900	5.20667	4.63667	4.77333	4.65667
	MD00G1072100	0.0666667	0.03	0.0633333	0.106667
	MD00G1072200	3.30667	2.75333	2.72333	2.33667
	MD00G1072300	17.1767	14.9167	9.62667	12.06
	MD00G1072400	0	0	0	0
	MD00G1072500	9.21333	4.34667	4.4	4.72333
	MD00G1072600	0	0.0166667	0.0166667	0
	MD00G1072700	1.49667	1.53	0.9	1.16667
	MD00G1072800	0.163333	0.17	0.0833333	0.0766667
	MD00G1072900	0.0433333	0.0233333	0	0
	MD00G1073000	0	0	0.04	0
	MD00G1073100	0	0	0	0
	MD00G1073200	45.9067	38.3833	45.95	43.6267
	MD00G1073300	1.55	1.68	1.41	1.68667
	MD00G1073400	53.7	34.7233	28.7667	23.9133
	MD00G1073500	0	0	0	0
	MD00G1073700	0	0	0	0
	MD00G1073900	0.513333	0.433333	0.836667	0.2
	MD00G1074000	32.2333	30.06	26.43	30.65
	MD00G1074100	15.4067	15.54	18.5567	14.44
	MD00G1074600	0	0	0	0
	MD00G1074700	0	0	0	0
	MD00G1075000	0.01	0.05	0.0733333	0.133333
	MD00G1075100	1.68667	2.00333	1.95333	1.99
	MD00G1075200	0	0.02	0.0466667	0.0333333
	MD00G1075300	9.04667	7.50333	7.30333	6.09
	MD00G1075400	45.6933	36.8267	33.44	36.0867
	MD00G1075500	25.0433	25.5533	28.3933	21.1533
	MD00G1075600	0	0	0.0433333	0
	MD00G1075700	149.63	157.563	161.143	170.813
	MD00G1075800	10.2067	9.79	9.13	9.63
	MD00G1076000	0.54	0.446667	0.39	0.373333
	MD00G1076100	0.94	0.95	0.706667	0.68
	MD00G1076200	0.3	0.283333	0.23	0.306667
	MD00G1076300	29.9967	30.9033	26.6367	32.7867
	MD00G1076400	14.61	16.1533	15.0433	17.7867
	MD00G1076500	0	0	0	0
	MD00G1076700	2.35667	2.52333	2.72667	3.29333
	MD00G1076800	25.5867	30.3033	31.9533	27.0433
	MD00G1076900	0	0.02	0	0
	MD00G1077000	7.32	7.60667	8.51	8.54
	MD00G1077100	0	0	0	0
	MD00G1077200	0	0	0	0
	MD00G1077300	2.18333	1.4	1.48	1.55667
	MD00G1077400	18.22	10.45	8.98667	9.44333
	MD00G1077500	0	0	0	0
	MD00G1077600	0.343333	0.52	0.55	0.326667
	MD00G1077700	0.06	0	0.0666667	0
	MD00G1077800	10.0067	8.30333	7.98333	10.15
	MD00G1077900	1.82667	1.54333	1.86333	1.68667
	MD00G1078000	2.96333	3.80333	2.33667	3.78333
	MD00G1078100	6.76667	8.21333	6.43667	7.75667
	MD00G1078200	1.06	0.57	0.85	0.486667
	MD00G1078300	9.93	8.69333	7.37667	7.63
	MD00G1078400	9.29333	8.83	7.76333	9.33
	MD00G1078500	6.10333	6.14333	4.25	4.87333
	MD00G1078600	55.45	54.7	67.37	60.4567
	MD00G1078900	10.32	9.97333	9.1	8.41333
	MD00G1079100	1.51333	1.31	0.976667	0.95
	MD00G1079200	4.07333	4.64333	3.94667	3.64
	MD00G1079300	1.78	1.82	1.77	1.80667
	MD00G1079400	0.226667	0.16	0.173333	0.133333
	MD00G1079500	0.106667	0.173333	0.2	0.286667
	MD00G1079600	0	0	0	0
	MD00G1079700	0	0	0	0
	MD00G1079900	1.73667	1.85	2.31667	1.92333
	MD00G1080000	0.403333	0.343333	0.316667	0.333333
	MD00G1080100	0	0	0	0
	MD00G1080200	0	0	0	0
	MD00G1080300	0.28	0.22	0.353333	0.323333
	MD00G1080400	6.10333	6.13333	3.98	5.18333
	MD00G1080500	0	0	0	0
	MD00G1080600	0	0	0	0
	MD00G1080700	38.0367	37.4567	35.78	34.93
	MD00G1080800	86.78	56.1067	45.8233	49.66
	MD00G1080900	0.38	0.326667	0.416667	0.393333
	MD00G1081000	0	0	0	0
	MD00G1081100	0	0	0.03	0
	MD00G1081200	0	0	0	0
	MD00G1081300	0	0.01	0.00666667	0.02
	MD00G1081400	0.0566667	0.0133333	0.0266667	0.0233333
	MD00G1081500	0.396667	0.153333	0.143333	0.0666667
	MD00G1081600	16.6533	17.0633	23.31	18.8367
	MD00G1081700	0	0	0	0
	MD00G1081800	0	0	0	0
	MD00G1081900	0	0	0	0
	MD00G1082000	54.5	45.1267	50.2667	28.84
	MD00G1082100	3.88333	2.90333	2.18333	2.57667
	MD00G1082200	0.1	0.0466667	0.0533333	0.0133333
	MD00G1082300	4.86	2.63333	2.49333	2.77333
	MD00G1082400	0	0.00666667	0	0.0133333
	MD00G1082500	0	0.01	0	0
	MD00G1082600	0	0	0	0
	MD00G1082700	0	0	0	0
	MD00G1082800	0	0	0	0
	MD00G1082900	0	0.00666667	0	0
	MD00G1083000	1.11667	1.19667	1.41333	1.82333
	MD00G1083100	9.97333	8.76667	7.83333	6.49
	MD00G1083200	0.0433333	0.0133333	0	0.03
	MD00G1083300	0	0	0	0
	MD00G1083400	0	0	0	0
	MD00G1083500	0	0	0	0
	MD00G1083600	0	0	0.0266667	0
	MD00G1083700	6.61667	6.26	5.94	5.89667
	MD00G1083800	0.493333	0.71	0.763333	0.993333
	MD00G1083900	9.05	8.95667	9.35667	9.52333
	MD00G1084000	3.94667	4.04	3.67667	3.56
	MD00G1084200	0.513333	0.76	0.63	0.636667
	MD00G1084300	0.0166667	0.0166667	0.00666667	0.0166667
	MD00G1084400	0.573333	0.58	0.616667	0.67
	MD00G1084500	0	0	0	0
	MD00G1084600	2.66667	2.56	2.30333	2.88333
	MD00G1084700	0	0	0	0
	MD00G1084800	0	0	0	0
	MD00G1084900	0	0	0	0
	MD00G1085000	0	0	0	0
	MD00G1085100	3.49	5.44	5.92	7.47667
	MD00G1085200	11.8167	11.8833	13.0533	14.4467
	MD00G1085300	0.0166667	0.01	0	0.01
	MD00G1085400	0	0	0	0
	MD00G1085500	28.0867	25.5267	22.2967	23.9767
	MD00G1085600	0.166667	0.2	0.15	0.176667
	MD00G1085700	0	0	0	0
	MD00G1085800	0	0.02	0	0
	MD00G1085900	8.27	6.81667	5.86667	6.56667
	MD00G1086100	3.31	3.15333	2.64	2.94667
	MD00G1086200	28.94	34.5833	45.2033	37.1067
	MD00G1086300	0	0	0	0.03
	MD00G1086500	0.553333	0.746667	0.84	1.3
	MD00G1086800	1.85333	1.34333	0.796667	0.75
	MD00G1086900	0.0266667	0.00666667	0	0
	MD00G1087000	8.37	7.52333	8.05	8.20333
	MD00G1087100	0.393333	0.29	0.423333	0.293333
	MD00G1087200	0	0	0	0
	MD00G1087300	9.99667	8.49	7.50667	8.29667
	MD00G1087400	37.3133	41.2333	41.07	42.27
	MD00G1087500	37.71	44.19	49.5533	49.34
	MD00G1087600	0.0333333	0.0533333	0.0333333	0.05
	MD00G1087700	6.37	6.2	4.96333	6.21667
	MD00G1087800	0	0	0	0
	MD00G1087900	0	0.01	0	0
	MD00G1088100	1.40333	1.51	2.19	3.01667
	MD00G1088300	0	0	0	0
	MD00G1088400	0	0	0	0
	MD00G1088500	0	0.0333333	0	0
	MD00G1088600	10.9233	9.71667	9.85	8.58667
	MD00G1089100	56.6867	91.61	118.717	85.7667
	MD00G1089200	11.1867	10.8	9.05667	10.7633
	MD00G1089400	0.0433333	0.106667	0.06	0.0666667
	MD00G1089500	0.453333	0.58	0.783333	0.626667
	MD00G1089600	19.6067	17.2667	12.8867	10.9233
	MD00G1089700	39.2733	33.99	29.7367	28.19
	MD00G1089800	0.0366667	0.0133333	0	0.0133333
	MD00G1089900	0.09	0.09	0.04	0.2
	MD00G1090000	4.93	4.25	3.17667	3.53667
	MD00G1090300	0.476667	0.24	0.423333	0.323333
	MD00G1090500	0.49	0.553333	0.496667	0.583333
	MD00G1090600	0.43	0.76	0.47	0.836667
	MD00G1090900	3.31333	4.04	3.24333	3.68
	MD00G1091100	7.65667	6.97667	6.17333	7.01667
	MD00G1091200	6.86667	8.48	10.92	8.44667
	MD00G1091400	5.66333	6.87667	7.68667	8.81
	MD00G1091500	0.1	0.04	0.133333	0.0433333
	MD00G1091600	13.11	12.5767	11.36	13.5633
	MD00G1091800	15.1933	13.7867	13.31	14.0667
	MD00G1091900	0	0	0	0
	MD00G1092000	0.9	0.866667	1.01333	0.973333
	MD00G1092100	1.58333	1.56667	1.55667	1.6
	MD00G1092300	0	0.0133333	0	0
	MD00G1092400	0	0	0	0
	MD00G1092500	13.3	18.42	34.4667	28.2
	MD00G1092600	5.42333	3.52667	4.13333	3.25667
	MD00G1092700	0	0	0	0
	MD00G1092800	1.15	1.00667	0.676667	0.8
	MD00G1092900	18.4767	14.2533	10.95	10.3633
	MD00G1093000	0	0	0	0.04
	MD00G1093200	0.513333	0.0666667	0.176667	0.306667
	MD00G1093300	10.9633	9.85333	9.50333	10.7167
	MD00G1093400	5.58	3.43333	1.75	1.9
	MD00G1093500	0.03	0.0133333	0.0166667	0.0333333
	MD00G1093600	0.136667	0.166667	0.01	0.486667
	MD00G1093700	0	0	0	0
	MD00G1093800	4.05667	3.36	3.55667	3.10333
	MD00G1093900	0	0	0	0
	MD00G1094000	0	0	0	0
	MD00G1094100	45.3433	42.8	37.3933	38.9867
	MD00G1094600	0.576667	0.566667	0.446667	0.383333
	MD00G1094800	0	0	0.0166667	0
	MD00G1094900	1.98667	1.79667	1.77333	1.71667
	MD00G1095000	0.403333	0.156667	0.0333333	0.03
	MD00G1095100	0.0666667	0.00666667	0.0133333	0.02
	MD00G1095300	15.1933	14.3667	12.12	12.4967
	MD00G1095400	0.0133333	0	0	0
	MD00G1095500	0	0	0	0
	MD00G1095600	0.32	0.326667	0.356667	0.426667
	MD00G1095700	42.94	45.5267	45.92	45.0533
	MD00G1095800	1.65333	1.53333	1.33	1.04
	MD00G1095900	0	0	0	0.0166667
	MD00G1096000	19.31	26.5633	29.83	30.77
	MD00G1096100	0	0	0	0
	MD00G1096200	0.583333	0.416667	0.3	0.503333
	MD00G1096400	0	0	0	0
	MD00G1096500	0	0	0	0
	MD00G1096600	15.58	12.8833	10.1	9.94667
	MD00G1096700	0	0	0.0833333	0
	MD00G1096800	0	0	0	0
	MD00G1096900	0.503333	0.456667	0.243333	0.476667
	MD00G1097000	3.59667	3.40667	3.71667	2.89333
	MD00G1097100	0.346667	0.66	0.396667	0.316667
	MD00G1097200	0	0	0	0
	MD00G1097300	25.59	24.82	27.61	24.4533
	MD00G1097400	0.0533333	0.0333333	0.0166667	0.0333333
	MD00G1097500	2.40667	2.38	1.78	1.88
	MD00G1097600	0	0	0	0
	MD00G1097700	0.586667	0.966667	0.91	0.826667
	MD00G1097800	2.54333	2.66	1.84667	2.56333
	MD00G1098000	0	0.03	0.03	0
	MD00G1098100	0	0	0	0
	MD00G1098200	0.12	0.216667	0.126667	0.163333
	MD00G1098300	0.33	0.866667	1.01	1.30333
	MD00G1098400	17.2167	15.6833	16.37	12.8367
	MD00G1098500	7.06	5.13667	5.29	4.63
	MD00G1098700	0	0	0	0
	MD00G1099100	14.19	13.0433	15.54	13.7
	MD00G1099200	0	0	0	0
	MD00G1099300	0.04	0	0.09	0.123333
	MD00G1099400	5.59333	7.17667	7.51	7.33333
	MD00G1099500	0	0	0	0
	MD00G1099600	0.25	0.386667	0.646667	0.803333
	MD00G1099700	0	0	0	0
	MD00G1099800	42.3433	38.79	51.6	43.98
	MD00G1099900	0	0	0	0
	MD00G1100000	14.1133	11.87	13.4433	12.5133
	MD00G1100500	1.91667	1.92333	1.89	1.93333
	MD00G1100600	11.8433	11.0267	10.1167	11.4567
	MD00G1100700	0	0	0	0
	MD00G1100800	0	0	0	0
	MD00G1101100	0.873333	0.773333	0.87	0.676667
	MD00G1101200	0	0	0	0
	MD00G1101300	0	0.0633333	0.0366667	0.03
	MD00G1101400	0.683333	0.893333	0.793333	0.973333
	MD00G1101500	0.0133333	0.0233333	0.0266667	0.0266667
	MD00G1101600	0	0	0	0
	MD00G1101700	10.1033	6.76667	5.15333	5.04333
	MD00G1101900	4.50667	4.07667	4.33	4.21333
	MD00G1102000	0	0	0	0
	MD00G1102100	2.97	2.98333	2.76	3.14
	MD00G1102200	1.01	0.693333	0.623333	0.81
	MD00G1102300	0.0966667	0.0666667	0	0
	MD00G1102500	0.373333	0.25	0.233333	0.0933333
	MD00G1102700	151.94	73.6467	87.07	77.66
	MD00G1102900	2.23333	2.61	2.83667	2.72667
	MD00G1103000	0	0	0	0
	MD00G1103100	81.62	132.897	168.483	164.8
	MD00G1103300	21.22	20.19	25.1867	19.3733
	MD00G1103500	0	0	0	0
	MD00G1103600	0	0	0	0
	MD00G1103700	0	0	0	0
	MD00G1103800	12.8233	11.3467	11.3467	12.3267
	MD00G1103900	7.48333	6	5.44	5.75
	MD00G1104000	33.71	37.2367	41.1133	41.2633
	MD00G1104100	11.0667	12.1367	13.3767	11.9567
	MD00G1104200	19.3767	17.8533	18.8167	17.6467
	MD00G1104300	3.15333	2.81	2.96333	3.43667
	MD00G1104400	0.0766667	0.0933333	0.0666667	0.0666667
	MD00G1104600	0.136667	0.0633333	0.06	0.04
	MD00G1104700	1.69667	1.10667	1.27333	1.65
	MD00G1104800	7.11667	6.21	7.12	5.97
	MD00G1104900	1.00333	0.903333	1.06	1.15
	MD00G1105000	0.583333	0.923333	0.626667	0.536667
	MD00G1105100	0	0	0	0
	MD00G1105200	0	0	0	0
	MD00G1105300	0	0	0.0233333	0.0233333
	MD00G1105400	0.00333333	0	0	0
	MD00G1105500	0	0	0	0
	MD00G1105600	8.22333	9.69	11.4133	5.83333
	MD00G1105700	0	0	0	0
	MD00G1105800	0	0	0	0
	MD00G1106100	110.707	101.297	105.693	86.6233
	MD00G1106300	0.0133333	0	0.03	0
	MD00G1106400	10.3833	9.21333	6.26	7.72667
	MD00G1106500	17.76	16.8833	13.73	14.9233
	MD00G1106600	1.23333	1.46	1.67333	2.06333
	MD00G1106700	0	0	0	0
	MD00G1106800	0.4	0.186667	0.103333	0.0966667
	MD00G1106900	0	0.0166667	0	0.0166667
	MD00G1107100	0.123333	0.116667	0.11	0.143333
	MD00G1107200	17.7367	18.2933	21.6533	20.6767
	MD00G1107300	12.2333	11.4367	10.2167	10.0067
	MD00G1107400	0	0	0	0
	MD00G1107500	1.41	1.54667	1.08	1.34333
	MD00G1107600	3.77667	2.75667	2.34	2.63333
	MD00G1107700	159.323	224.013	241.117	303.997
	MD00G1107800	368.233	449.663	442.293	520.317
	MD00G1107900	0	0	0	0
	MD00G1108000	35.0067	35.0733	31.7767	34.4133
	MD00G1108200	16.7333	17.09	17.8033	16.79
	MD00G1108400	0	0	0	0
	MD00G1108500	0	0	0	0
	MD00G1108700	0.9	1.14333	1.40333	1.13333
	MD00G1108800	0	0.0233333	0.0266667	0.0266667
	MD00G1108900	0.893333	0.916667	0.78	1.29333
	MD00G1109100	11.5033	10.0533	10.9167	8.67333
	MD00G1109200	718.667	440.85	587.467	561.833
	MD00G1109300	50.9667	45.2733	34.8167	46.9133
	MD00G1109400	3.14667	4.10333	4.74333	3.80667
	MD00G1109500	0.146667	0.0333333	0.0366667	0.04
	MD00G1109600	15.3433	16.58	14.0767	16.8733
	MD00G1109700	319.4	564.75	731.6	554.353
	MD00G1109800	0	0.03	0.0533333	0.05
	MD00G1109900	0.07	0.15	0.123333	0.196667
	MD00G1110200	0.0966667	0.16	0.0933333	0.26
	MD00G1110300	0	0	0	0
	MD00G1110400	3.94	3.24	2.47333	2.73667
	MD00G1110500	11.7533	11.6133	12.5	11.6333
	MD00G1110700	10.8067	10.4167	9.73333	9.35667
	MD00G1110800	0.0133333	0	0	0
	MD00G1110900	0	0	0	0
	MD00G1111000	1.78667	2.78	2.51333	3.16667
	MD00G1111100	0	0	0	0
	MD00G1111200	0	0	0	0
	MD00G1111300	0	0.0166667	0	0.0166667
	MD00G1111400	0.436667	0.863333	0.513333	0.666667
	MD00G1111500	5.62333	11.14	14.5633	16.7
	MD00G1111600	0	0	0.05	0
	MD00G1111700	0.763333	0.69	0.816667	1.05667
	MD00G1111800	111.023	99.9933	102.807	91.57
	MD00G1111900	21.7267	20.0767	19.12	17.9167
	MD00G1112000	0	0	0	0
	MD00G1112100	0	0	0	0
	MD00G1112200	0	0	0	0
	MD00G1112300	0	0	0	0
	MD00G1112400	0.0933333	0.116667	0.126667	0.106667
	MD00G1112500	3.74	4.89333	4.31667	4.92667
	MD00G1113000	2.40333	3.01	3.57667	5.51333
	MD00G1113200	4.85333	4.42333	4.69	4.16333
	MD00G1113300	0	0	0	0
	MD00G1113500	0	0	0	0
	MD00G1113600	0	0	0	0
	MD00G1113700	4.61667	4.77667	4.29667	4.31
	MD00G1113800	5.44333	5.65333	4.67	5.33667
	MD00G1113900	3.69333	4.12	2.69	3.24
	MD00G1114000	0	0.03	0	0
	MD00G1114100	1.64333	1.04	0.763333	0.796667
	MD00G1114200	0.46	0.633333	0.59	0.626667
	MD00G1114300	0.85	0.71	0.506667	0.763333
	MD00G1114400	27.4267	26.06	25.43	23.2567
	MD00G1114500	0.533333	0.646667	0.81	0.943333
	MD00G1114600	0.13	0.216667	0.21	0.253333
	MD00G1114700	0	0	0	0
	MD00G1114800	31.0533	33.4733	33.6067	32.0267
	MD00G1114900	0	0	0	0
	MD00G1115000	0.0166667	0	0	0
	MD00G1115100	1.49333	1.88667	1.83667	1.85
	MD00G1115200	2.84	3.14333	2.40667	1.99333
	MD00G1115300	0.303333	0.226667	0.253333	0.196667
	MD00G1115400	0.323333	0.46	0.606667	0.63
	MD00G1115500	0.0366667	0	0	0
	MD00G1115600	5.68	5.27	4.03667	4.92
	MD00G1115700	39.03	43.8867	61.7133	64.59
	MD00G1115800	0.123333	0.0633333	0.103333	0
	MD00G1115900	0	0.0566667	0.02	0.04
	MD00G1116000	2.83333	3.31667	3.99667	3.02333
	MD00G1116100	10.3467	8.87667	7.38667	9.04
	MD00G1116200	0	0	0	0
	MD00G1116300	6.03333	4.69	4.22667	4.41333
	MD00G1116400	1.56	1.59667	1.32333	1.11333
	MD00G1116600	0.14	0.0566667	0.09	0.6
	MD00G1116700	1.97667	1.68667	1.70333	1.76667
	MD00G1117000	0.413333	0.42	0.266667	0.293333
	MD00G1117100	0	0	0	0
	MD00G1117200	0.0933333	0.163333	0.193333	0.173333
	MD00G1117300	0	0.03	0.106667	0.07
	MD00G1117400	0	0	0	0
	MD00G1117500	0	0	0	0
	MD00G1117700	0	0	0	0
	MD00G1117800	0	0	0	0
	MD00G1117900	0	0	0	0
	MD00G1118000	0	0	0	0
	MD00G1118200	0.00666667	0.00666667	0	0.0233333
	MD00G1118300	0	0	0	0
	MD00G1118400	0.01	0.01	0.01	0
	MD00G1118600	4.81	4.64	4.11	4.49333
	MD00G1118700	0.473333	0.276667	0.303333	0.35
	MD00G1118800	0.0366667	0.03	0.02	0.01
	MD00G1118900	0.06	0.0466667	0.0366667	0.05
	MD00G1119400	1.03	0.64	0.413333	0.503333
	MD00G1119600	0	0	0	0
	MD00G1119900	2.30333	1.47333	0.903333	1.17333
	MD00G1120000	4.32667	3.16	2.32	2.51333
	MD00G1120100	11.6167	11.2967	8.99	9.74667
	MD00G1120300	0.0933333	0.09	0.14	0.113333
	MD00G1120400	1.60667	1.53333	1.52333	1.53667
	MD00G1120600	2.55333	2.99667	2.71	3.40333
	MD00G1120700	2.85	3.37	2.68333	2.59
	MD00G1120800	0.136667	0.156667	0.193333	0.09
	MD00G1120900	1.28667	0.95	0.853333	0.986667
	MD00G1121000	1.46333	1.58	1.47667	1.7
	MD00G1121200	1.62667	1.67	1.26	1.25333
	MD00G1121300	0.0466667	0.193333	0.246667	0.293333
	MD00G1121500	0.176667	0.296667	0.416667	0.56
	MD00G1121600	0.253333	0.403333	0.366667	0.313333
	MD00G1121700	0	0	0	0
	MD00G1122000	0	0	2.34667	0.0866667
	MD00G1122100	0	0	0	0
	MD00G1122200	0	0	0	0
	MD00G1122300	0	0	0	0
	MD00G1122500	0.0566667	0	0.0333333	0
	MD00G1122600	0	0	0	0
	MD00G1122700	0	0.0166667	0	0.0166667
	MD00G1122800	0	0	0	0
	MD00G1122900	0.15	0.19	0.06	0.13
	MD00G1123000	41.8433	34.5467	34.6433	30.9567
	MD00G1123300	152.217	134.213	201.343	166.253
	MD00G1123600	4.88667	3.87	2.61	4.16333
	MD00G1123700	0	0	0	0
	MD00G1123900	0	0	0	0
	MD00G1124000	0	0	0	0
	MD00G1124100	0	0	0	0
	MD00G1124200	0.08	0.07	0.0666667	0.06
	MD00G1124400	0.49	0.413333	0.57	0.403333
	MD00G1124500	0.0533333	0.11	0.0566667	0.0933333
	MD00G1124700	0.0533333	0.0466667	0.0833333	0.07
	MD00G1124900	0	0.24	0.173333	0.116667
	MD00G1125100	33.93	28.8533	26.6867	29.66
	MD00G1125200	1.67667	1.22333	1.07	0.953333
	MD00G1125300	3.64667	1.77	2.21333	1.90667
	MD00G1125400	0	0.04	0	0
	MD00G1125500	8.78667	7.84333	7.03	7.50333
	MD00G1125600	11.6933	10.9467	9.66333	10.2533
	MD00G1125800	3.36	2.52	2.55	2.29667
	MD00G1125900	1.23667	1.94333	2.26	2.33333
	MD00G1126000	0.0566667	0	0.0233333	0.02
	MD00G1126100	0.0366667	0	0.1	0.0133333
	MD00G1126200	4.06667	4.20333	4.75333	2.41
	MD00G1126400	0	0	0	0
	MD00G1126700	0	0	0	0
	MD00G1126800	2.9	3.87	3.48667	3.18
	MD00G1126900	8.98333	7.16667	6.34667	6.51333
	MD00G1127000	5.38	4.81667	3.97	4.53667
	MD00G1127100	0	0.00666667	0	0
	MD00G1127200	0.313333	0.14	0.0666667	0.11
	MD00G1127300	4.90333	4.92	4.18333	4.49
	MD00G1127400	0.0133333	0.0633333	0.0166667	0.03
	MD00G1127500	15.5833	15.0033	15.2667	14.36
	MD00G1127600	0	0	0	0
	MD00G1127700	8.92333	9.76333	15.7067	8.14667
	MD00G1127800	0	0	0	0
	MD00G1127900	27.8867	24.48	24.25	22.5667
	MD00G1128000	0.0433333	0.05	0.04	0.01
	MD00G1128100	30.3267	25.31	26.27	26.59
	MD00G1128200	5.86	5.55	5.07667	5.47
	MD00G1128300	6.84667	7	5.31	5.82333
	MD00G1128400	0.21	0.113333	0.09	0.0866667
	MD00G1128500	0.0233333	0.0466667	0.0533333	0
	MD00G1128800	0	0	0	0
	MD00G1129000	2.94333	1.92	1.97333	2.23333
	MD00G1129100	3.8	4.18333	3.65667	4.1
	MD00G1129200	17.1567	16.57	15.8	16.5733
	MD00G1129300	16.6633	19.04	19.4333	16.7267
	MD00G1129400	1.1	1.62	2.03667	2.01
	MD00G1129500	16.0067	9.85333	8.89	5.69
	MD00G1129700	8.30333	8.20333	8.69333	7.43667
	MD00G1129800	3.48333	4.82667	4.29333	5.34333
	MD00G1129900	0.18	0.146667	0.273333	0.163333
	MD00G1130000	0.933333	1.27333	1.11333	1.28333
	MD00G1130100	2.62	2.76	3.57	2.96
	MD00G1130200	1.70667	2.09333	2.62333	2.76333
	MD00G1130400	0	0	0	0
	MD00G1130500	4.65667	3.86667	3.80667	4.35667
	MD00G1130600	2.94667	2.10333	1.57333	1.63333
	MD00G1130700	1.07	0.733333	0.873333	0.883333
	MD00G1130800	0	0	0	0
	MD00G1130900	24.82	25.05	22.0467	25.7
	MD00G1131000	0.163333	0.236667	0.153333	0.213333
	MD00G1131100	0	0.0133333	0	0
	MD00G1131200	1.89333	1.5	1.31333	1.19667
	MD00G1131300	13.1533	9.75	11.78	11.16
	MD00G1131600	6.85667	6.83667	5.74667	6.41333
	MD00G1131800	60.6267	31.6467	22.8167	13.69
	MD00G1131900	0.146667	0.0766667	0.146667	0.08
	MD00G1132000	0	0	0	0
	MD00G1132100	0	0	0	0
	MD00G1132200	0	0	0	0
	MD00G1132300	8.91667	8.37333	7.46333	8.69667
	MD00G1132400	6.71333	3.44333	3.10333	2.15333
	MD00G1132500	0	0	0	0
	MD00G1132600	13.19	9.32333	10.6633	7.36333
	MD00G1133000	0	0	0	0
	MD00G1133100	0	0	0	0
	MD00G1133200	0.18	0.243333	0.383333	0.316667
	MD00G1133300	1.34667	10.4833	15.91	14.7467
	MD00G1133400	0.333333	0.216667	0	0.19
	MD00G1133500	2.88333	4.13333	7.85	4.39333
	MD00G1133600	0	0.0566667	0	0.0566667
	MD00G1133700	2.64	2	2.17	2.44
	MD00G1133800	0	0	0	0
	MD00G1134000	0	0	0	0
	MD00G1134100	0	0.07	0.0733333	0
	MD00G1134200	0	0	0	0
	MD00G1134400	0.86	0.6	0.62	0.683333
	MD00G1134500	0	0	0	0
	MD00G1134600	3.92667	3.85	3.78667	3.25
	MD00G1134700	0	0	0	0
	MD00G1134800	7.54333	8.12667	7.97667	7.34
	MD00G1134900	0.0433333	0.0466667	0	0
	MD00G1135400	35.4433	40.6767	48.91	41.54
	MD00G1135500	0	0	0	0
	MD00G1135600	28.2533	26.6067	23.3933	22.9667
	MD00G1135700	1.30667	1	0.95	1.01667
	MD00G1135800	0.183333	0.0333333	0.0333333	0.13
	MD00G1135900	0.42	0.49	0.12	0.313333
	MD00G1136000	0.343333	0.416667	0.0833333	0.23
	MD00G1136100	0.213333	0.18	0.0733333	0.14
	MD00G1136200	0.233333	0.113333	0.16	0.0866667
	MD00G1136300	94.2333	89.2233	97.39	79.83
	MD00G1136400	2.52667	2.16	2.84	2.04
	MD00G1136500	17.1267	15.3167	14.0233	13.63
	MD00G1136600	5.49	6.42333	6.28333	6.88667
	MD00G1136700	0	0	0	0
	MD00G1136800	5.42667	5.5	5.77333	5.8
	MD00G1137100	0.01	0	0	0
	MD00G1137200	4.66667	4.77667	4.44667	4.44333
	MD00G1137300	10.42	10.9833	11.83	12.5367
	MD00G1137500	57.97	64.27	63.39	67.0833
	MD00G1137700	0.45	0	0	1.04667
	MD00G1137800	25.04	23.6667	22.6467	19.34
	MD00G1137900	0	0.0166667	0	0.0166667
	MD00G1138000	0	0	0	0
	MD00G1138200	12.7067	12.9367	10.3767	11.4567
	MD00G1138300	68.66	59.3667	58.8933	53.64
	MD00G1138500	0	0	0	0
	MD00G1138600	0	0	0	0
	MD00G1138700	0	0	0.00666667	0
	MD00G1139000	0.05	0.05	0.04	0.21
	MD00G1139200	0	0	0	0
	MD00G1139300	43.75	48.0133	47.77	51.5467
	MD00G1139400	3.11667	2.91	2.72	2.20667
	MD00G1139500	0	0	0	0
	MD00G1139600	1.36	1.60333	1.37667	1.20667
	MD00G1139700	0	0	0	0
	MD00G1139800	0	0	0	0
	MD00G1139900	0	0.00666667	0.00666667	0.03
	MD00G1140000	5.03	2.27	0.81	0.71
	MD00G1140100	0.806667	0.826667	0.803333	1.44
	MD00G1140200	13.9333	13.28	14.0267	12.86
	MD00G1140300	3.45667	1.64333	1.36333	1.47
	MD00G1140400	0	0	0	0
	MD00G1140500	0.27	0.32	0.23	0.243333
	MD00G1140600	4.90667	4.71333	3.99667	4.49
	MD00G1140700	94.4533	85.65	83.73	86.98
	MD00G1140800	109.487	99.33	95.5233	84.41
	MD00G1140900	0	0	0	0
	MD00G1141100	0.31	0.14	0.123333	0.243333
	MD00G1141200	0.03	0	0	0
	MD00G1141300	0	0	0	0
	MD00G1141400	0.03	0.0333333	0.0766667	0
	MD00G1141500	0.0266667	0	0	0
	MD00G1141600	0	0	0	0
	MD00G1141700	23.19	19.48	19.4767	14.9467
	MD00G1141800	0	0	0	0
	MD00G1142200	1.23667	1.10333	1.44333	1.11667
	MD00G1142300	0.523333	0.623333	0.486667	0.683333
	MD00G1142400	0.0433333	0.0333333	0	0.0533333
	MD00G1142500	6.05333	5.21	4.18	5.05667
	MD00G1142600	9.81333	11.0833	10.8833	10.85
	MD00G1142700	0	0	0	0
	MD00G1142800	0	0	0	0.0333333
	MD00G1143000	14.9167	16.3933	17.3767	14.9767
	MD00G1143300	8.65333	7.66333	6.10333	6.69667
	MD00G1143400	10.5467	7.17	7.82	7.43667
	MD00G1143500	19.0833	13.6433	13.58	15.1067
	MD00G1143600	0.243333	0.31	0.37	0.356667
	MD00G1143700	0.0194433	0.05	0.01969	0.07
	MD00G1143800	0	0	0	0
	MD00G1144100	0	0	0	0
	MD00G1144200	0	0	0	0
	MD00G1144300	0.43	0.25	0.246667	0.31
	MD00G1144400	0.0633333	0.02	0.0366667	0.0666667
	MD00G1144500	1.30667	1.35667	1.46	1.41667
	MD00G1144600	0	0.0166667	0	0.0366667
	MD00G1144700	12.7667	8.87	7.02	8.11667
	MD00G1144800	50.8833	54.1733	62.4767	56.5933
	MD00G1145000	8.38	6.07333	6.31333	4.72667
	MD00G1145100	0.306667	0.52	0.273333	0.21
	MD00G1145200	0.0266667	0.04	0.02	0.113333
	MD00G1145300	0.05	0.05	0	0.16
	MD00G1145400	0.496667	0.883333	0.686667	0.56
	MD00G1145500	0	0	0	0
	MD00G1145600	12.74	14.5467	19.3467	12.4067
	MD00G1145700	4.08	3.29667	3.16	3.45667
	MD00G1146200	0	0	0	0
	MD00G1146300	0	0	0	0
	MD00G1146600	0	0	0	0
	MD00G1146800	45.9333	42.5567	41.5333	45.8233
	MD00G1146900	0.0666667	0.0266667	0.0166667	0.00333333
	MD00G1147000	0.796667	0.803333	0.813333	0.893333
	MD00G1147100	0	0.0133333	0	0.0133333
	MD00G1147200	3.21667	2.97667	3.35333	2.71667
	MD00G1147300	0	0	0	0
	MD00G1147600	0.173333	0.116667	0.173333	0.236667
	MD00G1147700	0.39	0.276667	0.41	0.326667
	MD00G1147800	0	0	0	0
	MD00G1148000	8.56	8.15333	7.47333	7.06333
	MD00G1148100	18.1333	22.0133	19.2033	23.3667
	MD00G1148200	4.88	1.54	1.04667	0.6
	MD00G1148300	2.01667	2.16333	1.91	1.65
	MD00G1148400	0	0.0133333	0	0
	MD00G1148500	0.13	0.09	0.0833333	0.1
	MD00G1148600	127.1	131.137	167.467	126.863
	MD00G1148700	0.223333	0.203333	0.376667	0.126667
	MD00G1148800	2.17	2.52667	1.90667	1.98667
	MD00G1148900	0.283333	0.28	0.143333	0.313333
	MD00G1149000	0.01	0.0233333	0.04	0.0366667
	MD00G1149100	0	0	0	0
	MD00G1149200	1.84333	1.45333	1.09667	1.11
	MD00G1149300	9.65667	5.96333	4.03333	4.86333
	MD00G1149400	0	0	0	0
	MD00G1149500	7.91667	7.52333	6.64667	6.55
	MD00G1149800	0	0	0	0
	MD00G1149900	8.93333	7.56667	6.84333	6.67
	MD00G1150000	9.06333	7.23	5.62333	5.76333
	MD00G1150100	0.19	0.0266667	0.286667	0.0833333
	MD00G1150200	0.0466667	0.0233333	0.03	0
	MD00G1150300	0.0366667	0.07	0.19	0.313333
	MD00G1150400	0.143333	0.0966667	0.0633333	0.09
	MD00G1150500	0.693333	0.923333	0.85	0.68
	MD00G1150600	0	0	0	0
	MD00G1150700	0	0	0	0
	MD00G1150800	1.05667	1.10333	0.693333	0.78
	MD00G1150900	0.12	0.253333	0.0566667	0.0566667
	MD00G1151000	0.56	0.506667	0.32	0.74
	MD00G1151100	2.13	2.23333	1.86667	1.66667
	MD00G1151200	4.73333	4.96667	3.78	5.03
	MD00G1151300	0.52	0.306667	0.386667	0.223333
	MD00G1151400	0.143333	0.0733333	0.08	0.216667
	MD00G1151500	3.9	3.04667	3.07667	2.36667
	MD00G1151600	0	0.103333	0.113333	0
	MD00G1151700	0	0	0	0
	MD00G1151800	0	0.0366667	0	0.04
	MD00G1151900	2.57333	3.04	3.65	2.29333
	MD00G1152000	11.2	10.95	8.53	9.86667
	MD00G1152100	5.84	4.62	4.07667	4.87667
	MD00G1152200	0	0.0733333	0.176667	0.0833333
	MD00G1152300	0.41	0.45	0.256667	0.326667
	MD00G1152400	0.326667	0.613333	0.786667	0.676667
	MD00G1152500	2.36667	2.09333	1.63333	1.54667
	MD00G1152600	84.7567	104.517	136.597	112.27
	MD00G1152700	8.23667	7.67	7.13	6.50667
	MD00G1152800	0.02	0.0233333	0	0
	MD00G1152900	0	0.05	0.04	0.0566667
	MD00G1153200	0	0	0	0
	MD00G1153300	0	0	0	0
	MD00G1153400	0	0	0	0
	MD00G1153500	0	0	0	0
	MD00G1153600	0	0	0	0
	MD00G1153700	0	0	0	0
	MD00G1153800	0	0	0	0
	MD00G1153900	0	0	0	0
	MD00G1154000	0	0	0	0
	MD00G1154100	0.646667	0.623333	0.526667	0.58
	MD00G1154200	5.93667	6.87333	7.67	5.05667
	MD00G1154400	0	0.0166667	0.02	0
	MD00G1154500	0	0	0	0
	MD00G1154600	0	0	0	0
	MD00G1154700	0	0	0	0
	MD00G1154800	0	0	0	0
	MD00G1154900	0	0	0	0
	MD00G1155000	0	0	0	0
	MD00G1155100	0	0	0	0
	MD00G1155200	0.04	0.0633333	0.0666667	0.0533333
	MD00G1155300	0	0	0	0.0566667
	MD00G1155400	5.21	5.82667	5.88	5.53333
	MD00G1156000	10.0867	8.56667	8.26333	8.72333
	MD00G1156100	0.04	0.0233333	0.04	0.0633333
	MD00G1156200	5.93	5.32667	5.26667	7.69
	MD00G1156300	0.733333	0.773333	0.813333	0.583333
	MD00G1156400	1.41333	1.04667	1.09333	1.16
	MD00G1156500	17.5567	16.8767	20.2433	16.3567
	MD00G1156600	0	0	0	0
	MD00G1156800	1.21	1.62667	1.40667	1.18667
	MD00G1156900	3.56333	3.39667	3.30667	3.10667
	MD00G1157000	0.0566667	0	0	0
	MD00G1157200	0.00666667	0.0166667	0.02	0.02
	MD00G1157300	11.0167	12.9367	15.0233	12.4533
	MD00G1157400	24.1067	19.4067	18.0167	16.42
	MD00G1157500	0.08	0.0666667	0.126667	0.07
	MD00G1157700	0	0	0	0
	MD00G1158000	11.29	11.3567	12.0433	10.9933
	MD00G1158300	0.733333	0.406667	0.246667	0.593333
	MD00G1158400	0	0.113333	0.136667	0.21
	MD00G1158500	0.486667	0.47	0.333333	0.416667
	MD00G1158700	0.0233333	0.0266667	0.01	0.05
	MD00G1158800	0	0	0	0
	MD00G1158900	0	0	0	0
	MD00G1159000	0	0	0	0
	MD00G1159100	0.16	0.0466667	0.04	0.0933333
	MD00G1159200	0.213333	0.0766667	0.0466667	0.0666667
	MD00G1159300	55.9333	62.05	68.51	77.8367
	MD00G1159400	10.27	9.78	7.58	9.08333
	MD00G1159500	4.56333	4.76	3.80333	3.48
	MD00G1159900	2.22	2.05333	1.51667	1.65333
	MD00G1160000	1.56	1.75667	1.10333	1.64
	MD00G1160200	4.17667	4.13667	2.6	3.44667
	MD00G1160300	9.16667	9.36	7.92667	8.44
	MD00G1160400	0	0	0.01	0
	MD00G1160500	12.02	13.1033	13.6767	12.78
	MD00G1160600	5.87333	5.12333	5.29333	4.50333
	MD00G1160700	30.7667	29.6467	36.9767	30.5133
	MD00G1160800	0.01	0.01	0	0.01
	MD00G1160900	0.113333	0.13	0.196667	0.0433333
	MD00G1161000	2.13667	3.50667	3.99	4.07
	MD00G1161100	2.23667	2.98333	2.30667	2.44
	MD00G1161300	5.35667	4.75	2.82	4.18667
	MD00G1161400	0.733333	0.766667	0.603333	0.466667
	MD00G1161500	0	0	0	0
	MD00G1161600	0	0.0233333	0.0833333	0
	MD00G1161700	0	0	0	0
	MD00G1162000	0.14	0	0.0866667	0.0533333
	MD00G1162100	0.09	0.113333	0.0266667	0.0233333
	MD00G1162200	0.0233333	0.02	0.0233333	0
	MD00G1162300	0.173333	0.1	0.13	0.233333
	MD00G1162900	0.08	0.04	0.02	0.02
	MD00G1163000	9.02	10.6067	12.89	10.8167
	MD00G1163200	0	0.02	0	0
	MD00G1163300	0.06	0.02	0.12	0.0366667
	MD00G1163400	135.82	189.483	179.507	138.157
	MD00G1163500	0	0	0	0
	MD00G1163800	0.486667	0.596667	0.713333	0.666667
	MD00G1163900	2.1	1.68667	1.57333	1.23667
	MD00G1164000	13.96	12.2467	11.09	10.4967
	MD00G1164200	0	0	0	0
	MD00G1164300	0	0	0	0
	MD00G1164400	0	0	0	0
	MD00G1164600	0	0	0	0
	MD00G1164700	0.00307	0.00333333	0	0
	MD00G1164900	6.69333	6.49	6.31	6.64333
	MD00G1165000	4.04667	3.48	3.23333	3.15667
	MD00G1165100	21.5533	18.65	26.4433	29.6667
	MD00G1165200	2.07	6.86	5.67333	7.64667
	MD00G1165300	0	0	0	0
	MD00G1165400	3.13667	3.91	3.92	4.17
	MD00G1165500	13.8533	12.5667	7.57333	11.7567
	MD00G1165600	18.3233	20.9067	20.6633	18.0867
	MD00G1165700	2.07333	3.21333	2.43	2.00667
	MD00G1165800	0.793333	0.766667	0.86	0.763333
	MD00G1165900	0	0	0	0
	MD00G1166100	1.32333	1.72	3.15	3.90667
	MD00G1166300	0	0	0.03	0
	MD00G1166400	0.136667	0.08	0.04283	0.0666667
	MD00G1166500	0.00666667	0.00666667	0	0.0133333
	MD00G1166600	0	0	0	0
	MD00G1166700	0.74	0.673333	0.726667	0.826667
	MD00G1166800	0	0	0	0
	MD00G1166900	0	0	0	0
	MD00G1167000	0.446667	0.953333	1.35	1.51333
	MD00G1167500	0	0	0	0
	MD00G1167700	4.94667	3.79667	3.81333	3.40667
	MD00G1167800	0	0.0366667	0.0433333	0.02
	MD00G1167900	0	0	0	0
	MD00G1168000	0.116667	0.16	0.0466667	0.0966667
	MD00G1168100	0.193333	0.256667	0.223333	0.236667
	MD00G1168200	0.343333	0.376667	0.61	0.31
	MD00G1168300	0.103333	0.106667	0.0666667	0.11
	MD00G1168400	0.25	0.24	0.2	0.33
	MD00G1168500	0.863333	1.06667	0.74	1.01
	MD00G1168600	0.15	0.716667	0.0866667	0.723333
	MD00G1168700	0.38	0.486667	0.31	0.46
	MD00G1168800	0.67	0.683333	0.656667	0.826667
	MD00G1169400	25.47	28.72	37.5033	35.9667
	MD00G1169500	6.73667	4.13667	4.18333	3.00667
	MD00G1169600	11.3067	9.50333	9.36333	10.04
	MD00G1169700	0.02	0	0.0366667	0.01
	MD00G1169800	0	0	0	0
	MD00G1169900	0	0	0	0
	MD00G1170000	0	0	0	0
	MD00G1170100	0	0	0	0
	MD00G1170400	0.186667	0.28	0.283333	0.39
	MD00G1170600	0	0.02	0	0
	MD00G1170700	0.0566667	0.12	0.06	0.0933333
	MD00G1170800	3.29333	3.16	4.17333	2.95
	MD00G1170900	6.02333	5.62667	4.3	5.37
	MD00G1171100	26.9967	27.34	30.3	26.6633
	MD00G1171200	10.36	10.5333	8.44	9.32333
	MD00G1171400	0	0	0	0
	MD00G1171500	0	0	0	0
	MD00G1171600	0.266667	0.786667	0.953333	1.27333
	MD00G1171700	3.16	2.99333	3.65	2.59333
	MD00G1171800	2.38667	1.74	1.52667	1.71
	MD00G1171900	14.4	13.6333	12.65	14.53
	MD00G1172000	10.6667	10.5533	14.3933	10.1733
	MD00G1172100	21.5667	25.0433	20.2933	31.9433
	MD00G1172200	0.216667	0.303333	0.2	0.186667
	MD00G1172400	0.95	1.29333	1.04667	0.906667
	MD00G1172500	0	0	0	0
	MD00G1172600	0	0	0	0
	MD00G1172700	0.00333333	0.0166667	0.00333333	0.01
	MD00G1172900	2.44667	2.41	2.00333	2.35333
	MD00G1173000	0	0	0	0
	MD00G1173100	0.113333	0.0366667	0.0933333	0.11
	MD00G1173200	0	0	0	0
	MD00G1173300	37.6	39.6333	43.9867	40.3833
	MD00G1173500	0	0	0	0
	MD00G1173600	0.286667	0.71	0.91	0.933333
	MD00G1173700	17.9633	15.8367	8.90667	12.8333
	MD00G1173800	0	0.0166667	0	0
	MD00G1173900	0	0	0	0
	MD00G1174200	3.65333	3.86	4.37	3.17333
	MD00G1174300	4.8	5.46	4.05	4.63
	MD00G1174400	0	0	0	0.0133333
	MD00G1174500	0.313333	0.35	0.34	0.346667
	MD00G1174600	5.16333	5.26333	4.28	3.61
	MD00G1174800	0	0	0	0
	MD00G1174900	0.353333	0.47	0.473333	0.11
	MD00G1175000	4.23	3.75	2.13333	2.22333
	MD00G1175100	0	0	0	0
	MD00G1175200	15.2333	27.0933	23.0033	24.5467
	MD00G1175300	0	0	0.143333	0.0666667
	MD00G1175400	9.42333	9.13667	10.43	8.99
	MD00G1175500	38.6833	45.59	53.3067	57.2
	MD00G1175600	5.29	5	3.73667	3.97333
	MD00G1175700	0	0	0	0
	MD00G1175800	0	0	0	0
	MD00G1175900	0	0	0	0
	MD00G1176000	0	0	0	0
	MD00G1176100	1.95	2.00667	1.56333	2.55667
	MD00G1176300	27.5667	23.47	28.8567	20.96
	MD00G1176400	4.28333	6.13	2.74667	2.17333
	MD00G1176500	0	0	0	0
	MD00G1176700	0	0	0	0
	MD00G1176800	0	0	0	0
	MD00G1176900	0.0466667	0	0	0
	MD00G1177000	0	0	0	0
	MD00G1177100	0	0	0	0
	MD00G1177200	1.50333	1.25667	1.17667	1.49
	MD00G1177300	14.3433	13.52	11.5033	13
	MD00G1177400	15.2167	15.7	15.9933	13.0667
	MD00G1177600	0	0	0	0
	MD00G1177700	0	0	0	0
	MD00G1177800	0	0	0	0
	MD00G1178000	0	0	0	0
	MD00G1178100	0	0	0	0
	MD00G1178200	0	0.0266667	0.02	0.03
	MD00G1178300	2.01	1.78	1.88333	1.69
	MD00G1178400	0.193333	0.406667	0.286667	0.203333
	MD00G1178600	0	0	0	0
	MD00G1178700	0.563333	0.613333	0.563333	0.71
	MD00G1178800	0.0566667	0.0266667	0	0.123333
	MD00G1178900	2.22667	2.84333	3.16	3.28333
	MD00G1179000	20.9533	17.3333	13.8933	16.01
	MD00G1179100	8.74	8.91	7.90667	10.83
	MD00G1179200	9.15667	8.93	10.0367	11.3733
	MD00G1179300	52.86	52.8767	72.8567	47.5033
	MD00G1179400	0.03	0.0166667	0	0
	MD00G1179500	14.8933	15.1233	13.33	13.05
	MD00G1179600	0	0	0	0
	MD00G1179700	0	0	0	0
	MD00G1179800	3.89667	3.33667	3.38	3.48667
	MD00G1179900	0	0	0	0
	MD00G1180000	0	0	0	0
	MD00G1180100	0.06	0.05	0.0266667	0.08
	MD00G1180200	1.57667	1.72667	1.68333	1.70333
	MD00G1180300	9.89667	11.2433	11.31	12.9567
	MD00G1181300	11.39	11.1367	9.89667	10.9433
	MD00G1181400	6.11333	5.47	7.97667	7.24333
	MD00G1181500	0	0	0	0
	MD00G1181600	0	0	0	0
	MD00G1181700	0	0	0	0
	MD00G1181800	35.1967	38.7633	38.7533	38.5167
	MD00G1182100	0.256667	0.38	0.453333	0.456667
	MD00G1182200	4.05333	4.71667	4.7	4.07667
	MD00G1182300	2.92667	3.76	2.79667	3.78667
	MD00G1182400	0	0	0	0
	MD00G1182600	0	0	0	0
	MD00G1182800	0.263333	0.0966667	0.16	0.14
	MD00G1183000	41.6333	51.3167	32.5233	41.5967
	MD00G1183100	0	0	0	0
	MD00G1183300	0	0	0	0
	MD00G1183400	30.8233	27.82	24.2633	25.2867
	MD00G1184000	0.423333	0.0766667	0.0433333	0
	MD00G1184100	0	0	0.03	0.0233333
	MD00G1184200	1.01333	0.696667	0.71	0.876667
	MD00G1184300	28.5333	28.8233	20.8167	26.9433
	MD00G1184400	0	0	0	0
	MD00G1184500	0	0	0	0
	MD00G1184900	6.77	5.48667	4.79667	5.02333
	MD00G1185200	1.95	1.79	1.70333	2.09667
	MD00G1185300	0	0	0	0
	MD00G1185400	5.41	5.50667	4.36	4.39333
	MD00G1185500	8.08333	7.39	6.99333	6.83667
	MD00G1185600	0	0	0	0.04
	MD00G1185700	12.9	13.3567	12.8467	13.76
	MD00G1185800	0	0	0	0
	MD00G1185900	0	0	0	0
	MD00G1186000	0.0166667	0	0.02	0
	MD00G1186100	2.29	2.82333	3.19333	4.28
	MD00G1186200	5.97667	6.36333	7.26	5.60333
	MD00G1186300	0	0	0	0
	MD00G1186400	0	0	0	0
	MD00G1186500	0	0	0	0
	MD00G1186600	0.77	0.56	0.86	0.536667
	MD00G1186700	2.58667	1.02	2.02333	0.493333
	MD00G1186800	0	0	0	0
	MD00G1186900	72.7533	38.8867	44.87	51.54
	MD00G1187000	46.0067	25.5333	19.6767	28.7967
	MD00G1187100	34.6267	16.5033	18.0833	14.25
	MD00G1187200	0.0466667	0.426667	0.18	1.24667
	MD00G1187300	0.756667	0.863333	0.596667	0.83
	MD00G1187400	0	0	0	0
	MD00G1187500	2.86	2.34	1.92667	2.22667
	MD00G1187600	0	0	0	0
	MD00G1187700	0	0	0	0
	MD00G1187800	0	0	0	0
	MD00G1188000	0	0	0	0
	MD00G1188100	0	0	0	0
	MD00G1188200	0	0.05	0.06	0.0266667
	MD00G1188300	1.66	1.90333	1.43333	1.78667
	MD00G1188400	0	0	0.0733333	0.0433333
	MD00G1188500	0	0	0	0
	MD00G1188600	1.50333	1.55333	1.79667	1.2
	MD00G1188700	5.65667	7.01333	5.80667	7.82
	MD00G1188900	0	0	0	0
	MD00G1189000	17.8367	32.9833	53.62	48.7433
	MD00G1189100	0.286667	0.586667	0.4	0.653333
	MD00G1189200	12.5267	11.3233	11.4233	11.1867
	MD00G1189300	2.33333	3.11333	2.9	3.17667
	MD00G1189400	4.71333	3.69667	4.27667	3.51
	MD00G1189500	0	0	0	0
	MD00G1189600	4.66333	5.04667	5.26667	4.02
	MD00G1189900	0.02	0.0366667	0.103333	0.02
	MD00G1190000	0	0	0	0
	MD00G1190200	0	0	0	0
	MD00G1190500	4.08333	0	6.70333	7.49667
	MD00G1190600	0	0	0	0
	MD00G1190700	0.0566667	0.14	0.0633333	0.3
	MD00G1190800	15.0533	14.87	15.21	19.64
	MD00G1190900	0	0	0	0.0366667
	MD00G1191000	0	0	0	0
	MD00G1191600	12.3667	19.3133	20.47	21.78
	MD00G1191700	0	0	0	0
	MD00G1191800	57.84	65.9867	68.0467	77.6167
	MD00G1191900	0	0	0	0
	MD00G1192000	0	0	0	0
	MD00G1192100	0	0	0	0
	MD00G1192300	0	0	0	0
	MD00G1192400	11.8	12.3867	12.2867	10.3167
	MD00G1192500	0.0366667	0	0	0
	MD00G1192600	0	0	0	0
	MD00G1192700	0.203333	0.276667	0.186667	0.4
	MD00G1192800	66.26	88.0167	76.3833	74.7767
	MD00G1192900	32.2467	34.0967	20.93	20.42
	MD00G1193000	0.86	0.71	0.636667	0.516667
	MD00G1193100	0.786667	1.18333	0.526667	1.13333
	MD00G1193200	0	0	0	0
	MD00G1199400	1.87667	2.02667	1.78	1.17
	MD00G1199500	0.223333	0.123333	0.0366667	0
	MD00G1199600	68.5867	85.5167	108.353	90.9467
	MD00G1199800	0	0.0366667	0	0
	MD00G1199900	0	0	0	0
	MD00G1200000	0.0266667	0	0	0
	MD00G1200100	0	0	0	0.02
	MD00G1200200	0.176667	0.733333	0.45	0.453333
	MD00G1200300	0.1	0.0633333	0	0.216667
	MD00G1200700	0.0266667	0	0.0266667	0
	MD00G1200800	0	0	0	0
	MD00G1200900	0.676667	0.9	1.00667	1.18333
	MD00G1201000	26.5233	22.4867	19.1033	19.7867
	MD00G1201200	0	0	0	0
	MD00G1201300	0.02	0.19	0.286667	0.416667
	MD00G1201500	0	0	0	0
	MD00G1201600	155.707	141.673	118.457	120.847
	MD00G1201700	0	0.0166667	0.02	0
	MD00G1201800	2.87333	2.06667	2.52667	2.34
	MD00G1201900	0	0	0	0
	MD00G1202000	0	0	0	0
	MD00G1202100	0	0	0	0
	MD00G1202300	1.64333	2.03667	1.07	1.68333
	MD00G1202400	0.38	0.54	0.44	0.523333
	MD00G1202500	0	0	0	0
	MD00G1202600	0.49	0.61	0.5	0.31
	MD00G1202900	0.456667	0.68	0.463333	0.7
	MD00G1203100	0.0166667	0.0166667	0.0766667	0
	MD00G1203200	0.0433333	0.05	0.0333333	0.0333333
	MD00G1203300	0	0	0	0
	MD00G1203400	1.99	1.91667	1.84	0.923333
	MD00G1203500	6.45667	5.55667	5.97	4.29667
	MD00G1203600	3.17667	2.63	2.18333	2.10333
	MD00G1203700	2.01667	2.01	1.19333	1.14667
	MD00G1203800	2.04667	1.99333	1.63	1.93667
	MD00G1204100	34.01	30.3833	26.6667	24.11
	MD00G1204200	0	0	0	0
	MD00G1204500	0	0	0	0
	MD00G1204600	2.72	1.60667	0.983333	0.673333
	MD00G1204700	74.14	69.29	57.2333	69.8867
	MD00G1204900	0	0	0	0
	MD00G1205000	0	0	0	0
	MD00G1205100	0	0	0	0
	MD00G1205200	0	0	0	0
	MD00G1205500	0	0	0	0
	MD00G1205700	15.3567	14.56	10.28	11.18
	MD00G1205900	0	0.0166667	0.02	0.0366667
	MD00G1206000	0	0.0133333	0	0.00333333
	MD00G1206300	0	0	0	0
	MD00G1206400	0.09	0.163333	0	0.303333
	MD00G1206500	0	0	0	0
	MD00G1206600	0	0	0	0
	MD00G1206700	0	0	0	0
	MD00G1206800	1.38667	0.943333	0.596667	0.676667
	MD00G1206900	0	0	0.0333333	0
	MD00G1207000	5.84667	5.45	4.89333	5.83
	MD00G1207100	0	0	0	0
	MD00G1207200	0	0	0	0
	MD00G1207300	8.90667	6	6.26	4.81
	MD00G1207400	0	0	0	0
	MD00G1207500	0	0	0	0
	MD00G1207600	0	0	0	0
	MD00G1207700	0	0	0	0
	MD00G1207800	0.00666667	0.00666667	0	0
	MD00G1208000	0	0	0	0
	MD00G1208200	0.473333	0.616667	0.36	0.946667
	MD00G1208300	0.0566667	0.106667	0.07	0.0666667
	MD00G1208400	2.28	2.42667	2.09	2.39333
	MD00G1208500	2.73667	4.21	2.40333	3.89333
	MD00G1208600	10.8133	10.83	8.63667	8.98333
	MD00G1208700	0	0	0	0
	MD00G1214100	21.79	24.0733	26.5367	23.2533
	MD00G1214200	0.52	0.426667	0.413333	0.57
	MD00G1214300	0.15	0.193333	0.113333	0.163333
	MD00G1214400	0	0	0	0
	MD00G1214500	4.96333	5.28	4.32	3.87333
	MD00G1214600	0	0	0	0
	MD00G1214800	8.02	7.64333	8.65	8.79
	MD00G1214900	0	0	0	0
	MD00G1215000	0	0	0	0.0233333
	MD00G1215200	0	0	0	0
	MD00G1215300	0	0	0	0
	MD00G1215500	0	0	0	0
	MD00G1215600	0	0	0.126667	0
	MD00G1215700	1.57333	1.68333	1.26	1.44667
	MD00G1215800	1.61333	1.49333	2.08333	1.22
	MD00G1219900	0	0	0	0
	MD00G1220000	3.62667	3.33667	2.61	3.24667
	MD00G1220200	0.11	0.213333	0.0266667	0
	MD00G1220300	1.76	1.09667	0.966667	0.846667
	MD00G1220400	0.0333333	0.07	0	0.0733333
	MD00G1220500	0	0	0	0
	MD00G1220600	174.217	179.307	183.83	174.55
	MD00G1220700	0	0	0.0733333	0.146667
	MD00G1220800	5.13	3.82	4.21333	4.67333
	MD00G1220900	2.89	2.68	2.18333	2.64
	MD00G1221000	13.0867	15.7967	17.61	18.2
	MD00G1221100	0.04	0.19	0.1	0.146667
	MD00G1221200	0	0	0	0
	MD00G1221400	104.45	61.0633	59.3567	56.4533
	MD00G1221500	0	0	0	0
	MD00G1221600	0	0	0	0
	MD00G1221700	0	0	0	0
	MD00G1221800	0	0	0	0
	MD00G1221900	0	0	0	0
	MD01G1000100	0	0	0	0
	MD01G1000200	14.4933	10.1467	8.70333	7.24333
	MD01G1000300	16.9833	17.2567	17.9733	17.66
	MD01G1000900	0	0	0	0
	MD01G1001000	0	0	0	0
	MD01G1001200	21.0433	18.8933	20.5467	19.14
	MD01G1001300	0	0	0	0
	MD01G1001600	91.94	93.0833	89.2367	87.2733
	MD01G1001800	0	0	0	0
	MD01G1001900	9.25667	8.29667	6.27333	6.91333
	MD01G1002000	0.34	0.16	0.183333	0.213333
	MD01G1002100	0	0	0	0
	MD01G1002300	0	0	0	0
	MD01G1002400	3.22667	2.53	2.20333	2.02667
	MD01G1002500	0.0866667	0.0766667	0.0166667	0.03
	MD01G1003000	0.0466667	0.103333	0.0266667	0.0233333
	MD01G1003600	22.5833	26.96	29.9167	32.11
	MD01G1003700	2.23667	2.45	2.54	2.87333
	MD01G1003800	2.11667	1.4	1.72333	1.25333
	MD01G1004000	0.433333	0.58	0.273333	0.403333
	MD01G1004100	1.24667	1.53667	1.19	1.43333
	MD01G1004200	10.8733	10.1867	9.26667	9.03333
	MD01G1004300	90.2667	173.527	210.897	210.35
	MD01G1004400	0.35	0.586667	0.55	0.626667
	MD01G1004500	0	0	0	0
	MD01G1004600	0	0	0	0
	MD01G1004700	0.0533333	0	0.07	0
	MD01G1005100	0	0	0	0
	MD01G1005300	0	0	0	0
	MD01G1005400	36.1867	36.04	37.63	37.41
	MD01G1005500	11.6167	10.8667	12.4933	11.4567
	MD01G1005600	3.12	3.98333	4.08667	4.21333
	MD01G1005700	11.6667	13.8533	13.9	13.4
	MD01G1005800	1.01333	1.13333	0.783333	0.94
	MD01G1005900	0.99	0.863333	0.436667	0.59
	MD01G1006000	0	0	0.0366667	0
	MD01G1006100	0	0	0	0
	MD01G1006200	1.21667	1.33667	1.05667	1.37
	MD01G1006300	2.90333	3.24	2.88	3.03667
	MD01G1006400	5.65667	5.76333	9.51333	6.23667
	MD01G1006500	0	0	0	0
	MD01G1006600	9.86667	16.8867	14.3867	29.9133
	MD01G1006900	0	0	0	0
	MD01G1007000	0	0	0	0
	MD01G1007200	0	0	0	0
	MD01G1007300	0	0	0	0
	MD01G1007700	0	0	0	0
	MD01G1007800	0.166667	0.14	0.0766667	0.146667
	MD01G1007900	0.116667	0.183333	0.15	0.14
	MD01G1008700	0.12	0.0966667	0.0833333	0.0766667
	MD01G1008800	0	0	0	0
	MD01G1008900	12.9333	12.35	14.3633	13.54
	MD01G1009600	0	0	0	0
	MD01G1009700	1.47667	0.963333	1.05333	1.81333
	MD01G1009800	3.16333	2.74333	2.64667	2.28333
	MD01G1009900	4.21	3.57667	3.00333	3.32667
	MD01G1010000	6.31667	4.49333	5.45	5.04333
	MD01G1010100	4.76	4.22667	3.95333	4.67
	MD01G1010200	0	0	0	0
	MD01G1010300	0.143333	0.19	0.02	0.14
	MD01G1010900	0.413333	0.35	0.296667	0.336667
	MD01G1011000	0	0	0	0
	MD01G1011600	0.03	0.00666667	0.00666667	0.00666667
	MD01G1011700	20.5833	24.2333	27.3533	27.3167
	MD01G1011800	5.10333	4.1	3.89667	4.82333
	MD01G1012000	0.33	0.396667	0.423333	0.496667
	MD01G1012100	6.14	5.92	7.77	5.51
	MD01G1012300	2.51	2.9	3.76	3.63333
	MD01G1012400	0	0	0	0
	MD01G1012600	0.483333	0.256667	0.173333	0.27
	MD01G1012700	0	0	0	0
	MD01G1012800	0	0	0	0
	MD01G1013000	0	0	0.00666667	0.00666667
	MD01G1013200	0	0	0	0
	MD01G1013300	2.41	2.28333	2.01667	1.68333
	MD01G1013400	6.18333	5.71	4.91667	5.26667
	MD01G1013500	0.616667	0.853333	0.52	0.706667
	MD01G1013800	0	0.0133333	0	0
	MD01G1014200	5.2	4.42667	2.95	3.82
	MD01G1014300	1.77667	1.61667	1.47667	1.51
	MD01G1014400	0	0	0	0
	MD01G1014700	0.133333	0.06	0.113333	0.11
	MD01G1014800	0	0	0	0
	MD01G1015400	0	0	0	0
	MD01G1015700	0.93	1.85333	2.43333	1.66667
	MD01G1015800	3.15	3.12	2.57667	2.34667
	MD01G1016100	0	0	0	0
	MD01G1016400	0.01	0	0	0
	MD01G1016500	7.90333	7.37333	8.04	6.85333
	MD01G1016600	3.10333	2.04	1.66333	1.84333
	MD01G1016700	6.88667	7.32333	7.35	7.21667
	MD01G1017000	0.456667	0.466667	0.283333	0.253333
	MD01G1017100	3.26	2.69333	2.68667	2.68667
	MD01G1017400	5.90333	5.7	4.47	4.29667
	MD01G1017500	4.72667	4.59667	2.49333	3.17333
	MD01G1017700	6.41333	6.47333	5.71667	6.01
	MD01G1017800	0.133333	0.13	0	0.143333
	MD01G1017900	46.8767	46.7133	39.2667	44.09
	MD01G1018100	1.14333	1.07	0.693333	0.863333
	MD01G1018200	1	1.2	1.33667	1.18
	MD01G1018400	0	0	0.03	0
	MD01G1018500	0	0	0	0
	MD01G1018600	0.963333	0.99	0.993333	0.71
	MD01G1018700	0	0	0	0
	MD01G1018800	4.61	4.90667	4.29	4.7
	MD01G1019000	0.916667	0.723333	0.573333	0.593333
	MD01G1019100	0	0	0	0
	MD01G1019200	0	0	0	0
	MD01G1019300	0	0	0	0
	MD01G1019500	19.4133	12.4067	12.1267	9.89
	MD01G1019600	0.34	0.33	0.29	0.373333
	MD01G1019700	23.7067	21.33	18.0767	19.9533
	MD01G1019800	11.42	11.0833	10.56	9.44667
	MD01G1019900	0	0	0	0
	MD01G1020000	0	0	0	0
	MD01G1020100	25.5033	15.7833	15.55	11.58
	MD01G1020300	45.0067	41.19	38.4233	41.4433
	MD01G1020400	0.53	0.71	0.296667	0.55
	MD01G1020500	0.743333	0.956667	0.76	0.78
	MD01G1020600	0	0	0	0
	MD01G1021000	129.663	124.267	145.64	136.47
	MD01G1021100	0	0	0	0
	MD01G1021200	0	0	0	0
	MD01G1021300	0	0	0	0
	MD01G1021400	0	0	0	0
	MD01G1021500	0	0	0	0
	MD01G1021600	5.28	4.77333	4.80667	3.74667
	MD01G1021700	0	0.0333333	0.203333	0.1
	MD01G1021800	9.16333	9.96333	10.2567	10.4667
	MD01G1021900	1.32333	1.51667	2.41	1.79333
	MD01G1022200	0.03	0.0266667	0.0966667	0.22
	MD01G1022300	5.39667	4.83	4.54667	5.12333
	MD01G1022400	3.88	3.75	3.74	3.69333
	MD01G1022500	3.89333	3.53333	2.96667	3.35
	MD01G1022600	0	0	0	0
	MD01G1022700	27.6667	27.37	20.37	23.5667
	MD01G1022800	0	0	0	0
	MD01G1023000	0	0	0	0
	MD01G1023100	0	0	0	0
	MD01G1023200	1.42	1.69333	1.73	1.61333
	MD01G1023300	0	0	0	0
	MD01G1023400	6.88667	7.08667	7.08333	5.67667
	MD01G1023500	0	0	0	0
	MD01G1023800	2.73333	3.42333	3.21667	1.79
	MD01G1023900	14.4333	13.3267	12.5167	13.9667
	MD01G1024000	2.11	2.02333	1.35	1.57
	MD01G1024100	1.57667	0.996667	0.876667	0.913333
	MD01G1024200	0.0333333	0.1	0.146667	0.123333
	MD01G1024400	19.38	15.6833	14.2033	16.27
	MD01G1024500	0	0	0	0
	MD01G1024600	35.3333	7.65333	4.30667	4.92333
	MD01G1024700	0	0	0	0
	MD01G1024900	50.0233	43.1933	41.7767	39.6067
	MD01G1025300	26.68	17.2733	18.12	17.4067
	MD01G1025400	12.1867	13.43	15.1133	17.8633
	MD01G1025500	0.0633333	0.0733333	0.0366667	0.07
	MD01G1025600	0	0	0	0
	MD01G1025800	1.66333	1.79	1.63333	1.54
	MD01G1025900	0	0.02	0.0233333	0.0633333
	MD01G1026000	1.53	1.61333	1.82667	1.55333
	MD01G1026100	0	0	0	0
	MD01G1026200	0.373333	0.256667	0.293333	0.28
	MD01G1026300	0.466667	0.393333	0.37	0.35
	MD01G1026400	5.44	3.96	2.78333	2.75333
	MD01G1026600	0	0	0	0
	MD01G1027000	2.33333	2.24333	2.24333	1.95333
	MD01G1027200	53.6933	44.6467	37.0933	27.2567
	MD01G1027300	0	0	0	0
	MD01G1027400	17.8167	20.58	20.1333	18.6433
	MD01G1027500	0	0.00666667	0	0
	MD01G1027600	4.65333	4.83667	4.21667	3.33333
	MD01G1027700	0.646667	0.29	0.15	0.213333
	MD01G1027800	0	0	0	0
	MD01G1027900	0.393333	0.22	0.12	0.226667
	MD01G1028100	7.44667	5.15333	4.3	5.25
	MD01G1028300	0.743333	0.74	0.736667	0.663333
	MD01G1028400	0	0	0	0
	MD01G1028500	0.4	0.576667	0.626667	0.79
	MD01G1028600	0	0	0	0
	MD01G1028700	0.1	0.103333	0.0333333	0.01
	MD01G1028800	0.646667	0.97	1.04	0.73
	MD01G1028900	0.03	0.03	0.0333333	0.0933333
	MD01G1029000	18.6933	20.4533	25.31	25.4933
	MD01G1029100	1.54	2.35	5.99667	10.5767
	MD01G1029200	1.17333	0.506667	0.51	0.563333
	MD01G1029300	0.0666667	0	0.2	0.116667
	MD01G1029500	0	0	0	0
	MD01G1029700	29.1467	23.7433	21.25	17.6567
	MD01G1029800	13.3267	10.9	9.70333	8.38333
	MD01G1029900	0.18	0.0633333	0.193333	0.126667
	MD01G1030100	20.6	19.5267	21.47	23.82
	MD01G1030300	0.636667	1.13333	0.783333	1.30333
	MD01G1030500	0	0	0	0
	MD01G1030600	1.83	1.81333	2.44667	1.62667
	MD01G1030700	0	0	0	0
	MD01G1030800	0.433333	0.306667	0.293333	0.166667
	MD01G1030900	0.913333	0.696667	0.56	0.41
	MD01G1031100	5.16667	4.41	3.30333	3.74333
	MD01G1031200	9.05	8.06667	8.66667	7.6
	MD01G1031300	25.8667	24.8867	30.2767	22.7033
	MD01G1031400	0.1	0.0666667	0.113333	0.206667
	MD01G1031700	0	0.0266667	0	0.0433333
	MD01G1032000	6.01667	4.40667	4.12333	3.50333
	MD01G1032200	16.5833	14.25	14.3933	12.6433
	MD01G1032300	0.366667	0.356667	0.406667	0.353333
	MD01G1032400	19.9767	21.04	22.1567	22.33
	MD01G1032500	1.28667	1.42667	0.903333	0.976667
	MD01G1032700	1.11	0.886667	0.66	0.513333
	MD01G1032800	122.017	90.5967	85.62	68.5367
	MD01G1033000	43.6067	42.6733	40.9867	41.6567
	MD01G1033200	0.0166667	0.00666667	0	0.0166667
	MD01G1033300	0.1	0.06	0.0633333	0.04
	MD01G1033400	16.4367	17.0867	19.1033	15.8633
	MD01G1033500	2.12667	2.23333	2.14667	2
	MD01G1033600	0	0	0	0.07
	MD01G1033700	0	0	0	0
	MD01G1033800	0	0	0	0
	MD01G1033900	0	0	0	0
	MD01G1034000	13.7267	12.83	15.6667	11.55
	MD01G1034100	12.49	11.2567	13.2	10.75
	MD01G1034200	24.01	22.74	23.6467	21.92
	MD01G1034300	17.9467	15.74	14.4833	14.34
	MD01G1034400	8.05667	9.21667	10.8933	11.8333
	MD01G1034500	0	0.01	0.0266667	0.0266667
	MD01G1034900	0.0133333	0	0	0
	MD01G1035000	32.5933	35.7067	35.78	41.3867
	MD01G1035100	3.33667	2.76333	2.72	2.18667
	MD01G1035200	0	0	0	0
	MD01G1035300	714.67	694.153	751.833	591.047
	MD01G1035400	4.98667	3.28333	2.69667	2.42333
	MD01G1035500	2.90333	3.42	3.14667	3.09667
	MD01G1035600	2.86667	2.26667	2.42	2.18
	MD01G1035800	0	0	0	0
	MD01G1036100	0	0	0	0
	MD01G1036200	114.523	108.45	120.49	101.957
	MD01G1036300	0	0	0	0
	MD01G1036400	0	0	0	0
	MD01G1036500	36.2533	30.7267	26.4933	28.0033
	MD01G1036600	9.64333	8.10333	6.29667	7.10667
	MD01G1036700	0.0466667	0.0633333	0	0
	MD01G1036800	0	0	0	0
	MD01G1036900	9.10667	6.73	5.3	6.31667
	MD01G1037000	3.21667	3.37667	2.92	2.7
	MD01G1037100	0.01	0	0	0
	MD01G1037200	0.0466667	0.07	0.04	0.0466667
	MD01G1037300	0.823333	0.536667	0.64	0.743333
	MD01G1037400	2.80667	2.18333	1.41333	1.61
	MD01G1037500	0.316667	0.343333	0.723333	0.556667
	MD01G1037600	2.96333	3.49333	3.72667	2.57667
	MD01G1037700	37.7567	36.23	37.9533	29.1533
	MD01G1037800	1.29667	1.25333	0.873333	0.936667
	MD01G1037900	1.45	1.76	1.43667	1.59667
	MD01G1038000	0.173333	0.14	0.22	0.383333
	MD01G1038200	2.12333	2.47667	1.93	2.23
	MD01G1038300	0	0.0733333	0.17	0.153333
	MD01G1038500	0	0	0	0
	MD01G1038600	4.39	2.98667	2.91667	3.20333
	MD01G1038700	6.29	7.08	7.49	6.73667
	MD01G1038800	4.2	4.38	3.87667	4.01333
	MD01G1038900	0.0366667	0.0666667	0.02	0.0333333
	MD01G1039000	0.0366667	0.0433333	0.05	0.03
	MD01G1039100	9.99	10.1233	12.6933	10.4233
	MD01G1039200	12.8267	12.05	12.1733	14.99
	MD01G1039300	3.35333	4.25	4.59333	3.93333
	MD01G1039400	0.0666667	0.0466667	0.0266667	0.06
	MD01G1039500	73.8933	69.38	68.0067	59.5367
	MD01G1039700	1.19667	1.01333	0.763333	0.893333
	MD01G1039800	112.167	120.627	122.01	117.853
	MD01G1039900	5.67333	5.71333	6.11	4.83667
	MD01G1040200	0	0	0	0
	MD01G1040300	0.0866667	0.19	0.176667	0.69
	MD01G1040600	0	0	0	0
	MD01G1040700	0	0	0	0
	MD01G1040800	0.0133333	0.0333333	0	0.00666667
	MD01G1040900	9.05667	9.66333	8.48667	9.06667
	MD01G1041000	0.0766667	0.0966667	0.123333	0.08
	MD01G1041100	16.58	15.14	15.1333	15.1633
	MD01G1041200	3.01667	2.45333	2.40667	2.59333
	MD01G1041300	0.413333	0.15	0.0433333	0.0566667
	MD01G1041400	0	0	0	0
	MD01G1041500	0.9	0.543333	0.606667	0.71
	MD01G1041600	0	0	0	0
	MD01G1041700	0.65	0.37	0.43	0.6
	MD01G1041800	0	0	0	0
	MD01G1041900	37.39	23.1367	22.5933	23.87
	MD01G1042000	0	0	0	0
	MD01G1042100	0	0.03	0.0333333	0.03
	MD01G1042300	0	0	0	0
	MD01G1042400	7.73667	6.18333	6.11667	5.67333
	MD01G1042500	3.58333	3.50333	3.37333	2.71333
	MD01G1042600	0	0.04	0	0
	MD01G1042700	0	0.0633333	0.0366667	0
	MD01G1042800	0.79	0.59	0.873333	0.59
	MD01G1042900	0.0966667	0.0366667	0.0133333	0.0266667
	MD01G1043100	0.433333	0.823333	0.65	0.923333
	MD01G1043200	0	0	0	0
	MD01G1043300	0.883333	1.11	1.28333	1.38333
	MD01G1043400	0	0	0	0
	MD01G1043500	0	0	0	0
	MD01G1043900	0	0.0433333	0	0
	MD01G1044000	0	0	0	0
	MD01G1044100	469.67	651.47	742.177	790.827
	MD01G1044200	89.2933	86.27	75.8667	82.6533
	MD01G1044300	0	0	0	0
	MD01G1044400	10.1933	10.99	14.3933	10.6133
	MD01G1044500	0.706667	0.586667	0.593333	0.576667
	MD01G1044600	0.646667	0.403333	0.223333	0.266667
	MD01G1044700	17.14	17.19	17.9067	17.5433
	MD01G1044800	0	0	0	0
	MD01G1044900	42.5967	40.2567	34.08	41.6433
	MD01G1045000	0	0	0	0
	MD01G1045100	0	0	0	0
	MD01G1045200	30.9333	40.1133	48.28	35.3867
	MD01G1045300	3.06	2.14667	1.96	1.86667
	MD01G1045500	0.36	0.116667	0.12	0.1
	MD01G1045600	4.40333	3.12667	2.68333	2.88
	MD01G1045700	1.2	0.67	0.473333	0.526667
	MD01G1045800	27.8	22.89	22.4333	20.0533
	MD01G1045900	3.67333	4.01667	3.77	4.62
	MD01G1046000	11.0567	8.79667	7.96667	7.13
	MD01G1046100	10.5033	8.80333	7.85	7.21333
	MD01G1046200	0.04	0.12	0.133333	0.153333
	MD01G1046300	0	0	0	0
	MD01G1046400	24.5133	24.11	23.9733	24.2667
	MD01G1046500	5.24667	4.75333	5.73333	5.14
	MD01G1046600	0.296667	0.22	0.09	0.13
	MD01G1046700	14.24	20.0067	24.8133	24.62
	MD01G1046800	0.0733333	0.0633333	0.0533333	0.0766667
	MD01G1046900	0.9	0.943333	0.74	0.76
	MD01G1047000	3.11	3.33	3.00333	3.02667
	MD01G1047200	0	0	0	0
	MD01G1047400	0.01	0.0133333	0.0166667	0.0266667
	MD01G1047500	0	0	0	0
	MD01G1047600	0.0133333	0	0.0266667	0.0233333
	MD01G1047800	0	0	0	0
	MD01G1047900	0	0	0	0
	MD01G1048000	0	0	0	0
	MD01G1048300	0	0	0	0
	MD01G1048400	0	0	0	0
	MD01G1048500	6.32667	6.17333	6.01	5.88667
	MD01G1048600	50.6867	42.5967	42.14	40.7267
	MD01G1048700	0.446667	0.346667	0.393333	0.446667
	MD01G1048800	21.9233	26.2733	28.22	19.6533
	MD01G1048900	0.04	0.0266667	0.0166667	0.1
	MD01G1049000	0	0	0	0
	MD01G1049100	6.53667	6.26	7.2	6.78
	MD01G1049200	7.99	7.36	7.95667	8.32
	MD01G1049300	0.0266667	0.05	0.0566667	0
	MD01G1049500	0	0	0	0
	MD01G1049600	0.22	0.173333	0.143333	0.183333
	MD01G1049700	0.8	0.913333	1.07	0.86
	MD01G1050000	0	0	0	0
	MD01G1050100	10.94	8.47	7.58	8.06
	MD01G1050200	21.4967	17.98	15.45	15.3
	MD01G1050300	4.7	4.71667	4.39	4.52
	MD01G1050400	1.56667	1.67333	1.62	1.53333
	MD01G1050500	1.51667	1.95	2.03	1.74667
	MD01G1050600	0	0.04	0	0.05
	MD01G1050800	15.7233	28.2767	29.9767	32.3133
	MD01G1050900	13.1767	22.6	28.8667	26.9833
	MD01G1051000	0	0.0866667	0.1	0.136667
	MD01G1051100	28.5133	34.19	35.3367	30.4467
	MD01G1051200	169.447	205.407	254.11	203.08
	MD01G1051300	0.62	1.21333	1.67667	1.4
	MD01G1051400	31.13	27.3567	26.9467	26.46
	MD01G1051600	0	0	0	0.04
	MD01G1051700	4.64333	4.65667	5.78667	4.55667
	MD01G1051800	0	0	0	0
	MD01G1051900	0	0	0.02	0.05
[truncated: 43,119 more rows]

## Sheet: S3
	Table S3. DEGs in each N fertilization group and the expression level (RPKM) of 2,212 pooled DEGs across all groups
								Expression of the 2,212 pooled DEGs
				Deficient (0x) vs. Control	Excessive (2x) vs. Control	Excessive (4x) vs. Control			Deficient (0x)	Control (1x)	Excessive (2x)	Excessive (4x)
	N condition	Number of DEGs		MD00G1190500	MD00G1190500	MD00G1190500		MD00G1190500	4.08333	0	6.70333	7.49667
	Deficient (0x) vs. Control	1454		MD01G1024600	MD00G1122000	MD16G1128500		MD01G1024600	35.3333	7.65333	4.30667	4.92333
	Excessive (2x) vs. Control	337		MD16G1128500	MD04G1197700	MD05G1314100		MD16G1128500	18.0433	4.09	7.71	11.21
	Excessive (4x) vs. Control	907		MD10G1321600	MD08G1062400	MD10G1166300		MD10G1321600	12.35	4.32	2.05667	2.45333
				MD05G1314100	MD12G1205900	MD02G1175500		MD05G1314100	30.2033	11.75	4.37333	2.15667
				MD10G1166300	MD06G1227300	MD02G1035800		MD10G1166300	78.9233	31.86	51.44	62.25
				MD11G1168500	MD05G1118500	MD13G1076800		MD11G1168500	8.91	3.72667	1.74333	2.1
				MD16G1076400	MD16G1064400	MD16G1076400		MD16G1076400	4.12667	0.27	1.05333	1.31667
				MD11G1093800	MD03G1230600	MD11G1093800		MD11G1093800	67.1433	28.2733	15.87	9.23667
				MD11G1163900	MD15G1176000	MD16G1173500		MD11G1163900	5.66	0.443333	0.326667	0.283333
				MD01G1161300	MD17G1203800	MD10G1330600		MD01G1161300	4.79333	2.06333	4.09667	5.83333
				MD01G1071800	MD10G1029100	MD05G1169600		MD01G1071800	8.37333	0.68	0.316667	0.383333
				MD09G1177500	MD10G1055500	MD01G1161300		MD09G1177500	0.346667	0.0266667	0.04	0.0533333
				MD08G1092600	MD10G1330600	MD07G1201300		MD08G1092600	5.72	2.48	0.493333	0.183333
				MD07G1115200	MD02G1291100	MD08G1092600		MD07G1115200	15.9033	1.35	1.54667	1.5
				MD02G1120100	MD02G1005600	MD08G1086800		MD02G1120100	0.81	0.0633333	0.113333	0.216667
				MD17G1261000	MD15G1234400	MD17G1074300		MD17G1261000	17.2767	1.63333	1.57	0.986667
				MD05G1354000	MD13G1109600	MD17G1130400		MD05G1354000	61.6367	27.49	11.0633	6.44
				MD00G1140000	MD06G1089300	MD05G1354000		MD00G1140000	5.03	2.27	0.81	0.71
				MD13G1076200	MD15G1147800	MD00G1140000		MD13G1076200	15.5733	1.50333	4.90333	5.60333
				MD15G1125000	MD16G1027400	MD05G1156100		MD15G1125000	0.996667	0.503333	0.146667	0.22
				MD06G1088000	MD02G1120300	MD09G1143800		MD06G1088000	0.363333	0.03	0.0466667	0.0133333
				MD05G1246500	MD01G1029100	MD07G1298000		MD05G1246500	16.25	8.22	4.88667	5.38
				MD15G1343500	MD05G1358900	MD15G1060000		MD15G1343500	16.6667	8.73333	3.26333	2.99667
				MD09G1142300	MD08G1005500	MD11G1309800		MD09G1142300	23.28	12.6367	7.29333	5.58
				MD02G1031100	MD15G1269500	MD13G1076200		MD02G1031100	128.83	13.4733	18.09	25.4267
				MD09G1006500	MD15G1253900	MD04G1197700		MD09G1006500	631.107	66.4633	64.07	108.613
				MD17G1272100	MD05G1109100	MD13G1172100		MD17G1272100	80.14	8.58333	5.54	2.18667
				MD15G1019700	MD03G1215100	MD15G1343500		MD15G1019700	28.0133	15.7167	8.31	6.21667
				MD02G1099300	MD13G1086700	MD11G1251800		MD02G1099300	230.967	29.06	24.5567	30.9967
				MD02G1152000	MD15G1294700	MD11G1079600		MD02G1152000	0.216667	0.0266667	0.143333	0.123333
				MD15G1068000	MD04G1129100	MD09G1019900		MD15G1068000	0.64	0.08	0.186667	0.133333
				MD05G1065500	MD09G1049600	MD09G1142300		MD05G1065500	1.58667	0.2	0.103333	0.0166667
				MD02G1319100	MD01G1024600	MD15G1269500		MD02G1319100	4.81	2.71667	1.43667	1.53
				MD07G1219700	MD13G1188500	MD17G1272100		MD07G1219700	0.143333	0.0166667	0.1	0.07
				MD15G1415200	MD11G1229800	MD17G1017000		MD15G1415200	3.31667	1.89667	0.783333	0.633333
				MD07G1221600	MD16G1128500	MD15G1019700		MD07G1221600	0.493333	0.06	0.0466667	0.02
				MD03G1066000	MD06G1215300	MD08G1095100		MD03G1066000	24.06	14.34	23.0867	31.56
				MD06G1043900	MD15G1273300	MD09G1220200		MD06G1043900	133.127	79.2267	48.32	45.69
				MD06G1233500	MD05G1311900	MD02G1319100		MD06G1233500	7.96	1.08333	0.743333	1.74333
				MD03G1044500	MD06G1105500	MD07G1216200		MD03G1044500	12.3733	7.47333	4.44	4.93
				MD17G1175900	MD04G1047700	MD15G1415200		MD17G1175900	174.66	24.0133	23.0667	31.8333
				MD16G1197800	MD00G1052000	MD03G1066000		MD16G1197800	0.173333	0.0233333	0.07	0.123333
				MD07G1046300	MD08G1168100	MD06G1043900		MD07G1046300	0.48	0.07	0.01	0.01
				MD12G1210300	MD17G1015000	MD07G1291000		MD12G1210300	0.62	0.0966667	0.12	0.0966667
				MD09G1278600	MD02G1008400	MD15G1216400		MD09G1278600	1.29	0.2	0.19	0.243333
				MD02G1306200	MD09G1033000	MD04G1064400		MD02G1306200	13.6133	8.37333	4.34333	3.92333
				MD00G1093400	MD16G1000500	MD15G1372400		MD00G1093400	5.58	3.43333	1.75	1.9
				MD11G1012500	MD03G1278400	MD01G1207200		MD11G1012500	4.15333	0.69	1.43333	1.3
				MD16G1050800	MD01G1073600	MD02G1306200		MD16G1050800	14.5933	9.09333	4.48333	3.81333
				MD16G1026500	MD08G1207700	MD00G1093400		MD16G1026500	20.21	3.43333	2.54667	4.10333
				MD13G1077000	MD09G1079600	MD16G1050800		MD13G1077000	6.60667	1.15667	2.13	2.23667
				MD04G1148000	MD12G1144800	MD11G1028200		MD04G1148000	123.617	22.7667	20.54	27.3
				MD02G1258100	MD15G1409700	MD16G1106000		MD02G1258100	1.37333	0.253333	0.246667	0.43
				MD07G1271400	MD07G1080900	MD06G1125700		MD07G1271400	0.93	0.163333	0.29	0.193333
				MD15G1222300	MD11G1298900	MD07G1304200		MD15G1222300	81.1367	15.3667	15.4567	19.2233
				MD08G1220500	MD00G1051100	MD11G1239100		MD08G1220500	1.39	0.263333	0.1	0.123333
				MD06G1044100	MD12G1080200	MD10G1075200		MD06G1044100	33.4733	21.0567	11.2133	11.0233
				MD13G1016100	MD05G1028100	MD06G1044100		MD13G1016100	33.2867	6.73667	6.75	10.86
				MD10G1111000	MD01G1194700	MD12G1136300		MD10G1111000	6.78	1.38	1.06667	0.886667
				MD15G1172700	MD12G1166300	MD15G1082600		MD15G1172700	208.84	43.5367	40.9667	44.8533
				MD12G1136300	MD08G1229100	MD01G1120400		MD12G1136300	22.7867	4.79667	3.19333	1.40667
				MD10G1294500	MD11G1293900	MD06G1195100		MD10G1294500	19.0933	4.04	3.54333	3.73
				MD15G1082600	MD05G1116600	MD15G1095200		MD15G1082600	6.79	4.29	1.49667	1.11333
				MD10G1198500	MD03G1040100	MD14G1224900		MD10G1198500	1.05333	0.23	0.296667	0.27
				MD07G1053900	MD09G1271100	MD13G1116100		MD07G1053900	0.45	0.103333	0.0733333	0.0966667
				MD13G1181900	MD13G1019900	MD12G1042100		MD13G1181900	1.35	0.306667	0.363333	0.243333
				MD07G1230600	MD02G1009400	MD04G1173600		MD07G1230600	51.56	12.0767	9.84667	8.8
				MD01G1217700	MD15G1153500	MD04G1172200		MD01G1217700	0.79	0.18	0.326667	0.34
				MD10G1307500	MD04G1231800	MD03G1211200		MD10G1307500	1.48333	0.37	0.206667	0.213333
				MD16G1040800	MD09G1112200	MD07G1173600		MD16G1040800	3.77667	0.943333	1.11	0.976667
				MD08G1038300	MD05G1072400	MD11G1054000		MD08G1038300	12.1233	3.07	2.50667	3.81333
				MD04G1090600	MD10G1017300	MD02G1080400		MD04G1090600	0.823333	0.21	0.186667	0.11
				MD04G1229200	MD10G1126100	MD17G1025400		MD04G1229200	28.8567	7.46667	8.29667	10.9533
				MD13G1058000	MD15G1404400	MD17G1143900		MD13G1058000	2.18	0.57	0.57	0.43
				MD10G1276400	MD15G1206800	MD13G1071600		MD10G1276400	1.03	0.263333	0.253333	0.18
				MD04G1218500	MD08G1037600	MD03G1040100		MD04G1218500	99.3167	26.2233	28.76	17.0933
				MD02G1020400	MD12G1198900	MD06G1054900		MD02G1020400	44.5533	11.88	9.86	10.1
				MD04G1175500	MD17G1209800	MD05G1054800		MD04G1175500	1.18667	2.25	4.14	4.06
				MD11G1146700	MD01G1006400	MD12G1264200		MD11G1146700	2.90333	0.776667	0.63	0.376667
				MD04G1214600	MD10G1300700	MD14G1133400		MD04G1214600	1.5	0.403333	0.193333	0.16
				MD05G1174000	MD15G1236600	MD17G1222500		MD05G1174000	66.52	17.9033	15.7133	16.0233
				MD09G1028900	MD07G1228500	MD15G1325900		MD09G1028900	1.81	0.49	0.603333	0.69
				MD01G1231600	MD05G1063200	MD16G1056200		MD01G1231600	9.72	2.61333	3.66333	2.08333
				MD14G1098500	MD14G1014500	MD04G1175500		MD14G1098500	0.723333	0.19	0.35	0.436667
				MD14G1240300	MD16G1092700	MD00G1166100		MD14G1240300	87.0333	24	19.63	24.25
				MD01G1214700	MD00G1189000	MD08G1032900		MD01G1214700	0.833333	0.236667	0.0866667	0.12
				MD16G1047300	MD17G1250000	MD13G1081900		MD16G1047300	84.5067	23.6133	21.97	30.9033
				MD14G1124500	MD07G1094700	MD11G1237400		MD14G1124500	0.636667	0.173333	0.233333	0.35
				MD03G1199600	MD03G1287300	MD10G1152100		MD03G1199600	3.38	0.956667	0.753333	0.986667
				MD15G1254600	MD03G1066000	MD07G1182500		MD15G1254600	9.92667	2.85333	3.05	3.42
				MD12G1139500	MD01G1053100	MD14G1242700		MD12G1139500	1.40667	0.4	0.326667	0.55
				MD17G1010400	MD02G1025600	MD02G1207900		MD17G1010400	136.073	39.59	35.3367	49.6733
				MD12G1176400	MD01G1171100	MD12G1062100		MD12G1176400	6.06333	1.76	1.68667	0.736667
				MD14G1194100	MD11G1009500	MD07G1153300		MD14G1194100	1.12667	0.326667	0.653333	0.576667
				MD09G1110300	MD09G1022200	MD08G1095300		MD09G1110300	242.84	71.1233	105.237	140.41
				MD05G1196800	MD17G1193600	MD15G1191800		MD05G1196800	2.23	0.656667	0.416667	0.276667
				MD13G1231100	MD11G1143400	MD13G1065600		MD13G1231100	4.63	1.41333	1.49667	2.18333
				MD09G1037400	MD16G1064200	MD09G1116500		MD09G1037400	1.63333	2.72333	4.58333	6.04667
				MD13G1069200	MD15G1214700	MD05G1028100		MD13G1069200	32.81	10.08	9.11667	6.02667
				MD14G1182700	MD12G1077000	MD14G1041300		MD14G1182700	3.58	1.08	0.526667	0.493333
				MD03G1215000	MD11G1222300	MD10G1029100		MD03G1215000	4.4	1.37333	1.61333	1.61
				MD10G1280000	MD08G1070100	MD03G1062400		MD10G1280000	1.41667	0.443333	0.343333	0.396667
				MD00G1148200	MD04G1047400	MD06G1160900		MD00G1148200	4.88	1.54	1.04667	0.6
				MD05G1306400	MD10G1321600	MD15G1404400		MD05G1306400	14.7433	4.69333	3.37667	2.17667
				MD09G1164500	MD05G1139400	MD09G1036900		MD09G1164500	0.406667	0.126667	0.106667	0.0533333
				MD04G1161900	MD13G1220300	MD09G1110300		MD04G1161900	6.67667	3.46	5.73333	3.22667
				MD16G1019500	MD12G1262900	MD06G1128500		MD16G1019500	2.31333	0.726667	0.903333	0.39
				MD01G1222600	MD08G1133500	MD04G1131700		MD01G1222600	12.1267	3.9	3.69667	5.55667
				MD04G1077000	MD05G1105500	MD14G1142700		MD04G1077000	5.84667	1.91333	1.61667	1.79333
				MD08G1014400	MD15G1428700	MD04G1138500		MD08G1014400	34.41	11.3467	9.75333	6.24667
				MD01G1200400	MD05G1073200	MD05G1139400		MD01G1200400	26.71	8.8	7.92	5.78333
				MD15G1364700	MD10G1311700	MD15G1168500		MD15G1364700	1.30667	0.43	0.303333	0.636667
				MD06G1141800	MD06G1225900	MD09G1037400		MD06G1141800	0.813333	0.27	0.25	0.273333
				MD14G1207600	MD08G1124700	MD12G1089500		MD14G1207600	112.237	37.7367	37.6967	44.5433
				MD07G1158100	MD05G1360600	MD02G1201500		MD07G1158100	1.46333	0.486667	0.303333	0.326667
				MD10G1301800	MD04G1126700	MD12G1057800		MD10G1301800	3.55667	1.20333	1.2	1.07333
				MD07G1297100	MD01G1230300	MD05G1306400		MD07G1297100	3.58	1.99	3.17	2.20333
				MD15G1054300	MD15G1304000	MD12G1259500		MD15G1054300	1.61	2.70667	4.32	5.36333
				MD15G1146100	MD12G1011200	MD03G1277900		MD15G1146100	1.35667	2.62333	4.16	5.61
				MD15G1298700	MD16G1029400	MD12G1058400		MD15G1298700	17.6833	6.06333	5.49	6.88
				MD04G1003400	MD13G1177800	MD15G1182500		MD04G1003400	31.52	10.8467	11.82	22.13
				MD10G1291400	MD07G1303600	MD16G1053900		MD10G1291400	9.29	17.7333	27.5767	18.2833
				MD05G1246300	MD15G1171400	MD08G1189500		MD05G1246300	1.39	0.47	0.403333	0.473333
				MD10G1321800	MD09G1026900	MD03G1278400		MD10G1321800	13.08	4.57	4.21333	2.86667
				MD13G1200700	MD08G1023500	MD02G1026300		MD13G1200700	0.933333	0.323333	0.316667	0.236667
				MD13G1040100	MD17G1046700	MD08G1124700		MD13G1040100	21.61	7.56667	9.51333	8.84333
				MD06G1226700	MD13G1053400	MD01G1063400		MD06G1226700	1.95333	3.23667	4.93667	5.62667
				MD16G1057700	MD15G1020900	MD08G1014400		MD16G1057700	5.05333	1.77667	1.72	1.62
				MD17G1052000	MD00G1041400	MD03G1022000		MD17G1052000	1.58667	0.563333	0.276667	0.493333
				MD08G1029500	MD12G1244800	MD08G1027400		MD08G1029500	111.147	39.5667	51.1733	59.2567
				MD16G1217500	MD00G1123300	MD17G1035400		MD16G1217500	0.936667	0.333333	0.283333	0.503333
				MD08G1242900	MD09G1210700	MD16G1070600		MD08G1242900	42.91	15.2667	13.6467	14.29
				MD00G1052900	MD07G1257100	MD02G1175400		MD00G1052900	1.70333	0.6	0.63	0.486667
				MD17G1221800	MD11G1191900	MD08G1022400		MD17G1221800	1.03	1.81333	2.72333	2.8
				MD17G1106400	MD07G1179100	MD17G1011500		MD17G1106400	33.7567	21	31.75	42.21
				MD06G1010100	MD08G1143400	MD12G1113000		MD06G1010100	6.58667	10.7933	16.3	10.6533
				MD16G1108700	MD09G1270200	MD16G1011800		MD16G1108700	5.09	8.61667	12.9433	17.4967
				MD13G1008700	MD11G1081300	MD15G1054300		MD13G1008700	3.68	1.31667	1.75667	0.776667
				MD10G1231600	MD03G1053100	MD13G1010600		MD10G1231600	4.16	6.38333	9.57667	8.41
				MD06G1046300	MD11G1047500	MD15G1146100		MD06G1046300	5.50333	9.14333	13.7167	14.9967
				MD15G1020000	MD09G1287900	MD16G1196800		MD15G1020000	32.3967	11.5567	13.1233	17.3933
				MD04G1063300	MD09G1050600	MD10G1300700		MD04G1063300	21.4933	7.67333	6.65333	6.25667
				MD08G1091700	MD12G1243500	MD08G1066400		MD08G1091700	23.0767	13.7333	20.49	15.3433
				MD05G1178100	MD05G1291900	MD11G1244800		MD05G1178100	128.307	46.11	58.2567	73.52
				MD01G1228300	MD14G1226200	MD15G1360600		MD01G1228300	1.87667	0.676667	0.456667	0.446667
				MD10G1164500	MD07G1027000	MD02G1292200		MD10G1164500	1.39667	2.67333	3.98667	4.08
				MD14G1010200	MD15G1226600	MD08G1112700		MD14G1010200	3.78333	6.43	9.54333	8.15667
				MD10G1194100	MD12G1078300	MD06G1077800		MD10G1194100	66.8667	24.2267	20.65	22.2733
				MD12G1116700	MD10G1051800	MD12G1119900		MD12G1116700	56.2533	20.5433	16.7833	22.67
				MD14G1090500	MD05G1283600	MD16G1000500		MD14G1090500	41.63	15.2433	15.33	21.6433
				MD11G1075900	MD06G1128900	MD02G1004100		MD11G1075900	43.51	15.9267	13.2733	12.5333
				MD02G1155000	MD06G1160900	MD04G1225400		MD02G1155000	9.94	15.05	22.1267	25.6433
				MD12G1180900	MD07G1135000	MD15G1206800		MD12G1180900	1.65	0.593333	0.633333	0.523333
				MD16G1222100	MD02G1050100	MD02G1130700		MD16G1222100	0.563333	0.21	0.0833333	0.113333
				MD11G1245400	MD05G1314100	MD08G1037600		MD11G1245400	13.8067	5.11333	5.03333	5.32667
				MD07G1271300	MD10G1166300	MD13G1042700		MD07G1271300	1.11667	0.416667	0.346667	0.203333
				MD06G1160600	MD11G1168500	MD16G1165100		MD06G1160600	52.0967	19.4633	20.1133	18.64
				MD15G1042800	MD11G1093800	MD06G1226700		MD15G1042800	40.1833	62.1	90.3067	66.7767
				MD12G1262800	MD01G1161300	MD01G1153400		MD12G1262800	8.55667	3.20333	3.22333	3.76333
				MD11G1241700	MD08G1092600	MD12G1153900		MD11G1241700	14.3033	27.0167	39.31	48.9867
				MD03G1231600	MD05G1354000	MD06G1009800		MD03G1231600	4.65	8.10333	11.7767	10.37
				MD00G1038300	MD00G1140000	MD07G1268700		MD00G1038300	0.646667	0.236667	0.356667	0.306667
				MD16G1056400	MD00G1009000	MD11G1227900		MD16G1056400	0.91	0.333333	0.303333	0.51
				MD05G1074200	MD03G1256000	MD04G1064200		MD05G1074200	5.71333	2.15	1.95333	2.32333
				MD11G1246800	MD08G1028600	MD17G1106400		MD11G1246800	11603.9	17379.1	25158.6	17188.5
				MD15G1433000	MD11G1272300	MD13G1210400		MD15G1433000	3.53	1.32667	1.07333	1.46333
				MD03G1051000	MD08G1236800	MD06G1226800		MD03G1051000	26.83	10.2033	6.43333	3.18667
				MD15G1065400	MD09G1221600	MD15G1023100		MD15G1065400	9.61333	3.64	4.16	3.31
				MD03G1132200	MD11G1108700	MD16G1108700		MD03G1132200	6.43	12.06	17.4133	12.63
				MD11G1062800	MD14G1215700	MD11G1200400		MD11G1062800	0.716667	1.29667	1.86	2.09667
				MD00G1032400	MD07G1203700	MD00G1116600		MD00G1032400	6.65	12.7867	18.3767	19.6533
				MD08G1030400	MD06G1012300	MD06G1046300		MD08G1030400	2.94667	1.11333	0.823333	0.326667
				MD12G1132100	MD06G1203400	MD15G1020000		MD12G1132100	1.07	0.403333	0.27	0.18
				MD10G1302000	MD06G1054800	MD06G1105500		MD10G1302000	3.21	1.20333	1.05667	0.81
				MD12G1202400	MD17G1113400	MD07G1051800		MD12G1202400	4.01	2.08	2.99333	1.86333
				MD10G1138000	MD08G1061900	MD05G1178100		MD10G1138000	0.81	0.31	0.36	0.236667
				MD01G1145500	MD16G1174800	MD10G1333200		MD01G1145500	24.38	9.44	8.09333	10.6067
				MD03G1046500	MD17G1077800	MD06G1134100		MD03G1046500	8.6	12.6367	18.0833	19.5267
				MD01G1118300	MD10G1310600	MD11G1298900		MD01G1118300	4.67333	1.79667	1.23667	1.25
				MD15G1048900	MD12G1165400	MD08G1005500		MD15G1048900	4.03	1.57333	1.46333	1.72667
				MD05G1309500	MD04G1212100	MD02G1155000		MD05G1309500	6.94333	11.2133	16.07	13.8167
				MD15G1409200	MD17G1078100	MD11G1189000		MD15G1409200	3.62667	6.61667	9.47	10.1867
				MD07G1273000	MD03G1161500	MD10G1050200		MD07G1273000	15.3933	6.01333	4.94	4.80333
				MD17G1267000	MD02G1192600	MD16G1064200		MD17G1267000	40.4133	59.0267	84.16	68.2033
				MD11G1079700	MD01G1161700	MD13G1086700		MD11G1079700	58.9633	88.5567	125.77	89.5333
				MD07G1298900	MD05G1074600	MD17G1148400		MD07G1298900	12.75	22.6467	32.14	35.5667
				MD12G1055400	MD15G1303500	MD14G1002500		MD12G1055400	19.7867	28.84	40.93	33.4533
				MD10G1054900	MD15G1012500	MD15G1273300		MD10G1054900	10.6233	16.4133	23.2133	21.0433
				MD06G1055000	MD02G1013800	MD15G1153500		MD06G1055000	1.11	1.98333	2.8	3.65667
				MD16G1043200	MD16G1129900	MD11G1241700		MD16G1043200	6.29	3.74333	5.31667	5.39667
				MD08G1234400	MD04G1020100	MD16G1043700		MD08G1234400	8.45	13.7233	19.3167	20.6133
				MD07G1295600	MD14G1176400	MD17G1048300		MD07G1295600	2.16667	0.85	0.656667	0.5
				MD01G1087300	MD10G1120200	MD13G1174500		MD01G1087300	1.48333	0.83	1.17333	1.15667
				MD15G1083400	MD02G1118000	MD08G1038900		MD15G1083400	42.61	72.7633	102.387	92.86
				MD05G1274700	MD05G1107800	MD05G1069700		MD05G1274700	9.53667	3.74333	2.84333	2.53667
				MD10G1042000	MD16G1157000	MD09G1184000		MD10G1042000	2.73	1.34667	1.89	1.58
				MD09G1286700	MD02G1152200	MD03G1051000		MD09G1286700	9.99333	15.53	21.73	20.7633
				MD05G1074000	MD15G1139800	MD05G1010400		MD05G1074000	7.7	3.02667	2.27333	2.17333
				MD01G1085900	MD17G1067900	MD14G1004000		MD01G1085900	10.22	16.3067	22.78	25.4433
				MD11G1286200	MD03G1227300	MD14G1038200		MD11G1286200	1.73333	0.676667	0.313333	0.473333
				MD10G1261900	MD00G1183000	MD03G1198900		MD10G1261900	1.27	2.02333	2.8	2.62
				MD05G1163800	MD17G1240300	MD00G1032400		MD05G1163800	5.10333	7.98	11.0733	10.48
				MD13G1255400	MD08G1107900	MD13G1231900		MD13G1255400	1.45333	0.573333	0.41	0.266667
				MD01G1177400	MD08G1032900	MD03G1046500		MD01G1177400	5.61	9.86667	13.65	13.2133
				MD15G1211500	MD00G1024500	MD07G1184000		MD15G1211500	142.63	209.187	289.753	226.527
				MD13G1092100	MD03G1121600	MD01G1177200		MD13G1092100	9.55333	16.24	22.4667	22.2633
				MD04G1187600	MD15G1393900	MD15G1409200		MD04G1187600	2.00333	0.786667	0.376667	0.243333
				MD08G1124100	MD17G1154000	MD04G1018400		MD08G1124100	3.65667	6.25667	8.62	9.19
				MD03G1070100	MD15G1360600	MD02G1300300		MD03G1070100	5.93333	8.83333	12.1733	11.0233
				MD05G1336200	MD09G1275500	MD15G1104100		MD05G1336200	202.657	373.323	514.86	515.303
				MD15G1407700	MD17G1128600	MD07G1298900		MD15G1407700	2.98667	1.19	1.54333	1.07
				MD02G1069100	MD16G1145300	MD07G1077900		MD02G1069100	15.9067	6.32	4.88667	5.42333
				MD05G1256500	MD00G1015800	MD16G1117500		MD05G1256500	2.84	4.68	6.44667	7.74
				MD04G1185100	MD08G1210400	MD15G1287300		MD04G1185100	2.61333	4.45667	6.14	9.44
				MD08G1243000	MD10G1186000	MD02G1312100		MD08G1243000	10.06	3.99	2.78667	3.08667
				MD01G1051300	MD17G1027400	MD00G1165100		MD01G1051300	0.62	1.21333	1.67667	1.4
				MD01G1080900	MD12G1119900	MD14G1044500		MD01G1080900	17.2	6.84667	6.25667	6.79
				MD13G1042200	MD00G1046700	MD06G1055000		MD13G1042200	2.66667	4.1	5.65333	6.51333
				MD11G1042600	MD15G1023100	MD03G1183400		MD11G1042600	2.58667	3.83667	5.26	5.58667
				MD00G1186700	MD04G1138500	MD06G1103400		MD00G1186700	2.58667	1.02	2.02333	0.493333
				MD05G1062900	MD07G1244600	MD17G1189400		MD05G1062900	1.71	0.683333	0.39	0.596667
				MD10G1088100	MD08G1248200	MD08G1234400		MD10G1088100	114.57	57.9633	79.5533	99.8467
				MD05G1325700	MD00G1192900	MD02G1180400		MD05G1325700	3.45667	1.38667	1.2	1.42
				MD01G1222500	MD08G1112700	MD00G1115700		MD01G1222500	16.75	10.6167	14.5267	10.2467
				MD03G1173700	MD06G1043900	MD09G1276300		MD03G1173700	44.3367	72.1933	98.4633	106.983
				MD09G1267600	MD06G1128500	MD17G1075600		MD09G1267600	21.7367	8.73333	8.19333	10.77
				MD06G1215800	MD15G1381800	MD01G1085900		MD06G1215800	7.39	12.3333	16.82	16.71
				MD11G1108300	MD15G1252900	MD16G1131300		MD11G1108300	22.4033	39.6733	54.1033	49.7367
				MD08G1216400	MD02G1159300	MD14G1239500		MD08G1216400	3.20667	1.3	0.986667	0.686667
				MD13G1146900	MD15G1245900	MD12G1147300		MD13G1146900	1.05	0.423333	0.323333	0.146667
				MD03G1165700	MD16G1270700	MD07G1060000		MD03G1165700	1.48	2.49	3.39	5.74667
				MD07G1264500	MD17G1156800	MD10G1292500		MD07G1264500	6.97	10.4	14.14	14.4333
				MD13G1113100	MD16G1056200	MD10G1108800		MD13G1113100	4.25	1.73333	2.12333	1.98667
				MD01G1141300	MD02G1298200	MD01G1140200		MD01G1141300	12.3367	23.8333	32.3033	27.0333
				MD17G1268900	MD08G1027400	MD15G1257500		MD17G1268900	2.23333	1.16667	1.58333	0.87
				MD11G1246000	MD15G1388600	MD04G1187600		MD11G1246000	46.98	19.2433	19.3367	20.7067
				MD11G1074400	MD00G1161300	MD08G1124100		MD11G1074400	129.213	52.8967	36.3267	25.8
				MD01G1155000	MD03G1044500	MD16G1238400		MD01G1155000	7.17333	12.6967	17.05	13.3733
				MD15G1373900	MD05G1246500	MD05G1256500		MD15G1373900	20.8333	30.3933	40.8133	50.65
				MD17G1263400	MD13G1010700	MD04G1185100		MD17G1263400	4.49333	7.79333	10.4633	11.3433
				MD05G1000500	MD08G1023700	MD08G1186700		MD05G1000500	244.913	431.023	578.557	636.397
				MD08G1181000	MD16G1001800	MD04G1058200		MD08G1181000	1.85333	0.766667	0.776667	1.04333
				MD10G1190400	MD15G1168500	MD13G1042200		MD10G1190400	0.983333	0.403333	0.563333	0.496667
				MD12G1072900	MD17G1222500	MD11G1042600		MD12G1072900	0.663333	0.276667	0.22	0.103333
				MD15G1401300	MD16G1145600	MD10G1088100		MD15G1401300	177.383	73.4433	43.2433	44.9367
				MD15G1233400	MD05G1344300	MD01G1174400		MD15G1233400	3.53667	5.63	7.47667	8.10333
				MD14G1020100	MD08G1066400	MD14G1005700		MD14G1020100	9.89	4.08	4.32	3.74333
				MD08G1095900	MD15G1325900	MD13G1230800		MD08G1095900	21.0433	8.74333	11.47	13.9833
				MD03G1083100	MD09G1142300	MD03G1173700		MD03G1083100	18.42	32.0533	42.53	40.1767
				MD09G1253000	MD15G1266500	MD13G1231400		MD09G1253000	2.49333	4.55667	6.03333	6.14
				MD08G1102600	MD16G1027000	MD11G1113800		MD08G1102600	4.29	7.06333	9.36	11.79
				MD16G1050300	MD02G1145800	MD07G1292700		MD16G1050300	0.896667	0.456667	0.61	0.39
				MD14G1227500	MD12G1259500	MD13G1146900		MD14G1227500	6.69	3.35667	4.48667	5.00667
				MD09G1252100	MD01G1079200	MD03G1165700		MD09G1252100	754.717	1219.9	1616.73	1378.72
				MD06G1209900	MD10G1295000	MD05G1106800		MD06G1209900	2.39333	0.983333	0.8	1.01333
				MD08G1205500	MD15G1191800	MD12G1191100		MD08G1205500	11.4367	17.2967	22.9467	24.1167
				MD04G1070300	MD06G1226800	MD14G1177900		MD04G1070300	312.057	130.537	107.97	64.5033
				MD14G1085300	MD09G1075600	MD01G1199000		MD14G1085300	280.11	419.747	555.31	600.343
				MD09G1039900	MD10G1251400	MD12G1223900		MD09G1039900	37.1433	61.24	80.9833	77.32
				MD01G1145600	MD17G1066300	MD15G1067100		MD01G1145600	37.3767	15.6533	13.41	18.8533
				MD07G1184800	MD12G1058400	MD15G1353800		MD07G1184800	10.72	15.7633	20.7767	20.48
				MD07G1253900	MD03G1277900	MD14G1238700		MD07G1253900	131.023	55.1167	46.1167	54.0333
				MD10G1339800	MD06G1127200	MD16G1079400		MD10G1339800	3.41333	5.10667	6.73333	6.37667
				MD09G1120600	MD05G1257000	MD09G1117300		MD09G1120600	1.20667	2.29667	3.03333	3.63
				MD03G1282700	MD11G1268400	MD02G1062900		MD03G1282700	175.573	265.457	350.44	315.917
				MD03G1143600	MD13G1049800	MD12G1218200		MD03G1143600	10.1867	4.28	3.58333	2.89
				MD16G1009000	MD14G1001600	MD08G1218900		MD16G1009000	3.51	6.66	8.74333	4.72667
				MD07G1091500	MD02G1282000	MD15G1373900		MD07G1091500	2.68	1.11333	0.616667	0.546667
				MD12G1059100	MD06G1009800	MD01G1140100		MD12G1059100	6.99667	2.95667	2	2.10667
				MD05G1113000	MD01G1153400	MD17G1263400		MD05G1113000	7.45	3.15667	2.02333	2.36
				MD05G1197900	MD05G1000700	MD05G1000500		MD05G1197900	48.3833	92.9367	120.91	108.563
				MD05G1254200	MD13G1116100	MD02G1175800		MD05G1254200	33.12	48.96	63.5667	58.28
				MD02G1150100	MD14G1002500	MD07G1203100		MD02G1150100	11.2933	4.8	4.08667	3.10333
				MD05G1163900	MD15G1394300	MD15G1407600		MD05G1163900	18.22	7.75333	5.56333	6.69333
				MD08G1087700	MD12G1264200	MD05G1363600		MD08G1087700	14.51	8.46333	11	10.6267
				MD08G1007200	MD06G1044100	MD08G1095900		MD08G1007200	713.72	1161.22	1506.77	1506.76
				MD00G1089100	MD15G1012300	MD08G1028100		MD00G1089100	56.6867	91.61	118.717	85.7667
				MD08G1151300	MD15G1279200	MD02G1127400		MD08G1151300	2.31333	0.993333	1.21333	1.37333
				MD00G1109700	MD02G1319100	MD17G1137300		MD00G1109700	319.4	564.75	731.6	554.353
				MD17G1001000	MD15G1019700	MD00G1192900		MD17G1001000	15.3133	23.15	29.9067	28.2067
				MD15G1057800	MD05G1261100	MD04G1011700		MD15G1057800	33.9333	14.47	11.2233	7.74333
				MD13G1119000	MD13G1097000	MD03G1288700		MD13G1119000	6.55	4.15	5.34	5.77667
				MD04G1111400	MD14G1184100	MD08G1102600		MD04G1111400	303.027	129.383	106.51	80.2667
				MD14G1122900	MD06G1135400	MD02G1026200		MD14G1122900	5.92333	9.78	12.6	14.8667
				MD08G1141800	MD02G1306200	MD04G1070300		MD08G1141800	1.85333	0.79	0.77	0.756667
				MD08G1009200	MD03G1211900	MD14G1162400		MD08G1009200	2.89333	1.24	0.966667	0.653333
				MD03G1091100	MD07G1261100	MD05G1320600		MD03G1091100	22.2833	43.09	55.7733	66.6567
				MD15G1189400	MD00G1093400	MD04G1069300		MD15G1189400	6.52333	2.79667	2.27333	1.97333
				MD16G1060400	MD05G1180500	MD09G1035000		MD16G1060400	1.36	0.586667	0.49	0.573333
				MD17G1163600	MD10G1223800	MD03G1238700		MD17G1163600	20.0567	8.7	5.75	4.99
				MD05G1011900	MD03G1001300	MD09G1120600		MD05G1011900	114.713	175.217	224.02	173.997
				MD14G1153300	MD12G1042100	MD12G1001900		MD14G1153300	2.70667	1.16667	0.62	0.256667
				MD07G1140300	MD12G1041400	MD03G1021800		MD07G1140300	8.55333	5.29	6.74	6.49333
				MD14G1061500	MD09G1250300	MD03G1157200		MD14G1061500	11.85	22.8167	29.1733	30.9667
				MD02G1255400	MD03G1146300	MD14G1079900		MD02G1255400	394.42	599.887	767.583	792.093
				MD01G1050900	MD16G1050800	MD05G1220500		MD01G1050900	13.1767	22.6	28.8667	26.9833
				MD10G1312100	MD07G1246100	MD03G1254900		MD10G1312100	5.37333	8.03333	10.22	9.77
				MD11G1284300	MD07G1246200	MD17G1240700		MD11G1284300	3.02333	1.31667	1.26	0.893333
				MD10G1278300	MD12G1153900	MD16G1265900		MD10G1278300	8.69	3.77333	3.41333	4.08
				MD12G1212000	MD10G1334500	MD17G1212300		MD12G1212000	42.73	62.4567	79.65	67.2033
				MD11G1191100	MD13G1014200	MD15G1360000		MD11G1191100	4.69333	8.24667	10.5	11.3867
				MD16G1072500	MD07G1292700	MD01G1213300		MD16G1072500	1.62667	0.696667	0.426667	0.213333
				MD17G1287600	MD12G1001900	MD00G1051500		MD17G1287600	13.17	5.73333	4.44333	4.70667
				MD16G1169000	MD00G1024400	MD15G1024100		MD16G1169000	12.06	20.71	26.29	22.35
				MD02G1016700	MD07G1240700	MD13G1161100		MD02G1016700	13.35	21.0267	26.6733	31.17
				MD17G1019200	MD07G1189600	MD10G1266100		MD17G1019200	107.617	62.7933	79.74	79.1
				MD00G1103100	MD08G1022400	MD07G1228300		MD00G1103100	81.62	132.897	168.483	164.8
				MD09G1005800	MD10G1333200	MD07G1308000		MD09G1005800	20.26	8.81667	8.55333	8.73333
				MD10G1325900	MD07G1153300	MD02G1069500		MD10G1325900	21.79	33.6967	42.7833	44.07
				MD13G1060700	MD03G1181400	MD15G1057800		MD13G1060700	23.0733	34.6433	43.9033	44.05
				MD13G1092200	MD00G1176400	MD09G1054700		MD13G1092200	79.1233	117.42	148.71	160.743
				MD05G1115700	MD05G1226500	MD14G1122900		MD05G1115700	73.5833	123.08	155.64	184.237
				MD07G1008600	MD11G1024000	MD14G1147900		MD07G1008600	87.9667	132.31	167.41	182.457
				MD03G1166600	MD17G1035400	MD08G1009200		MD03G1166600	20.8267	13.1967	16.7167	14.3433
				MD12G1012100	MD03G1246400	MD08G1050600		MD12G1012100	0.846667	0.373333	0.32	0.353333
				MD12G1063900	MD15G1415200	MD05G1094500		MD12G1063900	0.59	1.06333	1.34333	2.02333
				MD13G1122500	MD08G1001300	MD11G1207500		MD13G1122500	2.20667	3.99	5.02	6.45
				MD10G1320900	MD15G1090700	MD10G1123500		MD10G1320900	47.4733	78.2567	98.7133	95.73
				MD03G1095200	MD14G1041300	MD17G1163600		MD03G1095200	7.39	3.21667	2.71667	3.9
				MD06G1031800	MD05G1320800	MD14G1153300		MD06G1031800	27.6833	45.4167	57.26	49.9333
				MD07G1261900	MD15G1343500	MD14G1151700		MD07G1261900	59.44	36.3467	45.9133	52.4533
				MD12G1238600	MD12G1062100	MD03G1134300		MD12G1238600	45.5133	68.7167	86.5467	97.7933
				MD06G1077700	MD02G1013500	MD14G1041200		MD06G1077700	208.323	91.0967	89.7733	85.4
				MD13G1045700	MD14G1133400	MD15G1084100		MD13G1045700	13.1333	5.75667	5.87333	8.44667
				MD11G1316500	MD13G1012600	MD11G1017400		MD11G1316500	1.45667	0.636667	0.483333	0.413333
				MD01G1029200	MD15G1082600	MD08G1050700		MD01G1029200	1.17333	0.506667	0.51	0.563333
				MD01G1077800	MD13G1024300	MD04G1212300		MD01G1077800	12.1667	5.35333	5.66	3.78333
				MD17G1099600	MD15G1125000	MD16G1072500		MD17G1099600	11.9233	5.26333	4.57333	5.29333
				MD07G1309000	MD17G1017000	MD12G1228800		MD07G1309000	13.76	6.09667	5.07667	7.58333
				MD16G1109500	MD07G1056200	MD02G1016700		MD16G1109500	12.43	5.52333	3.55	4.87667
				MD10G1299900	MD07G1184000	MD09G1061000		MD10G1299900	15.1233	6.72	5.54333	4.81667
				MD15G1006300	MD14G1015400	MD03G1292200		MD15G1006300	423.38	697.323	874.663	803.187
				MD00G1125300	MD03G1147100	MD09G1126900		MD00G1125300	3.64667	1.77	2.21333	1.90667
				MD16G1111500	MD15G1021500	MD15G1444700		MD16G1111500	5.85333	2.60667	2.87333	3.60667
				MD05G1122600	MD17G1049600	MD02G1128300		MD05G1122600	22.87	14.7567	18.4933	17.5733
				MD13G1173100	MD10G1075200	MD05G1115700		MD13G1173100	12.9067	20.8433	26.0333	23.1767
				MD05G1303500		MD12G1063900		MD05G1303500	2.78	1.23333	1.18667	1.70667
				MD07G1306900		MD09G1162900		MD07G1306900	164.613	73.29	59.4767	65.0567
				MD15G1328100		MD13G1189100		MD15G1328100	39.8267	61.3667	76.5967	90.9733
				MD13G1263800		MD05G1028500		MD13G1263800	9.48	14.3033	17.8533	21.54
				MD01G1133700		MD13G1045700		MD01G1133700	2.78	4.62667	5.76333	5.07667
				MD09G1045700		MD02G1316800		MD09G1045700	3.09667	1.37667	1.16	1.11667
				MD12G1244500		MD17G1139500		MD12G1244500	5.40333	2.73	3.41667	3.02
				MD03G1173300		MD02G1198700		MD03G1173300	33.0833	56.0967	69.68	74.7233
				MD03G1004300		MD11G1020900		MD03G1004300	30.83	46.62	57.9633	53.8433
				MD10G1211100		MD17G1239600		MD10G1211100	5.74333	2.57333	2.28667	1.88667
				MD08G1185500		MD13G1179600		MD08G1185500	37.4967	16.7433	16.3567	9.79
				MD03G1188800		MD15G1084200		MD03G1188800	19.94	8.9	7.50333	7.92667
				MD05G1103100		MD15G1328100		MD05G1103100	14.2	6.33667	5.32333	4.50333
				MD01G1087900		MD13G1263800		MD01G1087900	2.71333	1.20333	1.04333	0.97
				MD01G1226600		MD17G1272400		MD01G1226600	17.94	9.10333	11.3233	7.52667
				MD15G1401800		MD14G1228100		MD15G1401800	39.6733	17.7367	11.4633	10.4067
				MD01G1099600		MD17G1058100		MD01G1099600	2.83333	4.68667	5.79667	5.57333
				MD16G1063300		MD15G1348800		MD16G1063300	2.81333	5.24333	6.49	9.66667
				MD06G1116800		MD08G1185500		MD06G1116800	2.88667	1.28667	0.87	1.32
				MD08G1010600		MD05G1082200		MD08G1010600	4.52	7.47667	9.23333	9.14667
				MD03G1200900		MD13G1070200		MD03G1200900	9.47667	14.62	18.04	22.1767
				MD03G1143100		MD15G1401800		MD03G1143100	8.64667	3.88333	4.17333	3.77333
				MD08G1196500		MD16G1063300		MD08G1196500	4.75	7.1	8.76333	8.89
				MD13G1251000		MD10G1080000		MD13G1251000	2.19333	3.87	4.78333	4.62667
				MD01G1121300		MD09G1217300		MD01G1121300	24.28	37.2733	45.91	45.1067
				MD10G1110200		MD01G1162100		MD10G1110200	3.02	5.49667	6.77667	7.03667
				MD02G1025500		MD06G1100000		MD02G1025500	3.47333	6.03667	7.43	10.46
				MD04G1191200		MD03G1200900		MD04G1191200	7.49667	12.1533	14.9267	14.59
				MD03G1037700		MD15G1343900		MD03G1037700	42.5533	70.6633	86.77	100.983
				MD05G1246400		MD13G1012600		MD05G1246400	5.42	2.45	2.25333	1.72667
				MD15G1170900		MD02G1025500		MD15G1170900	20.3	31.55	38.7567	42.6633
				MD16G1136100		MD14G1070300		MD16G1136100	9.49333	15.7767	19.35	19.59
				MD02G1226200		MD07G1198700		MD02G1226200	6.00333	2.75	3.25333	3.29667
				MD08G1103200		MD14G1153600		MD08G1103200	3.13667	5.71667	7.01667	7.58333
				MD15G1426600		MD05G1294300		MD15G1426600	46.37	71.3533	87.6267	75.2167
				MD10G1198400		MD09G1098900		MD10G1198400	188.477	86.2433	67.2733	55.3767
				MD11G1036900		MD04G1137400		MD11G1036900	5.24667	9.21333	11.26	10.5933
				MD12G1246300		MD12G1136700		MD12G1246300	33.78	15.4633	21.34	22.1067
				MD14G1153600		MD08G1031300		MD14G1153600	24.5833	45.1967	55.02	69.01
				MD03G1042800		MD17G1286800		MD03G1042800	202.223	298.76	364.747	312.623
				MD10G1238800		MD13G1042500		MD10G1238800	81.8733	129.08	157.497	155.77
				MD12G1029300		MD15G1149900		MD12G1029300	13.3133	20.8767	25.41	22.4133
				MD16G1007900		MD07G1053100		MD16G1007900	1.04667	1.95667	2.37	1.85333
				MD06G1079100		MD08G1063800		MD06G1079100	8.99	16.9033	20.6067	22.94
				MD07G1164200		MD12G1099800		MD07G1164200	2.92	5.66667	6.9	5.77
				MD06G1072200		MD04G1060700		MD06G1072200	4.22	1.91667	1.54	1.23
				MD07G1064400		MD06G1052700		MD07G1064400	22.3633	34.6233	42.14	39.6833
				MD04G1197500		MD15G1324500		MD04G1197500	15.8567	7.30667	7.74333	7.65667
				MD03G1020200		MD08G1101700		MD03G1020200	23.6967	10.9067	10.8733	9.4
				MD04G1195800		MD15G1091000		MD04G1195800	11.25	5.18667	3.62667	4.36667
				MD13G1064900		MD12G1037000		MD13G1064900	38.89	17.9267	14.19	18.6433
				MD01G1004300		MD08G1080600		MD01G1004300	90.2667	173.527	210.897	210.35
				MD12G1229200		MD13G1033600		MD12G1229200	2.34667	1.08	0.866667	0.87
				MD10G1142200		MD11G1192000		MD10G1142200	6.42667	3.55333	4.32	3.14333
				MD05G1173700		MD15G1349000		MD05G1173700	12.4367	21.23	25.8333	18.1867
				MD17G1009100		MD13G1029700		MD17G1009100	8.76333	5.20333	6.38	5.56
				MD08G1220900		MD15G1215500		MD08G1220900	68.6867	100.58	121.863	93.91
				MD02G1082200		MD12G1245900		MD02G1082200	44.5	27.9967	33.9967	25.33
				MD07G1201600		MD07G1270900		MD07G1201600	2.73	1.37667	1.67667	1.95333
				MD01G1136700		MD02G1099800		MD01G1136700	16.5	9.67667	11.7333	12.7367
				MD11G1256600		MD13G1087900		MD11G1256600	9.02667	13.53	16.36	18.16
				MD07G1053100		MD01G1195200		MD07G1053100	4.24333	1.94667	1.64667	1.12667
				MD08G1063800		MD10G1065900		MD08G1063800	121.403	56.2033	45.9267	31.7267
				MD06G1051800		MD09G1142500		MD06G1051800	11.7667	7.38333	8.88667	8.90333
				MD00G1004900		MD16G1081800		MD00G1004900	4.62	7.47333	9.00667	8.95667
				MD14G1210700		MD03G1053200		MD14G1210700	79.3267	36.9267	38.7367	60.3733
				MD16G1061000		MD16G1165000		MD16G1061000	28.3333	13.2433	12.7867	13.5733
				MD02G1018000		MD11G1242900		MD02G1018000	12.9267	23.9	28.6267	27.6033
				MD01G1074400		MD01G1124500		MD01G1074400	134.1	225.517	270.66	277.793
				MD02G1021100		MD01G1185500		MD02G1021100	40.6233	19.9567	23.9667	19.6633
				MD15G1091000		MD15G1443100		MD15G1091000	5.96667	10.15	12.1867	14.84
				MD05G1312700		MD14G1203000		MD05G1312700	21.8333	10.2167	8.3	7.48
				MD13G1163300		MD14G1223700		MD13G1163300	60.16	28.24	23.6067	21.7467
				MD15G1072600		MD04G1059200		MD15G1072600	14.3167	7.64	9.07333	9.08333
				MD16G1118100		MD05G1143000		MD16G1118100	13.9333	23.7433	28.26	26.1967
				MD11G1282500		MD01G1188500		MD11G1282500	9.52667	4.48	4.61	4.21333
				MD11G1236900		MD15G1170100		MD11G1236900	81.82	126.673	150.36	131.477
				MD17G1000900		MD13G1209700		MD17G1000900	0.806667	1.57667	1.86667	1.18
				MD13G1131200		MD09G1291500		MD13G1131200	6.54667	9.63	11.43	9.08333
				MD03G1222700		MD11G1070800		MD03G1222700	34.37	16.1567	16.7567	14.58
				MD10G1306600		MD15G1015100		MD10G1306600	3.59667	1.69667	1.29	1.27
				MD17G1224900		MD17G1107200		MD17G1224900	72.4367	34.2467	30.8633	35.68
				MD09G1099500		MD12G1125800		MD09G1099500	18.5	31.54	37.2667	29.0333
				MD01G1195200		MD15G1438300		MD01G1195200	11.0967	5.74	6.77667	10.0067
				MD14G1202000		MD05G1103600		MD14G1202000	232.723	371.937	438.987	457.413
				MD00G1072500		MD17G1045300		MD00G1072500	9.21333	4.34667	4.4	4.72333
				MD03G1273300		MD12G1022200		MD03G1273300	18.2367	11.54	13.66	12.9333
				MD06G1036600		MD11G1250400		MD06G1036600	22.83	13.7833	16.3067	17.5433
				MD10G1045400		MD05G1171900		MD10G1045400	2.2	1.04	0.93	1.00667
				MD07G1160900		MD11G1294000		MD07G1160900	231.537	416.097	490.187	521.763
				MD09G1142500		MD17G1066700		MD09G1142500	50.7867	24.05	17.1767	12.1133
				MD08G1004500		MD11G1123900		MD08G1004500	1688.37	1010.67	1192.74	1083.42
				MD16G1081800		MD06G1008700		MD16G1081800	2.51667	1.19	1.04333	0.686667
				MD17G1009900		MD12G1199000		MD17G1009900	84.0067	39.7833	29.85	30.9833
				MD14G1124200		MD15G1372600		MD14G1124200	9.25333	4.38333	2.98333	4.32333
				MD02G1095600		MD12G1233500		MD02G1095600	48.9933	71.9233	84.5333	88.8167
				MD09G1211700		MD15G1266500		MD09G1211700	8.65	5.14667	6.03333	5.24667
				MD08G1190800		MD17G1066000		MD08G1190800	17.4667	8.33	8.70667	6.84667
				MD03G1053200		MD17G1104000		MD03G1053200	3.16	4.98333	5.87667	7.96333
				MD02G1107600		MD16G1018100		MD02G1107600	7.32667	11.2767	13.22	15.04
				MD13G1028100		MD17G1209200		MD13G1028100	26.0967	15.9533	18.7767	16.4333
				MD14G1123200		MD15G1260000		MD14G1123200	553.48	964.357	1131.22	949.383
				MD00G1187100		MD04G1204600		MD00G1187100	34.6267	16.5033	18.0833	14.25
				MD01G1124500		MD05G1360500		MD01G1124500	9.98333	15.9833	18.6267	24.9733
				MD15G1443100		MD00G1111500		MD15G1443100	11.6133	5.54	3.57667	3.36667
				MD09G1202600		MD15G1329500		MD09G1202600	253.013	145.517	169.743	203.37
				MD14G1203000		MD12G1103600		MD14G1203000	5.18333	2.48667	1.77	0.973333
				MD15G1318800		MD10G1274200		MD15G1318800	49.6267	31.23	36.4433	27.8
				MD13G1000200		MD06G1209100		MD13G1000200	47.9367	72.3467	83.8733	85.63
				MD09G1123200		MD06G1131600		MD09G1123200	6.05333	9.82667	11.3933	9.01
				MD11G1316800		MD12G1231600		MD11G1316800	2.73	1.30667	1.14667	0.94
				MD14G1196200		MD07G1239000		MD14G1196200	23.0467	34.0733	39.6067	31.2967
				MD17G1243900		MD14G1223600		MD17G1243900	15.69	23.6667	27.4933	29.38
				MD00G1125900		MD15G1136400		MD00G1125900	1.23667	1.94333	2.26	2.33333
				MD15G1199200		MD15G1390700		MD15G1199200	6.43333	10.7833	12.45	9.35333
				MD16G1057000		MD06G1118700		MD16G1057000	20.76	36.16	41.92	41.1967
				MD14G1193100		MD02G1079200		MD14G1193100	35.88	17.15	15.9367	15.3433
				MD04G1164600		MD12G1194700		MD04G1164600	9.83333	17.86	20.63	22.1633
				MD04G1059200		MD08G1001300		MD04G1059200	1.06667	1.93	2.23	3.24333
				MD11G1166600		MD03G1233100		MD11G1166600	4.69333	7.22	8.37667	7.24333
				MD01G1188500		MD06G1170200		MD01G1188500	1.96	2.97	3.44333	4.70333
				MD16G1118400		MD11G1103100		MD16G1118400	3.57	6.06	7.07	7.76667
				MD17G1114400		MD14G1242900		MD17G1114400	5.41667	10.17	11.76	13.4133
				MD00G1140300		MD05G1312200		MD00G1140300	3.45667	1.64333	1.36333	1.47
				MD16G1075200		MD00G1061700		MD16G1075200	64.5367	94.56	109.267	87.5367
				MD03G1242000		MD13G1285100		MD03G1242000	1.59	0.766667	0.53	1.11667
				MD00G1186900		MD06G1104100		MD00G1186900	72.7533	38.8867	44.87	51.54
				MD15G1236100		MD06G1079300		MD15G1236100	27.1567	13.65	15.7833	14.39
				MD15G1075800		MD02G1061100		MD15G1075800	20.8033	9.99	14.92	12.2367
				MD11G1229700		MD15G1400400		MD11G1229700	14.82	7.09667	6.61	6.33
				MD06G1068000		MD03G1294300		MD06G1068000	19.2267	33.7533	38.7367	34.9633
				MD09G1121100		MD15G1059100		MD09G1121100	3.62333	5.33333	6.13333	6.52667
				MD06G1010300		MD07G1153200		MD06G1010300	13.7167	20.7433	23.7833	22.9633
				MD01G1208700		MD10G1077100		MD01G1208700	1.05	0.536667	0.613333	0.443333
				MD13G1009500		MD09G1115100		MD13G1009500	5.04333	2.41667	1.95	2.2
				MD01G1175600		MD15G1348900		MD01G1175600	31.3367	56.4	64.5933	71.4067
				MD00G1038700		MD12G1012300		MD00G1038700	6.84	3.29667	2.16	2.53667
				MD13G1111300		MD05G1226500		MD13G1111300	112.847	64.93	74.29	85.52
				MD12G1022200		MD17G1030100		MD12G1022200	4.73667	7.97333	9.12333	12.4267
				MD15G1407300		MD04G1204500		MD15G1407300	17.6067	10.1233	11.5433	13.6933
				MD05G1242300		MD11G1287900		MD05G1242300	64.7667	31.1967	37.08	21.95
				MD02G1187800		MD11G1007900		MD02G1187800	8.36667	4.03667	3.57667	3.98333
				MD15G1372900		MD14G1001600		MD15G1372900	13.6167	6.55333	6.23333	5.98667
				MD11G1213500		MD13G1202800		MD11G1213500	5.63667	2.72	2.26333	1.57
				MD05G1171900		MD03G1134800		MD05G1171900	1.50667	2.65	3.01	4.6
				MD13G1213400		MD08G1098100		MD13G1213400	186.17	89.8967	67.66	76.8333
				MD07G1204500		MD15G1153000		MD07G1204500	1.31	2.21333	2.51333	2.98667
				MD02G1048100		MD03G1213800		MD02G1048100	165.277	242.163	274.973	219.93
				MD12G1183000		MD09G1255700		MD12G1183000	9.21667	16.8533	19.1067	16.71
				MD00G1161000		MD06G1105900		MD00G1161000	2.13667	3.50667	3.99	4.07
				MD12G1027700		MD16G1230700		MD12G1027700	7.14667	4.42	5.02667	6.11333
				MD15G1241400		MD11G1256900		MD15G1241400	2.37333	1.39667	1.58333	1.67667
				MD15G1264900		MD16G1050500		MD15G1264900	25.7633	46.97	53.13	39.05
				MD09G1195300		MD05G1335600		MD09G1195300	249.757	120.89	106.49	81.4367
				MD00G1102700		MD11G1109200		MD00G1102700	151.94	73.6467	87.07	77.66
				MD12G1199000		MD02G1166700		MD12G1199000	0.926667	1.6	1.80333	2.82667
				MD10G1073500		MD16G1044000		MD10G1073500	327.85	204.953	231.157	285.233
				MD07G1296000		MD05G1337400		MD07G1296000	15.75	25.6467	28.8033	28.6167
				MD08G1211500		MD04G1147700		MD08G1211500	4.72667	7.73333	8.69333	7.85
				MD03G1090600		MD14G1070200		MD03G1090600	0.513333	0.993333	0.923333	1.21333
				MD05G1115400		MD09G1029300		MD05G1115400	20.5233	35.4767	39.7267	34.1267
				MD02G1122200		MD03G1146300		MD02G1122200	95.4333	46.87	52.75	50.8633
				MD12G1175200		MD16G1050600		MD12G1175200	5.04333	2.67667	3.03333	2.98333
				MD09G1247900		MD10G1110000		MD09G1247900	5.36667	10.4333	10.8467	11.9567
				MD08G1011600		MD13G1041800		MD08G1011600	30.98	46.59	52.19	60.3067
				MD11G1255300		MD15G1280500		MD11G1255300	89.2367	57.1067	64.0367	52.1667
				MD08G1168600		MD03G1292900		MD08G1168600	161.953	88.2167	98.8867	103.423
				MD10G1265300		MD17G1016400		MD10G1265300	252.493	492.587	540.833	440.023
				MD08G1029600		MD12G1119800		MD08G1029600	11.2067	5.51333	6.19667	5.52667
				MD06G1122000		MD13G1049600		MD06G1122000	1.00667	1.84333	2.06	2.54
				MD06G1089500		MD17G1045600		MD06G1089500	15.7733	8.95333	9.98667	11.47
				MD10G1133400		MD13G1181800		MD10G1133400	2.35333	4.64667	4.90333	5.14333
				MD02G1122400		MD03G1105400		MD02G1122400	50.6667	86.1267	95.9833	102.903
				MD11G1126200		MD05G1167600		MD11G1126200	3.70667	6.40333	7.11333	8.04667
				MD17G1034000		MD09G1194900		MD17G1034000	186.993	366.237	371.39	296.607
				MD04G1028900		MD17G1079700		MD04G1028900	1.44	2.87	2.11667	2.18
				MD12G1120300		MD06G1016500		MD12G1120300	4.53	7.41	8.25667	7.57
				MD15G1260000		MD17G1099200		MD15G1260000	6.55333	12.87	8.15333	3.62667
				MD04G1204600		MD01G1040300		MD04G1204600	0.366667	0.7	0.78	1.30333
				MD10G1089300		MD04G1129800		MD10G1089300	2.15	3.72	4.11667	4.48
				MD11G1289600		MD14G1080000		MD11G1289600	2.81333	4.25	4.72333	5.67333
				MD05G1360500		MD03G1128900		MD05G1360500	3.94667	7.78	11.8367	16.8
				MD15G1172200		MD01G1201900		MD15G1172200	6.23333	3.39	3.74667	2.74333
				MD04G1083900		MD11G1138900		MD04G1083900	1.35667	2.15667	2.37667	3.16
				MD06G1205700		MD16G1092700		MD06G1205700	0.976667	1.91	1.68333	1.85333
				MD17G1212000		MD09G1009100		MD17G1212000	11.4567	22.5467	24.1	22.6233
				MD01G1093700		MD02G1171100		MD01G1093700	4.27333	8.40333	5.87333	5.9
				MD06G1224500		MD11G1141200		MD06G1224500	13.72	20.7967	22.8933	24.6567
				MD00G1111500		MD15G1359900		MD00G1111500	5.62333	11.14	14.5633	16.7
				MD12G1255400		MD05G1321500		MD12G1255400	10.03	6.35333	7.01333	5.41333
				MD14G1172100		MD14G1060500		MD14G1172100	14.8133	9.11333	10.05	7.92333
				MD03G1252100		MD08G1217600		MD03G1252100	14.3533	22.6567	24.91	20.52
				MD11G1279800		MD00G1012200		MD11G1279800	26.8933	17.2167	18.98	17.45
				MD17G1263500		MD08G1133500		MD17G1263500	10.3367	20.4867	23.2967	19.4
				MD14G1069200		MD01G1139700		MD14G1069200	2.92667	5.79667	7.97	8.07667
				MD04G1061200		MD13G1024600		MD04G1061200	6.94333	13.7567	17.65	18.64
				MD16G1000400		MD04G1072900		MD16G1000400	3.43333	5.06333	5.54667	5.28333
				MD05G1033800		MD07G1176400		MD05G1033800	10.1933	5.79	6.37	7.69333
				MD10G1283900		MD11G1108500		MD10G1283900	30.88	19.4867	21.3967	19.87
				MD12G1002500		MD03G1073600		MD12G1002500	9.3	16.1733	17.67	17.9633
				MD17G1100800		MD03G1231800		MD17G1100800	29.3733	58.0067	52.6867	68.3167
				MD13G1166800		MD02G1178300		MD13G1166800	7.65333	14.2067	15.5333	17.3233
				MD11G1082600		MD05G1072500		MD11G1082600	56.2533	104.267	113.647	113.393
				MD06G1131600		MD00G1015500		MD06G1131600	0.556667	1.10333	1.25333	1.96333
				MD05G1298900		MD00G1035800		MD05G1298900	8.23	16.3333	21.7967	20.58
				MD07G1239000		MD13G1136900		MD07G1239000	2.33333	4.35333	4.74667	6.88333
				MD05G1059300		MD07G1034400		MD05G1059300	18.9567	11.4167	12.4833	13.38
				MD11G1022800		MD00G1037100		MD11G1022800	2.16667	3.42	3.72333	4.15667
				MD10G1184500		MD02G1137500		MD10G1184500	37.52	57.6733	62.7	52.8533
				MD13G1079500		MD08G1086300		MD13G1079500	34.5067	19.0033	20.6867	17.9133
				MD08G1041500		MD01G1236300		MD08G1041500	110.287	176.417	191.757	233.303
				MD11G1230800		MD16G1026000		MD11G1230800	0.81	1.65	2.11	2.69333
				MD13G1203400		MD12G1036700		MD13G1203400	32.4233	17.4133	18.9833	20.5267
				MD01G1168600		MD05G1099400		MD01G1168600	14.5433	9.15333	9.96667	9.98667
				MD09G1032300		MD02G1085100		MD09G1032300	8.19667	14.0433	15.2733	12.9633
				MD16G1132100		MD13G1049500		MD16G1132100	0.843333	1.69667	1.95	2.04
				MD17G1020800		MD15G1355100		MD17G1020800	6.99333	12.0767	13.1033	15.1667
				MD17G1210200		MD16G1259000		MD17G1210200	83.1633	133.31	144.393	168.577
				MD16G1076100		MD01G1006600		MD16G1076100	2.43	4.34	4.7	5.95333
				MD02G1079200		MD04G1147900		MD02G1079200	6.98333	13.8833	16.8467	21.6467
				MD06G1094500		MD15G1282600		MD06G1094500	10.09	18.6133	20.14	20.6333
				MD15G1073200		MD03G1004000		MD15G1073200	38.35	22.3233	24.1733	20.8533
				MD06G1164700		MD15G1120300		MD06G1164700	21.8133	33.4967	36.1533	37.4433
				MD10G1271300		MD14G1235200		MD10G1271300	58.4067	33.7733	36.5667	35.3833
				MD04G1187400		MD17G1022000		MD04G1187400	12.3867	6.87667	7.43333	6.74667
				MD11G1299000		MD16G1253900		MD11G1299000	8.93333	14.5767	15.6933	16.6933
				MD15G1005800		MD13G1118500		MD15G1005800	9.63667	17.2067	18.5167	21.4833
				MD08G1195400		MD14G1001000		MD08G1195400	108.51	215.8	203.033	198.197
				MD15G1337000		MD02G1113800		MD15G1337000	11.0167	17.37	18.6633	18.7367
				MD17G1224600		MD13G1108500		MD17G1224600	105.617	67.6767	72.94	85.21
				MD01G1108500		MD02G1153500		MD01G1108500	83.2267	165.833	199.747	196.027
				MD13G1061900		MD13G1205200		MD13G1061900	30.7433	15.3967	16.5333	15.4867
				MD06G1228000		MD05G1345800		MD06G1228000	3.78	7.56333	8.39	7.51333
				MD08G1220400		MD02G1057200		MD08G1220400	2.69	4.26333	4.57667	3.94333
				MD11G1090600		MD16G1064400		MD11G1090600	39.8467	79.4567	96.37	84.4433
				MD01G1222200		MD01G1237600		MD01G1222200	5.09333	10.1867	14.3767	13.4267
				MD10G1252600		MD09G1126700		MD10G1252600	24.65	12.37	13.29	13.87
				MD02G1054900		MD01G1027200		MD02G1054900	5.75667	2.87	3.09	2.19333
				MD04G1066300		MD14G1233100		MD04G1066300	2.75667	5.47667	5.02	6.92
				MD13G1184800		MD15G1139800		MD13G1184800	0.636667	1.25667	1.25667	1.65333
				MD15G1307200		MD10G1334300		MD15G1307200	268.82	394.73	420.693	457.567
				MD04G1224400		MD09G1257800		MD04G1224400	14.1767	26.1233	27.8067	30.2767
				MD02G1131800		MD00G1069800		MD02G1131800	28.9267	44.24	47.0067	48.2933
				MD06G1195000		MD07G1268200		MD06G1195000	156.15	312.45	335.697	325.083
				MD15G1300000		MD01G1122900		MD15G1300000	32.9967	66.2933	79.7733	42.3267
				MD05G1318900		MD03G1171500		MD05G1318900	7.59667	4.19	4.47667	3.37
				MD03G1118100		MD15G1081300		MD03G1118100	63.0267	34.68	36.83	34.16
				MD06G1170200		MD09G1256300		MD06G1170200	1.35667	2.49667	2.65	4.16667
				MD01G1050800		MD17G1072300		MD01G1050800	15.7233	28.2767	29.9767	32.3133
				MD04G1003000		MD17G1190000		MD04G1003000	272.303	137.327	146.26	196.867
				MD12G1143400		MD05G1034200		MD12G1143400	13.1167	20.6433	21.9067	20.5933
				MD14G1064600		MD03G1026700		MD14G1064600	1.68333	2.74333	2.90667	2.7
				MD12G1241300		MD11G1041800		MD12G1241300	17.94	27.3167	28.9433	26.41
				MD07G1146900		MD13G1150700		MD07G1146900	12.85	20.07	21.3233	21.89
				MD17G1167200		MD04G1126500		MD17G1167200	15.48	25.34	26.88	24.76
				MD15G1230200		MD10G1165600		MD15G1230200	9.68667	14.4167	15.2633	16.91
				MD05G1312200		MD03G1294400		MD05G1312200	0.95	1.91667	2.94667	3.21667
				MD00G1191600		MD04G1112600		MD00G1191600	12.3667	19.3133	20.47	21.78
				MD16G1230600		MD10G1170600		MD16G1230600	4.06	7.85333	8.27	11.43
				MD07G1278900		MD10G1014200		MD07G1278900	12.46	21.9767	23.1967	23.9667
				MD10G1131700		MD04G1100400		MD10G1131700	3.26	1.93333	2.04667	2.06667
				MD10G1179900		MD06G1119300		MD10G1179900	6.03667	2.93333	3.10667	2.77
				MD05G1207800		MD12G1066400		MD05G1207800	0.423333	0.85	0.786667	0.49
				MD00G1061700		MD07G1284200		MD00G1061700	4.23667	8.55	9.78333	14.46
				MD14G1018700		MD10G1035600		MD14G1018700	208.38	131.953	139.583	129.743
				MD12G1198800		MD10G1195400		MD12G1198800	33.7467	21.2533	22.4333	19.92
				MD00G1189100		MD08G1125400		MD00G1189100	0.286667	0.586667	0.4	0.653333
				MD05G1055300		MD17G1202000		MD05G1055300	3.35667	5.14333	5.43333	7.39
				MD08G1006000		MD09G1256000		MD08G1006000	35.74	72.3033	85.2367	89.9
				MD14G1098400		MD01G1213100		MD14G1098400	3.56667	7.31333	7.84667	6.46667
				MD07G1107800		MD10G1196300		MD07G1107800	10.8633	18.8567	19.8967	23.6433
				MD01G1093500		MD08G1048900		MD01G1093500	20.3733	35.5067	37.2233	33.0767
				MD05G1351400		MD13G1041900		MD05G1351400	5.96667	12.06	12.3	14.9067
				MD05G1191000		MD05G1136800		MD05G1191000	36.8667	74.7067	96.36	96.61
				MD08G1107300		MD01G1146800		MD08G1107300	1.58333	3.25	4.17667	3.68
				MD11G1096000		MD09G1116400		MD11G1096000	7.53333	11.1633	11.69	11.65
				MD11G1228200		MD09G1141200		MD11G1228200	2.44333	4.66	4.88	3.42333
				MD13G1070900		MD15G1126600		MD13G1070900	11.7667	23.9233	25.0767	24.3033
				MD15G1189600		MD11G1022500		MD15G1189600	4.92333	7.39667	7.74667	9.2
				MD09G1133900		MD05G1172700		MD09G1133900	43.3033	63.95	67.11	70.33
				MD14G1117100		MD11G1216500		MD14G1117100	4.35667	6.96333	7.32667	8.48667
				MD13G1274600		MD15G1102300		MD13G1274600	2.11333	3.43333	3.63	3.74
				MD01G1123300		MD11G1098100		MD01G1123300	24.38	15.6133	16.42	12.7233
				MD09G1011300		MD14G1066100		MD09G1011300	13.85	21.89	22.8867	21.23
				MD05G1215200		MD10G1035700		MD05G1215200	478.977	970.217	1296.64	1278.55
				MD02G1255300		MD10G1333300		MD02G1255300	40.9533	61.9533	64.7567	72.59
				MD12G1057600		MD02G1141700		MD12G1057600	44.93	67.31	70.3667	81.91
				MD10G1167800		MD04G1187700		MD10G1167800	1.56	2.89667	3.02333	3.28667
				MD02G1085700		MD05G1123700		MD02G1085700	15.14	8.19333	8.56333	7.55
				MD14G1052700		MD07G1135000		MD14G1052700	3.72	6.74	7.02667	7.28
				MD07G1169900		MD17G1061600		MD07G1169900	0.326667	0.603333	0.626667	1.05
				MD13G1134700		MD07G1205300		MD13G1134700	1.38333	2.83333	3.49667	4.44667
				MD14G1037400		MD13G1097000		MD14G1037400	16.82	25.8267	26.87	33.68
				MD12G1174800		MD05G1363200		MD12G1174800	4.28667	8.76	8.74	7.08667
				MD15G1070600		MD11G1099200		MD15G1070600	10.4433	6.30333	6.58	5.72333
				MD13G1180400		MD16G1240400		MD13G1180400	105.85	215.333	245.237	276.917
				MD01G1120300		MD04G1243400		MD01G1120300	616.5	355.953	369.583	349.183
				MD09G1254500		MD00G1018400		MD09G1254500	15.2033	29.1167	30.19	31.91
				MD05G1119500		MD11G1313400		MD05G1119500	3.79333	2.40333	2.51	3.01333
				MD17G1066800		MD11G1304000		MD17G1066800	2.44	3.74333	3.86333	5.30333
				MD13G1021700		MD17G1201600		MD13G1021700	21.2367	38.6367	39.9567	39.3867
				MD02G1061100		MD09G1141700		MD02G1061100	10.96	22.3433	14.01	10.0733
				MD08G1039300		MD15G1044300		MD08G1039300	0.903333	1.83	2.40667	2.94667
				MD12G1167300		MD00G1089600		MD12G1167300	14.4	29.3833	28.9733	34.2767
				MD08G1211700		MD11G1235900		MD08G1211700	9.22667	15.9733	16.4933	12.7533
				MD13G1114900		MD04G1019400		MD13G1114900	4.54667	2.66667	2.76667	3.26333
				MD04G1129500		MD05G1086300		MD04G1129500	4.14667	6.10333	6.31333	7.22
				MD07G1282200		MD02G1168000		MD07G1282200	1.34333	2.78	3.48	4.07333
				MD04G1186600		MD03G1110000		MD04G1186600	20.9233	30.61	31.53	35.8567
				MD03G1294300		MD10G1071200		MD03G1294300	5.67667	11.63	11.5533	17.3967
				MD13G1111700		MD06G1033100		MD13G1111700	2.85333	5.08333	5.22333	5.70667
				MD04G1184900		MD05G1184800		MD04G1184900	0.933333	1.93667	1.87667	2.21333
				MD02G1223300		MD13G1089700		MD02G1223300	0.67	1.37	1.42	1.45667
				MD01G1220400		MD05G1168200		MD01G1220400	30.9833	19.2267	19.8267	17.2433
				MD02G1317900		MD03G1082700		MD02G1317900	1.86667	3.33667	3.42333	4.32333
				MD09G1178400		MD12G1100900		MD09G1178400	1.02333	2.17	2.96	2.69
				MD00G1037500		MD11G1133400		MD00G1037500	60.65	106.94	110.15	120.663
				MD08G1121600		MD03G1281500		MD08G1121600	26.0467	13.9667	14.4067	13.58
				MD16G1117600		MD06G1098100		MD16G1117600	143.087	275.267	282.67	268.033
				MD16G1043000		MD17G1070700		MD16G1043000	20.42	31.6333	32.4967	30.09
				MD13G1280800		MD02G1157100		MD13G1280800	0.94	1.83	1.86667	1.33667
				MD01G1204500		MD17G1180800		MD01G1204500	44.85	26.0433	26.7633	29.41
				MD15G1323900		MD12G1178600		MD15G1323900	0.793333	1.61	1.37	1.95667
				MD09G1071400		MD08G1033000		MD09G1071400	22.5	35.16	36.0833	45.6367
				MD07G1186300		MD17G1034400		MD07G1186300	228.707	127.93	131.387	120.01
				MD17G1202200		MD05G1306600		MD17G1202200	2.02333	4.21	3.48333	3.61
				MD02G1226100		MD02G1284000		MD02G1226100	69.5767	36.6467	37.6833	43.05
				MD14G1002700		MD13G1181700		MD14G1002700	18.1267	11.6133	11.91	12.79
				MD02G1104100		MD09G1135900		MD02G1104100	6.93667	10.5533	10.8	13.12
				MD04G1009700		MD00G1131800		MD04G1009700	3.99	2.33333	2.40667	3.31333
				MD17G1139400		MD05G1039600		MD17G1139400	59.9767	87.5067	89.24	105.977
				MD15G1270100		MD10G1309200		MD15G1270100	9.20667	5.55	5.64333	8.10667
				MD17G1079500		MD03G1069500		MD17G1079500	9.46333	14.5033	14.7967	16.0333
				MD11G1287900		MD14G1179400		MD11G1287900	26.0767	13.0267	13.28	23.83
				MD13G1222900		MD03G1068900		MD13G1222900	8.12333	4.93333	5.04	6.02667
				MD04G1055700		MD16G1018000		MD04G1055700	3.31333	5.33667	5.42333	5.08333
				MD17G1164200		MD06G1029400		MD17G1164200	3.34667	2.04	2.08	2.11667
				MD12G1193600		MD07G1295200		MD12G1193600	0.506667	1.07	1.23333	1.48
				MD14G1185000		MD17G1117000		MD14G1185000	3.03667	6.29	6.53	8.02333
				MD08G1126500		MD03G1177200		MD08G1126500	63.9633	36.9467	37.5967	35.28
				MD03G1296600		MD11G1109700		MD03G1296600	0.873333	1.80667	1.42	1.48667
				MD09G1074300		MD10G1056900		MD09G1074300	13.36	7.93333	8.08667	5.5
				MD15G1401200		MD12G1238900		MD15G1401200	8.24667	4.59667	4.70667	5.08667
				MD13G1202800		MD15G1433500		MD13G1202800	1.62333	3.36667	5.85	10.1267
				MD00G1169500		MD10G1307900		MD00G1169500	6.73667	4.13667	4.18333	3.00667
				MD01G1101700		MD10G1305000		MD01G1101700	103.777	66.5167	67.3067	80.1433
				MD08G1098100		MD07G1299200		MD08G1098100	1.32	2.33	2.34667	4.37667
				MD13G1049200		MD13G1096700		MD13G1049200	6.22667	3.34	3.36667	3.86
				MD09G1173600		MD08G1140900		MD09G1173600	0.836667	1.75333	1.92333	1.40333
				MD15G1233200		MD15G1180700		MD15G1233200	12.1633	6.26	6.33333	6.46
				MD04G1150400		MD17G1095400		MD04G1150400	1.74333	3.21667	3.23667	3.56667
				MD06G1187500		MD07G1305300		MD06G1187500	5.70667	8.57667	8.63333	7.41333
				MD06G1225600		MD00G1014300		MD06G1225600	3.92333	5.92667	5.98333	7.15333
				MD09G1081000		MD11G1123400		MD09G1081000	1.88333	3.9	4.00333	4.56667
				MD15G1032900		MD04G1175400		MD15G1032900	19.65	40.8333	30.2467	42.9433
				MD09G1255700		MD11G1143500		MD09G1255700	21.6033	45.0667	81.26	132.79
				MD07G1266700		MD06G1148800		MD07G1266700	7.13	11.5333	11.5733	9.16
				MD16G1230700		MD06G1173800		MD16G1230700	4.76667	9.96667	12.3467	15.4533
				MD11G1256900		MD17G1189100		MD11G1256900	0.523333	1.11667	1.6	2.25
				MD07G1222300		MD07G1018400		MD07G1222300	6.91667	11.3467	11.3533	12.8233
				MD14G1240600		MD10G1078100		MD14G1240600	7.11333	4.52333	4.53667	4.65667
				MD11G1157100		MD14G1066000		MD11G1157100	0.353333	0.74	0.936667	1.15
				MD13G1217400		MD12G1233400		MD13G1217400	13.8033	7.95	8	5.08667
				MD01G1192100		MD16G1007000		MD01G1192100	1.52	3.18333	3.93	5.08667
				MD15G1148200		MD05G1006800		MD15G1148200	21.2767	34.8633	34.8233	38.3233
				MD09G1270600		MD08G1041400		MD09G1270600	628.277	926.737	925.58	960.437
				MD15G1153300		MD14G1090900		MD15G1153300	0.96	2.00333	1.49333	2.31667
				MD11G1054300		MD16G1091200		MD11G1054300	7.91333	5.09	5.09333	5.14667
				MD02G1166700		MD03G1118500		MD02G1166700	0.613333	1.31667	1.96333	2.66333
				MD02G1043100		MD14G1102600		MD02G1043100	5.97333	8.91667	8.89333	10.4033
				MD16G1044000		MD05G1167400		MD16G1044000	12.0567	25.4667	37.0533	52.4267
				MD14G1186700		MD17G1260800		MD14G1186700	1.92333	3.22333	3.20667	3.39333
				MD08G1039700		MD16G1027000		MD08G1039700	0.61	1.29333	1.19667	1.60333
				MD13G1000400		MD02G1039800		MD13G1000400	1.13333	2.46667	2.70333	2.9
				MD11G1229000		MD10G1332400		MD11G1229000	1.29	2.18333	2.16333	2.15
				MD04G1209500		MD10G1072700		MD04G1209500	8.64	13.16	13.09	12.7033
				MD13G1059300		MD15G1120000		MD13G1059300	8.71	4.31	4.3	3.07333
				MD17G1229300		MD01G1198900		MD17G1229300	9.63333	20.6867	22.9633	24.77
				MD03G1006500		MD05G1176100		MD03G1006500	0.856667	1.86	3.10333	3.01333
				MD08G1218800		MD09G1035100		MD08G1218800	6.18333	3.54333	3.50667	2.16
				MD04G1099200		MD12G1178800		MD04G1099200	1.8	3.9	5.12667	5.49333
				MD07G1164000		MD07G1286500		MD07G1164000	3.05333	5.37	5.32333	7.24667
				MD06G1049100		MD08G1112900		MD06G1049100	28.77	46.06	45.7867	63.7467
				MD07G1250500		MD03G1117900		MD07G1250500	8.73667	5.59667	5.56333	4.89667
				MD12G1190700		MD15G1383700		MD12G1190700	0.88	1.91	2.25667	3.05333
				MD01G1116700		MD03G1001300		MD01G1116700	1.41333	3.05333	3.27333	4.24
				MD14G1186800		MD03G1290700		MD14G1186800	0.753333	1.64667	1.12333	1.58
				MD05G1230600		MD13G1052700		MD05G1230600	11.7367	19.57	19.3567	21.19
				MD06G1213300		MD11G1299600		MD06G1213300	0.83	1.77333	2.06667	3.25333
				MD12G1257000		MD09G1032900		MD12G1257000	13.0067	6.30333	6.26667	7.06667
				MD14G1077700		MD08G1161700		MD14G1077700	70.0033	150.94	178.17	180.817
				MD16G1150200		MD04G1243800		MD16G1150200	1.18	2.54667	3.83	3.56667
				MD13G1101400		MD17G1238600		MD13G1101400	62.96	92.78	91.78	107.867
				MD04G1110500		MD15G1216500		MD04G1110500	0.413333	0.77	0.77	0.636667
				MD05G1359400		MD05G1335100		MD05G1359400	23.0667	12.46	12.3533	12.85
				MD10G1261300		MD09G1170800		MD10G1261300	3.72	5.81	5.72	6.37667
				MD15G1395200		MD13G1169800		MD15G1395200	6.26667	13.58	13.0733	11.2933
				MD05G1234400		MD04G1134100		MD05G1234400	23.15	14.52	14.37	12.16
				MD15G1312200		MD15G1415100		MD15G1312200	11.9567	7.01667	6.95	5.57333
				MD11G1160200		MD15G1351800		MD11G1160200	42.7567	68.1	66.93	64.0267
				MD11G1019200		MD04G1046000		MD11G1019200	0.24	0.53	0.466667	0.79
				MD14G1218200		MD01G1163900		MD14G1218200	13.0767	19.31	19	21.8067
				MD01G1150100		MD06G1229100		MD01G1150100	0.203333	0.443333	0.496667	0.62
				MD03G1216700		MD15G1294700		MD03G1216700	52.9433	33.6	33.1867	31.46
				MD01G1020100		MD16G1082900		MD01G1020100	25.5033	15.7833	15.55	11.58
				MD17G1030800		MD03G1227500		MD17G1030800	6.17667	9.18667	9.03	7.55667
				MD12G1038700		MD07G1027000		MD12G1038700	21.7133	37.2	36.5433	43.09
				MD01G1143600		MD15G1147800		MD01G1143600	0.346667	0.78	0.68	0.49
				MD06G1142200		MD13G1024300		MD06G1142200	8.43333	5.14333	5.08	5.65333
				MD17G1017100		MD11G1229800		MD17G1017100	0.32	0.706667	0.713333	0.8
				MD03G1224100		MD03G1222600		MD03G1224100	12.21	23.13	22.7033	20.9533
				MD12G1038300		MD10G1298700		MD12G1038300	7.86333	4.49333	4.42333	4.06333
				MD16G1053400		MD06G1041000		MD16G1053400	1.6	0.846667	0.83	0.936667
				MD02G1179000		MD13G1087500		MD02G1179000	7.30667	10.81	10.5533	10.0733
				MD14G1001800		MD13G1173500		MD14G1001800	4.50333	6.91	6.76333	8.03
				MD15G1140500		MD07G1228500		MD15G1140500	24.6967	53.8533	53.86	53.36
				MD10G1064700		MD01G1230100		MD10G1064700	5.25667	9.47667	9.26667	9.45667
				MD17G1229700		MD01G1053100		MD17G1229700	1.54	3.40667	4.27	4.47667
				MD01G1019500		MD03G1147100		MD01G1019500	19.4133	12.4067	12.1267	9.89
				MD14G1039100		MD16G1029400		MD14G1039100	56.5433	36.0867	35.2933	35.9667
				MD05G1121200		MD16G1201200		MD05G1121200	29.7467	46.39	45.2233	50.32
				MD10G1299600		MD13G1212300		MD10G1299600	1.70667	0.95	0.936667	0.676667
				MD16G1175900		MD08G1023700		MD16G1175900	0.866667	1.92	1.83333	1.91
				MD01G1172700		MD06G1089300		MD01G1172700	1.29333	2.32	2.26333	3.18667
				MD07G1003900		MD10G1051800		MD07G1003900	0.983333	2.13667	1.74667	3.67333
				MD17G1010000		MD01G1084700		MD17G1010000	12.9733	19.7033	19.1833	22.37
				MD05G1043200		MD09G1016700		MD05G1043200	13.6667	8.55	8.36667	7.66333
				MD13G1200600		MD13G1025200		MD13G1200600	10982	6017.67	5870.54	6241.71
				MD01G1041900		MD09G1281400		MD01G1041900	37.39	23.1367	22.5933	23.87
				MD11G1204700		MD01G1171100		MD11G1204700	2.94667	4.80667	4.67667	5.36
				MD10G1281100		MD09G1112200		MD10G1281100	74.33	41.96	40.9433	36.7867
				MD06G1094100		MD10G1186000		MD06G1094100	2.12	4.72333	6.37667	5.18333
				MD04G1172500		MD14G1236300		MD04G1172500	1.35333	3	3.46	4.2
				MD13G1079300		MD03G1019900		MD13G1079300	27.1767	42.9067	41.6267	54.25
				MD00G1221400		MD15G1271800		MD00G1221400	104.45	61.0633	59.3567	56.4533
				MD16G1287800		MD04G1122800		MD16G1287800	16.3833	24.2933	23.54	28.59
				MD06G1180400		MD05G1175600		MD06G1180400	0.63	1.37	1.18667	1.25667
				MD03G1292900		MD00G1204600		MD03G1292900	6.74	14.8533	18.6267	24.4267
				MD09G1054400		MD08G1026300		MD09G1054400	1.06333	2.33333	1.98333	3.31
				MD02G1045800		MD02G1145800		MD02G1045800	2.72667	4.14333	4.01667	5.14333
				MD17G1085000		MD08G1172400		MD17G1085000	2.51333	4.76	4.57333	4.61333
				MD04G1154100		MD04G1142600		MD04G1154100	18.6167	41.24	41.8	43.1567
				MD07G1205700		MD03G1215100		MD07G1205700	0.686667	1.53667	1.44667	1.82333
				MD05G1352500		MD13G1049800		MD05G1352500	2.84333	4.54333	4.38	4.50667
				MD17G1005800		MD07G1258400		MD17G1005800	4.12333	6.11667	5.89667	6.17
				MD03G1240600		MD01G1194700		MD03G1240600	17.2933	27.5067	26.6033	38.4167
				MD17G1016400		MD03G1203500		MD17G1016400	7.30333	16.2067	20.3567	24.1367
				MD09G1033600		MD15G1266600		MD09G1033600	105.817	52.1033	50.3533	51.66
				MD06G1189500		MD02G1232200		MD06G1189500	0.786667	1.75667	1.59	2.11
				MD13G1101200		MD05G1118500		MD13G1101200	38.6867	21.97	21.24	16.3533
				MD16G1207500		MD06G1128900		MD16G1207500	2.05	4.58667	4.65333	7.26667
				MD11G1280100		MD17G1281400		MD11G1280100	1.84	3.31667	3.19	3.35
				MD17G1167100		MD15G1394300		MD17G1167100	14.7633	23.2067	22.3767	30.1067
				MD14G1113700		MD00G1176400		MD14G1113700	0.856667	1.91667	1.87667	2.45667
				MD02G1076100		MD13G1061200		MD02G1076100	2.78333	1.7	1.63667	1.39333
				MD09G1292900		MD12G1198900		MD09G1292900	36.6033	81.5533	99.5467	77.7967
				MD12G1119800		MD15G1403000		MD12G1119800	16.0367	35.8467	52.7367	57.0233
				MD10G1083200		MD09G1271100		MD10G1083200	60.3333	96.76	92.9267	128.83
				MD01G1077900		MD15G1033100		MD01G1077900	63.6767	36.0667	34.74	27.96
				MD09G1270500		MD14G1014500		MD09G1270500	111.827	67.2867	64.6133	58.5167
				MD03G1287700		MD05G1073200		MD03G1287700	0.796667	1.39333	1.33333	1.48
				MD07G1173900		MD14G1126900		MD07G1173900	4.39	7.65333	7.34333	8.56333
				MD05G1050100		MD07G1065000		MD05G1050100	24.9433	12.99	12.49	10.9833
				MD13G1181800		MD05G1109100		MD13G1181800	49.0667	26.3567	25.3733	13.1333
				MD02G1105900		MD05G1344300		MD02G1105900	7.67667	11.3	10.8067	14.6633
				MD15G1215200		MD11G1225400		MD15G1215200	21.6733	48.52	64.2867	57.46
				MD12G1104300		MD09G1033000		MD12G1104300	8.87	5.51	5.29667	5.31
				MD05G1167600		MD05G1063200		MD05G1167600	11.6633	26.08	32.8833	43.08
				MD04G1062900		MD01G1073600		MD04G1062900	2.15	3.42333	3.26667	3.69
				MD09G1076000		MD16G1118600		MD09G1076000	0.513333	1.18333	1.14	1.35333
				MD10G1242100		MD01G1029100		MD10G1242100	0.49	1.11	0.926667	1.33667
				MD12G1028200		MD11G1210800		MD12G1028200	2.39667	5.41	4.95667	4.78333
				MD12G1034100		MD10G1279800		MD12G1034100	8.47	5.30667	5.07	4.67333
				MD07G1162700		MD02G1120300		MD07G1162700	0.25	0.556667	0.38	0.546667
				MD17G1105700		MD15G1234400		MD17G1105700	160.207	81.21	77.63	71.77
				MD07G1237000		MD08G1088700		MD07G1237000	52.6367	27.25	26.0667	16.96
				MD03G1014400		MD02G1050100		MD03G1014400	8.49667	19.0067	23.84	29.2567
				MD12G1161400		MD09G1119300		MD12G1161400	20.1733	11.72	11.18	13.22
				MD09G1194900		MD05G1116600		MD09G1194900	0.366667	0.836667	1.15	1.68
				MD17G1001400		MD06G1134600		MD17G1001400	11.1033	25.0433	27.9733	30.46
				MD17G1079700		MD06G1127200		MD17G1079700	11.24	25.4467	33.1867	38.6133
				MD15G1071000		MD06G1233700		MD15G1071000	99.81	63.1367	60.0433	54.2833
				MD15G1128700		MD09G1022200		MD15G1128700	1.25333	2.82667	3.00333	3.76667
				MD16G1132300		MD13G1188500		MD16G1132300	21.85	11.4267	10.8667	9.02
				MD15G1262300		MD08G1141400		MD15G1262300	4.32333	2.63	2.51	2.87667
				MD06G1016500		MD15G1236600		MD06G1016500	33.4267	19.63	18.6867	29.8167
				MD13G1023800		MD11G1024000		MD13G1023800	75.3667	44.5733	42.2833	39.6533
				MD03G1085000		MD11G1225300		MD03G1085000	4.25333	7.52667	7.17667	8.93
				MD16G1083300		MD12G1144800		MD16G1083300	109.57	59.94	56.8367	52.4267
				MD06G1169600		MD10G1126100		MD06G1169600	1.02	2.30333	2.06	1.93667
				MD03G1042100		MD13G1019900		MD03G1042100	2.13	3.54333	3.34333	3.66667
				MD02G1012700		MD06G1223800		MD02G1012700	17.2533	10.6633	10.0933	10.7033
				MD15G1365900		MD10G1273300		MD15G1365900	4.56333	8.59333	8.08	8.25333
				MD02G1060000		MD17G1250000		MD02G1060000	3.81333	5.67667	5.36	6.03
				MD15G1034300		MD02G1025600		MD15G1034300	1.56667	3.57	3.26333	3.61333
				MD01G1060300		MD11G1009500		MD01G1060300	17.7233	9.81667	9.27	6.14333
				MD17G1099800		MD04G1047700		MD17G1099800	15.4633	35.38	40.68	48.84
				MD17G1270600		MD17G1270300		MD17G1270600	2.05333	3.21333	3.01	3.22667
				MD00G1082300		MD08G1229100		MD00G1082300	4.86	2.63333	2.49333	2.77333
				MD08G1031700		MD00G1189000		MD08G1031700	24.6667	14.7033	13.8533	14.69
				MD07G1287700		MD02G1275900		MD07G1287700	4.60333	7.27333	6.83	7.21667
				MD04G1144500		MD10G1311700		MD04G1144500	1.14	1.76667	1.66	2.30333
				MD02G1249500		MD07G1023800		MD02G1249500	15.35	9.57	9.04	7.53667
				MD14G1060200		MD15G1409700		MD14G1060200	1.86	4.29667	4.82667	5.31
				MD04G1129800		MD15G1253900		MD04G1129800	2.17333	5.01	7.21667	10.4967
				MD02G1158600		MD10G1326500		MD02G1158600	74.21	40.16	37.7267	30.0033
				MD07G1241300		MD11G1222300		MD07G1241300	0.426667	0.763333	0.71	0.953333
				MD13G1265000		MD00G1009000		MD13G1265000	11.3267	17.1367	16.0333	16.93
				MD02G1168100		MD03G1256000		MD02G1168100	0.393333	0.93	0.733333	0.87
				MD12G1107400		MD08G1028600		MD12G1107400	11.7533	17.2233	16.06	19.9333
				MD07G1223100		MD02G1005600		MD07G1223100	3.47	5.38	5.01667	6.67667
				MD16G1090800		MD01G1162700		MD16G1090800	1.62667	3.78	4.84667	5.38
				MD13G1080800		MD00G1006800		MD13G1080800	41.28	65.7067	61.2933	42.4233
				MD08G1045100		MD09G1221600		MD08G1045100	3.05667	5.06333	4.70667	5.78667
				MD09G1230900		MD11G1108700		MD09G1230900	6.10667	10.6	9.86333	8.62333
				MD08G1178500		MD14G1215700		MD08G1178500	3.70667	7.08667	6.53333	6.58
				MD03G1297100		MD13G1109600		MD03G1297100	44.8167	24.0233	22.47	23.7633
				MD11G1269800		MD10G1045100		MD11G1269800	24.4833	14.9167	13.9267	11.4433
				MD08G1149900		MD12G1042900		MD08G1149900	0.993333	1.90333	1.77667	1.42
				MD15G1348000		MD06G1012300		MD15G1348000	1.17	2.75	2.95667	3.64333
				MD15G1251000		MD06G1203400		MD15G1251000	17.1133	39.99	61.9467	52.7233
				MD05G1205800		MD14G1019500		MD05G1205800	1.47	3.43667	4.66667	4.72
				MD11G1138900		MD06G1054800		MD11G1138900	41.2567	20.3767	18.9767	11.76
				MD00G1015600		MD05G1358900		MD00G1015600	2.86	6.69333	8.45	9.31667
				MD09G1027900		MD08G1061900		MD09G1027900	14.14	7.98333	7.42333	9.35667
				MD15G1153400		MD03G1101800		MD15G1153400	2.97	4.4	4.07667	4.70333
				MD16G1087900		MD10G1021700		MD16G1087900	1.05667	2.48	2.30333	2.23333
				MD08G1042700		MD02G1275400		MD08G1042700	0.686667	1.62333	2.05667	1.80333
				MD10G1308300		MD13G1071900		MD10G1308300	5.20667	2.91	2.69333	1.55333
				MD01G1068800		MD16G1174800		MD01G1068800	18.9567	9.42	8.73	9.15
				MD08G1015000		MD17G1077800		MD08G1015000	4.88333	7.90333	7.3	10.5933
				MD06G1011400		MD06G1227300		MD06G1011400	2.84	6.64333	9.74667	12.07
				MD17G1101100		MD12G1165400		MD17G1101100	0.413333	0.743333	0.683333	0.93
				MD01G1086500		MD04G1212100		MD01G1086500	11.1	5.99	5.55667	6.32
				MD04G1102000		MD17G1078100		MD04G1102000	0.246667	0.603333	0.723333	0.46
				MD09G1009100		MD03G1161500		MD09G1009100	5.79667	3.43333	3.18	1.99333
				MD02G1245100		MD17G1203800		MD02G1245100	15.92	9.06	8.38333	7.69667
				MD17G1113000		MD02G1192600		MD17G1113000	5.37667	8.49333	7.82333	9.2
				MD02G1171100		MD09G1173500		MD02G1171100	231.32	368.307	339.67	222.19
				MD11G1141200		MD10G1055500		MD11G1141200	3.17667	7.51	14.05	15.2067
				MD01G1092100		MD04G1014800		MD01G1092100	0.76	1.83	1.52333	1.99667
				MD07G1220100		MD05G1074600		MD07G1220100	2.71333	4.78	4.39333	3.53333
				MD02G1222600		MD00G1033200		MD02G1222600	1.90667	4.51333	4.02333	3.48333
				MD16G1116100		MD15G1067900		MD16G1116100	10.39	19.1267	17.57	17.77
				MD16G1084400		MD06G1216400		MD16G1084400	6.25333	14.88	18.6333	16.79
				MD07G1266500		MD15G1303500		MD07G1266500	15.9933	9.01667	8.29	6.88
				MD15G1377600		MD02G1013800		MD15G1377600	1.31	3.16333	4.45667	4.96333
				MD01G1139800		MD04G1156000		MD01G1139800	5.49	3.21667	2.96667	2.52333
				MD12G1178500		MD16G1129900		MD12G1178500	52.53	28.4367	26.0967	26.33
				MD05G1321500		MD04G1020100		MD05G1321500	0.993333	2.39667	3.41333	5.74
				MD11G1199800		MD15G1411200		MD11G1199800	3.89	5.97667	5.45	5.20667
				MD10G1281000		MD12G1205900		MD10G1281000	9.16333	4.53667	4.16	3.89333
				MD13G1085200		MD14G1176400		MD13G1085200	7.92333	19.1067	23.8533	21.6833
				MD12G1103500		MD08G1062400		MD12G1103500	5.71667	3.04667	2.80667	2.44333
				MD02G1243700		MD10G1120200		MD02G1243700	0.513333	1.26	0.773333	0.66
				MD04G1112000		MD13G1014100		MD04G1112000	64.01	31.5367	29	21.77
				MD15G1098700		MD02G1118000		MD15G1098700	0.386667	0.75	0.683333	0.666667
				MD16G1236400		MD03G1227300		MD16G1236400	76.9	43.19	39.4833	33.0167
				MD16G1079100		MD00G1007000		MD16G1079100	80.0167	45.3567	41.4967	45.1267
				MD13G1028300		MD00G1015800		MD13G1028300	43.95	25.67	23.44	20.3967
				MD14G1060500		MD15G1012300		MD14G1060500	0.15	0.38	0.633333	1.15667
				MD03G1235600		MD15G1279200		MD03G1235600	14.6967	22.75	20.7067	25.5767
				MD02G1195400		MD07G1240700		MD02G1195400	59.12	86.1967	78.31	85.0833
				MD13G1130700		MD07G1189600		MD13G1130700	35.67	18.2033	16.6133	14.85
				MD15G1391500		MD15G1090700		MD15G1391500	19.4967	29.8067	27.0867	29.5467
				MD12G1168600		MD05G1320800		MD12G1168600	29.6533	52.96	48.1467	53.1
				MD07G1075600		MD03G1230600		MD07G1075600	7.28	4.65333	4.23	5.48333
				MD08G1217600		MD11G1279600		MD08G1217600	1.71	4.16667	5.15	7.26667
				MD09G1091000		MD02G1013500		MD09G1091000	5.24	12.7267	13.3633	16.0633
				MD15G1039300		MD15G1021500		MD15G1039300	71.2233	41.3733	37.58	29.3033
				MD15G1378200				MD15G1378200	12.59	8.08333	7.34667	6.41
				MD13G1144600				MD13G1144600	1.69333	0.826667	0.75	0.74
				MD15G1385500				MD15G1385500	10.5867	6.56333	5.95667	4.70333
				MD08G1106900				MD08G1106900	4.49333	2.36333	2.14667	1.66667
				MD15G1070000				MD15G1070000	0.603333	1.10333	0.996667	1.20667
				MD16G1090000				MD16G1090000	9.86333	5.47333	4.97667	5.75667
				MD16G1024000				MD16G1024000	8.98333	13.6433	12.28	9.91333
				MD15G1410400				MD15G1410400	5.81	3.39	3.08333	3.52667
				MD11G1003700				MD11G1003700	2.85	7.10333	10.14	6.26
				MD00G1132400				MD00G1132400	6.71333	3.44333	3.10333	2.15333
				MD11G1108500				MD11G1108500	16.48	40.2433	64.5833	67.72
				MD07G1043300				MD07G1043300	7.33	17.8933	19.7633	15.3667
				MD15G1374500				MD15G1374500	4.27333	2.28333	2.06	1.57
				MD02G1190300				MD02G1190300	3.55	2.19667	1.99	2.15
				MD02G1099000				MD02G1099000	1.25	1.98	1.77667	2.87333
				MD15G1321300				MD15G1321300	0.33	0.833333	1.05333	0.6
				MD10G1258700				MD10G1258700	10.1467	5.43333	4.89	4.40667
				MD03G1231800				MD03G1231800	6.28333	15.3867	20.5833	33.54
				MD03G1023000				MD03G1023000	10.1433	24.94	25.9433	18.82
				MD03G1020500				MD03G1020500	4.76667	8.76333	7.86667	8.02
				MD15G1281000				MD15G1281000	1.03	2.53667	2.14333	2.16333
				MD02G1150500				MD02G1150500	68.96	44.24	39.73	40.79
				MD12G1029500				MD12G1029500	24.8833	39.7633	35.63	45.38
				MD12G1002300				MD12G1002300	6.63333	4.16	3.74333	4.30667
				MD00G1015700				MD00G1015700	2.46333	6.09	7.59333	9.27
				MD04G1181300				MD04G1181300	21.1667	12.11	10.8833	10.86
				MD08G1114100				MD08G1114100	0.866667	2.16667	3.21333	3.24667
				MD06G1118000				MD06G1118000	0.376667	0.95	0.59	0.823333
				MD04G1208200				MD04G1208200	1.50667	0.923333	0.82	0.686667
				MD08G1134000				MD08G1134000	27.21	15.6	13.9467	12.98
				MD00G1035800				MD00G1035800	0.24	0.603333	1.32	1.63333
				MD17G1103800				MD17G1103800	7.49	4.61	4.12333	4.48
				MD01G1240200				MD01G1240200	2.02667	3.14333	2.80667	2.69667
				MD16G1269600				MD16G1269600	2.76667	4.20667	3.75	4.78667
				MD17G1082000				MD17G1082000	0.38	0.956667	1.48667	1.72667
				MD13G1117000				MD13G1117000	8.02	19.9733	21.99	20.4967
				MD12G1125600				MD12G1125600	8.36	4.13	3.69667	3.6
				MD13G1136900				MD13G1136900	6.01333	3.07	2.73	1.87333
				MD16G1193000				MD16G1193000	4.55	8.49667	7.55667	9.06667
				MD04G1194600				MD04G1194600	5.81667	14.5633	18.0267	14.6233
				MD08G1190600				MD08G1190600	10.69	6.21667	5.54667	5.34
				MD11G1182500				MD11G1182500	3.36	8.37	7.00667	9.25333
				MD02G1005800				MD02G1005800	12.4267	6.21333	5.50333	5.57333
				MD02G1129900				MD02G1129900	29.91	17.4133	15.4533	19.22
				MD06G1182400				MD06G1182400	12.9667	32.6167	46.56	46.1467
				MD15G1395700				MD15G1395700	30.89	19.59	17.3833	18.3733
				MD16G1121100				MD16G1121100	5.63667	3.12	2.75	2.38
				MD15G1033600				MD15G1033600	4.32667	6.78333	5.97667	6.86
				MD16G1004100				MD16G1004100	11.4867	17.47	15.4233	17.1867
				MD02G1087100				MD02G1087100	2.93333	7.42333	12.2467	8.04667
				MD15G1193000				MD15G1193000	0.786667	2	1.85	1.16333
				MD07G1205500				MD07G1205500	9.93333	5.15	4.54667	4.73667
				MD07G1221900				MD07G1221900	19.2733	28.3433	24.9467	26.8033
				MD12G1129500				MD12G1129500	1	1.89667	1.65667	1.96
				MD14G1139300				MD14G1139300	0.15	0.406667	0.303333	0.526667
				MD03G1296200				MD03G1296200	4.86333	8.87667	7.78667	8.14
				MD09G1039100				MD09G1039100	6.55	3.44333	3.03333	3.74
				MD04G1096200				MD04G1096200	38.3133	22.12	19.3967	29.57
				MD01G1074700				MD01G1074700	10.0733	5.06667	4.45333	3.82667
				MD11G1021700				MD11G1021700	1.65	3.03667	2.64667	3.41333
				MD13G1034200				MD13G1034200	1.31333	2.18	1.89667	2.34333
				MD15G1402800				MD15G1402800	75.2933	45.8	40.23	37.4767
				MD02G1137500				MD02G1137500	0.323333	0.826667	1.03333	1.95333
				MD06G1093000				MD06G1093000	1.19	2.02333	1.77	2.08667
				MD08G1221800				MD08G1221800	4.69333	8.91333	7.78	9.21
				MD03G1026600				MD03G1026600	3.33667	1.62	1.42333	1.37
				MD09G1186000				MD09G1186000	4.02333	2.38	2.08333	2.07
				MD16G1059700				MD16G1059700	4.75	12.11	11.9933	15.46
				MD16G1108100				MD16G1108100	6.64	3.85667	3.37	4.12333
				MD10G1074400				MD10G1074400	0.813333	2.03333	1.11667	0.916667
				MD11G1090800				MD11G1090800	11.7867	6.79	5.93333	4.90333
				MD13G1201500				MD13G1201500	18.2933	11.53	10.0667	9.4
				MD10G1029800				MD10G1029800	3.25667	5.70333	4.97333	5.84667
				MD16G1026000				MD16G1026000	2.27667	5.78667	10.22	11.1833
				MD12G1121200				MD12G1121200	7.55333	4.44667	3.90333	3.75667
				MD06G1235500				MD06G1235500	37.8933	22.2667	19.44	17.05
				MD13G1107500				MD13G1107500	9.98333	6.02333	5.27667	4.67333
				MD03G1071800				MD03G1071800	83.9333	48.8067	42.57	47.35
				MD09G1235700				MD09G1235700	49.69	94.49	82.2433	72.1367
				MD11G1280200				MD11G1280200	14.4233	37	29.03	33.5733
				MD03G1098100				MD03G1098100	50.6667	31.65	27.53	25.6233
				MD10G1058300				MD10G1058300	11.59	7.15667	6.21333	5.75
				MD07G1291700				MD07G1291700	0.243333	0.613333	0.52	0.71
				MD01G1064600				MD01G1064600	4.40667	6.97	6.06667	7.31333
				MD14G1086100				MD14G1086100	0.47	1.24	1.80667	2.15
				MD10G1161900				MD10G1161900	19.51	11.3067	9.83333	10.24
				MD06G1083400				MD06G1083400	1.09	2.95	2.73667	3.73333
				MD15G1279800				MD15G1279800	2.25333	5.95	5.81333	5.42
				MD07G1221400				MD07G1221400	7.27	4.44	3.86	3.97667
				MD14G1186300				MD14G1186300	0.35	0.92	0.743333	0.903333
				MD07G1206700				MD07G1206700	15.99	24.34	21.0233	24.75
				MD15G1289800				MD15G1289800	5.39	2.91667	2.53	1.62667
				MD15G1260700				MD15G1260700	11.3233	6	5.18667	6.26
				MD04G1213800				MD04G1213800	74.7433	41.3667	35.74	33.1067
				MD05G1206700				MD05G1206700	2.16667	5.65	7.51667	5.79333
				MD01G1086800				MD01G1086800	0.596667	1.54333	1.42333	2.22667
				MD08G1015500				MD08G1015500	0.986667	0.526667	0.456667	0.486667
				MD05G1320400				MD05G1320400	20.0933	31.2833	26.8967	40.5633
				MD09G1271200				MD09G1271200	0.54	1.42333	1.31	1.65333
				MD07G1182200				MD07G1182200	13.59	8.36333	7.21	6.43333
				MD00G1077400				MD00G1077400	18.22	10.45	8.98667	9.44333
				MD03G1005500				MD03G1005500	9.38	5.67333	4.88333	4.06667
				MD03G1066200				MD03G1066200	0.583333	1.07667	0.923333	1.05
				MD13G1087200				MD13G1087200	1.10667	2.91	3.00667	3.89333
				MD16G1020100				MD16G1020100	7.41667	4.5	3.85667	4.22
				MD04G1118500				MD04G1118500	0.753333	0.386667	0.336667	0.353333
				MD01G1006600				MD01G1006600	9.86667	16.8867	14.3867	29.9133
				MD00G1098300				MD00G1098300	0.33	0.866667	1.01	1.30333
				MD03G1028800				MD03G1028800	0.4	1.04333	0.993333	1.40667
				MD15G1205500				MD15G1205500	1.59	4.15667	4.06667	4.43667
				MD01G1118100				MD01G1118100	49.47	27.99	23.9333	21.8133
				MD15G1282600				MD15G1282600	9.50667	25.1033	24.9667	15.6067
				MD00G1175200				MD00G1175200	15.2333	27.0933	23.0033	24.5467
				MD14G1214200				MD14G1214200	8.19667	21.5767	17.81	19.25
				MD17G1262500				MD17G1262500	0.24	0.63	0.903333	0.92
				MD03G1004000				MD03G1004000	1.77333	4.74333	6.85667	8.35667
				MD14G1235200				MD14G1235200	0.896667	2.42333	3.46333	6.06667
				MD15G1244200				MD15G1244200	0.8	2.18667	2.13667	2.87667
				MD16G1035000				MD16G1035000	24.7233	13.9567	11.8433	9.78
				MD14G1059400				MD14G1059400	0.73	1.96667	0.993333	1.00667
				MD12G1174000				MD12G1174000	0.496667	1.34667	0.946667	1.60333
				MD15G1146700				MD15G1146700	13.4567	7.15333	6.06667	4.90333
				MD02G1303300				MD02G1303300	0.476667	1.29	1.32	0.843333
				MD14G1125900				MD14G1125900	181.873	108.917	92.33	80.5433
				MD12G1003600				MD12G1003600	4.65667	12.59	13.5167	10.46
				MD04G1240700				MD04G1240700	0.416667	1.13667	0.616667	0.983333
				MD15G1106000				MD15G1106000	1.86333	5.15667	4.34667	4.42
				MD10G1192900				MD10G1192900	0.766667	2.13333	3.54	3.77667
				MD12G1145700				MD12G1145700	10.1167	5.69667	4.81333	3.59667
				MD06G1124600				MD06G1124600	7.92	4.58	3.86	2.83333
				MD16G1069500				MD16G1069500	60.9933	32.1233	27.13	21.8333
				MD13G1118500				MD13G1118500	38.45	107.763	69.4467	66.65
				MD04G1079000				MD04G1079000	10.1567	6.24	5.27	5.35333
				MD17G1230800				MD17G1230800	117.303	70.63	59.5733	75.5
				MD14G1001000				MD14G1001000	9.52	5.97667	5.07	3.33667
				MD15G1263800				MD15G1263800	62.3667	38.7133	32.6067	34.2033
				MD13G1108500				MD13G1108500	0.82	2.37333	3.67333	5.26333
				MD02G1153500				MD02G1153500	17.01	48.06	90.2733	115.19
				MD06G1128400				MD06G1128400	15.2733	7.98333	6.73333	7.85
				MD15G1010800				MD15G1010800	0.73	1.29333	1.08667	1.18
				MD13G1205200				MD13G1205200	3.6	1.93333	1.62667	1.01667
				MD00G1171600				MD00G1171600	0.266667	0.786667	0.953333	1.27333
				MD08G1106600				MD08G1106600	4.03	6.46667	5.41	6.65333
				MD16G1069900				MD16G1069900	0.75	2.16667	3.02	2.66
				MD15G1133100				MD15G1133100	14.5133	9.29	7.79333	6.57333
				MD11G1063100				MD11G1063100	1.29667	3.63333	3.44333	3.39
				MD05G1345800				MD05G1345800	17.69	50.26	62.72	81.7
				MD10G1289200				MD10G1289200	17.3067	8.96333	7.52333	6.73667
				MD07G1025100				MD07G1025100	132.567	66.97	56.2	48.99
				MD03G1205200				MD03G1205200	21.6967	13.22	11.08	12.76
				MD17G1229500				MD17G1229500	3.65	10.4633	11.8733	12.25
				MD01G1237600				MD01G1237600	1.58333	4.49667	7.7	11.94
				MD15G1126700				MD15G1126700	37.9367	109.59	124.253	77.7367
				MD15G1402700				MD15G1402700	259.723	129.443	108.243	96.6667
				MD11G1212200				MD11G1212200	4.31	12.5867	8.74	9.02333
				MD09G1126700				MD09G1126700	16.1367	9.30333	7.76667	5.75333
				MD06G1222800				MD06G1222800	26.6833	12.9733	10.8333	11.4833
				MD11G1221100				MD11G1221100	66.6433	41.48	34.5333	38.5167
				MD16G1236700				MD16G1236700	0.156667	0.46	0.48	0.823333
				MD04G1153900				MD04G1153900	1.90667	5.68667	5.58667	7.73333
				MD15G1066300				MD15G1066300	24.13	12.7467	10.6267	8.86
				MD07G1163800				MD07G1163800	0.81	2.37	3.2	2.17333
				MD06G1158800				MD06G1158800	4.80333	2.59	2.14333	3.07
				MD03G1048900				MD03G1048900	20.5	12.43	10.2967	8.11333
				MD16G1198300				MD16G1198300	2.8	8.19	5.80333	7.27
				MD13G1049400				MD13G1049400	0.373333	1.09	1.05333	1.07667
				MD11G1054100				MD11G1054100	114.463	335.65	436.287	407.97
				MD03G1134700				MD03G1134700	3.17667	9.41333	8.29333	8.38333
				MD06G1075800				MD06G1075800	5.66	3.04333	2.52333	1.56333
				MD03G1059200				MD03G1059200	0.323333	0.95	1.61667	2.22667
				MD04G1203200				MD04G1203200	2.22	1.31	1.09333	1.25
				MD02G1291200				MD02G1291200	0.916667	2.81667	3.86	3.74333
				MD16G1170900				MD16G1170900	8.73333	4.69667	3.9	4.06667
				MD15G1402400				MD15G1402400	23.18	11.97	9.90667	9.66333
				MD05G1251100				MD05G1251100	3.35	6.27667	5.16667	6.29333
				MD05G1061600				MD05G1061600	0.0966667	0.306667	0.14	0.163333
				MD12G1137900				MD12G1137900	170.773	99.3467	81.8267	78.48
				MD13G1093700				MD13G1093700	126.097	204.267	167.477	154.18
				MD06G1038900				MD06G1038900	12.48	20.3733	16.7133	16.2133
				MD04G1243200				MD04G1243200	1.36667	4.12	3.87667	5.98667
				MD04G1184600				MD04G1184600	0.23	0.75	1.20333	1.25667
				MD15G1438500				MD15G1438500	7.60667	3.89667	3.21	2.78
				MD03G1171500				MD03G1171500	0.286667	0.88	1.23	2.81
				MD07G1214400				MD07G1214400	10.1133	5.95333	4.89333	5.10667
				MD17G1030600				MD17G1030600	8.99667	4.43	3.64	3.96
				MD06G1012500				MD06G1012500	2.45	1.45	1.19	1.13667
				MD09G1256300				MD09G1256300	4.92333	15.15	22.4533	108.817
				MD17G1072300				MD17G1072300	0.266667	0.85	1.01	1.81
				MD15G1163200				MD15G1163200	6.25333	3.06	2.50667	2.61667
				MD02G1045500				MD02G1045500	1.45333	2.15333	1.77	2.20667
				MD02G1266900				MD02G1266900	45.64	28.36	23.2667	20.75
				MD06G1082500				MD06G1082500	30.6367	19.3467	15.82	16.2567
				MD14G1148600				MD14G1148600	6.87	3.57667	2.92667	2.54667
				MD02G1018300				MD02G1018300	4.5	2.83333	2.32333	2.23667
				MD03G1128800				MD03G1128800	41.63	26.23	21.4367	20.0833
				MD01G1195000				MD01G1195000	0.42	1.32	1.10667	1.46667
				MD16G1065700				MD16G1065700	4.96	2.47333	2.01	2.52667
				MD05G1284000				MD05G1284000	0.606667	1.89333	2.54667	3.44333
				MD07G1189500				MD07G1189500	3.23667	5.84	4.72667	5.7
				MD16G1090700				MD16G1090700	51.2867	161.383	180.803	227.06
				MD08G1118000				MD08G1118000	4.39333	2.72667	2.22667	2.34667
				MD07G1248400				MD07G1248400	27.7533	16.2633	13.2833	12
				MD05G1266000				MD05G1266000	10.6233	19.09	15.4867	15.2367
				MD12G1104800				MD12G1104800	35.6133	18.28	14.8533	12.4967
				MD11G1173900				MD11G1173900	63.06	102.223	82.9233	81.0967
				MD15G1155800				MD15G1155800	0.49	1.59667	2.17333	2.63
				MD03G1088100				MD03G1088100	4.50333	14.4233	15.79	19.7267
				MD11G1109300				MD11G1109300	1.12	3.63333	6.18	5.46333
				MD11G1172700				MD11G1172700	2.70333	1.58	1.28667	1.12667
				MD03G1294400				MD03G1294400	0.373333	1.23	1.69667	2.28333
				MD10G1170600				MD10G1170600	1.45	4.72	5.58667	7.27667
				MD03G1070400				MD03G1070400	1.21333	3.96333	3.34667	3.36667
				MD05G1026000				MD05G1026000	3.61333	5.36667	4.33	3.72
				MD11G1019400				MD11G1019400	59.8667	37.2167	30.1267	24.0233
				MD03G1144400				MD03G1144400	2.38	4.13667	3.33	6.20667
				MD04G1100400				MD04G1100400	4.24	2.19667	1.76	0.813333
				MD11G1293500				MD11G1293500	4.46667	2.35	1.9	1.96667
				MD03G1020000				MD03G1020000	28.73	14.1067	11.4267	10.5
				MD14G1128200				MD14G1128200	50.11	31.3067	25.2167	23.9733
				MD07G1187400				MD07G1187400	1.96333	6.36	7.63	14.4633
				MD11G1158500				MD11G1158500	0.476667	1.60667	2.05667	2.03
				MD05G1165400				MD05G1165400	3.55333	5.63333	4.51667	4.77667
				MD07G1282000				MD07G1282000	2.17333	1.3	1.04667	0.986667
				MD15G1285300				MD15G1285300	1.65667	2.59667	2.09	2.26
				MD09G1233300				MD09G1233300	0.24	0.826667	1.42333	1.22667
				MD13G1056800				MD13G1056800	34.85	18.6167	14.99	13.1567
				MD01G1141400				MD01G1141400	16.6067	8.98	7.22667	6.88
				MD10G1114300				MD10G1114300	4.76333	2.43333	1.95333	2.04
				MD09G1014400				MD09G1014400	2.54667	4.37333	3.50333	4.33333
				MD03G1159600				MD03G1159600	1.58333	2.6	2.07333	2.41667
				MD00G1165200				MD00G1165200	2.07	6.86	5.67333	7.64667
				MD02G1151700				MD02G1151700	25.7	15.52	12.4367	11.3867
				MD03G1230900				MD03G1230900	10	5.95667	4.77667	4.28667
				MD15G1290300				MD15G1290300	118.197	69.8733	56.0467	58.0933
				MD03G1265600				MD03G1265600	4.14333	6.56333	5.24	4.52667
				MD06G1172800				MD06G1172800	52.9033	27.7667	22.2167	29.3133
				MD15G1095000				MD15G1095000	14.7233	22.8067	18.1433	21.4067
				MD14G1150000				MD14G1150000	21.6933	13.4567	10.7467	9.83
				MD10G1071000				MD10G1071000	25.0867	44.5567	35.4033	36.4133
				MD02G1022300				MD02G1022300	9.14667	5.39	4.30333	5.19667
				MD07G1284200				MD07G1284200	0.133333	0.44	0.716667	1.15
				MD08G1219200				MD08G1219200	0.09	0.313333	0.286667	0.48
				MD10G1296800				MD10G1296800	6.95667	3.88667	3.1	2.79667
				MD05G1331000				MD05G1331000	5.64667	3.00333	2.39333	2.53333
				MD15G1133200				MD15G1133200	2.96333	1.54	1.23	1.38667
				MD06G1039000				MD06G1039000	23.31	35.9	28.3667	24.5967
				MD09G1256000				MD09G1256000	6.62	22.3967	32.4833	192.743
				MD01G1234100				MD01G1234100	16.5567	10.61	8.38	9.14667
				MD04G1002500				MD04G1002500	135.057	71.8867	56.94	63.6733
				MD02G1042200				MD02G1042200	3.35667	11.4667	17.4	17.2833
				MD15G1101800				MD15G1101800	1.27333	4.33667	4.27	9.61333
				MD15G1139200				MD15G1139200	108.13	68.7933	54.17	46.4233
				MD05G1319800				MD05G1319800	3.29	11.3967	10.1667	10.3033
				MD11G1039600				MD11G1039600	0.106667	0.393333	0.543333	0.666667
				MD17G1110200				MD17G1110200	17.75	62.09	105.007	97.7067
				MD05G1305700				MD05G1305700	21.2967	11.58	9.12667	9.27667
				MD04G1090500				MD04G1090500	71.3733	45.71	36.01	39.59
				MD09G1155100				MD09G1155100	2.03333	3.73667	2.91333	3.43667
				MD11G1068400				MD11G1068400	11.84	19.1667	14.9467	19.0533
				MD14G1175000				MD14G1175000	0.146667	0.533333	0.653333	0.84
				MD09G1141200				MD09G1141200	26.94	15.9067	12.45	9.72
				MD17G1181600				MD17G1181600	0.0766667	0.296667	0.473333	0.596667
				MD16G1254900				MD16G1254900	10.8267	5.70667	4.45667	5.34333
				MD08G1203800				MD08G1203800	17.51	27.3867	21.2633	24.8933
				MD05G1324100				MD05G1324100	14.13	7.28333	5.67667	4.79
				MD17G1153000				MD17G1153000	10.1	35.6433	47.07	38.1967
				MD11G1149900				MD11G1149900	14.4667	7.30333	5.67	5.73667
				MD04G1161300				MD04G1161300	1.94	3.06333	2.38	2.82667
				MD05G1084400				MD05G1084400	5.54333	2.72	2.13	2.05
				MD11G1217100				MD11G1217100	0.72	2.53333	2	1.61667
				MD05G1295700				MD05G1295700	25.8367	14.96	11.6067	10.9667
				MD12G1103300				MD12G1103300	1.12667	4.04667	3.82	3.46667
				MD11G1098100				MD11G1098100	11.2867	5.83667	4.52333	3.28667
				MD05G1190600				MD05G1190600	9.17	5.83667	4.51667	3.8
				MD03G1259100				MD03G1259100	0.106667	0.393333	0.366667	0.873333
				MD05G1320900				MD05G1320900	1.59	2.46	1.91	2.91
				MD07G1265200				MD07G1265200	12.2433	7.07333	5.46	7.40667
				MD00G1187000				MD00G1187000	46.0067	25.5333	19.6767	28.7967
				MD16G1037000				MD16G1037000	27.3	17.11	13.2233	14.1167
				MD14G1033000				MD14G1033000	5.17667	3.25667	2.52667	2.75667
				MD14G1221800				MD14G1221800	1.40667	5.12	6.98333	7.57
				MD11G1154200				MD11G1154200	2.02667	0.976667	0.756667	0.67
				MD17G1120700				MD17G1120700	0.176667	0.66	0.813333	1.21333
				MD10G1158100				MD10G1158100	75.83	40.5567	31.2867	28.52
				MD08G1110500				MD08G1110500	12.4267	7.74667	5.96667	5.99
				MD14G1008800				MD14G1008800	0.933333	1.75333	1.34333	1.81667
				MD17G1086200				MD17G1086200	7.27333	4.38333	3.36	3.09667
				MD05G1219400				MD05G1219400	17.37	9.65333	7.40667	5.91667
				MD11G1021300				MD11G1021300	0.156667	0.57	0.353333	0.276667
				MD12G1000800				MD12G1000800	38.33	24.7633	18.9133	15.9067
				MD14G1208000				MD14G1208000	1.14333	4.21	4.88	7.25333
				MD09G1219100				MD09G1219100	21.69	10.6467	8.15	8.47333
				MD05G1123700				MD05G1123700	8.59667	4.98667	3.82	2.47333
				MD12G1054000				MD12G1054000	0.83	3.11667	3.47	3.88333
				MD08G1021600				MD08G1021600	443.62	268.53	204.48	195.123
				MD17G1275800				MD17G1275800	0.433333	1.62	0.56	0.82
				MD15G1106300				MD15G1106300	0.08	0.31	0.6	0.4
				MD11G1081100				MD11G1081100	55.9133	35.9333	27.2633	25.01
				MD03G1292300				MD03G1292300	4.07667	2.43	1.84667	2.22667
				MD09G1146700				MD09G1146700	5.63333	3.45	2.61667	2.36
				MD16G1201400				MD16G1201400	67.94	38.34	29.0833	31.5433
				MD07G1002900				MD07G1002900	11.3367	6.78667	5.13	4.67333
				MD15G1035100				MD15G1035100	12.4433	19.5167	14.6567	14.98
				MD16G1240400				MD16G1240400	1.99667	3.26	2.46333	1.59667
				MD05G1304000				MD05G1304000	0.116667	0.456667	0.56	0.59
				MD04G1185900				MD04G1185900	0.186667	0.76	0.783333	0.623333
				MD11G1102300				MD11G1102300	0.566667	0.996667	0.746667	1.06
				MD00G1018400				MD00G1018400	5.94333	10.61	7.93	6.41333
				MD13G1147700				MD13G1147700	15.6133	8.55	6.44	7.06667
				MD10G1306800				MD10G1306800	6.44333	3.87667	2.92	2.92667
				MD15G1030100				MD15G1030100	11.0133	6	4.5	5.85333
				MD02G1110500				MD02G1110500	1.49667	5.88667	4.99333	4.64667
				MD03G1217900				MD03G1217900	0.706667	2.79	4.63333	5.24667
				MD17G1201600				MD17G1201600	0.543333	2.14333	3.71333	7.51333
				MD09G1141700				MD09G1141700	45.81	23.5	17.6533	14.0467
				MD15G1044300				MD15G1044300	2.60667	10.3067	12.13	22.5667
				MD04G1019400				MD04G1019400	70.3867	36.97	27.7033	22.3267
				MD02G1267000				MD02G1267000	3.75667	1.85	1.39667	1.38
				MD12G1208500				MD12G1208500	7.43333	3.95	2.96	3.75667
				MD13G1050400				MD13G1050400	11.9	7.37	5.51333	6.16667
				MD15G1443500				MD15G1443500	1.71	2.83	2.1	3.07333
				MD09G1140300				MD09G1140300	0.226667	0.906667	1.79333	2.16667
				MD08G1161200				MD08G1161200	1.23	5.04	6.27667	7.65667
				MD07G1236800				MD07G1236800	57.4833	110.957	82.1367	83.2733
				MD14G1009300				MD14G1009300	1.51333	2.68667	1.98	2.61
				MD06G1083300				MD06G1083300	1.12333	1.67	1.23333	1.53
				MD05G1168200				MD05G1168200	0.336667	1.37333	2.12333	5.32667
				MD07G1236500				MD07G1236500	164.157	257.513	190.137	206.293
				MD03G1082700				MD03G1082700	18.9533	11.0467	8.18	6.42333
				MD11G1061800				MD11G1061800	7.30333	4.02333	2.97667	2.67
				MD05G1235000				MD05G1235000	2.15333	1.06333	0.783333	0.756667
				MD14G1004600				MD14G1004600	35.99	17.45	12.89	15.67
				MD11G1133400				MD11G1133400	0.58	2.38333	3.52333	5.57333
				MD14G1168400				MD14G1168400	11.0333	6.26	4.62667	4.47333
				MD08G1011700				MD08G1011700	20.4133	35.06	25.6967	50.7633
				MD17G1070700				MD17G1070700	146.01	93.5267	68.7067	58.8667
				MD10G1324500				MD10G1324500	55.35	35.4833	26.0633	23.7533
				MD17G1180800				MD17G1180800	3.91667	2.41333	1.77333	0.893333
				MD12G1178600				MD12G1178600	25.1567	16.0033	11.6733	9.79667
				MD15G1390400				MD15G1390400	0.846667	1.53667	1.11333	1.18333
				MD17G1034400				MD17G1034400	3.66	1.94	1.41	1.01667
				MD09G1113400				MD09G1113400	0.123333	0.526667	0.31	0.476667
				MD11G1060600				MD11G1060600	174.127	106.04	76.9367	73.1267
				MD13G1181700				MD13G1181700	65.6933	38.51	27.8633	20.8467
				MD09G1135900				MD09G1135900	21.3433	13.53	9.80667	7.81333
				MD00G1131800				MD00G1131800	60.6267	31.6467	22.8167	13.69
				MD14G1011900				MD14G1011900	3.11667	1.85333	1.33333	1.35667
				MD14G1008900				MD14G1008900	1.08	2.07	1.47333	1.40333
				MD03G1267900				MD03G1267900	3.87333	16.07	17.2133	15.18
				MD09G1111200				MD09G1111200	31.88	20.5833	14.7933	15.7167
				MD03G1069500				MD03G1069500	7.60667	31.68	45.35	77.1567
				MD15G1346400				MD15G1346400	0.87	3.65333	4.72667	3.97
				MD09G1031100				MD09G1031100	2.84	1.38667	0.993333	1.45
				MD11G1248200				MD11G1248200	20.9567	30.87	21.9833	29.9833
				MD17G1081000				MD17G1081000	0.22	0.923333	1.02667	1.62667
				MD06G1029400				MD06G1029400	15.2467	8.24667	5.86333	2.78667
				MD15G1271200				MD15G1271200	9.88333	5.61667	3.99	3.90667
				MD16G1100500				MD16G1100500	0.153333	0.693333	1.11	1.36
				MD00G1038400				MD00G1038400	13.36	7.52667	5.37	7.54333
				MD04G1128800				MD04G1128800	2.14	1.13667	0.813333	1.04
				MD12G1238900				MD12G1238900	0.136667	0.616667	1.29333	2.37667
				MD15G1433500				MD15G1433500	5.49333	2.68	1.89333	1.05
				MD04G1133600				MD04G1133600	9.49	5.16333	3.64667	3.69667
				MD10G1338100				MD10G1338100	0.103333	0.496667	0.49	0.52
				MD13G1096700				MD13G1096700	185.147	95.1133	66.6167	52.2567
				MD17G1095400				MD17G1095400	0.116667	0.546667	1.24	1.94333
				MD14G1188400				MD14G1188400	0.0933333	0.493333	0.586667	0.83
				MD12G1024600				MD12G1024600	4.75667	21.9667	23.7333	26.7833
				MD00G1014300				MD00G1014300	4.38	20.2533	23.81	37.88
				MD05G1340800				MD05G1340800	2.58667	12.09	15.5333	17.7967
				MD11G1123400				MD11G1123400	9.46667	5.59667	3.89667	3.59333
				MD15G1074800				MD15G1074800	49.5033	25.14	17.46	19.4533
				MD06G1039100				MD06G1039100	20.38	33.88	23.4267	21.85
				MD03G1010300				MD03G1010300	0.09	0.466667	0.24	0.48
				MD11G1109400				MD11G1109400	1.64667	7.8	15.6433	13.8333
				MD16G1131100				MD16G1131100	54.8667	33.1733	22.9633	23.6633
				MD14G1066000				MD14G1066000	24.7567	15.61	10.7967	9.63667
				MD07G1206200				MD07G1206200	1.74	2.73	1.87667	2.75667
				MD05G1329600				MD05G1329600	7.54667	4.69	3.22667	3.03
				MD11G1047400				MD11G1047400	1.86667	1.07333	0.74	0.816667
				MD16G1091200				MD16G1091200	18.01	85.3333	82.0233	37.9433
				MD13G1218400				MD13G1218400	0.186667	1.01	0.846667	1.03333
				MD08G1211100				MD08G1211100	16.07	25.23	17.22	22.2
				MD11G1110500				MD11G1110500	0.0866667	0.503333	0.716667	1.13667
				MD15G1032500				MD15G1032500	0.0933333	0.49	1.00333	0.686667
				MD05G1167400				MD05G1167400	0.29	1.53667	3.17667	5.55333
				MD14G1120000				MD14G1120000	0.256667	1.45333	2.10667	2.82667
				MD05G1207000				MD05G1207000	2.47333	1.33667	0.906667	1.02667
				MD02G1039800				MD02G1039800	7.57333	4.34333	2.95667	2.31
				MD10G1332400				MD10G1332400	339.78	170.053	115.367	51.9367
				MD04G1116200				MD04G1116200	3.98	2.15	1.46	1.55333
				MD15G1073900				MD15G1073900	0.37	2.10667	4.93	3.38667
				MD15G1120000				MD15G1120000	0.186667	1.05667	2.72	3.4
				MD00G1149300				MD00G1149300	9.65667	5.96333	4.03333	4.86333
				MD15G1351700				MD15G1351700	0.2	1.17333	0.766667	1.23667
				MD07G1296400				MD07G1296400	0.106667	0.626667	0.683333	0.97
				MD01G1118000				MD01G1118000	22.1933	13.71	9.23333	9.99667
				MD14G1123400				MD14G1123400	0.07	0.426667	0.4	0.393333
				MD11G1249400				MD11G1249400	3.17333	5.98667	3.99	6.04667
				MD12G1163000				MD12G1163000	1.23	7.33	7.7	9.63667
				MD15G1383700				MD15G1383700	0.126667	0.846667	1.17	2.28333
				MD04G1027800				MD04G1027800	0.783333	4.7	3.77333	2.73667
				MD03G1058400				MD03G1058400	85.7333	50.8133	33.5333	34.3733
				MD03G1290700				MD03G1290700	6.27333	3.64	2.39667	1.7
				MD11G1299600				MD11G1299600	6.42333	3.95	2.60667	2.14667
				MD06G1166400				MD06G1166400	17.2	30.54	19.9933	22.73
				MD08G1161700				MD08G1161700	10.22	5.65	3.71667	3.43
				MD05G1236300				MD05G1236300	15.7767	23.8533	15.62	18.54
				MD03G1138500				MD03G1138500	4.88333	2.91667	1.91	1.89333
				MD09G1032700				MD09G1032700	4.90667	2.68333	1.75333	2.15667
				MD15G1216500				MD15G1216500	0.203333	1.25667	2.66	6.30333
				MD17G1046600				MD17G1046600	9.94333	5.6	3.65	3.77667
				MD13G1074300				MD13G1074300	0.0733333	0.433333	0.416667	0.736667
				MD03G1029900				MD03G1029900	10.1567	6.29	4.06667	4.86333
				MD06G1098900				MD06G1098900	1.66	3.04333	1.96667	2.17333
				MD12G1163600				MD12G1163600	0.41	2.56333	1.70667	2.69
				MD12G1011500				MD12G1011500	0.0566667	0.393333	0.32	0.483333
				MD13G1234500				MD13G1234500	7.73333	4.91	3.16	3.54667
				MD01G1163900				MD01G1163900	46.2633	26.6933	17.16	14.8567
				MD06G1229100				MD06G1229100	0.303333	1.92667	2.92667	5.13333
				MD15G1027000				MD15G1027000	0.176667	1.16667	0.67	0.783333
				MD16G1082900				MD16G1082900	4.33	2.52	1.60333	1.06
				MD03G1227500				MD03G1227500	97.9067	634.673	1365.14	1339.51
				MD13G1127300				MD13G1127300	0.226667	1.61333	1.19667	2.41
				MD15G1248200				MD15G1248200	0.82	5.88667	4.67333	5.26333
				MD09G1162800				MD09G1162800	0.0866667	0.623333	0.423333	2.13333
				MD01G1230100				MD01G1230100	6.59	3.37333	2.12	2.07667
				MD17G1099500				MD17G1099500	9.41333	4.57667	2.87667	3.69667
				MD03G1006600				MD03G1006600	0.293333	2.24	1.36667	1.55667
				MD11G1074900				MD11G1074900	0.183333	1.44333	0.853333	1.1
				MD03G1019900				MD03G1019900	24.3733	13.63	8.42333	7.76667
				MD15G1271800				MD15G1271800	2	1.07	0.663333	0.563333
				MD04G1122800				MD04G1122800	2.18333	1.09333	0.673333	0.57
				MD00G1204600				MD00G1204600	2.72	1.60667	0.983333	0.673333
				MD09G1233400				MD09G1233400	0.456667	3.46667	4.42667	5.18333
				MD13G1042400				MD13G1042400	0.0666667	0.51	0.383333	1.22
				MD08G1172400				MD08G1172400	290.937	144.66	87.9833	63.87
				MD12G1163800				MD12G1163800	0.0333333	0.263333	0.173333	0.173333
				MD07G1258400				MD07G1258400	4.36	2.27	1.38	1.14667
				MD11G1009700				MD11G1009700	0.203333	1.64667	0.953333	1.32
				MD11G1252200				MD11G1252200	2.07333	1.10333	0.65	0.556667
				MD14G1014500				MD14G1014500	14.4133	21.1533	34.3533	37.58
				MD05G1073200				MD05G1073200	10.7333	15.7367	24.06	23.1867
				MD00G1133300				MD00G1133300	1.34667	10.4833	15.91	14.7467
				MD14G1126900				MD14G1126900	0.963333	7.75667	10.3867	11.5267
				MD05G1344300				MD05G1344300	5.39333	7.99	4.61667	4.50333
				MD12G1163700				MD12G1163700	0.0333333	0.323333	0.563333	0.366667
				MD12G1187100				MD12G1187100	2.96667	24.43	32.55	80.3767
				MD15G1098800				MD15G1098800	0.363333	3.15333	3.13667	9.41
				MD08G1210400				MD08G1210400	7.3	10.9567	6.81	7.94333
				MD16G1118600				MD16G1118600	10.7067	19.9667	11.3167	6.83333
				MD08G1070100				MD08G1070100	199.753	302.983	470.963	419.01
				MD05G1072400				MD05G1072400	25.1267	39.2633	66.13	40.8
				MD11G1014400				MD11G1014400	0.12	1.08	1.71667	1.82
				MD02G1050100				MD02G1050100	12.6633	20.43	29.6233	31.9567
				MD11G1191900				MD11G1191900	96.16	156.397	232.733	213.87
				MD05G1311900				MD05G1311900	29.05	48.2933	92.52	58.7567
				MD15G1393900				MD15G1393900	4.34333	7.19333	4.53333	5.22667
				MD03G1129600				MD03G1129600	0.0566667	0.566667	1.14667	1.32333
				MD05G1116600				MD05G1116600	165.017	276.86	472.953	508.79
				MD06G1127200				MD06G1127200	3.33333	5.64	3.15	2.07333
				MD04G1214500				MD04G1214500	1.06667	0.536667	0.3	0.3
				MD05G1327100				MD05G1327100	0.09	0.843333	0.933333	1.31
				MD05G1360600				MD05G1360600	90.7	153.703	234.393	219.373
				MD09G1022200				MD09G1022200	2.77	4.71333	7.54333	8.88333
				MD08G1046600				MD08G1046600	0.08	0.726667	0.75	1.83333
				MD15G1236600				MD15G1236600	52.9167	90.5267	149.177	155.753
				MD10G1330900				MD10G1330900	0.0933333	0.946667	0.786667	1.02
				MD10G1017300				MD10G1017300	82.1967	144.807	244.28	215.873
				MD12G1144800				MD12G1144800	1.89667	3.39	5.95667	7.11
				MD13G1010700				MD13G1010700	0.64	1.15667	0.68	0.81
				MD10G1126100				MD10G1126100	0.813333	1.48333	2.49667	3.10333
				MD13G1019900				MD13G1019900	4.12333	7.48	12.6467	13.0367
				MD10G1282200				MD10G1282200	0.236667	2.15667	4.14	3.79
				MD06G1223800				MD06G1223800	2.18	1.05	0.556667	0.426667
				MD02G1149600				MD02G1149600	0.0966667	1.02	0.533333	0.55
				MD17G1250000				MD17G1250000	81.3	147.027	239.107	357.407
				MD09G1183200				MD09G1183200	0.81	7.71333	9.77667	10.3933
				MD02G1025600				MD02G1025600	4.81667	8.68333	14.0467	17.7233
				MD11G1009500				MD11G1009500	2.80667	5.11	8.15	9.9
				MD04G1047700				MD04G1047700	214.927	390.75	738.843	1088.75
				MD08G1229100				MD08G1229100	19.02	34.9633	59.6	56.0167
				MD00G1189000				MD00G1189000	17.8367	32.9833	53.62	48.7433
				MD10G1311700				MD10G1311700	24.14	44.71	68.3667	72.8467
				MD15G1409700				MD15G1409700	11.5667	21.43	37.9467	36.9767
				MD03G1051900				MD03G1051900	0.0133333	0.153333	0.143333	0.23
				MD15G1253900				MD15G1253900	75.4833	144.893	348.67	482.083
				MD11G1222300				MD11G1222300	5.98333	11.5733	18.0333	19.7667
				MD00G1009000				MD00G1009000	5.79333	11.2633	16.3533	19.2033
				MD03G1256000				MD03G1256000	3.24	6.41333	11.2933	12.7033
				MD08G1028600				MD08G1028600	7.29333	14.5767	24.3833	37.88
				MD15G1062400				MD15G1062400	0.0733333	0.79	0.983333	1.02667
				MD11G1272300				MD11G1272300	1.42667	2.89	5.48	4.49333
				MD08G1236800				MD08G1236800	102.86	210.36	318.05	226.947
				MD09G1221600				MD09G1221600	1.7	3.54667	10.2433	10.0633
				MD11G1108700				MD11G1108700	13.81	28.64	46.85	45.3267
				MD14G1215700				MD14G1215700	0.84	1.78	4.02333	5.31667
				MD05G1065100				MD05G1065100	0.216667	2.15333	2.21333	3.20667
				MD07G1203700				MD07G1203700	5.03	10.9833	17.84	13.5
				MD06G1012300				MD06G1012300	0.47	1.07	1.91333	2.08333
				MD06G1203400				MD06G1203400	1.07	2.49667	0.943333	0.726667
				MD06G1054800				MD06G1054800	0.396667	0.94	2.00333	2.83667
				MD09G1032400				MD09G1032400	23.8667	241.617	308.063	318.563
				MD17G1113400				MD17G1113400	223.713	526.547	762.157	705.18
				MD08G1061900				MD08G1061900	0.51	1.24333	3.08333	4.07
				MD02G1275400				MD02G1275400	0.176667	1.88	1.3	0.75
				MD07G1269200				MD07G1269200	0.0233333	0.253333	0.193333	0.313333
				MD02G1068200				MD02G1068200	0.0333333	0.426667	0.426667	0.44
				MD16G1174800				MD16G1174800	0.313333	0.803333	1.71	2.39
				MD17G1077800				MD17G1077800	0.663333	1.81333	3.92667	6.00667
				MD06G1233400				MD06G1233400	3.31333	1.64	0.746667	1.72
				MD10G1310600				MD10G1310600	1.57667	4.40333	2.32667	3.01667
				MD03G1013700				MD03G1013700	0.0333333	0.503333	0.553333	0.82
				MD12G1165400				MD12G1165400	31.1367	87.33	133.03	169.673
				MD04G1212100				MD04G1212100	0.75	2.17	4.59667	3.81667
				MD03G1070900				MD03G1070900	0.0133333	0.253333	0.22	0.223333
				MD17G1078100				MD17G1078100	1.00333	2.87333	6.16	8.84667
				MD03G1161500				MD03G1161500	7.68333	22.0033	33.72	35.2733
				MD10G1315400				MD10G1315400	0.13	1.96	2.93333	4.17667
				MD02G1192600				MD02G1192600	223.303	653.94	1134.08	1158.15
				MD01G1161700				MD01G1161700	2.79333	8.68	14.8767	12.6567
				MD05G1074600				MD05G1074600	5.19333	16.4433	23.98	29.3567
				MD00G1033200				MD00G1033200	0.31	4.61333	5.6	9.76
				MD15G1303500				MD15G1303500	7.39	24.6967	40.3833	41.4067
				MD15G1012500				MD15G1012500	1.06667	3.89667	8.59	5.52333
				MD02G1013800				MD02G1013800	21.51	81.3967	228.507	251.73
				MD16G1129900				MD16G1129900	34.4033	140.137	297.627	305.1
				MD04G1020100				MD04G1020100	1.48	6.36	14.1467	18.0567
				MD10G1281800				MD10G1281800	0.19	3.13667	4.59	5.58333
				MD10G1261000				MD10G1261000	0.00666667	0.146667	0.19	0.22
				MD14G1176400				MD14G1176400	0.233333	1.26667	3.4	4.13667
				MD10G1120200				MD10G1120200	0.293333	1.79667	4.63	12.3333
				MD02G1118000				MD02G1118000	32.0733	194.523	329.417	418.707
				MD03G1254000				MD03G1254000	0.0333333	1.32667	5.03	0.243333
				MD10G1298100				MD10G1298100	0.0133333	0.59	0.0133333	0.726667
				MD03G1227300				MD03G1227300	36.8167	252.38	638.35	606.277
				MD00G1015800				MD00G1015800	0.556667	4.06	7.25	13.01
				MD15G1012300				MD15G1012300	1.44667	13.7767	29.4667	25.7433
				MD15G1279200				MD15G1279200	0.43	4.05333	8.62333	12.3167
				MD07G1240700				MD07G1240700	1.72667	19.5	166.16	214.053
				MD15G1264200				MD15G1264200	0.0133333	0.706667	0.313333	0.46
				MD07G1189600				MD07G1189600	0.936667	11.0633	24.7067	34.09
				MD15G1090700				MD15G1090700	0.16	2.61667	6.94667	11.5833
				MD05G1320800				MD05G1320800	0.0566667	0.85	3.84333	17.87
				MD02G1013500				MD02G1013500	0.04	1.01	3.23333	3.30333
				MD15G1021500				MD15G1021500	0.02	1.85667	7.59667	6.52333
				MD11G1109100				MD11G1109100	0.2	119.447	98.8467	291.857
								MD02G1175500	0.0333333	0.02	0.286667	0.6
								MD02G1035800	0.28	0.0133333	0.236667	0.4
								MD13G1076800	0.106667	0.04	0.433333	1.1
								MD16G1173500	0	0.0966667	0.76	2.69
								MD10G1330600	28.01	12.0133	38.3767	44.0367
								MD05G1169600	0.0166667	0.00666667	0.0566667	0.786667
								MD07G1201300	0.193333	0.116667	0.58	0.623333
								MD08G1086800	0.0633333	0.0666667	0.276667	0.39
								MD17G1074300	0.0566667	0.09	0.363333	0.606667
								MD17G1130400	0.0566667	0.31	1.17	4.71667
								MD05G1156100	0.213333	0.11	0.423333	0.606667
								MD09G1143800	0.146667	0.14	0.51	2.87667
								MD07G1298000	0.0733333	0.103333	0.366667	0.626667
								MD15G1060000	0.486667	0.386667	1.32333	1.45
								MD11G1309800	0.126667	0.0766667	0.266667	0.43
								MD04G1197700	0.22	0.106667	15.8933	5.54
								MD13G1172100	0	0.153333	0.506667	2.01667
								MD11G1251800	0.0966667	0.116667	0.356667	0.526667
								MD11G1079600	0.0233333	0.0133333	0.0566667	0.436667
								MD09G1019900	0.0533333	0.0333333	0.106667	0.546667
								MD15G1269500	1.16	0.64	1.59	1.53
								MD17G1017000	1.74667	0.97	0.266667	0.08
								MD08G1095100	0.11	0.31	0.836667	1.33333
								MD09G1220200	0.41	0.356667	0.966667	1.29667
								MD07G1216200	0.0566667	0.176667	0.46	1.06333
								MD07G1291000	0.42	0.583333	1.36667	1.99667
								MD15G1216400	0.856667	1.69333	3.95	6.83333
								MD04G1064400	0.0433333	0.193333	0.466667	1.89333
								MD15G1372400	0.0266667	0.13	0.3	0.71
								MD01G1207200	0.05	0.0266667	0.0666667	0.306667
								MD11G1028200	0.47	0.51	1.12333	1.6
								MD16G1106000	0.143333	0.2	0.436667	0.51
								MD06G1125700	0.176667	0.276667	0.61	0.89
								MD07G1304200	0.386667	0.613333	1.34	1.74667
								MD11G1239100	0.246667	0.493333	1.07333	1.25333
								MD10G1075200	12.14	7.55333	1.15667	1.18667
								MD01G1120400	3.99333	4.00333	8.31333	16.2333
								MD06G1195100	0.166667	0.52	1.08333	3.52
								MD15G1095200	0.306667	0.336667	0.693333	1.23333
								MD14G1224900	0.0533333	0.15	0.31	0.826667
								MD13G1116100	7.32	4.72667	2.56333	2.19667
								MD12G1042100	11.75	7.60667	3.81333	2.18667
								MD04G1173600	0.206667	0.553333	1.11333	2.69
								MD04G1172200	0.726667	0.666667	1.33333	1.79
								MD03G1211200	0.0966667	0.0366667	0.07	0.166667
								MD07G1173600	0.256667	0.256667	0.506667	0.613333
								MD11G1054000	0.11	0.256667	0.496667	0.76
								MD02G1080400	0.116667	0.253333	0.493333	0.783333
								MD17G1025400	0.976667	1.15	2.19667	2.19333
								MD17G1143900	0.0533333	0.0366667	0.0766667	0.26
								MD13G1071600	0.343333	0.0966667	0.196667	0.61
								MD03G1040100	17.6567	11.86	20.2667	18.6067
								MD06G1054900	1.54333	2.37333	4.49667	4.81
								MD05G1054800	65.15	40.4633	76.89	116.807
								MD12G1264200	12.83	9.16667	4.92333	4.06
								MD14G1133400	2.06	1.5	0.55	0.473333
								MD17G1222500	14.45	10.51	6.11667	4.99667
								MD15G1325900	19.7433	14.5333	8.42	9.23
								MD16G1056200	8.86667	6.55	3.94333	2.92667
								MD00G1166100	1.32333	1.72	3.15	3.90667
								MD08G1032900	26.0767	19.3467	12.26	12.33
								MD13G1081900	0.54	1.05667	1.94	4.16333
								MD11G1237400	1.46	1.13	2.04333	4.06667
								MD10G1152100	1.66333	1.50333	2.67667	3.24333
								MD07G1182500	0.563333	0.513333	0.923333	1.10333
								MD14G1242700	3.20667	3.41	6.02667	10.5333
								MD02G1207900	0.15	0.0766667	0.14	0.583333
								MD12G1062100	1.91	1.48667	0.546667	0.346667
								MD07G1153300	3.64	2.85	1.28667	1.41667
								MD08G1095300	0.0733333	0.103333	0.186667	0.896667
								MD15G1191800	20.88	16.4333	9.28	6.84
								MD13G1065600	3.18333	4.92	8.51333	8.74667
								MD09G1116500	0.236667	0.75	1.29667	2.49
								MD05G1028100	178.263	140.917	241.977	380.387
								MD14G1041300	5.3	4.19333	1.67333	1.48
								MD10G1029100	0.97	0.763333	2.86	4.56
								MD03G1062400	0.0733333	0.116667	0.203333	0.403333
								MD06G1160900	567.303	472.303	687.817	707.4
								MD15G1404400	1.34	1.13	1.9	2.18
								MD09G1036900	0.466667	0.656667	1.11667	2.18333
								MD06G1128500	13.95	11.8933	7.21667	6.99333
								MD04G1131700	0.87	0.79	1.33333	2.06333
								MD14G1142700	10.4867	8.87333	15.07	16.98
								MD04G1138500	14.59	12.5133	7.74333	5.81333
								MD05G1139400	7.39333	6.38667	9.86	9.32333
								MD15G1168500	14.0733	12.2867	7.17667	5.74
								MD12G1089500	18.57	28.6067	47.5667	116.633
								MD02G1201500	1.34	1.58	2.61667	3.96
								MD12G1057800	3.99	2.42667	4.02667	4.22
								MD12G1259500	47.5767	42.2667	24.0867	16.0333
								MD03G1277900	43.8467	39.1267	21.8267	12.2267
								MD12G1058400	10.63	9.45333	5.32333	4.47333
								MD15G1182500	0.586667	0.93	1.54	2.82
								MD16G1053900	0.403333	0.413333	0.683333	1.08333
								MD08G1189500	0.103333	0.06	0.103333	1.02333
								MD03G1278400	3.96667	3.55	6.35333	8.10333
								MD02G1026300	2.72667	3.93333	6.44667	8.31667
								MD08G1124700	161.777	145.437	221.437	226.47
								MD01G1063400	0.123333	0.126667	0.21	0.453333
								MD03G1022000	0.31	0.316667	0.506667	0.68
								MD08G1027400	5.03	4.58667	2.72667	2.15
								MD17G1035400	17.3133	15.7567	6.71	6
								MD16G1070600	0.0366667	0.13	0.21	5.18667
								MD02G1175400	0.03	0.12	0.19	0.793333
								MD08G1022400	35.63	32.5333	15.0867	8.62
								MD17G1011500	0	0.0333333	0.0566667	0.47
								MD12G1113000	1.74333	2.37333	3.82667	6.06
								MD16G1011800	3.75333	4.11	6.60667	7.07
								MD13G1010600	1.89333	2.07333	3.31667	3.94333
								MD16G1196800	0.0466667	0.03	0.0533333	1.14667
								MD10G1300700	19.22	17.88	29.5033	30.7967
								MD08G1066400	22.9133	21.3567	12.3533	10.8367
								MD11G1244800	2.46667	1.4	2.20333	2.98
								MD15G1360600	11.69	11.11	6.94	6.34
								MD02G1292200	58.3467	36.44	56.3833	102.323
								MD08G1112700	3.72667	3.54333	2.16333	1.95
								MD06G1077800	1.73333	1.86667	2.88667	3.35
								MD12G1119900	4.33	4.16333	2.57333	2.40333
								MD16G1000500	17.6533	17.3167	31.69	27.3033
								MD02G1004100	4.15333	3.80667	5.88	6.94667
								MD04G1225400	15.59	18.5433	28.61	64.59
								MD15G1206800	3.76	3.69667	6.18333	7.3
								MD02G1130700	5.88667	5.13333	7.86	8.35333
								MD08G1037600	10.3667	10.2533	17.13	18.82
								MD13G1042700	0.123333	0.186667	0.28	0.913333
								MD16G1165100	3.28667	3.89	5.94	6.75667
								MD01G1153400	19.5367	19.3167	10.55	11.2333
								MD12G1153900	16.9567	16.7633	8.11	7.46333
								MD06G1009800	2.22	2.19333	1.2	1.26
								MD07G1268700	0.67	0.533333	0.816667	0.896667
								MD11G1227900	5.00333	6.42	9.66667	10.0667
								MD04G1064200	1.19667	4.99333	7.57333	23.3367
								MD13G1210400	11.1933	9.46	14.22	14.0633
								MD06G1226800	2.27	2.31	1.29667	1
								MD15G1023100	4.47333	4.51	2.78	2.69333
								MD11G1200400	8.72	10.51	15.66	18.6467
								MD00G1116600	0.14	0.0566667	0.09	0.6
								MD06G1105500	2	2.01333	3.83	4.6
								MD07G1051800	0.566667	1.01	1.50333	2.47667
								MD10G1333200	67.3467	68.8667	31.84	38.48
								MD06G1134100	176.663	148.893	220.46	240.747
								MD11G1298900	6.33333	6.52	11.2733	10.4133
								MD08G1005500	11.12	11.3767	28.1833	28.1967
								MD11G1189000	26.58	38.9133	57.4333	190.73
								MD10G1050200	11.2033	10.2167	14.9833	19.5733
								MD16G1064200	155.017	161.377	253.68	278.21
								MD13G1086700	1.08667	1.14	2.51667	3.08
								MD17G1148400	3.08667	3.71333	5.44333	6.24333
								MD14G1002500	202.06	210.283	112.913	84.1167
								MD15G1273300	20.5633	21.5833	42.1933	45.0467
								MD15G1153500	12.7567	13.42	22.7167	30.26
								MD16G1043700	0.2	0.45	0.66	1.21667
								MD17G1048300	1.00333	1.34333	1.96333	2.4
								MD13G1174500	9.41	10.95	15.92	16.85
								MD08G1038900	0.426667	0.476667	0.693333	0.916667
								MD05G1069700	2.76333	3.87667	5.6	7.9
								MD09G1184000	2.77	5.02667	7.31333	13.4267
								MD05G1010400	16.7	12.3	17.7533	22.24
								MD14G1004000	74.43	65.93	95.5367	102.79
								MD14G1038200	0.693333	0.81	1.18	1.65333
								MD03G1198900	8.19667	6.41667	9.25	12.4467
								MD13G1231900	1.05333	0.97	1.4	1.80667
								MD07G1184000	0.733333	0.776667	0.146667	0.18
								MD01G1177200	7.03333	6.31333	9.03667	9.84
								MD04G1018400	24.9633	32.9867	47.4733	131.707
								MD02G1300300	0.626667	0.79	1.12333	1.58333
								MD15G1104100	4.6	4.71333	6.73	8.75
								MD07G1077900	0.416667	0.466667	0.666667	1.38333
								MD16G1117500	1.93667	1.89	2.68667	3.04667
								MD15G1287300	1.55333	2.17	3.10333	4.29667
								MD02G1312100	1.30333	1.9	2.71	3.39
								MD00G1165100	21.5533	18.65	26.4433	29.6667
								MD14G1044500	76.82	73.72	104.553	106.933
								MD03G1183400	6.24	8.81333	12.41	14.6867
								MD06G1103400	6.62333	3.29667	4.69333	7.60667
								MD17G1189400	18.27	23.4133	33.08	35.9867
								MD02G1180400	13.4967	16.1567	22.75	26.5433
								MD00G1115700	39.03	43.8867	61.7133	64.59
								MD09G1276300	2.55333	2.81667	3.95	6.15333
								MD17G1075600	18.41	22.2833	31.22	34.66
								MD16G1131300	6.52667	6.24667	8.71333	9.82
								MD14G1239500	2.42667	2.98667	4.15333	6.88
								MD12G1147300	9.89667	9.37667	13.0867	14.5833
								MD07G1060000	0.216667	0.59	0.82	1.92667
								MD10G1292500	42.2967	43.39	60.2267	67.1467
								MD10G1108800	0.796667	1.17	1.62	0.413333
								MD01G1140200	3.67333	5.16667	7.15333	8.96
								MD15G1257500	13.97	15.2767	21.1833	27.91
								MD16G1238400	53.9267	71.55	98.84	106.553
								MD08G1186700	2.15	1.55333	2.15667	3.9
								MD04G1058200	7.92333	5.41	7.45667	8.26667
								MD01G1174400	0.69	0.433333	0.596667	0.966667
								MD14G1005700	42.4133	34.3667	47.0567	52.8667
								MD13G1230800	0.196667	0.26	0.353333	0.806667
								MD13G1231400	123.067	86.1367	117.857	126.993
								MD11G1113800	0.716667	1.2	1.63333	2.17
								MD07G1292700	11.11	11.7167	5.61333	3.80667
								MD05G1106800	1.30333	1.59333	2.16667	4.23667
								MD12G1191100	3.09333	3.45667	4.68667	5.31667
								MD14G1177900	0.13	0.463333	0.623333	1.77667
								MD01G1199000	34.5433	46.7967	63.53	77.8433
								MD12G1223900	1.44667	1.60667	2.18667	2.87
								MD15G1067100	1.54333	1.83333	2.49667	3.17333
								MD15G1353800	24.89	26.3933	35.8933	47.7067
								MD14G1238700	1.37333	1.94	2.63	3.69
								MD16G1079400	81.0367	74.83	101.207	112.59
								MD09G1117300	5.36333	5.67667	7.67	8.71333
								MD02G1062900	137.71	191.377	257.47	294.873
								MD12G1218200	4.79333	5.12667	6.90333	9.91667
								MD08G1218900	10.08	7.79333	10.52	17.8933
								MD01G1140100	4.55	5.05	6.78333	7.59667
								MD02G1175800	23.1767	30.4467	40.77	44.9367
								MD07G1203100	7.83667	8.09667	10.8867	12.7933
								MD15G1407600	212.607	179.237	240.047	309.367
								MD05G1363600	0.87	0.78	1.05	1.45667
								MD08G1028100	2.17	1.14	1.51667	2.36
								MD02G1127400	0.32	0.226667	0.31	0.523333
								MD17G1137300	8.34	6.68333	8.89	10.4567
								MD00G1192900	32.2467	34.0967	20.93	20.42
								MD04G1011700	0.476667	0.706667	0.936667	1.51333
								MD03G1288700	12.1467	11.8667	15.82	22.9167
								MD02G1026200	2.07	2.92667	3.89	6.56667
								MD14G1162400	11.4933	10.68	14.18	17.6167
								MD05G1320600	8.37667	11.43	15.13	18.4433
								MD04G1069300	12.5533	13.83	18.3167	20.69
								MD09G1035000	8.71667	12.24	16.2	17.9833
								MD03G1238700	1.86	2.9	3.81667	5.36
								MD12G1001900	1.72333	1.82	0.853333	0.796667
								MD03G1021800	0.16	0.13	0.17	0.333333
								MD03G1157200	2.22667	2.90333	3.80667	4.92
								MD14G1079900	1.53667	1.6	2.09	9.28667
								MD05G1220500	15.8167	18.12	23.66	26.3533
								MD03G1254900	2.96333	4.25333	5.54	6.39333
								MD17G1240700	4.15333	5.08667	6.63667	7.99
								MD16G1265900	50.9067	66.3333	86.4333	111.307
								MD17G1212300	0.43	0.25	0.326667	0.87
								MD15G1360000	84.8767	60.8067	79.2333	88.2967
								MD01G1213300	32.9733	30.5433	39.82	105.663
								MD00G1051500	40.8433	35.9167	46.7733	20.3367
								MD15G1024100	17.9333	12.3467	16.0833	28.3467
								MD13G1161100	3.43	4.17333	5.42	9.08667
								MD10G1266100	3.51333	4.23	5.48667	7.21
								MD07G1228300	3.90333	4.36	5.64	7.24333
								MD07G1308000	0.593333	0.163333	0.213333	0.996667
								MD02G1069500	15.9	15.8433	20.53	32.6867
								MD09G1054700	36.07	38	49.1433	61.2767
								MD14G1147900	10.7933	14.7467	19.0233	22.5233
								MD08G1050600	0.673333	0.87	1.12667	2.13667
								MD05G1094500	21.8467	28.3233	36.4167	41.0467
								MD11G1207500	8.43	8.25	10.6267	12.7
								MD10G1123500	0.98	1.29	1.65	2.35333
								MD14G1151700	15.75	17.88	22.8667	29.71
								MD03G1134300	7.92	8.33667	10.6567	12.26
								MD14G1041200	10.71	10.25	13.09	16.72
								MD15G1084100	9.64667	13.0067	16.6233	20.7367
								MD11G1017400	4.02	4.65333	5.91	6.97
								MD08G1050700	0.406667	0.48	0.61	1.14667
								MD04G1212300	20.6167	19.2267	24.47	28.4333
								MD12G1228800	0.0933333	0.09	0.116667	0.723333
								MD09G1061000	0.22	0.586667	0.733333	2.34
								MD03G1292200	2.95667	2	2.54667	3.62
								MD09G1126900	15.29	12.8867	16.32	20.2033
								MD15G1444700	6.23	4.3	5.44667	7.35667
								MD02G1128300	0.293333	0.48	0.603333	1.07667
								MD09G1162900	0.0166667	0.31	0.4	4.43333
								MD13G1189100	1.55	1.68	2.13	3.39
								MD05G1028500	8.64333	12.0333	15.1467	19.5067
								MD02G1316800	19.0567	24.1267	30.3433	35.6167
								MD17G1139500	16.4833	13.8933	17.4333	20.8233
								MD02G1198700	2.69333	3.22	4.03	4.79333
								MD11G1020900	1.95667	2.43667	3.06333	4
								MD17G1239600	11.7567	15.69	19.6933	24.6067
								MD13G1179600	15.4067	10.6533	13.3267	17.09
								MD15G1084200	1.51333	1.54	1.94	2.60333
								MD17G1272400	108.293	125.447	156.617	195.27
								MD14G1228100	8.83333	7.68	9.58333	12.7633
								MD17G1058100	12.1067	12.84	16.0033	18.8667
								MD15G1348800	11.4167	15.85	19.7367	28.6833
								MD05G1082200	3.12	2.80667	3.48667	4.5
								MD13G1070200	0.0333333	0.0766667	0.0966667	4.30333
								MD10G1080000	64.4067	92.1467	114.223	149.053
								MD09G1217300	1.86333	1.81667	2.24333	2.86667
								MD01G1162100	102.697	114.743	142	169.14
								MD06G1100000	6.62	8.14667	10.0967	12.1167
								MD15G1343900	5.93333	5.59333	6.88667	10.9333
								MD13G1012600	1.03333	1.13333	0.406667	0.443333
								MD14G1070300	22.0867	27.2233	33.51	41.65
								MD07G1198700	5.13333	4.65333	5.69667	7.27
								MD05G1294300	0.66	0.826667	1.02	1.76333
								MD09G1098900	1.79333	1.80333	2.20667	2.98667
								MD04G1137400	3.60667	4.84	5.86667	8.13
								MD12G1136700	4.86333	4.69333	5.7	6.94333
								MD08G1031300	4.17	4.97	6.04	7.9
								MD17G1286800	7.52667	6.41667	7.78333	9.58667
								MD13G1042500	0.506667	0.416667	0.51	1.86
								MD15G1149900	2.48	2.72333	3.29667	4.02333
								MD12G1099800	68.7633	48.2533	58.26	75.79
								MD04G1060700	23.68	30.0233	35.9833	46.5
								MD06G1052700	5.37333	7.77333	9.34	11.31
								MD15G1324500	4.05	5.35	6.40333	8.03333
								MD08G1101700	9.32	8.27	9.96	12.82
								MD12G1037000	3.61333	3.83333	4.59667	6.39333
								MD08G1080600	4.79667	4.41333	5.27	6.6
								MD13G1033600	8.19	11.4033	13.61	18.7067
								MD11G1192000	24.1933	27.5167	32.81	44.4467
								MD15G1349000	8.03333	10.6033	12.6433	20.45
								MD13G1029700	12.44	15.6733	18.6833	25.0033
								MD15G1215500	0.733333	0.52	0.62	1.83
								MD12G1245900	26.2733	25.9067	30.7233	38.4067
								MD07G1270900	1.36333	1.57667	1.87333	4.21667
								MD02G1099800	22.4233	26.37	31.2933	42.72
								MD13G1087900	0.696667	0.68	0.803333	1.42
								MD10G1065900	0.643333	0.836667	0.983333	1.44
								MD16G1165000	20.3133	25.2667	29.5333	39.8733
								MD11G1242900	0.6	0.42	0.49	1.3
								MD01G1185500	14.2367	8.76	10.2133	15.4167
								MD14G1223700	3.06667	6.03667	7.00667	17.0933
								MD05G1143000	30.3733	28.7	33.2533	41.8333
								MD15G1170100	11.7733	18.0433	20.9333	28.86
								MD13G1209700	3.30333	2.60333	3.01667	3.98
								MD09G1291500	2.57333	3.11667	3.59	4.64667
								MD11G1070800	6.83667	4.28333	4.92333	7.25667
								MD15G1015100	3.41667	3.56667	4.10667	5.38333
								MD17G1107200	7.77667	7.15667	8.26667	11.39
								MD12G1125800	1.03	0.996667	1.15	1.65667
								MD15G1438300	14.6867	12.9033	14.7933	7.71333
								MD05G1103600	4.25333	3.98333	4.55333	6.35667
								MD17G1045300	34.5833	43.0367	49.42	68.7133
								MD11G1250400	2.57667	3.41333	3.88333	5.22
								MD11G1294000	2.13	2.02333	2.30667	4.90333
								MD17G1066700	3.71667	4.65	5.29333	7.33667
								MD11G1123900	1.29667	1.78333	2.02667	3.06333
								MD06G1008700	58.6733	71.32	80.6967	118.373
								MD15G1372600	7.79333	6.86667	7.79667	13.2933
								MD12G1233500	6.27667	8.97	10.1233	14.55
								MD15G1266500	25.0433	27.21	15.6567	13.5033
								MD17G1066000	0.0333333	0.07	0.0766667	1.02333
								MD17G1104000	0.433333	0.87	0.97	2.95667
								MD16G1018100	3.43333	3.97333	4.42667	5.78333
								MD17G1209200	27.8733	35.8767	39.9167	53.4033
								MD15G1329500	4.13333	3.58	3.92667	1.59667
								MD12G1103600	1.64	1.79	1.96333	2.78333
								MD10G1274200	7.14	9.26333	10.1867	14.3267
								MD06G1209100	0.446667	0.55	0.6	1.04667
								MD12G1231600	155.387	130.447	142.507	75.6833
								MD14G1223600	2.96333	4.42	4.80333	14.82
								MD15G1136400	1.01	1.30333	1.41	2.24333
								MD15G1390700	5.96667	6.18	6.69333	9.30667
								MD06G1118700	44.3433	32.4067	35.1467	48.1567
								MD12G1194700	1.63	1.71	1.84667	2.81333
								MD08G1001300	5.15667	5.63667	2.29333	1.56333
								MD03G1233100	0.853333	0.866667	0.936667	1.51667
								MD11G1103100	0.246667	0.33	0.35	0.703333
								MD14G1242900	0.186667	0.37	0.393333	0.89
								MD13G1285100	36.6867	16.9033	17.81	40.8467
								MD06G1104100	2.93333	3.90667	4.09667	6.52
								MD06G1079300	0.983333	0.896667	0.926667	1.54
								MD15G1400400	4.75	5.18667	5.34333	2.34
								MD15G1059100	13.8267	16.1367	16.64	24.05
								MD07G1153200	0.36	0.716667	0.746667	2.73333
								MD10G1077100	5.66667	7.56	7.78333	11.6733
								MD09G1115100	8.25	5.46333	5.62333	8.96667
								MD15G1348900	8.79	10.9733	11.25	24.11
								MD12G1012300	18.1833	19.0667	19.4133	10.8933
								MD05G1226500	2.89667	3.15667	1.38	1.47667
								MD17G1030100	7.12	6.66667	6.82667	10.79
								MD04G1204500	6.5	8.36	8.51667	13.1767
								MD11G1007900	0.51	0.5	0.51	0.106667
								MD14G1001600	8.42667	9.25667	5.11667	4.73667
								MD03G1134800	1.81333	1.73	1.76	4.55
								MD15G1153000	8.08	8.23667	8.32667	12.65
								MD03G1213800	46.8433	36.5167	36.7833	22.26
								MD06G1105900	0.27	0.273333	0.273333	1.05333
								MD16G1050500	364.63	433.593	432.73	225.387
								MD05G1335600	5.83	4.61333	4.63667	9.16333
								MD11G1109200	55.3367	52.0167	51.99	27.3067
								MD05G1337400	3.24667	4.13333	4.14	7.21
								MD04G1147700	0.1	0.176667	0.176667	0.943333
								MD14G1070200	17.2733	22.8267	22.48	35.57
								MD09G1029300	10.24	7.69667	7.58667	4.16667
								MD03G1146300	16.6333	18.37	9.16333	10.4233
								MD16G1050600	182.69	183.557	179.773	96.49
								MD10G1110000	196.13	161.4	157.7	95.8767
								MD13G1041800	21.7833	20.97	20.38	12.2367
								MD15G1280500	5.11667	5.68667	5.49	3.45667
								MD13G1049600	317.127	361.63	347.297	211.16
								MD17G1045600	1.77	1.36	1.30667	2.30667
								MD03G1105400	25.3367	16.5033	15.76	10.5633
								MD17G1099200	16.38	15.9033	15.02	24.6833
								MD01G1040300	0.0866667	0.19	0.176667	0.69
								MD14G1080000	1.16667	1.18333	1.11	6.82
								MD03G1128900	152.497	150.747	140.957	72.32
								MD01G1201900	0.176667	0.746667	0.7	5.13
								MD16G1092700	21.9233	24.3967	39.67	37.1533
								MD15G1359900	20.99	16.6267	15.24	26.8333
								MD00G1012200	3.36667	2.36333	2.15	1.31667
								MD08G1133500	8.2	9.20667	14.23	13.4967
								MD01G1139700	7.23	5.01333	4.54	3.04333
								MD13G1024600	9.12333	7.70333	6.98333	4.73333
								MD04G1072900	29.3067	24.7233	22.4233	12.9333
								MD07G1176400	4.81333	5.09	4.58333	3.04333
								MD03G1073600	0.00666667	0.0366667	0.03	0.41
								MD02G1178300	29.15	36.6433	32.85	23.3767
								MD05G1072500	3.44333	2.69333	2.39333	1.54
								MD00G1015500	3.48667	2.90333	2.61	1.5
								MD07G1034400	0.806667	1	0.88	5.76333
								MD00G1037100	1.04667	1.31333	1.16	5.38667
								MD08G1086300	3.88	3.65667	3.22667	1.47333
								MD01G1236300	4.65333	1.91	1.67333	5.00333
								MD12G1036700	7.2	7.98333	6.89333	4.33
								MD05G1099400	0.31	0.73	0.623333	2.01333
								MD02G1085100	3.91667	2.61	2.25	1.51333
								MD13G1049500	780	870.38	745.743	514.017
								MD15G1355100	6.75667	4.31667	3.71333	9
								MD16G1259000	3.67667	3.77667	3.24333	1.50667
								MD04G1147900	0.153333	0.146667	0.123333	0.636667
								MD15G1120300	9.7	8.28667	7.04333	4.31333
								MD17G1022000	5.27	4.24	3.59667	2.66333
								MD16G1253900	11.3833	11.19	9.49	6.65333
								MD02G1113800	18.2533	12.33	10.3967	7.90333
								MD02G1057200	9.79333	8.78	7.34333	5.43333
								MD16G1064400	3.28333	3.73	29.23	15.69
								MD01G1027200	53.6933	44.6467	37.0933	27.2567
								MD14G1233100	8.39667	9.17333	7.54667	5.03333
								MD15G1139800	39.6367	45.3833	28.9733	21.3467
								MD10G1334300	22.55	31.48	26.1033	19.7333
								MD09G1257800	8.84667	7.49	6.19667	4.05
								MD00G1069800	27.18	19.8267	16.3967	10.07
								MD07G1268200	85.1733	57.6567	47.42	30.37
								MD01G1122900	18.1467	25.68	21.1	13.1233
								MD15G1081300	0.05	0.113333	0.0933333	0.533333
								MD17G1190000	2.99667	3.85	3.12667	1.98
								MD05G1034200	5.56333	6.34667	5.20333	3.67667
								MD03G1026700	4.76333	3.70333	3.01667	1.89
								MD11G1041800	45.4433	43.6	35.4	25.8767
								MD13G1150700	21.6167	17.8833	14.5267	11.4333
								MD04G1126500	4.11667	5.4	4.38333	3.23333
								MD10G1165600	7.46	7.27	5.88	3.90667
								MD04G1112600	10.5867	10.9633	8.86333	6.28
								MD10G1014200	3.72333	4.50333	3.62667	2.34
								MD06G1119300	7.18	5.71667	4.56667	2.62667
								MD12G1066400	2.17667	2.56333	2.04667	1.31667
								MD10G1035600	13.7267	18.99	15.1067	9.34
								MD10G1195400	1.95667	2.15667	1.71333	1.21667
								MD08G1125400	9.65	10.41	8.27	5.52
								MD17G1202000	4.45	3.15333	2.50333	1.81333
								MD01G1213100	13.3033	7.50667	5.95	34.32
								MD10G1196300	140.803	114.863	91.0467	59.01
								MD08G1048900	2.93333	3.91667	3.08667	2.01667
								MD13G1041900	9.88333	10.9633	8.57333	6.11667
								MD05G1136800	2.22	2.48333	1.94667	1.37333
								MD01G1146800	23.35	18.2467	14.2933	10.3133
								MD09G1116400	0.05	0.0266667	0.02	0.336667
								MD15G1126600	2.26667	1.59	1.24333	0.643333
								MD11G1022500	0.123333	0.14	0.11	0.0466667
								MD05G1172700	34.5267	39.8433	30.9433	24.3133
								MD11G1216500	11.4667	9.44	7.32333	6.00333
								MD15G1102300	3.53667	3.52333	2.73	1.73333
								MD14G1066100	2.81667	2.26	1.74	1.21667
								MD10G1035700	29.59	41.55	31.9433	23.5967
								MD10G1333300	174.543	160.847	124.177	93.4433
								MD02G1141700	4.11	3.73333	2.85667	2.14
								MD04G1187700	23.9667	28.7667	21.8733	15.7267
								MD07G1135000	14.6467	16.92	24.6333	29.3867
								MD17G1061600	3.54667	2.70333	2.05333	1.57333
								MD07G1205300	5.07333	4.81	3.64667	2.94667
								MD13G1097000	2.29667	2.66667	1.39333	1.28
								MD05G1363200	2.01	1.49333	1.12667	0.816667
								MD11G1099200	27.1367	21.6233	16.3267	11.8067
								MD04G1243400	7.24667	6.48	4.89667	3.92333
								MD11G1313400	3.42	2.24	1.68	4.36333
								MD11G1304000	7.45333	5.24667	3.93667	2.97333
								MD00G1089600	19.6067	17.2667	12.8867	10.9233
								MD11G1235900	2.82667	2.70333	2.02	1.69333
								MD05G1086300	41.6567	31.66	23.7133	18.3067
								MD02G1168000	4.89	6.12	4.53667	3.59
								MD03G1110000	11.8767	10.2733	7.64	5.61667
								MD10G1071200	75.2367	78.4633	58.3433	47.5
								MD06G1033100	36.3567	40.6167	30.1267	23.5267
								MD05G1184800	1.50333	1.44667	1.07	0.573333
								MD13G1089700	0.316667	0.366667	0.27	0.883333
								MD12G1100900	8.95	10.4367	7.71	4.62667
								MD03G1281500	69.51	48.0633	35.4467	26.14
								MD06G1098100	2.29	1.95333	1.43333	1.06
								MD02G1157100	4.86	3.25333	2.38667	1.97667
								MD08G1033000	44.9967	28.3767	20.7167	16.1267
								MD05G1306600	4.72	3.2	2.32667	1.91
								MD02G1284000	5.66333	4.52667	3.27667	2.68667
								MD05G1039600	3.95333	3.44667	2.48	1.94
								MD10G1309200	7.95333	8.36667	5.99	5.23
								MD14G1179400	59.7467	44.97	32.2633	27.38
								MD03G1068900	3.53333	3.41667	2.43667	1.56333
								MD16G1018000	37.6933	35.4433	25.2367	21.9333
								MD07G1295200	4.27667	4.40667	3.13667	2.38333
								MD17G1117000	15.6633	16.29	11.5767	7.67333
								MD03G1177200	8.69	6.34	4.51333	3.82667
								MD11G1109700	15.2967	10.17	7.22667	5.75333
								MD10G1056900	1.69	1.81667	1.28667	1.14
								MD10G1307900	9.83333	8.50667	6.00333	3.83
								MD10G1305000	41.3433	39.0267	27.45	17.2633
								MD07G1299200	72.6567	52.4867	36.6967	25.23
								MD08G1140900	28.79	23.8133	16.64	13.3833
								MD15G1180700	5.48333	5.35333	3.73333	3.17
								MD07G1305300	44.7767	49.99	34.8833	29.02
								MD04G1175400	4.02333	4.97667	3.47667	2.22667
								MD11G1143500	165.21	120.333	83.6967	65.5633
								MD06G1148800	4.69333	4.94	3.42667	2.19333
								MD06G1173800	3.21333	2.27	1.58333	1.23667
								MD17G1189100	3.67	4.43	3.05333	2.26
								MD07G1018400	2.89333	1.88333	1.3	0.906667
								MD10G1078100	13.8767	10.9533	7.59333	4.16333
								MD12G1233400	75.7267	88.2267	60.8833	54.2933
								MD16G1007000	1.18333	1.55	1.07	0.68
								MD05G1006800	28.3833	18.7033	12.9467	9.21333
								MD08G1041400	3.33667	3.37333	2.31	2.14333
								MD14G1090900	0.68	0.783333	0.536667	0.37
								MD03G1118500	7.95667	6.17667	4.23333	3.37667
								MD14G1102600	2.03	1.19667	0.82	0.403333
								MD17G1260800	4.32	2.97333	2.02	0.966667
								MD16G1027000	36.89	43.1367	24.62	24.7167
								MD10G1072700	5.47667	4.42667	3.01333	1.97667
								MD01G1198900	24.34	24.7567	16.6367	12.6233
								MD05G1176100	11.0967	7.29	4.90667	2.96333
								MD09G1035100	41.32	28.9467	19.41	16.4967
								MD12G1178800	23.0833	16.0533	10.74	7.76
								MD07G1286500	5.14333	3.96333	2.63667	2.11333
								MD08G1112900	2.78667	2.8	1.85667	1.63333
								MD03G1117900	221.24	158.807	105.233	100.96
								MD03G1001300	3.55333	4.15333	2.07667	2.18333
								MD13G1052700	6.26667	5.17667	3.39667	2.52
								MD09G1032900	310.797	192.137	126.653	83.1033
								MD04G1243800	1.71333	1.89667	1.24667	0.71
								MD17G1238600	0.586667	0.606667	0.396667	0.08
								MD05G1335100	4.96	3.51333	2.30667	2.05
								MD09G1170800	2.04333	2.06667	1.35333	1.31667
								MD13G1169800	2.00667	1.52	0.993333	0.39
								MD04G1134100	11.2167	7.70333	5.04	4.62333
								MD15G1415100	60.2633	55.3133	35.73	30.1733
								MD15G1351800	10.9633	15.6533	10.0467	9.15667
								MD04G1046000	2.56	1.83	1.17	0.76
								MD15G1294700	0.576667	0.683333	1.50667	2.41
								MD07G1027000	30.3467	36.4933	53.4167	53.3667
								MD15G1147800	0.323333	0.393333	1.13333	1.64667
[truncated: 215 more rows]

## Sheet: S4
	Table S4. Primers used for qPCR validation
	Gene ID	Forward (5' to 3')	Reverse (5' to 3')
	MD17G1079700	AGACTCTGCTCGGTAGGGTT	TCTCTTTGCAGGAAGCGGAG
	MD08G1195400	TCCGCCAGACTCTCTACTCC	CAGCGAGAATTTTTCGGGGC
	MD05G1167600	ACAAGGGTCAATCAGTGAACA	TCCCTCCCGGATTCTATCAA
	MD12G1024600	GGTTATTTATGCAACAGGAGGCA	TCTCTCGCTCTCTCTGCTAA
	MD09G1006500	TTAAGCCATTAGGTGGGGCG	GCTCCCTCTCTGAGAACTCC
	MD11G1189000	TCGGGCGGATGAGGATCTAT	GGGCTTGAAGCTCGTTGTTG
	MD17G1009900	ATGATCTTGGCGATCGACGG	TGCCCTCTTCTTCAACGGTC
	MD09G1256000	TTGACGGCTTCAACTTGCCTA	GAGCCGGGCACGCCA

## Sheet: S5
	Table S5. qRT-PCR results compared against RNA-seq data
	Gene ID	RPKM_RNAseq				Cp_qPCR
		N_deficient_0x	N_control_1x	N_excessive_2x	N_excessive_4x	N_deficient_0x	N_control_1x	N_excessive_2x	N_excessive_4x
	MD17G1079700	11.24	25.4467	33.1867	38.6133	1.106	2.13	2.98	3.603
	MD08G1195400	108.51	215.8	203.033	198.197	5.924	13.75	13.01	13.85
	MD05G1167600	11.6633	26.08	32.8833	43.08	0.0286	0.1523	0.21	0.2886
	MD12G1024600	4.75667	21.9667	23.7333	26.7833	0.0377	0.1644	0.1872	0.2349
	MD09G1006500	631.107	66.4633	64.07	108.613	27.59	7.001	5.843	15.38
	MD11G1189000	26.58	38.9133	57.4333	190.73	1.341	3.19	6.152	19.82
	MD17G1009900	84.0067	39.7833	29.85	30.9833	10.65	4.137	2.963	5.367
	MD09G1256000	6.62	22.3967	32.4833	192.743	0.2979	1.3	2.643	13

## Sheet: S6
	Table S6. Five expression clusters of 2,212 DEG dataset (C1-C5)
	C1	C2	C3	C4	C5
	Up in N deficient	Down in N excessive	Positive N correlation	Down in N deficient	Up in N excessive
	MD01G1024600	MD02G1178300	MD05G1168200	MD17G1000900	MD09G1140300
	MD16G1128500	MD01G1122900	MD15G1216500	MD15G1264900	MD16G1100500
	MD02G1120100	MD10G1035600	MD12G1187100	MD14G1064600	MD14G1188400
	MD17G1261000	MD15G1394300	MD15G1098800	MD01G1093500	MD09G1022200
	MD13G1076200	MD11G1024000	MD05G1320800	MD12G1167300	MD06G1012300
	MD05G1065500	MD17G1240300	MD04G1064400	MD04G1184900	MD05G1074600
	MD02G1319100	MD00G1046700	MD15G1372400	MD17G1079500	MD02G1013800
	MD06G1043900	MD05G1180500	MD16G1196800	MD06G1187500	MD04G1020100
	MD06G1233500	MD10G1334300	MD09G1184000	MD07G1222300	MD15G1021500
	MD17G1175900	MD04G1126500	MD07G1077900	MD11G1160200	MD11G1298900
	MD16G1197800	MD08G1048900	MD01G1174400	MD15G1140500	MD15G1273300
	MD15G1222300	MD10G1035700	MD13G1230800	MD16G1175900	MD14G1044500
	MD10G1111000	MD15G1351800	MD05G1363600	MD16G1287800	MD17G1075600
	MD16G1040800	MD13G1049800	MD02G1026200	MD06G1180400	MD09G1035000
	MD14G1098500	MD13G1071900	MD15G1024100	MD17G1085000	MD03G1254900
	MD16G1047300	MD00G1183000	MD13G1161100	MD05G1352500	MD07G1027000
	MD17G1010400	MD07G1244600	MD07G1308000	MD11G1280100	MD07G1228500
	MD13G1069200	MD08G1248200	MD14G1041200	MD17G1270600	MD05G1118500
	MD09G1164500	MD05G1261100	MD15G1444700	MD16G1116100	MD16G1027400
	MD16G1019500	MD14G1184100	MD13G1189100	MD12G1168600	MD09G1049600
	MD01G1222600	MD06G1135400	MD17G1139500	MD09G1091000	MD15G1304000
	MD14G1207600	MD10G1223800	MD15G1084200	MD15G1070000	MD00G1041400
	MD08G1029500	MD07G1056200	MD09G1217300	MD07G1043300	MD08G1143400
	MD16G1217500	MD15G1260000	MD12G1037000	MD03G1020500	MD14G1120000
	MD08G1091700	MD02G1061100	MD11G1192000	MD12G1129500	MD15G1120000
	MD01G1228300	MD16G1240400	MD10G1065900	MD08G1221800	MD14G1014500
	MD10G1194100	MD05G1344300	MD11G1242900	MD15G1279800	MD02G1050100
	MD14G1090500	MD16G1118600	MD05G1143000	MD15G1205500	MD03G1129600
	MD11G1075900	MD06G1127200	MD13G1209700	MD15G1244200	MD05G1116600
	MD12G1262800	MD06G1203400	MD12G1125800	MD13G1049400	MD15G1236600
	MD05G1074200	MD17G1190000	MD17G1104000	MD12G1024600	MD12G1144800
	MD12G1132100	MD02G1168000	MD13G1285100	MD09G1247900	MD10G1126100
	MD07G1273000	MD16G1007000	MD15G1348900	MD10G1265300	MD13G1019900
	MD16G1043200	MD13G1087500	MD04G1147900	MD10G1133400	MD11G1009500
	MD05G1274700	MD08G1023700	MD10G1298700	MD17G1034000	MD11G1222300
	MD00G1186700	MD10G1186000	MD11G1210800	MD06G1205700	MD00G1009000
	MD01G1222500	MD05G1175600	MD03G1066000	MD17G1212000	MD03G1256000
	MD13G1146900	MD03G1203500	MD17G1106400	MD03G1252100	MD09G1221600
	MD13G1113100	MD00G1176400	MD08G1046600	MD10G1184500	MD12G1165400
	MD17G1268900	MD15G1403000	MD10G1120200	MD09G1032300	MD10G1315400
	MD16G1050300	MD04G1014800	MD02G1035800	MD08G1195400	MD16G1129900
	MD14G1227500	MD09G1275500	MD13G1076800	MD06G1228000	MD14G1176400
	MD12G1059100	MD03G1181400	MD16G1173500	MD08G1220400	MD02G1118000
	MD05G1113000	MD14G1015400	MD05G1169600	MD06G1195000	MD02G1013500
	MD08G1141800	MD16G1050500	MD17G1130400	MD15G1300000	MD16G1106000
	MD17G1163600	MD15G1280500	MD09G1143800	MD01G1050800	MD11G1239100
	MD16G1072500	MD13G1049600	MD13G1172100	MD12G1143400	MD17G1025400
	MD17G1287600	MD05G1034200	MD11G1079600	MD12G1241300	MD06G1054900
	MD07G1261900	MD10G1014200	MD09G1019900	MD17G1167200	MD13G1065600
	MD13G1045700	MD12G1066400	MD07G1216200	MD07G1278900	MD05G1139400
	MD00G1125300	MD05G1172700	MD01G1207200	MD14G1098400	MD16G1011800
	MD08G1185500	MD04G1187700	MD01G1120400	MD05G1351400	MD16G1000500
	MD03G1143100	MD12G1100900	MD06G1195100	MD11G1096000	MD11G1227900
	MD06G1072200	MD04G1175400	MD15G1095200	MD11G1228200	MD08G1005500
	MD01G1136700	MD17G1189100	MD14G1224900	MD13G1070900	MD13G1174500
	MD08G1063800	MD12G1233400	MD04G1173600	MD13G1274600	MD03G1183400
	MD02G1021100	MD16G1027000	MD03G1211200	MD09G1011300	MD17G1189400
	MD05G1312700	MD02G1145800	MD17G1143900	MD10G1167800	MD00G1115700
	MD13G1163300	MD16G1145300	MD13G1071600	MD14G1052700	MD16G1238400
	MD11G1282500	MD16G1270700	MD05G1054800	MD12G1174800	MD02G1062900
	MD09G1142500	MD03G1211900	MD13G1081900	MD09G1254500	MD02G1175800
	MD11G1316800	MD10G1334500	MD11G1237400	MD13G1021700	MD05G1094500
	MD00G1186900	MD15G1400400	MD14G1242700	MD08G1211700	MD16G1092700
	MD13G1009500	MD12G1012300	MD02G1207900	MD13G1111700	MD08G1133500
	MD12G1027700	MD14G1001600	MD08G1095300	MD02G1223300	MD16G1064400
	MD00G1102700	MD03G1146300	MD05G1028100	MD00G1037500	MD11G1229800
	MD10G1073500	MD07G1176400	MD03G1062400	MD16G1117600	MD01G1053100
	MD08G1168600	MD12G1036700	MD09G1036900	MD16G1043000	MD06G1089300
	MD13G1203400	MD13G1049500	MD04G1131700	MD13G1280800	MD10G1051800
	MD10G1271300	MD14G1233100	MD12G1089500	MD04G1055700	MD01G1171100
	MD13G1061900	MD15G1139800	MD15G1182500	MD09G1173600	MD09G1112200
	MD10G1252600	MD10G1195400	MD16G1053900	MD04G1150400	MD03G1215100
	MD05G1318900	MD08G1125400	MD08G1189500	MD09G1081000	MD01G1194700
	MD01G1123300	MD13G1041900	MD01G1063400	MD07G1266700	MD06G1128900
	MD05G1119500	MD05G1136800	MD16G1070600	MD15G1148200	MD09G1271100
	MD08G1121600	MD11G1022500	MD02G1175400	MD09G1270600	MD05G1063200
	MD04G1009700	MD13G1097000	MD11G1244800	MD02G1043100	MD13G1188500
	MD00G1169500	MD10G1071200	MD02G1292200	MD14G1186700	MD05G1358900
	MD01G1101700	MD06G1033100	MD04G1225400	MD08G1039700	MD06G1227300
	MD14G1240600	MD10G1309200	MD13G1042700	MD11G1229000	MD17G1203800
	MD13G1059300	MD17G1117000	MD04G1064200	MD04G1209500	MD12G1205900
	MD10G1299600	MD10G1056900	MD00G1116600	MD05G1230600	MD08G1062400
	MD05G1043200	MD07G1305300	MD11G1189000	MD13G1101400	MD15G1176000
	MD01G1041900	MD06G1148800	MD03G1198900	MD04G1110500	MD02G1291100
	MD02G1076100	MD14G1090900	MD04G1018400	MD10G1261300	MD06G1215300
	MD16G1083300	MD03G1001300	MD06G1103400	MD15G1395200	MD08G1168100
	MD02G1158600	MD04G1243800	MD09G1276300	MD14G1218200	MD17G1015000
	MD10G1308300	MD17G1238600	MD14G1239500	MD17G1030800	MD08G1207700
	MD12G1178500	MD13G1024300	MD07G1060000	MD12G1038700	MD09G1079600
	MD04G1112000	MD03G1147100	MD08G1186700	MD17G1017100	MD07G1080900
	MD15G1378200	MD02G1232200	MD05G1106800	MD03G1224100	MD11G1293900
	MD15G1374500	MD17G1281400	MD14G1177900	MD02G1179000	MD17G1209800
	MD01G1074700	MD08G1088700	MD12G1218200	MD14G1001800	MD12G1262900
	MD15G1402800	MD10G1273300	MD08G1218900	MD10G1064700	MD13G1177800
	MD03G1071800	MD10G1045100	MD15G1407600	MD05G1121200	MD15G1171400
	MD10G1161900	MD12G1042900	MD08G1028100	MD17G1010000	MD08G1023500
	MD15G1289800	MD03G1101800	MD02G1127400	MD11G1204700	MD13G1053400
	MD04G1213800	MD09G1173500	MD04G1011700	MD04G1154100	MD15G1020900
	MD00G1077400	MD04G1156000	MD03G1288700	MD07G1205700	MD12G1244800
	MD04G1079000	MD00G1024500	MD03G1021800	MD17G1005800	MD00G1123300
	MD15G1263800	MD01G1079200	MD14G1079900	MD06G1189500	MD11G1081300
	MD06G1128400	MD05G1257000	MD17G1212300	MD14G1113700	MD09G1287900
	MD10G1289200	MD11G1268400	MD01G1213300	MD03G1287700	MD12G1243500
	MD03G1205200	MD05G1000700	MD02G1069500	MD07G1173900	MD15G1226600
	MD15G1402700	MD07G1261100	MD08G1050600	MD04G1062900	MD04G1175500
	MD04G1203200	MD12G1041400	MD08G1050700	MD09G1076000	MD06G1226700
	MD16G1170900	MD17G1049600	MD12G1228800	MD12G1028200	MD17G1221800
	MD15G1402400	MD08G1112700	MD09G1061000	MD03G1085000	MD06G1046300
	MD16G1065700	MD12G1119900	MD03G1292200	MD06G1169600	MD10G1164500
	MD02G1151700	MD01G1153400	MD09G1126900	MD03G1042100	MD02G1155000
	MD10G1296800	MD12G1153900	MD02G1128300	MD15G1365900	MD11G1241700
	MD15G1133200	MD06G1009800	MD09G1162900	MD02G1060000	MD11G1062800
	MD04G1002500	MD06G1226800	MD13G1179600	MD15G1034300	MD00G1032400
	MD05G1305700	MD15G1023100	MD14G1228100	MD07G1287700	MD03G1046500
	MD04G1090500	MD10G1333200	MD05G1082200	MD13G1265000	MD15G1409200
	MD05G1295700	MD14G1002500	MD13G1070200	MD08G1045100	MD07G1298900
	MD00G1187000	MD07G1184000	MD15G1343900	MD09G1230900	MD08G1234400
	MD14G1033000	MD07G1292700	MD07G1198700	MD08G1178500	MD01G1085900
	MD08G1110500	MD00G1192900	MD05G1294300	MD08G1149900	MD08G1124100
	MD09G1219100	MD12G1001900	MD09G1098900	MD15G1153400	MD05G1256500
	MD08G1021600	MD13G1012600	MD12G1136700	MD16G1087900	MD13G1042200
	MD07G1002900	MD15G1266500	MD17G1286800	MD04G1102000	MD11G1042600
	MD10G1306800	MD08G1001300	MD13G1042500	MD17G1113000	MD03G1173700
	MD14G1004600	MD05G1226500	MD12G1099800	MD02G1222600	MD07G1264500
	MD09G1135900	MD11G1007900	MD08G1101700	MD15G1098700	MD17G1263400
	MD00G1131800	MD11G1109200	MD08G1080600	MD02G1195400	MD05G1000500
	MD09G1111200	MD16G1050600	MD15G1349000	MD15G1391500	MD15G1233400
	MD15G1271200	MD13G1041800	MD15G1215500	MD03G1023000	MD08G1205500
	MD04G1133600	MD03G1128900	MD12G1245900	MD15G1281000	MD14G1085300
	MD11G1123400	MD08G1086300	MD07G1270900	MD13G1117000	MD09G1120600
	MD15G1074800	MD16G1259000	MD02G1099800	MD16G1193000	MD14G1122900
	MD11G1047400	MD16G1253900	MD13G1087900	MD11G1182500	MD03G1091100
	MD04G1116200	MD11G1041800	MD01G1185500	MD03G1296200	MD02G1016700
	MD03G1290700	MD10G1165600	MD14G1223700	MD16G1059700	MD13G1092200
	MD13G1234500	MD04G1112600	MD11G1070800	MD07G1291700	MD05G1115700
	MD01G1230100	MD15G1102300	MD15G1015100	MD06G1083400	MD07G1008600
	MD07G1258400	MD10G1333300	MD17G1107200	MD09G1271200	MD12G1238600
	MD15G1325900	MD02G1141700	MD05G1103600	MD15G1282600	MD15G1328100
	MD01G1139700	MD07G1205300	MD17G1045300	MD14G1214200	MD13G1263800
	MD02G1085100	MD11G1235900	MD11G1294000	MD02G1303300	MD03G1037700
	MD17G1202000	MD05G1184800	MD17G1066700	MD12G1003600	MD15G1170900
	MD02G1157100	MD03G1068900	MD11G1123900	MD15G1106000	MD14G1153600
	MD03G1177200	MD16G1018000	MD06G1008700	MD11G1063100	MD11G1256600
	MD03G1222600	MD07G1295200	MD15G1372600	MD15G1126700	MD15G1091000
	MD16G1201200	MD10G1305000	MD17G1066000	MD04G1153900	MD02G1107600
	MD13G1061200	MD15G1180700	MD16G1018100	MD03G1134700	MD07G1204500
	MD11G1225400	MD08G1041400	MD12G1103600	MD01G1195000	MD08G1011600
	MD10G1321600	MD01G1198900	MD10G1274200	MD03G1070400	MD11G1289600
	MD05G1314100	MD08G1112900	MD06G1209100	MD00G1165200	MD00G1111500
	MD10G1166300	MD09G1170800	MD14G1223600	MD05G1319800	MD08G1041500
	MD11G1168500	MD15G1415100	MD15G1136400	MD12G1103300	MD11G1230800
	MD16G1076400	MD13G1212300	MD15G1390700	MD04G1185900	MD16G1076100
	MD11G1093800	MD01G1084700	MD06G1118700	MD02G1110500	MD02G1079200
	MD11G1163900	MD09G1016700	MD12G1194700	MD03G1267900	MD05G1312200
	MD01G1071800	MD14G1236300	MD03G1233100	MD10G1338100	MD13G1134700
	MD09G1177500	MD08G1026300	MD11G1103100	MD13G1218400	MD08G1039300
	MD08G1092600	MD15G1266600	MD14G1242900	MD14G1123400	MD07G1282200
	MD07G1115200	MD06G1134600	MD06G1104100	MD12G1163000	MD16G1230700
	MD05G1354000	MD17G1270300	MD06G1079300	MD12G1011500	MD11G1157100
	MD00G1140000	MD02G1275900	MD15G1059100	MD15G1248200	MD01G1192100
	MD15G1125000	MD00G1006800	MD07G1153200	MD10G1330900	MD03G1006500
	MD06G1088000	MD06G1216400	MD10G1077100	MD02G1068200	MD03G1292900
	MD05G1246500	MD13G1014100	MD09G1115100	MD03G1070900	MD17G1016400
	MD15G1343500	MD00G1007000	MD17G1030100	MD03G1090600	MD12G1119800
	MD09G1142300	MD16G1157000	MD04G1204500	MD17G1100800	MD05G1167600
	MD02G1031100	MD17G1128600	MD03G1134800	MD04G1066300	MD03G1014400
	MD09G1006500	MD15G1252900	MD15G1153000	MD12G1107400	MD17G1079700
	MD17G1272100	MD17G1156800	MD06G1105900	MD03G1235600	MD06G1011400
	MD15G1019700	MD16G1145600	MD05G1335600	MD12G1029500	MD11G1141200
	MD02G1099300	MD09G1075600	MD05G1337400	MD11G1021700	MD15G1377600
	MD02G1152000	MD10G1251400	MD04G1147700	MD03G1028800	MD11G1108500
	MD15G1068000	MD17G1066300	MD14G1070200	MD03G1051900	MD00G1015700
	MD07G1219700	MD02G1282000	MD17G1045600	MD07G1269200	MD00G1035800
	MD15G1415200	MD09G1250300	MD17G1099200	MD15G1323900	MD17G1082000
	MD07G1221600	MD07G1246200	MD01G1040300	MD15G1153300	MD16G1026000
	MD03G1044500	MD13G1014200	MD14G1080000	MD10G1242100	MD14G1086100
	MD07G1046300	MD00G1024400	MD01G1201900	MD01G1092100	MD00G1098300
	MD12G1210300	MD12G1062100	MD15G1359900	MD16G1269600	MD03G1004000
	MD09G1278600	MD14G1041300	MD03G1073600	MD15G1033600	MD10G1192900
	MD02G1306200	MD06G1128500	MD07G1034400	MD16G1004100	MD02G1153500
	MD00G1093400	MD04G1138500	MD00G1037100	MD14G1139300	MD00G1171600
	MD11G1012500	MD15G1168500	MD05G1099400	MD13G1034200	MD05G1345800
	MD16G1050800	MD12G1259500	MD15G1355100	MD06G1093000	MD04G1184600
	MD16G1026500	MD03G1277900	MD15G1081300	MD10G1029800	MD05G1284000
	MD13G1077000	MD12G1058400	MD01G1213100	MD11G1280200	MD15G1155800
	MD04G1148000	MD08G1027400	MD09G1116400	MD01G1064600	MD03G1294400
	MD02G1258100	MD17G1035400	MD11G1313400	MD14G1186300	MD10G1170600
	MD07G1271400	MD08G1022400	MD13G1089700	MD07G1206700	MD11G1039600
	MD08G1220500	MD08G1066400	MD04G1142600	MD03G1066200	MD14G1175000
	MD06G1044100	MD15G1360600	MD01G1073600	MD12G1174000	MD17G1181600
	MD13G1016100	MD00G1051500	MD02G1005600	MD08G1106600	MD03G1217900
	MD15G1172700	MD15G1438300	MD01G1162700	MD05G1251100	MD03G1227500
	MD12G1136300	MD15G1329500	MD10G1021700	MD07G1189500	MD05G1073200
	MD10G1294500	MD04G1072900	MD03G1230600	MD09G1014400	MD10G1017300
	MD10G1198500	MD00G1015500	MD11G1279600	MD14G1008800	MD08G1229100
	MD07G1053900	MD15G1120300	MD01G1161300	MD11G1102300	MD10G1311700
	MD13G1181900	MD02G1057200	MD08G1098100	MD15G1443500	MD15G1409700
	MD07G1230600	MD09G1257800	MD07G1003900	MD15G1351700	MD11G1108700
	MD01G1217700	MD10G1196300	MD02G1099000	MD12G1163600	MD04G1212100
	MD10G1307500	MD04G1243400	MD05G1320400	MD00G1189100	MD03G1161500
	MD08G1038300	MD00G1089600	MD01G1006600	MD17G1202200	MD02G1192600
	MD04G1090600	MD03G1110000	MD03G1171500	MD15G1032900	MD15G1303500
	MD04G1229200	MD06G1098100	MD09G1256300	MD14G1186800	MD03G1227300
	MD13G1058000	MD05G1039600	MD03G1144400	MD07G1162700	MD04G1197700
	MD10G1276400	MD10G1307900	MD09G1256000	MD02G1168100	MD07G1179100
	MD04G1218500	MD08G1140900	MD15G1101800	MD11G1199800	MD07G1184800
	MD02G1020400	MD10G1078100	MD03G1259100	MD01G1240200	MD02G1255400
	MD11G1146700	MD10G1072700	MD08G1011700	MD07G1221900	MD11G1191100
	MD04G1214600	MD13G1052700	MD09G1162800	MD00G1175200	MD10G1325900
	MD05G1174000	MD13G1169800	MD13G1042400	MD15G1010800	MD06G1122000
	MD09G1028900	MD09G1281400	MD11G1109100	MD16G1198300	MD15G1189600
	MD01G1231600	MD15G1033100	MD02G1175500	MD02G1045500	MD02G1317900
	MD14G1240300	MD07G1065000	MD11G1309800	MD03G1159600	MD02G1104100
	MD01G1214700	MD06G1233700	MD02G1201500	MD15G1095000	MD17G1139400
	MD14G1124500	MD07G1023800	MD12G1057800	MD09G1155100	MD12G1193600
	MD03G1199600	MD05G1107800	MD10G1050200	MD11G1068400	MD01G1116700
	MD15G1254600	MD17G1067900	MD05G1010400	MD11G1217100	MD01G1150100
	MD12G1139500	MD03G1121600	MD13G1231900	MD14G1009300	MD04G1172500
	MD12G1176400	MD02G1159300	MD04G1058200	MD09G1113400	MD08G1070100
	MD14G1194100	MD15G1245900	MD14G1005700	MD03G1010300	MD05G1360600
	MD09G1110300	MD15G1388600	MD13G1231400	MD07G1206200	MD00G1189000
	MD05G1196800	MD16G1001800	MD15G1353800	MD16G1091200	MD03G1013700
	MD13G1231100	MD10G1295000	MD17G1137300	MD11G1249400	MD10G1281800
	MD14G1182700	MD07G1246100	MD14G1162400	MD04G1027800	MD13G1092100
	MD03G1215000	MD14G1133400	MD15G1360000	MD03G1006600	MD06G1215800
	MD10G1280000	MD07G1153300	MD11G1207500	MD11G1074900	MD03G1173300
	MD00G1148200	MD15G1191800	MD04G1212300	MD12G1163800	MD06G1079100
	MD05G1306400	MD12G1231600	MD10G1330600	MD11G1009700	MD17G1210200
	MD04G1161900	MD10G1110000	MD05G1156100	MD04G1028900	MD12G1057600
	MD04G1077000	MD13G1024600	MD10G1029100	MD03G1296600	MD11G1109400
	MD08G1014400	MD01G1027200	MD07G1268700	MD01G1143600	MD07G1296400
	MD01G1200400	MD03G1026700	MD00G1165100	MD07G1241300	MD11G1191900
	MD15G1364700	MD13G1150700	MD00G1190500	MD17G1101100	MD11G1272300
	MD06G1141800	MD06G1119300	MD03G1165700	MD07G1220100	MD15G1012300
	MD07G1158100	MD11G1216500	MD02G1137500	MD06G1118000	MD09G1286700
	MD10G1301800	MD14G1066100	MD17G1201600	MD15G1193000	MD05G1163800
	MD07G1297100	MD11G1099200	MD03G1022000	MD09G1235700	MD05G1336200
	MD15G1298700	MD02G1284000	MD12G1113000	MD04G1240700	MD13G1060700
	MD04G1003400	MD03G1118500	MD16G1043700	MD11G1212200	MD14G1069200
	MD05G1246300	MD07G1286500	MD15G1104100	MD06G1038900	MD04G1099200
	MD10G1321800	MD10G1279800	MD09G1054700	MD05G1266000	MD17G1099800
	MD13G1200700	MD09G1119300	MD15G1294700	MD11G1173900	MD16G1090800
	MD13G1040100	MD10G1326500	MD01G1029100	MD05G1165400	MD08G1114100
	MD16G1057700	MD17G1154000	MD04G1204600	MD15G1285300	MD17G1110200
	MD17G1052000	MD15G1381800	MD07G1169900	MD10G1071000	MD08G1161200
	MD08G1242900	MD10G1075200	MD13G1202800	MD08G1203800	MD11G1014400
	MD00G1052900	MD12G1264200	MD14G1060500	MD04G1161300	MD10G1282200
	MD13G1008700	MD17G1222500	MD07G1187400	MD07G1236800	MD02G1008400
	MD15G1020000	MD16G1056200	MD17G1074300	MD06G1083300	MD00G1051100
	MD04G1063300	MD05G1072500	MD07G1298000	MD15G1390400	MD03G1287300
	MD05G1178100	MD17G1022000	MD15G1216400	MD11G1248200	MD06G1225900
	MD12G1116700	MD01G1146800	MD04G1172200	MD08G1211100	MD12G1011200
	MD12G1180900	MD17G1260800	MD09G1116500	MD15G1027000	MD09G1026900
	MD16G1222100	MD04G1046000	MD15G1404400	MD02G1149600	MD03G1053100
	MD11G1245400	MD08G1141400	MD03G1278400	MD02G1275400	MD11G1047500
	MD07G1271300	MD08G1107900	MD02G1004100	MD10G1310600	MD09G1050600
	MD06G1160600	MD00G1161300	MD07G1051800	MD15G1264200	MD12G1078300
	MD00G1038300	MD07G1299200	MD06G1134100	MD01G1093700	MD05G1283600
	MD16G1056400	MD15G1126600	MD15G1153500	MD05G1207800	MD10G1231600
	MD15G1433000	MD17G1061600	MD08G1038900	MD13G1080800	MD10G1054900
	MD03G1051000	MD05G1086300	MD14G1038200	MD02G1171100	MD10G1261900
	MD15G1065400	MD15G1082600	MD02G1300300	MD16G1024000	MD01G1177400
	MD08G1030400	MD12G1042100	MD15G1257500	MD13G1118500	MD03G1070100
	MD10G1302000		MD12G1223900	MD13G1093700	MD09G1253000
	MD12G1202400		MD16G1079400	MD11G1021300	MD10G1339800
	MD10G1138000		MD10G1266100	MD15G1035100	MD08G1007200
	MD01G1145500		MD07G1228300	MD07G1236500	MD14G1061500
	MD01G1118300		MD10G1123500	MD14G1008900	MD08G1196500
	MD15G1048900		MD14G1151700	MD06G1166400	MD08G1103200
	MD07G1295600		MD15G1348800	MD06G1098900	MD02G1095600
	MD01G1087300		MD04G1137400	MD13G1127300	MD17G1243900
	MD10G1042000		MD08G1031300	MD02G1243700	MD16G1118400
	MD05G1074000		MD15G1149900	MD14G1059400	MD17G1114400
	MD11G1286200		MD13G1029700	MD05G1061600	MD09G1121100
	MD13G1255400		MD16G1165000	MD05G1026000	MD04G1061200
	MD04G1187600		MD09G1291500	MD03G1265600	MD16G1150200
	MD15G1407700		MD11G1250400	MD06G1039000	MD05G1205800
	MD02G1069100		MD12G1233500	MD17G1275800	MD00G1015600
	MD08G1243000		MD17G1209200	MD00G1018400	MD06G1182400
	MD01G1080900		MD10G1055500	MD05G1236300	MD17G1262500
	MD05G1062900		MD04G1185100	MD15G1393900	MD11G1109300
	MD10G1088100		MD05G1171900	MD13G1010700	MD09G1233300
	MD05G1325700		MD12G1199000	MD10G1298100	MD02G1042200
	MD09G1267600		MD06G1131600	MD10G1074400	MD14G1221800
	MD08G1216400		MD06G1170200	MD06G1039100	MD15G1073900
	MD11G1246000		MD09G1255700	MD05G1320900	MD05G1327100
	MD11G1074400		MD11G1019200	MD04G1243200	MD17G1113400
	MD08G1181000		MD09G1054400	MD05G1065100	MD01G1161700
	MD10G1190400		MD03G1240600	MD13G1184800	MD15G1012500
	MD12G1072900		MD02G1105900	MD06G1225600	MD04G1129100
	MD15G1401300		MD04G1144500	MD13G1087200	MD00G1052000
	MD14G1020100		MD08G1015000	MD14G1185000	MD12G1080200
	MD08G1095900		MD05G1321500	MD08G1210400	MD12G1166300
	MD06G1209900		MD03G1231800		MD04G1231800
	MD04G1070300		MD14G1235200		MD01G1006400
	MD01G1145600		MD16G1236700		MD07G1094700
	MD07G1253900		MD17G1072300		MD17G1193600
	MD03G1143600		MD15G1044300		MD15G1214700
	MD07G1091500		MD12G1238900		MD04G1047400
	MD02G1150100		MD05G1167400		MD13G1220300
	MD05G1163900		MD15G1383700		MD15G1428700
	MD08G1087700		MD17G1250000		MD04G1126700
	MD08G1151300		MD08G1028600		MD01G1230300
	MD15G1057800		MD00G1015800		MD17G1046700
	MD13G1119000		MD08G1086800		MD09G1210700
	MD04G1111400		MD11G1251800		MD07G1257100
	MD08G1009200		MD08G1095100		MD05G1291900
	MD15G1189400		MD09G1220200		MD14G1010200
	MD16G1060400		MD07G1291000		MD03G1231600
	MD14G1153300		MD11G1028200		MD05G1309500
	MD07G1140300		MD06G1125700		MD17G1267000
	MD11G1284300		MD02G1080400		MD12G1055400
	MD10G1278300		MD03G1040100		MD15G1083400
	MD17G1019200		MD10G1152100		MD11G1108300
	MD09G1005800		MD07G1182500		MD03G1083100
	MD03G1166600		MD06G1160900		MD09G1039900
	MD12G1012100		MD14G1142700		MD03G1282700
	MD03G1095200		MD15G1206800		MD05G1254200
	MD06G1077700		MD02G1130700		MD17G1001000
	MD11G1316500		MD05G1069700		MD10G1312100
	MD01G1029200		MD14G1004000		MD00G1103100
	MD01G1077800		MD01G1177200		MD10G1320900
	MD17G1099600		MD16G1117500		MD03G1004300
	MD07G1309000		MD15G1287300		MD08G1010600
	MD16G1109500		MD16G1131300		MD01G1121300
	MD10G1299900		MD12G1147300		MD10G1110200
	MD16G1111500		MD15G1067100		MD04G1191200
	MD05G1122600		MD14G1238700		MD16G1136100
	MD05G1303500		MD07G1203100		MD10G1238800
	MD07G1306900		MD03G1238700		MD00G1004900
	MD09G1045700		MD03G1157200		MD01G1074400
	MD12G1244500		MD16G1265900		MD14G1202000
	MD10G1211100		MD03G1134300		MD07G1160900
	MD03G1188800		MD11G1020900		MD13G1000200
	MD05G1103100		MD17G1272400		MD00G1125900
	MD01G1087900		MD17G1058100		MD04G1164600
	MD01G1226600		MD01G1162100		MD01G1175600
	MD15G1401800		MD14G1070300		MD11G1126200
	MD06G1116800		MD04G1060700		MD06G1224500
	MD05G1246400		MD13G1033600		MD05G1298900
	MD02G1226200		MD15G1170100		MD11G1022800
	MD10G1198400		MD15G1147800		MD17G1020800
	MD12G1246300		MD02G1120300		MD01G1222200
	MD04G1197500		MD12G1063900		MD07G1107800
	MD03G1020200		MD16G1063300		MD05G1191000
	MD04G1195800		MD02G1025500		MD14G1117100
	MD13G1064900		MD04G1059200		MD05G1215200
	MD12G1229200		MD01G1188500		MD13G1180400
	MD10G1142200		MD07G1239000		MD09G1178400
	MD17G1009100		MD00G1061700		MD17G1229700
	MD02G1082200		MD05G1055300		MD15G1128700
	MD07G1201600		MD17G1066800		MD15G1251000
	MD07G1053100		MD03G1294300		MD02G1291200
	MD06G1051800		MD06G1049100		MD16G1090700
	MD14G1210700		MD06G1213300		MD15G1106300
	MD16G1061000		MD16G1207500		MD05G1340800
	MD15G1072600		MD17G1167100		MD15G1032500
	MD03G1222700		MD10G1083200		MD09G1233400
	MD10G1306600		MD01G1237600		MD00G1133300
	MD17G1224900		MD07G1284200		MD14G1126900
	MD01G1195200		MD08G1219200		MD05G1072400
	MD00G1072500		MD11G1133400		MD05G1311900
	MD03G1273300		MD03G1069500		MD07G1203700
	MD06G1036600		MD17G1095400		MD10G1261000
	MD10G1045400		MD13G1074300		MD02G1009400
	MD08G1004500		MD06G1229100		MD11G1143400
	MD16G1081800		MD04G1047700		MD12G1077000
	MD17G1009900		MD15G1253900		MD05G1105500
	MD14G1124200		MD17G1077800		MD10G1291400
	MD09G1211700		MD00G1033200		MD06G1010100
	MD08G1190800		MD15G1090700		MD15G1042800
	MD13G1028100		MD15G1269500		MD11G1246800
	MD00G1187100		MD07G1173600		MD03G1132200
	MD15G1443100		MD11G1054000		MD11G1079700
	MD09G1202600		MD13G1010600		MD15G1211500
	MD14G1203000		MD06G1077800		MD01G1051300
	MD15G1318800		MD06G1105500		MD01G1141300
	MD14G1193100		MD13G1086700		MD09G1252100
	MD00G1140300		MD10G1292500		MD05G1197900
	MD03G1242000		MD09G1117300		MD01G1050900
	MD15G1236100		MD17G1240700		MD12G1212000
	MD15G1075800		MD15G1084100		MD06G1031800
	MD11G1229700		MD11G1017400		MD15G1006300
	MD01G1208700		MD05G1028500		MD13G1173100
	MD00G1038700		MD02G1198700		MD01G1133700
	MD13G1111300		MD17G1239600		MD01G1099600
	MD15G1407300		MD10G1080000		MD13G1251000
	MD05G1242300		MD06G1100000		MD11G1036900
	MD02G1187800		MD15G1324500		MD12G1029300
	MD15G1372900		MD07G1135000		MD07G1064400
	MD11G1213500		MD12G1198900		MD01G1004300
	MD13G1213400		MD05G1109100		MD02G1018000
	MD15G1241400		MD15G1234400		MD06G1010300
	MD09G1195300		MD16G1108700		MD00G1161000
	MD02G1122200		MD03G1053200		MD02G1122400
	MD12G1175200		MD01G1124500		MD10G1089300
	MD11G1255300		MD12G1022200		MD13G1166800
	MD08G1029600		MD05G1360500		MD16G1132100
	MD06G1089500		MD04G1083900		MD15G1005800
	MD15G1172200		MD11G1256900		MD01G1108500
	MD12G1255400		MD16G1044000		MD15G1307200
	MD14G1172100		MD07G1164000		MD15G1230200
	MD11G1279800		MD01G1172700		MD08G1006000
	MD05G1033800		MD13G1079300		MD08G1107300
	MD10G1283900		MD09G1194900		MD02G1255300
	MD05G1059300		MD04G1129800		MD04G1129500
	MD13G1079500		MD07G1223100		MD04G1186600
	MD01G1168600		MD01G1086800		MD14G1077700
	MD15G1073200		MD17G1081000		MD06G1094100
	MD04G1187400		MD00G1014300		MD15G1215200
	MD17G1224600		MD11G1110500		MD14G1060200
	MD02G1054900		MD06G1054800		MD15G1348000
	MD03G1118100		MD16G1174800		MD02G1087100
	MD04G1003000		MD17G1078100		MD16G1069900
	MD10G1131700		MD07G1304200		MD11G1054100
	MD10G1179900		MD00G1166100		MD03G1088100
	MD14G1018700		MD02G1026300		MD11G1158500
	MD12G1198800		MD11G1200400		MD05G1304000
	MD02G1085700		MD17G1048300		MD12G1163700
	MD15G1070600		MD02G1312100		MD09G1183200
	MD01G1120300		MD02G1180400		MD08G1236800
	MD13G1114900		MD01G1140200		MD09G1032400
	MD01G1220400		MD11G1113800		MD03G1254000
	MD01G1204500		MD12G1191100		MD00G1122000
	MD07G1186300		MD01G1199000		MD01G1155000
	MD02G1226100		MD01G1140100		MD00G1089100
	MD14G1002700		MD05G1320600		MD00G1109700
	MD15G1270100		MD04G1069300		MD05G1011900
	MD11G1287900		MD09G1037400		MD16G1169000
	MD13G1222900		MD15G1146100		MD15G1426600
	MD17G1164200		MD06G1055000		MD03G1042800
	MD08G1126500		MD15G1373900		MD16G1118100
	MD09G1074300		MD16G1230600		MD11G1236900
	MD15G1401200		MD02G1166700		MD16G1057000
	MD13G1049200		MD02G1045800		MD07G1296000
	MD15G1233200		MD08G1217600		MD06G1164700
	MD13G1217400		MD13G1108500		MD11G1299000
	MD11G1054300		MD03G1059200		MD11G1090600
	MD08G1218800		MD17G1120700		MD17G1229300
	MD07G1250500		MD14G1208000		MD17G1001400
	MD12G1257000		MD14G1215700		MD08G1042700
	MD05G1359400		MD08G1061900		MD16G1084400
	MD05G1234400		MD15G1279200		MD13G1085200
	MD15G1312200		MD07G1240700		MD11G1003700
	MD03G1216700		MD07G1201300		MD05G1206700
	MD01G1020100		MD15G1060000		MD17G1153000
	MD06G1142200		MD08G1124700		MD15G1346400
	MD12G1038300		MD08G1037600		MD15G1062400
	MD16G1053400		MD13G1210400		MD07G1164200
	MD01G1019500		MD16G1064200		MD08G1220900
	MD14G1039100		MD17G1148400		MD13G1131200
	MD13G1200600		MD05G1220500		MD11G1166600
	MD10G1281100		MD02G1316800		MD06G1068000
	MD00G1221400		MD09G1033000		MD16G1000400
	MD09G1033600		MD08G1102600		MD12G1002500
	MD13G1101200		MD14G1037400		MD00G1191600
	MD01G1077900		MD09G1071400		MD13G1000400
	MD09G1270500		MD12G1190700		MD04G1194600
	MD05G1050100		MD02G1025600		MD17G1229500
	MD13G1181800		MD10G1300700		MD07G1163800
	MD12G1104300		MD16G1165100		MD16G1009000
	MD12G1034100		MD14G1147900		MD16G1007900
	MD17G1105700		MD06G1052700		MD05G1173700
	MD07G1237000		MD16G1029400		MD09G1099500
	MD12G1161400		MD15G1054300		MD14G1123200
	MD15G1071000		MD13G1122500		MD09G1123200
	MD16G1132300		MD03G1200900		MD14G1196200
	MD15G1262300		MD07G1189600		MD16G1075200
	MD06G1016500		MD13G1109600		MD08G1211500
	MD13G1023800				MD12G1120300
	MD02G1012700				MD15G1337000
	MD01G1060300				MD09G1292900
	MD00G1082300				MD10G1108800
	MD08G1031700				MD02G1048100
	MD02G1249500				MD12G1183000
	MD03G1297100				MD02G1131800
	MD11G1269800				MD15G1321300
	MD11G1138900				MD12G1054000
	MD09G1027900				MD15G1199200
	MD01G1068800				MD05G1115400
	MD01G1086500				MD11G1082600
	MD09G1009100				MD06G1094500
	MD02G1245100				MD04G1224400
	MD07G1266500				MD07G1146900
	MD01G1139800				MD09G1133900
	MD10G1281000				MD17G1263500
	MD12G1103500
	MD16G1236400
	MD16G1079100
	MD13G1028300
	MD13G1130700
	MD07G1075600
	MD15G1039300
	MD13G1144600
	MD15G1385500
	MD08G1106900
	MD16G1090000
	MD15G1410400
	MD00G1132400
	MD02G1190300
	MD10G1258700
	MD02G1150500
	MD12G1002300
	MD04G1181300
	MD04G1208200
	MD08G1134000
	MD17G1103800
	MD12G1125600
	MD13G1136900
	MD08G1190600
	MD02G1005800
	MD02G1129900
	MD15G1395700
	MD16G1121100
	MD07G1205500
	MD09G1039100
	MD04G1096200
	MD03G1026600
	MD09G1186000
	MD16G1108100
	MD11G1090800
	MD13G1201500
	MD12G1121200
	MD06G1235500
	MD13G1107500
	MD03G1098100
	MD10G1058300
	MD07G1221400
	MD15G1260700
	MD08G1015500
	MD07G1182200
	MD03G1005500
	MD16G1020100
	MD04G1118500
	MD01G1118100
	MD16G1035000
	MD15G1146700
	MD14G1125900
	MD12G1145700
	MD06G1124600
	MD16G1069500
	MD17G1230800
	MD14G1001000
	MD13G1205200
	MD15G1133100
	MD07G1025100
	MD09G1126700
	MD06G1222800
	MD11G1221100
	MD15G1066300
	MD06G1158800
	MD03G1048900
	MD06G1075800
	MD12G1137900
	MD15G1438500
	MD07G1214400
	MD17G1030600
	MD06G1012500
	MD15G1163200
	MD02G1266900
	MD06G1082500
	MD14G1148600
	MD02G1018300
	MD03G1128800
	MD08G1118000
	MD07G1248400
	MD12G1104800
	MD11G1172700
	MD11G1019400
	MD04G1100400
	MD11G1293500
	MD03G1020000
	MD14G1128200
	MD07G1282000
	MD13G1056800
	MD01G1141400
	MD10G1114300
	MD03G1230900
	MD15G1290300
	MD06G1172800
	MD14G1150000
	MD02G1022300
	MD05G1331000
	MD01G1234100
	MD15G1139200
	MD09G1141200
	MD16G1254900
	MD05G1324100
	MD11G1149900
	MD05G1084400
	MD11G1098100
	MD05G1190600
	MD07G1265200
	MD16G1037000
	MD11G1154200
	MD10G1158100
	MD17G1086200
	MD05G1219400
	MD12G1000800
	MD05G1123700
	MD11G1081100
	MD03G1292300
	MD09G1146700
	MD16G1201400
	MD13G1147700
	MD15G1030100
	MD09G1141700
	MD04G1019400
	MD02G1267000
	MD12G1208500
	MD13G1050400
	MD03G1082700
	MD11G1061800
	MD05G1235000
	MD14G1168400
	MD17G1070700
	MD10G1324500
	MD17G1180800
	MD12G1178600
	MD17G1034400
	MD11G1060600
	MD13G1181700
	MD14G1011900
	MD09G1031100
	MD06G1029400
	MD00G1038400
	MD04G1128800
	MD15G1433500
	MD13G1096700
	MD16G1131100
	MD14G1066000
	MD05G1329600
	MD05G1207000
	MD02G1039800
	MD10G1332400
	MD00G1149300
	MD01G1118000
	MD03G1058400
	MD11G1299600
	MD08G1161700
	MD03G1138500
	MD09G1032700
	MD17G1046600
	MD03G1029900
	MD01G1163900
	MD16G1082900
	MD17G1099500
	MD03G1019900
	MD15G1271800
	MD04G1122800
	MD00G1204600
	MD08G1172400
	MD11G1252200
	MD04G1214500
	MD06G1223800
	MD06G1233400
	MD17G1017000
	MD13G1116100
	MD08G1032900
	MD17G1011500
	MD03G1213800
	MD09G1029300
	MD03G1105400
	MD00G1012200
	MD02G1113800
	MD00G1069800
	MD07G1268200
	MD05G1363200
	MD11G1304000
	MD03G1281500
	MD08G1033000
	MD05G1306600
	MD14G1179400
	MD11G1109700
	MD11G1143500
	MD06G1173800
	MD07G1018400
	MD05G1006800
	MD14G1102600
	MD05G1176100
	MD09G1035100
	MD12G1178800
	MD03G1117900
	MD09G1032900
	MD05G1335100
	MD04G1134100
	MD06G1041000
	MD13G1173500
	MD13G1025200
	MD11G1225300
	MD14G1019500
	MD15G1067900
	MD15G1411200
	MD07G1303600
	MD09G1270200
	MD14G1226200
	MD02G1152200
	MD17G1027400
	MD02G1298200
	MD03G1246400
	MD01G1236300

## Sheet: S7
	Table S7. GO enrichment analysis of five expression clusters (C1-C5)
	C1
	GO_acc	term_type	Term	queryitem	querytotal	bgitem	bgtotal	pvalue	FDR	entries
	GO:0016036	P	cellular response to phosphate starvation	35	677	260	39869	1.5e-19	8.4e-16	// MD05G1059300 // MD10G1281000 // MD10G1324500 // MD17G1052000 // MD16G1040800 // MD11G1213500 // MD13G1113100 // MD11G1163900 // MD15G1172700 // MD14G1004600 // MD04G1197500 // MD17G1230800 // MD16G1222100 // MD02G1031100 // MD14G1227500 // MD07G1075600 // MD03G1143100 // MD04G1148000 // MD14G1039100 // MD14G1240300 // MD09G1111200 // MD10G1294500 // MD15G1020000 // MD06G1233500 // MD12G1210300…
	GO:0009267	P	cellular response to starvation	45	677	582	39869	3.7e-16	5.1e-13	// MD05G1059300 // MD10G1281000 // MD10G1324500 // MD14G1179400 // MD17G1052000 // MD05G1314100 // MD16G1040800 // MD11G1213500 // MD13G1113100 // MD11G1163900 // MD05G1178100 // MD10G1166300 // MD14G1004600 // MD06G1029400 // MD04G1197500 // MD17G1230800 // MD16G1222100 // MD01G1087300 // MD14G1227500 // MD07G1075600 // MD03G1143100 // MD04G1148000 // MD05G1242300 // MD02G1031100 // MD05G1190600…
	GO:0031668	P	cellular response to extracellular stimulus	48	677	661	39869	3.6e-16	5.1e-13	// MD11G1229700 // MD05G1059300 // MD10G1281000 // MD10G1324500 // MD14G1179400 // MD09G1219100 // MD17G1052000 // MD05G1314100 // MD16G1040800 // MD11G1213500 // MD13G1113100 // MD11G1163900 // MD05G1178100 // MD03G1215000 // MD14G1004600 // MD06G1029400 // MD04G1197500 // MD15G1172700 // MD17G1230800 // MD16G1222100 // MD01G1087300 // MD14G1227500 // MD07G1075600 // MD03G1143100 // MD04G1148000…
	GO:0031669	P	cellular response to nutrient levels	46	677	596	39869	1.8e-16	5.1e-13	// MD05G1059300 // MD10G1281000 // MD10G1324500 // MD14G1179400 // MD09G1219100 // MD17G1052000 // MD05G1314100 // MD16G1040800 // MD11G1213500 // MD13G1113100 // MD11G1163900 // MD05G1178100 // MD10G1166300 // MD14G1004600 // MD06G1029400 // MD04G1197500 // MD17G1230800 // MD16G1222100 // MD01G1087300 // MD14G1227500 // MD07G1075600 // MD03G1143100 // MD04G1148000 // MD05G1242300 // MD02G1031100…
	GO:0071496	P	cellular response to external stimulus	48	677	665	39869	4.5e-16	5.1e-13	// MD11G1229700 // MD05G1059300 // MD10G1281000 // MD10G1324500 // MD14G1179400 // MD09G1219100 // MD17G1052000 // MD05G1314100 // MD16G1040800 // MD11G1213500 // MD13G1113100 // MD11G1163900 // MD05G1178100 // MD03G1215000 // MD14G1004600 // MD06G1029400 // MD04G1197500 // MD15G1172700 // MD17G1230800 // MD16G1222100 // MD01G1087300 // MD14G1227500 // MD07G1075600 // MD03G1143100 // MD04G1148000…
	GO:0042594	P	response to starvation	45	677	599	39869	9.9e-16	8.3e-13	// MD05G1059300 // MD10G1281000 // MD10G1324500 // MD14G1179400 // MD17G1052000 // MD05G1314100 // MD16G1040800 // MD11G1213500 // MD13G1113100 // MD11G1163900 // MD05G1178100 // MD10G1166300 // MD14G1004600 // MD06G1029400 // MD04G1197500 // MD17G1230800 // MD16G1222100 // MD01G1087300 // MD14G1227500 // MD07G1075600 // MD03G1143100 // MD04G1148000 // MD05G1242300 // MD02G1031100 // MD05G1190600…
	GO:0031667	P	response to nutrient levels	46	677	626	39869	1e-15	8.3e-13	// MD05G1059300 // MD10G1281000 // MD10G1324500 // MD14G1179400 // MD09G1219100 // MD17G1052000 // MD05G1314100 // MD16G1040800 // MD11G1213500 // MD13G1113100 // MD11G1163900 // MD05G1178100 // MD10G1166300 // MD14G1004600 // MD06G1029400 // MD04G1197500 // MD17G1230800 // MD16G1222100 // MD01G1087300 // MD14G1227500 // MD07G1075600 // MD03G1143100 // MD04G1148000 // MD05G1242300 // MD02G1031100…
	GO:0009991	P	response to extracellular stimulus	48	677	693	39869	2e-15	1.4e-12	// MD11G1229700 // MD05G1059300 // MD10G1281000 // MD10G1324500 // MD14G1179400 // MD09G1219100 // MD17G1052000 // MD05G1314100 // MD16G1040800 // MD11G1213500 // MD13G1113100 // MD11G1163900 // MD05G1178100 // MD03G1215000 // MD14G1004600 // MD06G1029400 // MD04G1197500 // MD15G1172700 // MD17G1230800 // MD16G1222100 // MD01G1087300 // MD14G1227500 // MD07G1075600 // MD03G1143100 // MD04G1148000…
	GO:0009718	P	anthocyanin-containing compound biosynthetic process	19	677	149	39869	7.1e-11	3.9e-08	// MD05G1235000 // MD17G1272100 // MD01G1118300 // MD17G1261000 // MD08G1121600 // MD09G1278600 // MD07G1306900 // MD14G1210700 // MD07G1186300 // MD04G1003000 // MD01G1118100 // MD07G1309000 // MD01G1236300 // MD01G1118000 // MD08G1168600 // MD11G1269800 // MD13G1200600 // MD15G1410400 // MD04G1003400
	GO:0019374	P	galactolipid metabolic process	21	677	189	39869	7.5e-11	3.9e-08	// MD06G1233500 // MD11G1163900 // MD12G1210300 // MD03G1143100 // MD04G1148000 // MD02G1031100 // MD07G1115200 // MD15G1172700 // MD17G1175900 // MD16G1050800 // MD14G1039100 // MD14G1004600 // MD15G1163200 // MD04G1197500 // MD09G1195300 // MD10G1281000 // MD12G1161400 // MD10G1258700 // MD13G1113100 // MD14G1240300 // MD02G1020400
	GO:0019375	P	galactolipid biosynthetic process	21	677	189	39869	7.5e-11	3.9e-08	// MD06G1233500 // MD11G1163900 // MD12G1210300 // MD03G1143100 // MD04G1148000 // MD02G1031100 // MD07G1115200 // MD15G1172700 // MD17G1175900 // MD16G1050800 // MD14G1039100 // MD14G1004600 // MD15G1163200 // MD04G1197500 // MD09G1195300 // MD10G1281000 // MD12G1161400 // MD10G1258700 // MD13G1113100 // MD14G1240300 // MD02G1020400
	GO:0080167	P	response to karrikin	25	677	296	39869	2.7e-10	1.3e-07	// MD03G1281500 // MD13G1200600 // MD15G1289800 // MD00G1221400 // MD00G1072500 // MD15G1290300 // MD06G1036600 // MD05G1359400 // MD16G1083300 // MD08G1121600 // MD07G1306900 // MD06G1077700 // MD02G1267000 // MD01G1118100 // MD07G1186300 // MD01G1118300 // MD12G1116700 // MD01G1118000 // MD03G1051000 // MD08G1168600 // MD02G1266900 // MD17G1017000 // MD11G1093800 // MD14G1193100 // MD04G1096200
	GO:0009813	P	flavonoid biosynthetic process	34	677	555	39869	5.6e-10	2.4e-07	// MD10G1283900 // MD04G1003400 // MD01G1118000 // MD07G1309000 // MD11G1316800 // MD13G1200600 // MD00G1221400 // MD17G1272100 // MD00G1072500 // MD03G1297100 // MD15G1410400 // MD06G1036600 // MD01G1236300 // MD00G1169500 // MD08G1121600 // MD09G1278600 // MD07G1306900 // MD06G1077700 // MD04G1003000 // MD01G1118100 // MD07G1186300 // MD01G1118300 // MD12G1116700 // MD05G1235000 // MD11G1269800…
	GO:0044710	P	single-organism metabolic process	266	677	11338	39869	1.1e-09	4.7e-07	// MD08G1015500 // MD15G1263800 // MD10G1283900 // MD08G1126500 // MD03G1005500 // MD09G1039100 // MD10G1194100 // MD16G1236400 // MD01G1020100 // MD09G1202600 // MD13G1147700 // MD06G1051800 // MD03G1292300 // MD01G1168600 // MD15G1433500 // MD01G1060300 // MD11G1269800 // MD00G1069800 // MD09G1027900 // MD17G1272100 // MD04G1111400 // MD01G1118300 // MD00G1131800 // MD03G1019900 // MD03G1242000…
	GO:0010224	P	response to UV-B	23	677	272	39869	1.4e-09	5.1e-07	// MD04G1003400 // MD01G1118000 // MD07G1309000 // MD13G1200600 // MD17G1272100 // MD00G1072500 // MD03G1297100 // MD06G1036600 // MD01G1236300 // MD08G1121600 // MD07G1306900 // MD06G1077700 // MD04G1003000 // MD01G1118100 // MD07G1186300 // MD01G1118300 // MD12G1116700 // MD05G1235000 // MD15G1410400 // MD08G1168600 // MD12G1104300 // MD04G1096200 // MD14G1210700
	GO:0009247	P	glycolipid biosynthetic process	21	677	226	39869	1.5e-09	5.3e-07	// MD06G1233500 // MD11G1163900 // MD12G1210300 // MD03G1143100 // MD04G1148000 // MD02G1031100 // MD07G1115200 // MD15G1172700 // MD17G1175900 // MD16G1050800 // MD14G1039100 // MD14G1004600 // MD15G1163200 // MD04G1197500 // MD09G1195300 // MD10G1281000 // MD12G1161400 // MD10G1258700 // MD13G1113100 // MD14G1240300 // MD02G1020400
	GO:0050896	P	response to stimulus	312	677	13924	39869	2e-09	6.4e-07	// MD08G1015500 // MD15G1298700 // MD10G1283900 // MD15G1343500 // MD09G1039100 // MD08G1110500 // MD09G1033600 // MD15G1073200 // MD17G1052000 // MD13G1147700 // MD06G1051800 // MD03G1292300 // MD15G1039300 // MD15G1233200 // MD11G1269800 // MD00G1069800 // MD15G1071000 // MD09G1027900 // MD17G1272100 // MD04G1111400 // MD01G1118300 // MD06G1128400 // MD00G1187100 // MD03G1019900 // MD15G1402700…
	GO:1901700	P	response to oxygen-containing compound	137	677	4834	39869	2e-09	6.4e-07	// MD08G1015500 // MD15G1298700 // MD13G1147700 // MD06G1051800 // MD05G1196800 // MD00G1069800 // MD09G1027900 // MD17G1272100 // MD01G1118300 // MD03G1019900 // MD16G1047300 // MD06G1036600 // MD09G1035100 // MD00G1038400 // MD15G1125000 // MD01G1087300 // MD03G1117900 // MD17G1105700 // MD13G1234500 // MD14G1240300 // MD02G1267000 // MD09G1111200 // MD03G1020000 // MD12G1116700 // MD01G1118000…
	GO:0015698	P	inorganic anion transport	29	677	449	39869	3.4e-09	1e-06	// MD17G1011500 // MD11G1229700 // MD09G1028900 // MD01G1214700 // MD17G1030600 // MD09G1219100 // MD17G1052000 // MD03G1215000 // MD16G1047300 // MD06G1029400 // MD10G1111000 // MD09G1035100 // MD16G1222100 // MD02G1031100 // MD07G1075600 // MD08G1190800 // MD10G1294500 // MD14G1179400 // MD03G1242000 // MD13G1079500 // MD13G1045700 // MD07G1115200 // MD13G1213400 // MD15G1172700 // MD15G1146700…
	GO:0055114	P	oxidation-reduction process	93	677	2878	39869	3.8e-09	1.1e-06	// MD15G1263800 // MD08G1126500 // MD03G1005500 // MD09G1039100 // MD16G1236400 // MD03G1292300 // MD01G1060300 // MD00G1069800 // MD00G1221400 // MD14G1018700 // MD05G1234400 // MD00G1038400 // MD08G1243000 // MD10G1194100 // MD13G1009500 // MD12G1175200 // MD17G1070700 // MD09G1202600 // MD00G1148200 // MD03G1242000 // MD10G1190400 // MD00G1169500 // MD05G1207000 // MD03G1051000 // MD09G1110300…
	GO:0009812	P	flavonoid metabolic process	34	677	612	39869	5.8e-09	1.6e-06	// MD10G1283900 // MD04G1003400 // MD01G1118000 // MD07G1309000 // MD11G1316800 // MD13G1200600 // MD00G1221400 // MD17G1272100 // MD00G1072500 // MD03G1297100 // MD15G1410400 // MD06G1036600 // MD01G1236300 // MD00G1169500 // MD08G1121600 // MD09G1278600 // MD07G1306900 // MD06G1077700 // MD04G1003000 // MD01G1118100 // MD07G1186300 // MD01G1118300 // MD12G1116700 // MD05G1235000 // MD11G1269800…
	GO:0046283	P	anthocyanin-containing compound metabolic process	19	677	200	39869	6.4e-09	1.7e-06	// MD05G1235000 // MD17G1272100 // MD01G1118300 // MD17G1261000 // MD08G1121600 // MD09G1278600 // MD07G1306900 // MD14G1210700 // MD07G1186300 // MD04G1003000 // MD01G1118100 // MD07G1309000 // MD01G1236300 // MD01G1118000 // MD08G1168600 // MD11G1269800 // MD13G1200600 // MD15G1410400 // MD04G1003400
	GO:0009605	P	response to external stimulus	131	677	4662	39869	8.4e-09	2e-06	// MD10G1283900 // MD17G1052000 // MD03G1216700 // MD06G1222800 // MD12G1034100 // MD03G1019900 // MD14G1004600 // MD05G1246500 // MD05G1123700 // MD10G1296800 // MD00G1038400 // MD01G1087300 // MD05G1314100 // MD04G1148000 // MD16G1061000 // MD14G1039100 // MD02G1267000 // MD09G1111200 // MD03G1020000 // MD07G1271400 // MD01G1168600 // MD11G1269800 // MD03G1242000 // MD06G1089500 // MD17G1070700…
	GO:0006817	P	phosphate ion transport	11	677	53	39869	8.6e-09	2e-06	// MD07G1075600 // MD07G1115200 // MD15G1172700 // MD13G1213400 // MD01G1214700 // MD17G1052000 // MD10G1294500 // MD16G1050800 // MD16G1222100 // MD02G1031100 // MD05G1312700
	GO:0006664	P	glycolipid metabolic process	21	677	254	39869	1e-08	2.2e-06	// MD06G1233500 // MD11G1163900 // MD12G1210300 // MD03G1143100 // MD04G1148000 // MD02G1031100 // MD07G1115200 // MD15G1172700 // MD17G1175900 // MD16G1050800 // MD14G1039100 // MD14G1004600 // MD15G1163200 // MD04G1197500 // MD09G1195300 // MD10G1281000 // MD12G1161400 // MD10G1258700 // MD13G1113100 // MD14G1240300 // MD02G1020400
	GO:0006820	P	anion transport	48	677	1106	39869	9.8e-09	2.2e-06	// MD17G1011500 // MD11G1229700 // MD15G1343500 // MD09G1028900 // MD01G1214700 // MD16G1079100 // MD17G1030600 // MD09G1219100 // MD17G1052000 // MD14G1194100 // MD04G1187600 // MD00G1140000 // MD07G1046300 // MD15G1072600 // MD03G1215000 // MD03G1242000 // MD06G1029400 // MD15G1172700 // MD03G1138500 // MD09G1035100 // MD16G1222100 // MD02G1031100 // MD12G1000800 // MD10G1111000 // MD07G1075600…
	GO:1903509	P	liposaccharide metabolic process	21	677	261	39869	1.6e-08	3.3e-06	// MD06G1233500 // MD11G1163900 // MD12G1210300 // MD03G1143100 // MD04G1148000 // MD02G1031100 // MD07G1115200 // MD15G1172700 // MD17G1175900 // MD16G1050800 // MD14G1039100 // MD14G1004600 // MD15G1163200 // MD04G1197500 // MD09G1195300 // MD10G1281000 // MD12G1161400 // MD10G1258700 // MD13G1113100 // MD14G1240300 // MD02G1020400
	GO:0009611	P	response to wounding	39	677	835	39869	4e-08	8.1e-06	// MD10G1283900 // MD14G1019500 // MD04G1003400 // MD10G1306600 // MD15G1401800 // MD15G1073200 // MD13G1107500 // MD09G1141700 // MD00G1077400 // MD15G1402800 // MD00G1221400 // MD01G1074700 // MD03G1222700 // MD15G1401300 // MD15G1401200 // MD00G1038400 // MD01G1087300 // MD12G1034100 // MD15G1402400 // MD08G1161700 // MD04G1003000 // MD12G1116700 // MD11G1299600 // MD15G1402700 // MD10G1190400…
	GO:0042221	P	response to chemical	187	677	7610	39869	5.9e-08	1.1e-05	// MD08G1015500 // MD15G1298700 // MD13G1147700 // MD06G1051800 // MD05G1196800 // MD00G1069800 // MD09G1027900 // MD17G1272100 // MD04G1111400 // MD01G1118300 // MD03G1019900 // MD16G1047300 // MD03G1230900 // MD02G1069100 // MD06G1036600 // MD05G1123700 // MD09G1035100 // MD00G1038400 // MD15G1125000 // MD01G1087300 // MD15G1133100 // MD03G1117900 // MD03G1177200 // MD17G1105700 // MD13G1234500…
	GO:0046467	P	membrane lipid biosynthetic process	22	677	312	39869	6.4e-08	1.2e-05	// MD10G1281000 // MD13G1113100 // MD11G1163900 // MD15G1172700 // MD10G1258700 // MD14G1004600 // MD04G1197500 // MD10G1058300 // MD02G1031100 // MD03G1143100 // MD04G1148000 // MD14G1039100 // MD14G1240300 // MD06G1233500 // MD12G1210300 // MD07G1115200 // MD17G1175900 // MD02G1020400 // MD15G1163200 // MD16G1050800 // MD12G1161400 // MD09G1195300
	GO:0033554	P	cellular response to stress	90	677	2957	39869	1e-07	1.8e-05	// MD10G1283900 // MD15G1343500 // MD17G1052000 // MD17G1175900 // MD00G1069800 // MD03G1019900 // MD14G1004600 // MD03G1138500 // MD00G1038400 // MD01G1087300 // MD05G1314100 // MD04G1148000 // MD14G1039100 // MD09G1111200 // MD03G1020000 // MD01G1168600 // MD11G1269800 // MD03G1242000 // MD06G1089500 // MD17G1070700 // MD05G1329600 // MD05G1006800 // MD03G1273300 // MD06G1082500 // MD17G1224900…
	GO:0009744	P	response to sucrose	26	677	439	39869	1.1e-07	2e-05	// MD15G1298700 // MD04G1003400 // MD01G1118000 // MD07G1309000 // MD13G1107500 // MD13G1200600 // MD02G1187800 // MD17G1272100 // MD00G1072500 // MD03G1297100 // MD06G1036600 // MD01G1236300 // MD17G1230800 // MD08G1121600 // MD00G1149300 // MD07G1306900 // MD06G1077700 // MD04G1003000 // MD01G1118100 // MD07G1186300 // MD01G1118300 // MD05G1235000 // MD15G1410400 // MD04G1134100 // MD08G1168600…
	GO:0034285	P	response to disaccharide	26	677	443	39869	1.3e-07	2.3e-05	// MD15G1298700 // MD04G1003400 // MD01G1118000 // MD07G1309000 // MD13G1107500 // MD13G1200600 // MD02G1187800 // MD17G1272100 // MD00G1072500 // MD03G1297100 // MD06G1036600 // MD01G1236300 // MD17G1230800 // MD08G1121600 // MD00G1149300 // MD07G1306900 // MD06G1077700 // MD04G1003000 // MD01G1118100 // MD07G1186300 // MD01G1118300 // MD05G1235000 // MD15G1410400 // MD04G1134100 // MD08G1168600…
	GO:0042440	P	pigment metabolic process	36	677	826	39869	6.4e-07	0.0001	// MD04G1003400 // MD05G1235000 // MD07G1309000 // MD00G1187100 // MD11G1316800 // MD13G1200600 // MD17G1272100 // MD01G1118300 // MD00G1131800 // MD15G1410400 // MD02G1120100 // MD09G1033600 // MD01G1236300 // MD09G1035100 // MD06G1160600 // MD07G1025100 // MD09G1177500 // MD00G1186900 // MD04G1148000 // MD08G1121600 // MD14G1066000 // MD09G1278600 // MD07G1306900 // MD14G1039100 // MD04G1003000…
	GO:0006950	P	response to stress	206	677	8873	39869	6.4e-07	0.0001	// MD10G1283900 // MD15G1343500 // MD09G1039100 // MD09G1033600 // MD15G1073200 // MD17G1052000 // MD13G1147700 // MD06G1051800 // MD03G1292300 // MD11G1269800 // MD00G1069800 // MD09G1027900 // MD14G1018700 // MD03G1019900 // MD15G1402700 // MD12G1121200 // MD14G1004600 // MD05G1246500 // MD05G1123700 // MD09G1035100 // MD00G1038400 // MD15G1125000 // MD01G1087300 // MD15G1072600 // MD03G1117900…
	GO:0055062	P	phosphate ion homeostasis	7	677	25	39869	8.2e-07	0.00013	// MD06G1233500 // MD07G1253900 // MD14G1240300 // MD09G1006500 // MD10G1294500 // MD17G1010400 // MD05G1312700
	GO:0072506	P	trivalent inorganic anion homeostasis	7	677	25	39869	8.2e-07	0.00013	// MD06G1233500 // MD07G1253900 // MD14G1240300 // MD09G1006500 // MD10G1294500 // MD17G1010400 // MD05G1312700
	GO:0006643	P	membrane lipid metabolic process	22	677	376	39869	1.3e-06	0.00019	// MD10G1281000 // MD13G1113100 // MD11G1163900 // MD15G1172700 // MD10G1258700 // MD14G1004600 // MD04G1197500 // MD10G1058300 // MD02G1031100 // MD03G1143100 // MD04G1148000 // MD14G1039100 // MD14G1240300 // MD06G1233500 // MD12G1210300 // MD07G1115200 // MD17G1175900 // MD02G1020400 // MD15G1163200 // MD16G1050800 // MD12G1161400 // MD09G1195300
	GO:0044550	P	secondary metabolite biosynthetic process	32	677	721	39869	1.9e-06	0.00027	// MD17G1011500 // MD10G1283900 // MD16G1201400 // MD13G1201500 // MD04G1003400 // MD01G1168600 // MD08G1009200 // MD00G1221400 // MD04G1111400 // MD00G1072500 // MD06G1036600 // MD00G1038400 // MD05G1359400 // MD04G1112000 // MD04G1148000 // MD04G1003000 // MD13G1222900 // MD12G1116700 // MD13G1111300 // MD11G1299600 // MD08G1242900 // MD08G1243000 // MD03G1051000 // MD16G1222100 // MD04G1096200…
	GO:0009411	P	response to UV	27	677	553	39869	2.3e-06	0.00032	// MD04G1003400 // MD09G1009100 // MD01G1118000 // MD07G1309000 // MD15G1019700 // MD13G1059300 // MD13G1200600 // MD17G1272100 // MD00G1072500 // MD03G1297100 // MD06G1036600 // MD01G1236300 // MD08G1121600 // MD07G1306900 // MD06G1077700 // MD04G1003000 // MD01G1118100 // MD07G1186300 // MD01G1118300 // MD12G1116700 // MD05G1235000 // MD15G1410400 // MD08G1168600 // MD12G1104300 // MD04G1096200…
	GO:0055081	P	anion homeostasis	7	677	33	39869	4.1e-06	0.00056	// MD06G1233500 // MD07G1253900 // MD14G1240300 // MD09G1006500 // MD10G1294500 // MD17G1010400 // MD05G1312700
	GO:0010035	P	response to inorganic substance	82	677	2884	39869	5.2e-06	0.00069	// MD17G1011500 // MD11G1229700 // MD16G1201400 // MD02G1190300 // MD10G1073500 // MD10G1281000 // MD15G1067900 // MD14G1102600 // MD12G1137900 // MD14G1240600 // MD13G1147700 // MD07G1297100 // MD13G1107500 // MD09G1141700 // MD01G1071800 // MD02G1005800 // MD00G1069800 // MD04G1111400 // MD03G1222700 // MD02G1266900 // MD14G1125900 // MD03G1215000 // MD01G1074700 // MD08G1190800 // MD13G1201500…
	GO:0009628	P	response to abiotic stimulus	143	677	5856	39869	5.2e-06	0.00069	// MD13G1147700 // MD06G1051800 // MD03G1292300 // MD00G1148200 // MD15G1071000 // MD00G1221400 // MD17G1272100 // MD14G1018700 // MD01G1118300 // MD06G1128400 // MD05G1305700 // MD06G1036600 // MD09G1035100 // MD00G1038400 // MD15G1125000 // MD01G1087300 // MD03G1117900 // MD14G1039100 // MD02G1267000 // MD08G1087700 // MD07G1186300 // MD13G1222900 // MD12G1116700 // MD07G1271400 // MD01G1118000…
	GO:0046148	P	pigment biosynthetic process	29	677	653	39869	5.6e-06	0.00072	// MD04G1003400 // MD01G1118000 // MD07G1309000 // MD00G1187100 // MD11G1316800 // MD13G1200600 // MD17G1272100 // MD01G1118300 // MD15G1410400 // MD09G1033600 // MD01G1236300 // MD06G1160600 // MD09G1177500 // MD00G1186900 // MD04G1148000 // MD08G1121600 // MD09G1278600 // MD07G1306900 // MD14G1039100 // MD04G1003000 // MD12G1257000 // MD01G1118100 // MD07G1186300 // MD05G1235000 // MD11G1269800…
	GO:0006811	P	ion transport	71	677	2395	39869	6.2e-06	0.00078	// MD17G1011500 // MD11G1229700 // MD16G1090000 // MD15G1343500 // MD09G1028900 // MD01G1214700 // MD16G1079100 // MD13G1205200 // MD07G1075600 // MD03G1242000 // MD09G1219100 // MD17G1052000 // MD14G1194100 // MD15G1241400 // MD04G1134100 // MD02G1054900 // MD04G1187600 // MD00G1102700 // MD00G1069800 // MD00G1140000 // MD07G1046300 // MD15G1072600 // MD13G1050400 // MD03G1215000 // MD16G1047300…
	GO:0009719	P	response to endogenous stimulus	97	677	3637	39869	8.8e-06	0.0011	// MD08G1015500 // MD15G1298700 // MD13G1147700 // MD06G1051800 // MD05G1196800 // MD09G1027900 // MD01G1118300 // MD03G1019900 // MD03G1230900 // MD00G1038400 // MD06G1089500 // MD11G1252200 // MD13G1234500 // MD08G1161700 // MD09G1111200 // MD03G1020000 // MD01G1118000 // MD01G1168600 // MD11G1269800 // MD10G1190400 // MD15G1125000 // MD15G1075800 // MD17G1070700 // MD05G1329600 // MD07G1266500…
	GO:0044699	P	single-organism process	406	677	20599	39869	1e-05	0.0012	// MD10G1283900 // MD10G1306800 // MD11G1109700 // MD17G1052000 // MD13G1147700 // MD03G1292300 // MD00G1221400 // MD04G1111400 // MD11G1286200 // MD09G1142300 // MD09G1035100 // MD00G1038400 // MD13G1234500 // MD10G1088100 // MD14G1039100 // MD00G1148200 // MD15G1410400 // MD05G1207000 // MD03G1051000 // MD05G1122600 // MD05G1329600 // MD13G1116100 // MD12G1139500 // MD15G1146700 // MD06G1082500…
	GO:0071705	P	nitrogen compound transport	49	677	1474	39869	1.2e-05	0.0014	// MD17G1011500 // MD11G1229700 // MD15G1343500 // MD09G1028900 // MD14G1125900 // MD10G1324500 // MD17G1030600 // MD09G1211700 // MD11G1213500 // MD01G1163900 // MD00G1140000 // MD07G1230600 // MD03G1215000 // MD03G1242000 // MD04G1090500 // MD06G1029400 // MD10G1111000 // MD15G1443100 // MD09G1035100 // MD14G1124200 // MD07G1295600 // MD12G1000800 // MD06G1116800 // MD07G1075600 // MD03G1029900…
	GO:0019748	P	secondary metabolic process	45	677	1322	39869	1.5e-05	0.0018	// MD17G1011500 // MD11G1229700 // MD10G1283900 // MD16G1201400 // MD13G1201500 // MD10G1324500 // MD01G1168600 // MD11G1213500 // MD08G1009200 // MD00G1221400 // MD17G1272100 // MD04G1111400 // MD00G1072500 // MD03G1215000 // MD06G1029400 // MD06G1036600 // MD05G1123700 // MD00G1038400 // MD04G1003400 // MD05G1359400 // MD04G1112000 // MD04G1148000 // MD13G1255400 // MD04G1003000 // MD09G1111200…
	GO:0009725	P	response to hormone	87	677	3220	39869	1.7e-05	0.0019	// MD08G1015500 // MD15G1298700 // MD13G1147700 // MD06G1051800 // MD05G1196800 // MD09G1027900 // MD01G1118300 // MD03G1019900 // MD03G1230900 // MD00G1038400 // MD06G1089500 // MD11G1252200 // MD13G1234500 // MD12G1210300 // MD03G1020000 // MD01G1118000 // MD01G1168600 // MD11G1269800 // MD10G1190400 // MD15G1125000 // MD15G1075800 // MD17G1070700 // MD02G1151700 // MD15G1411200 // MD03G1273300…
	GO:0010033	P	response to organic substance	133	677	5516	39869	2.2e-05	0.0025	// MD08G1015500 // MD15G1298700 // MD13G1147700 // MD06G1051800 // MD05G1196800 // MD09G1027900 // MD17G1272100 // MD01G1118300 // MD03G1019900 // MD03G1230900 // MD06G1036600 // MD05G1123700 // MD00G1038400 // MD15G1125000 // MD01G1087300 // MD11G1252200 // MD13G1234500 // MD08G1161700 // MD06G1012500 // MD09G1111200 // MD03G1020000 // MD01G1118000 // MD01G1168600 // MD11G1269800 // MD15G1410400…
	GO:0009414	P	response to water deprivation	33	677	865	39869	2.6e-05	0.0028	// MD11G1229700 // MD07G1297100 // MD02G1190300 // MD14G1019500 // MD10G1281000 // MD03G1177200 // MD14G1240600 // MD13G1147700 // MD06G1051800 // MD13G1107500 // MD09G1141700 // MD01G1071800 // MD01G1074700 // MD03G1222700 // MD03G1215000 // MD04G1197500 // MD01G1226600 // MD13G1061900 // MD08G1004500 // MD15G1372900 // MD03G1117900 // MD05G1242300 // MD02G1267000 // MD12G1116700 // MD06G1089500…
	GO:0006972	P	hyperosmotic response	26	677	606	39869	2.9e-05	0.0032	// MD16G1201400 // MD13G1201500 // MD14G1240600 // MD09G1211700 // MD07G1297100 // MD13G1107500 // MD09G1141700 // MD01G1074700 // MD03G1222700 // MD14G1019500 // MD01G1226600 // MD17G1230800 // MD06G1089500 // MD08G1004500 // MD15G1067900 // MD08G1091700 // MD13G1181700 // MD13G1181800 // MD13G1111300 // MD15G1125000 // MD15G1075800 // MD00G1012200 // MD06G1051800 // MD03G1273300 // MD10G1252600…
	GO:0009415	P	response to water	33	677	875	39869	3.2e-05	0.0034	// MD11G1229700 // MD07G1297100 // MD02G1190300 // MD14G1019500 // MD10G1281000 // MD03G1177200 // MD14G1240600 // MD13G1147700 // MD06G1051800 // MD13G1107500 // MD09G1141700 // MD01G1071800 // MD01G1074700 // MD03G1222700 // MD03G1215000 // MD04G1197500 // MD01G1226600 // MD13G1061900 // MD08G1004500 // MD15G1372900 // MD03G1117900 // MD05G1242300 // MD02G1267000 // MD12G1116700 // MD06G1089500…
	GO:0009685	P	gibberellin metabolic process	10	677	112	39869	4.1e-05	0.0042	// MD14G1227500 // MD05G1207000 // MD11G1284300 // MD16G1040800 // MD10G1194100 // MD01G1077900 // MD13G1008700 // MD01G1077800 // MD11G1225400 // MD11G1225300
	GO:0071229	P	cellular response to acid chemical	48	677	1531	39869	5.8e-05	0.0059	// MD08G1110500 // MD11G1229700 // MD07G1297100 // MD14G1019500 // MD10G1281000 // MD06G1051800 // MD13G1107500 // MD09G1141700 // MD05G1196800 // MD01G1168600 // MD04G1187600 // MD01G1234100 // MD09G1027900 // MD01G1074700 // MD03G1222700 // MD12G1178800 // MD03G1019900 // MD03G1215000 // MD01G1077900 // MD05G1354000 // MD04G1197500 // MD01G1077800 // MD01G1226600 // MD00G1038400 // MD15G1125000…
	GO:0016101	P	diterpenoid metabolic process	10	677	120	39869	7e-05	0.0068	// MD14G1227500 // MD05G1207000 // MD11G1284300 // MD16G1040800 // MD10G1194100 // MD01G1077900 // MD13G1008700 // MD01G1077800 // MD11G1225400 // MD11G1225300
	GO:0009060	P	aerobic respiration	10	677	120	39869	7e-05	0.0068	// MD15G1263800 // MD16G1050300 // MD00G1012200 // MD16G1236400 // MD12G1176400 // MD13G1049200 // MD03G1292300 // MD12G1175200 // MD17G1230800 // MD03G1242000
	GO:2001141	P	regulation of RNA biosynthetic process	97	677	3847	39869	7.4e-05	0.0069	// MD08G1015500 // MD06G1051800 // MD04G1100400 // MD14G1203000 // MD03G1019900 // MD14G1004600 // MD08G1218800 // MD09G1035100 // MD06G1089500 // MD04G1116200 // MD13G1234500 // MD08G1030400 // MD14G1240300 // MD06G1012500 // MD09G1111200 // MD03G1020000 // MD02G1039800 // MD07G1271400 // MD01G1168600 // MD11G1269800 // MD14G1148600 // MD13G1061900 // MD13G1045700 // MD02G1151700 // MD06G1158800…
	GO:0006355	P	regulation of transcription, DNA-templated	97	677	3847	39869	7.4e-05	0.0069	// MD08G1015500 // MD06G1051800 // MD04G1100400 // MD14G1203000 // MD03G1019900 // MD14G1004600 // MD08G1218800 // MD09G1035100 // MD06G1089500 // MD04G1116200 // MD13G1234500 // MD08G1030400 // MD14G1240300 // MD06G1012500 // MD09G1111200 // MD03G1020000 // MD02G1039800 // MD07G1271400 // MD01G1168600 // MD11G1269800 // MD14G1148600 // MD13G1061900 // MD13G1045700 // MD02G1151700 // MD06G1158800…
	GO:1903506	P	regulation of nucleic acid-templated transcription	97	677	3847	39869	7.4e-05	0.0069	// MD08G1015500 // MD06G1051800 // MD04G1100400 // MD14G1203000 // MD03G1019900 // MD14G1004600 // MD08G1218800 // MD09G1035100 // MD06G1089500 // MD04G1116200 // MD13G1234500 // MD08G1030400 // MD14G1240300 // MD06G1012500 // MD09G1111200 // MD03G1020000 // MD02G1039800 // MD07G1271400 // MD01G1168600 // MD11G1269800 // MD14G1148600 // MD13G1061900 // MD13G1045700 // MD02G1151700 // MD06G1158800…
	GO:0009753	P	response to jasmonic acid	36	677	1043	39869	8.2e-05	0.0075	// MD14G1019500 // MD04G1003400 // MD13G1107500 // MD01G1234100 // MD09G1027900 // MD01G1074700 // MD03G1222700 // MD03G1019900 // MD09G1142300 // MD05G1354000 // MD04G1197500 // MD04G1134100 // MD00G1038400 // MD16G1083300 // MD08G1091700 // MD09G1278600 // MD08G1161700 // MD04G1003000 // MD03G1020000 // MD13G1163300 // MD01G1168600 // MD11G1269800 // MD17G1261000 // MD08G1220500 // MD10G1190400…
	GO:0009743	P	response to carbohydrate	31	677	842	39869	8.5e-05	0.0076	// MD15G1298700 // MD04G1003400 // MD01G1118000 // MD07G1309000 // MD13G1107500 // MD13G1200600 // MD02G1187800 // MD17G1272100 // MD01G1074700 // MD00G1072500 // MD03G1297100 // MD06G1036600 // MD01G1236300 // MD17G1230800 // MD01G1087300 // MD08G1121600 // MD00G1149300 // MD07G1306900 // MD06G1077700 // MD05G1242300 // MD04G1003000 // MD01G1118100 // MD07G1186300 // MD01G1118300 // MD05G1235000…
	GO:1901565	P	organonitrogen compound catabolic process	26	677	649	39869	8.7e-05	0.0077	// MD16G1201400 // MD13G1201500 // MD09G1033600 // MD03G1177200 // MD06G1235500 // MD00G1131800 // MD02G1120100 // MD06G1029400 // MD09G1035100 // MD00G1038400 // MD07G1025100 // MD00G1186900 // MD02G1306200 // MD05G1314100 // MD16G1061000 // MD14G1066000 // MD09G1177500 // MD12G1116700 // MD02G1069100 // MD13G1079500 // MD17G1070700 // MD04G1070300 // MD07G1018400 // MD04G1096200 // MD08G1092600…
	GO:0051252	P	regulation of RNA metabolic process	97	677	3879	39869	9.9e-05	0.0087	// MD08G1015500 // MD06G1051800 // MD04G1100400 // MD14G1203000 // MD03G1019900 // MD14G1004600 // MD08G1218800 // MD09G1035100 // MD06G1089500 // MD04G1116200 // MD13G1234500 // MD08G1030400 // MD14G1240300 // MD06G1012500 // MD09G1111200 // MD03G1020000 // MD02G1039800 // MD07G1271400 // MD01G1168600 // MD11G1269800 // MD14G1148600 // MD13G1061900 // MD13G1045700 // MD02G1151700 // MD06G1158800…
	GO:0006099	P	tricarboxylic acid cycle	6	677	40	39869	0.00011	0.0094	// MD15G1263800 // MD16G1050300 // MD13G1049200 // MD03G1292300 // MD17G1230800 // MD03G1242000
	GO:0009889	P	regulation of biosynthetic process	110	677	4543	39869	0.00011	0.0094	// MD08G1015500 // MD10G1283900 // MD06G1051800 // MD04G1100400 // MD14G1203000 // MD00G1221400 // MD17G1272100 // MD03G1019900 // MD14G1004600 // MD08G1218800 // MD09G1035100 // MD13G1061900 // MD04G1116200 // MD13G1234500 // MD08G1030400 // MD14G1240300 // MD06G1012500 // MD09G1111200 // MD03G1020000 // MD02G1039800 // MD07G1271400 // MD01G1168600 // MD11G1269800 // MD14G1148600 // MD06G1089500…
	GO:0001101	P	response to acid chemical	77	677	2915	39869	0.00011	0.0094	// MD17G1105700 // MD11G1229700 // MD07G1297100 // MD02G1190300 // MD01G1071800 // MD14G1019500 // MD10G1281000 // MD04G1003400 // MD03G1177200 // MD14G1240600 // MD13G1147700 // MD06G1051800 // MD13G1107500 // MD09G1141700 // MD05G1196800 // MD01G1168600 // MD04G1187600 // MD16G1040800 // MD09G1027900 // MD01G1074700 // MD03G1222700 // MD12G1178800 // MD03G1019900 // MD03G1215000 // MD17G1261000…
	GO:0015706	P	nitrate transport	17	677	339	39869	0.00012	0.01	// MD17G1011500 // MD11G1229700 // MD09G1028900 // MD03G1215000 // MD16G1222100 // MD14G1179400 // MD08G1190800 // MD17G1030600 // MD06G1029400 // MD15G1146700 // MD10G1111000 // MD09G1035100 // MD03G1242000 // MD05G1295700 // MD13G1045700 // MD16G1047300 // MD13G1079500
	GO:0007154	P	cell communication	121	677	5141	39869	0.00015	0.012	// MD10G1306800 // MD17G1052000 // MD06G1051800 // MD15G1039300 // MD00G1148200 // MD12G1034100 // MD03G1019900 // MD03G1230900 // MD14G1004600 // MD05G1246500 // MD03G1138500 // MD00G1038400 // MD15G1125000 // MD01G1087300 // MD11G1252200 // MD05G1314100 // MD04G1148000 // MD14G1039100 // MD09G1111200 // MD03G1020000 // MD01G1168600 // MD11G1269800 // MD03G1242000 // MD14G1148600 // MD06G1089500…
	GO:0019438	P	aromatic compound biosynthetic process	133	677	5775	39869	0.00017	0.014	// MD08G1015500 // MD10G1283900 // MD06G1051800 // MD07G1271300 // MD04G1100400 // MD14G1203000 // MD00G1221400 // MD03G1019900 // MD14G1004600 // MD12G1132100 // MD06G1036600 // MD08G1218800 // MD09G1035100 // MD13G1061900 // MD04G1116200 // MD15G1133100 // MD04G1148000 // MD13G1234500 // MD08G1030400 // MD14G1039100 // MD06G1012500 // MD09G1111200 // MD03G1020000 // MD02G1039800 // MD07G1271400…
	GO:0009733	P	response to auxin	30	677	843	39869	0.00019	0.015	// MD08G1015500 // MD04G1122800 // MD14G1019500 // MD04G1003400 // MD16G1056400 // MD13G1107500 // MD04G1187600 // MD01G1234100 // MD01G1074700 // MD01G1118300 // MD03G1222700 // MD03G1297100 // MD08G1121600 // MD06G1029400 // MD11G1172700 // MD16G1083300 // MD13G1234500 // MD04G1003000 // MD01G1118100 // MD07G1186300 // MD01G1118000 // MD08G1151300 // MD06G1089500 // MD08G1168600 // MD10G1198400…
	GO:0009416	P	response to light stimulus	67	677	2501	39869	0.00022	0.017	// MD03G1166600 // MD04G1003400 // MD00G1140300 // MD05G1306400 // MD09G1009100 // MD05G1235000 // MD07G1309000 // MD01G1041900 // MD13G1059300 // MD11G1279800 // MD00G1132400 // MD13G1200600 // MD15G1172200 // MD00G1221400 // MD17G1272100 // MD02G1005800 // MD00G1072500 // MD06G1128400 // MD05G1065500 // MD03G1297100 // MD15G1374500 // MD09G1033600 // MD14G1148600 // MD08G1087700 // MD04G1096200…
	GO:0006810	P	transport	150	677	6704	39869	0.00023	0.017	// MD15G1343500 // MD17G1052000 // MD03G1216700 // MD00G1069800 // MD07G1046300 // MD03G1019900 // MD16G1047300 // MD03G1138500 // MD16G1109500 // MD00G1038400 // MD13G1144600 // MD15G1125000 // MD01G1087300 // MD07G1295600 // MD06G1116800 // MD06G1124600 // MD14G1039100 // MD02G1267000 // MD09G1111200 // MD03G1020000 // MD17G1070700 // MD01G1168600 // MD11G1269800 // MD03G1242000 // MD12G1132100…
	GO:0071396	P	cellular response to lipid	28	677	773	39869	0.00024	0.018	// MD08G1110500 // MD07G1297100 // MD14G1019500 // MD06G1051800 // MD13G1107500 // MD09G1141700 // MD05G1196800 // MD01G1074700 // MD03G1222700 // MD12G1178800 // MD01G1077900 // MD05G1354000 // MD04G1197500 // MD01G1077800 // MD01G1226600 // MD06G1089500 // MD08G1091700 // MD13G1061900 // MD15G1125000 // MD15G1075800 // MD12G1210300 // MD11G1284300 // MD02G1151700 // MD03G1273300 // MD10G1252600…
	GO:0018130	P	heterocycle biosynthetic process	128	677	5566	39869	0.00025	0.019	// MD08G1015500 // MD10G1283900 // MD06G1051800 // MD07G1271300 // MD04G1100400 // MD14G1203000 // MD00G1221400 // MD01G1101700 // MD03G1019900 // MD14G1004600 // MD12G1132100 // MD08G1218800 // MD09G1035100 // MD13G1061900 // MD04G1116200 // MD15G1133100 // MD04G1148000 // MD11G1255300 // MD13G1234500 // MD08G1030400 // MD14G1039100 // MD06G1012500 // MD09G1111200 // MD03G1020000 // MD02G1039800…
	GO:0032870	P	cellular response to hormone stimulus	49	677	1685	39869	0.00027	0.02	// MD08G1110500 // MD07G1297100 // MD04G1122800 // MD14G1019500 // MD06G1051800 // MD13G1107500 // MD09G1141700 // MD05G1196800 // MD04G1187600 // MD11G1154200 // MD01G1234100 // MD09G1027900 // MD01G1074700 // MD03G1222700 // MD12G1178800 // MD03G1019900 // MD03G1230900 // MD01G1077900 // MD05G1354000 // MD06G1029400 // MD04G1197500 // MD01G1077800 // MD01G1226600 // MD00G1038400 // MD03G1020200…
	GO:0080090	P	regulation of primary metabolic process	116	677	4963	39869	0.00028	0.02	// MD08G1015500 // MD10G1283900 // MD06G1051800 // MD04G1100400 // MD14G1203000 // MD00G1221400 // MD17G1272100 // MD03G1019900 // MD14G1004600 // MD08G1218800 // MD09G1035100 // MD00G1038400 // MD13G1061900 // MD04G1116200 // MD13G1234500 // MD08G1030400 // MD14G1240300 // MD06G1012500 // MD09G1111200 // MD03G1020000 // MD02G1039800 // MD07G1271400 // MD01G1168600 // MD11G1269800 // MD14G1148600…
	GO:0010647	P	positive regulation of cell communication	7	677	70	39869	0.00031	0.022	// MD15G1075800 // MD08G1091700 // MD07G1115200 // MD15G1172700 // MD03G1273300 // MD02G1031100 // MD15G1125000
	GO:0044272	P	sulfur compound biosynthetic process	19	677	440	39869	0.00031	0.022	// MD05G1359400 // MD04G1111400 // MD16G1201400 // MD04G1148000 // MD01G1168600 // MD13G1201500 // MD09G1177500 // MD02G1158600 // MD12G1161400 // MD04G1112000 // MD13G1222900 // MD00G1187100 // MD13G1111300 // MD00G1038400 // MD02G1190300 // MD06G1082500 // MD09G1033600 // MD01G1024600 // MD00G1186900
	GO:0009699	P	phenylpropanoid biosynthetic process	18	677	408	39869	0.00035	0.024	// MD00G1221400 // MD17G1011500 // MD10G1283900 // MD00G1072500 // MD08G1243000 // MD04G1003400 // MD03G1051000 // MD04G1003000 // MD04G1096200 // MD06G1036600 // MD11G1012500 // MD12G1116700 // MD16G1222100 // MD08G1242900 // MD11G1299600 // MD17G1224900 // MD08G1009200 // MD14G1128200
	GO:0071495	P	cellular response to endogenous stimulus	49	677	1711	39869	0.00038	0.026	// MD08G1110500 // MD07G1297100 // MD04G1122800 // MD14G1019500 // MD06G1051800 // MD13G1107500 // MD09G1141700 // MD05G1196800 // MD04G1187600 // MD11G1154200 // MD01G1234100 // MD09G1027900 // MD01G1074700 // MD03G1222700 // MD12G1178800 // MD03G1019900 // MD03G1230900 // MD01G1077900 // MD05G1354000 // MD06G1029400 // MD04G1197500 // MD01G1077800 // MD01G1226600 // MD00G1038400 // MD03G1020200…
	GO:0009755	P	hormone-mediated signaling pathway	47	677	1630	39869	0.00043	0.03	// MD08G1110500 // MD07G1297100 // MD04G1122800 // MD14G1019500 // MD06G1051800 // MD13G1107500 // MD09G1141700 // MD11G1154200 // MD01G1234100 // MD09G1027900 // MD01G1074700 // MD03G1222700 // MD12G1178800 // MD03G1019900 // MD03G1230900 // MD01G1077900 // MD05G1354000 // MD06G1029400 // MD04G1197500 // MD01G1077800 // MD01G1226600 // MD00G1038400 // MD03G1020200 // MD15G1125000 // MD12G1034100…
	GO:0009805	P	coumarin biosynthetic process	11	677	183	39869	0.00046	0.03	// MD00G1221400 // MD08G1243000 // MD10G1283900 // MD16G1222100 // MD04G1096200 // MD03G1051000 // MD12G1116700 // MD08G1242900 // MD11G1299600 // MD17G1224900 // MD14G1128200
	GO:0009804	P	coumarin metabolic process	11	677	183	39869	0.00046	0.03	// MD00G1221400 // MD08G1243000 // MD10G1283900 // MD16G1222100 // MD04G1096200 // MD03G1051000 // MD12G1116700 // MD08G1242900 // MD11G1299600 // MD17G1224900 // MD14G1128200
	GO:0006721	P	terpenoid metabolic process	21	677	530	39869	0.00046	0.03	// MD14G1227500 // MD05G1207000 // MD11G1225300 // MD04G1148000 // MD11G1225400 // MD10G1194100 // MD09G1177500 // MD14G1039100 // MD09G1033600 // MD01G1077900 // MD12G1257000 // MD00G1187100 // MD01G1077800 // MD16G1040800 // MD00G1132400 // MD12G1161400 // MD02G1190300 // MD06G1160600 // MD11G1284300 // MD13G1008700 // MD00G1186900
	GO:0097306	P	cellular response to alcohol	21	677	537	39869	0.00054	0.035	// MD08G1110500 // MD12G1178800 // MD01G1074700 // MD07G1297100 // MD03G1222700 // MD01G1226600 // MD14G1019500 // MD12G1210300 // MD06G1051800 // MD04G1197500 // MD03G1273300 // MD13G1107500 // MD09G1141700 // MD05G1196800 // MD10G1252600 // MD16G1060400 // MD01G1041900 // MD13G1061900 // MD15G1125000 // MD10G1258700 // MD06G1089500
	GO:0071215	P	cellular response to abscisic acid stimulus	21	677	537	39869	0.00054	0.035	// MD08G1110500 // MD12G1178800 // MD01G1074700 // MD07G1297100 // MD03G1222700 // MD01G1226600 // MD14G1019500 // MD12G1210300 // MD06G1051800 // MD04G1197500 // MD03G1273300 // MD13G1107500 // MD09G1141700 // MD05G1196800 // MD10G1252600 // MD16G1060400 // MD01G1041900 // MD13G1061900 // MD15G1125000 // MD10G1258700 // MD06G1089500
	GO:0097659	P	nucleic acid-templated transcription	99	677	4183	39869	0.00056	0.035	// MD08G1015500 // MD06G1051800 // MD07G1271300 // MD04G1100400 // MD14G1203000 // MD03G1019900 // MD14G1004600 // MD08G1218800 // MD09G1035100 // MD06G1089500 // MD04G1116200 // MD13G1234500 // MD08G1030400 // MD14G1240300 // MD06G1012500 // MD09G1111200 // MD03G1020000 // MD02G1039800 // MD07G1271400 // MD01G1168600 // MD11G1269800 // MD14G1148600 // MD13G1061900 // MD13G1045700 // MD02G1151700…
	GO:0006351	P	transcription, DNA-templated	99	677	4183	39869	0.00056	0.035	// MD08G1015500 // MD06G1051800 // MD07G1271300 // MD04G1100400 // MD14G1203000 // MD03G1019900 // MD14G1004600 // MD08G1218800 // MD09G1035100 // MD06G1089500 // MD04G1116200 // MD13G1234500 // MD08G1030400 // MD14G1240300 // MD06G1012500 // MD09G1111200 // MD03G1020000 // MD02G1039800 // MD07G1271400 // MD01G1168600 // MD11G1269800 // MD14G1148600 // MD13G1061900 // MD13G1045700 // MD02G1151700…
	GO:1901362	P	organic cyclic compound biosynthetic process	137	677	6159	39869	0.00058	0.036	// MD08G1015500 // MD10G1283900 // MD06G1051800 // MD07G1271300 // MD04G1100400 // MD14G1203000 // MD00G1221400 // MD01G1101700 // MD03G1019900 // MD14G1004600 // MD12G1132100 // MD06G1036600 // MD08G1218800 // MD09G1035100 // MD13G1061900 // MD04G1116200 // MD15G1133100 // MD04G1148000 // MD10G1058300 // MD11G1255300 // MD13G1234500 // MD08G1030400 // MD14G1039100 // MD06G1012500 // MD09G1111200…
	GO:0009738	P	abscisic acid-activated signaling pathway	20	677	504	39869	0.00061	0.037	// MD08G1110500 // MD01G1074700 // MD07G1297100 // MD03G1222700 // MD12G1178800 // MD14G1019500 // MD12G1210300 // MD06G1051800 // MD04G1197500 // MD03G1273300 // MD13G1107500 // MD09G1141700 // MD01G1226600 // MD10G1252600 // MD16G1060400 // MD01G1041900 // MD13G1061900 // MD15G1125000 // MD10G1258700 // MD06G1089500
	GO:0019219	P	regulation of nucleobase-containing compound metabolic process	97	677	4092	39869	0.00061	0.037	// MD08G1015500 // MD06G1051800 // MD04G1100400 // MD14G1203000 // MD03G1019900 // MD14G1004600 // MD08G1218800 // MD09G1035100 // MD06G1089500 // MD04G1116200 // MD13G1234500 // MD08G1030400 // MD14G1240300 // MD06G1012500 // MD09G1111200 // MD03G1020000 // MD02G1039800 // MD07G1271400 // MD01G1168600 // MD11G1269800 // MD14G1148600 // MD13G1061900 // MD13G1045700 // MD02G1151700 // MD06G1158800…
	GO:0051234	P	establishment of localization	150	677	6854	39869	0.0006	0.037	// MD15G1343500 // MD17G1052000 // MD03G1216700 // MD00G1069800 // MD07G1046300 // MD03G1019900 // MD16G1047300 // MD03G1138500 // MD16G1109500 // MD00G1038400 // MD13G1144600 // MD15G1125000 // MD01G1087300 // MD07G1295600 // MD06G1116800 // MD06G1124600 // MD14G1039100 // MD02G1267000 // MD09G1111200 // MD03G1020000 // MD17G1070700 // MD01G1168600 // MD11G1269800 // MD03G1242000 // MD12G1132100…
	GO:0032774	P	RNA biosynthetic process	99	677	4195	39869	0.00061	0.037	// MD08G1015500 // MD06G1051800 // MD07G1271300 // MD04G1100400 // MD14G1203000 // MD03G1019900 // MD14G1004600 // MD08G1218800 // MD09G1035100 // MD06G1089500 // MD04G1116200 // MD13G1234500 // MD08G1030400 // MD14G1240300 // MD06G1012500 // MD09G1111200 // MD03G1020000 // MD02G1039800 // MD07G1271400 // MD01G1168600 // MD11G1269800 // MD14G1148600 // MD13G1061900 // MD13G1045700 // MD02G1151700…
	GO:0009723	P	response to ethylene	25	677	705	39869	0.00067	0.04	// MD08G1110500 // MD14G1019500 // MD06G1051800 // MD03G1281500 // MD09G1141700 // MD15G1289800 // MD11G1154200 // MD09G1027900 // MD01G1074700 // MD03G1222700 // MD03G1297100 // MD15G1290300 // MD01G1041900 // MD12G1034100 // MD16G1083300 // MD08G1091700 // MD13G1234500 // MD13G1163300 // MD06G1089500 // MD15G1075800 // MD09G1074300 // MD03G1273300 // MD10G1252600 // MD13G1107500 // MD10G1258700
	GO:0006970	P	response to osmotic stress	51	677	1857	39869	0.00073	0.042	// MD17G1105700 // MD16G1201400 // MD15G1071000 // MD13G1201500 // MD00G1140300 // MD14G1240600 // MD09G1211700 // MD13G1147700 // MD07G1297100 // MD15G1241400 // MD09G1141700 // MD03G1292300 // MD05G1242300 // MD13G1101200 // MD01G1074700 // MD03G1222700 // MD14G1019500 // MD01G1041900 // MD11G1287900 // MD01G1226600 // MD09G1035100 // MD17G1230800 // MD15G1125000 // MD01G1087300 // MD08G1004500…
	GO:2000112	P	regulation of cellular macromolecule biosynthetic process	98	677	4178	39869	0.00079	0.046	// MD08G1015500 // MD06G1051800 // MD04G1100400 // MD14G1203000 // MD03G1019900 // MD14G1004600 // MD08G1218800 // MD09G1035100 // MD06G1089500 // MD04G1116200 // MD13G1234500 // MD08G1030400 // MD14G1240300 // MD06G1012500 // MD09G1111200 // MD03G1020000 // MD02G1039800 // MD07G1271400 // MD01G1168600 // MD11G1269800 // MD14G1148600 // MD13G1061900 // MD13G1045700 // MD02G1151700 // MD06G1158800…
	GO:0010556	P	regulation of macromolecule biosynthetic process	98	677	4178	39869	0.00079	0.046	// MD08G1015500 // MD06G1051800 // MD04G1100400 // MD14G1203000 // MD03G1019900 // MD14G1004600 // MD08G1218800 // MD09G1035100 // MD06G1089500 // MD04G1116200 // MD13G1234500 // MD08G1030400 // MD14G1240300 // MD06G1012500 // MD09G1111200 // MD03G1020000 // MD02G1039800 // MD07G1271400 // MD01G1168600 // MD11G1269800 // MD14G1148600 // MD13G1061900 // MD13G1045700 // MD02G1151700 // MD06G1158800…
	GO:0080135	P	regulation of cellular response to stress	29	677	882	39869	0.00082	0.046	// MD08G1110500 // MD15G1343500 // MD00G1140000 // MD03G1019900 // MD15G1172700 // MD05G1354000 // MD04G1197500 // MD00G1038400 // MD02G1031100 // MD07G1075600 // MD03G1020000 // MD01G1168600 // MD11G1269800 // MD09G1142300 // MD04G1134100 // MD06G1089500 // MD03G1020200 // MD12G1210300 // MD17G1070700 // MD05G1329600 // MD07G1115200 // MD05G1274700 // MD10G1306600 // MD17G1017000 // MD05G1006800…
	GO:0015833	P	peptide transport	13	677	263	39869	0.00084	0.046	// MD06G1116800 // MD07G1230600 // MD13G1213400 // MD05G1190600 // MD14G1125900 // MD06G1029400 // MD14G1193100 // MD15G1443100 // MD02G1129900 // MD14G1124200 // MD03G1029900 // MD07G1295600 // MD11G1081100
	GO:0051171	P	regulation of nitrogen compound metabolic process	101	677	4337	39869	0.00083	0.046	// MD08G1015500 // MD06G1051800 // MD04G1100400 // MD14G1203000 // MD03G1019900 // MD14G1004600 // MD08G1218800 // MD09G1035100 // MD06G1089500 // MD04G1116200 // MD13G1234500 // MD08G1030400 // MD14G1240300 // MD06G1012500 // MD09G1111200 // MD03G1020000 // MD02G1039800 // MD07G1271400 // MD01G1168600 // MD11G1269800 // MD14G1148600 // MD13G1061900 // MD13G1045700 // MD02G1151700 // MD06G1158800…
	GO:0006857	P	oligopeptide transport	13	677	263	39869	0.00084	0.046	// MD06G1116800 // MD07G1230600 // MD13G1213400 // MD05G1190600 // MD14G1125900 // MD06G1029400 // MD14G1193100 // MD15G1443100 // MD02G1129900 // MD14G1124200 // MD03G1029900 // MD07G1295600 // MD11G1081100
	GO:0016491	F	oxidoreductase activity	99	677	2884	39869	4.7e-11	4e-08	// MD15G1263800 // MD03G1005500 // MD09G1039100 // MD16G1236400 // MD15G1073200 // MD01G1060300 // MD00G1221400 // MD13G1200700 // MD09G1032900 // MD05G1234400 // MD06G1036600 // MD05G1123700 // MD00G1038400 // MD01G1077800 // MD08G1243000 // MD10G1194100 // MD13G1009500 // MD17G1070700 // MD09G1202600 // MD09G1029300 // MD00G1148200 // MD10G1190400 // MD00G1169500 // MD05G1207000 // MD03G1051000…
	GO:0008194	F	UDP-glycosyltransferase activity	33	677	509	39869	2.6e-10	1.1e-07	// MD09G1142500 // MD11G1246000 // MD15G1407300 // MD09G1135900 // MD13G1147700 // MD09G1141700 // MD02G1319100 // MD17G1099600 // MD11G1245400 // MD04G1019400 // MD15G1410400 // MD17G1099500 // MD08G1134000 // MD11G1061800 // MD10G1111000 // MD12G1012100 // MD15G1415200 // MD02G1022300 // MD04G1148000 // MD07G1306900 // MD14G1039100 // MD09G1141200 // MD12G1104800 // MD09G1142300 // MD01G1029200…
	GO:0003993	F	acid phosphatase activity	14	677	80	39869	5.8e-10	1.7e-07	// MD06G1233500 // MD10G1161900 // MD05G1174000 // MD05G1059300 // MD13G1231100 // MD04G1009700 // MD13G1064900 // MD14G1240300 // MD09G1045700 // MD06G1142200 // MD15G1020000 // MD06G1233400 // MD16G1061000 // MD13G1016100
	GO:0016758	F	transferase activity, transferring hexosyl groups	38	677	758	39869	1e-08	2.2e-06	// MD09G1142500 // MD11G1246000 // MD15G1407300 // MD01G1068800 // MD13G1147700 // MD09G1141700 // MD05G1219400 // MD02G1319100 // MD17G1099600 // MD11G1245400 // MD04G1019400 // MD10G1321600 // MD15G1410400 // MD17G1099500 // MD08G1134000 // MD11G1061800 // MD10G1111000 // MD12G1012100 // MD15G1415200 // MD02G1022300 // MD04G1148000 // MD07G1306900 // MD14G1039100 // MD09G1141200 // MD12G1104800…
	GO:0016705	F	oxidoreductase activity, acting on paired donors, with incorporation or reduction of molecular oxygen	39	677	852	39869	6.6e-08	1.1e-05	// MD08G1032900 // MD02G1190300 // MD14G1019500 // MD16G1056400 // MD13G1008700 // MD08G1121600 // MD03G1281500 // MD02G1054900 // MD01G1060300 // MD04G1002500 // MD00G1221400 // MD05G1074000 // MD14G1207600 // MD11G1074400 // MD15G1289800 // MD10G1194100 // MD15G1290300 // MD05G1354000 // MD11G1225400 // MD00G1038400 // MD01G1204500 // MD08G1033000 // MD15G1074800 // MD10G1158100 // MD10G1088100…
	GO:0016757	F	transferase activity, transferring glycosyl groups	42	677	1092	39869	1.7e-06	0.00018	// MD09G1142500 // MD11G1246000 // MD15G1407300 // MD01G1068800 // MD13G1147700 // MD09G1141700 // MD05G1219400 // MD02G1319100 // MD17G1099600 // MD11G1245400 // MD04G1019400 // MD10G1321600 // MD15G1410400 // MD17G1099500 // MD08G1134000 // MD11G1061800 // MD10G1111000 // MD12G1012100 // MD15G1415200 // MD16G1020100 // MD02G1022300 // MD04G1148000 // MD07G1306900 // MD14G1039100 // MD09G1141200…
	GO:0016628	F	oxidoreductase activity, acting on the CH-CH group of donors, NAD or NADP as acceptor	10	677	75	39869	1.6e-06	0.00018	// MD15G1402400 // MD09G1033600 // MD15G1401300 // MD15G1401800 // MD15G1073200 // MD15G1401200 // MD00G1187100 // MD15G1402800 // MD15G1402700 // MD00G1186900
	GO:0016629	F	12-oxophytodienoate reductase activity	6	677	17	39869	1.7e-06	0.00018	// MD15G1402400 // MD15G1401300 // MD15G1401800 // MD15G1401200 // MD15G1402800 // MD15G1402700
	GO:0044212	F	transcription regulatory region DNA binding	10	677	84	39869	4e-06	0.00038	// MD08G1015500 // MD07G1297100 // MD10G1324500 // MD09G1111200 // MD01G1226600 // MD09G1035100 // MD11G1213500 // MD15G1374500 // MD13G1079500 // MD05G1306600
	GO:0001067	F	regulatory region nucleic acid binding	10	677	89	39869	6.5e-06	0.0005	// MD08G1015500 // MD07G1297100 // MD10G1324500 // MD09G1111200 // MD01G1226600 // MD09G1035100 // MD11G1213500 // MD15G1374500 // MD13G1079500 // MD05G1306600
	GO:0000975	F	regulatory region DNA binding	10	677	89	39869	6.5e-06	0.0005	// MD08G1015500 // MD07G1297100 // MD10G1324500 // MD09G1111200 // MD01G1226600 // MD09G1035100 // MD11G1213500 // MD15G1374500 // MD13G1079500 // MD05G1306600
	GO:0016706	F	oxidoreductase activity, acting on paired donors, with incorporation or reduction of molecular oxygen, 2-oxoglutarate as one donor, and incorporation of one atom each of oxygen into both donors	17	677	273	39869	9.4e-06	0.00066	// MD00G1169500 // MD05G1074000 // MD08G1168600 // MD14G1207600 // MD11G1074400 // MD05G1207000 // MD10G1088100 // MD10G1194100 // MD05G1354000 // MD13G1008700 // MD16G1020100 // MD08G1121600 // MD05G1074200 // MD11G1225400 // MD02G1054900 // MD11G1225300 // MD01G1060300
	GO:0045543	F	gibberellin 2-beta-dioxygenase activity	5	677	15	39869	1.6e-05	0.0011	// MD13G1008700 // MD05G1207000 // MD10G1194100 // MD11G1225400 // MD11G1225300
	GO:0046527	F	glucosyltransferase activity	16	677	266	39869	2.5e-05	0.0015	// MD02G1022300 // MD10G1321600 // MD12G1104300 // MD15G1410400 // MD07G1306900 // MD02G1319100 // MD15G1407300 // MD17G1099500 // MD15G1146700 // MD09G1141700 // MD10G1252600 // MD10G1321800 // MD17G1099600 // MD09G1142300 // MD15G1415200 // MD10G1111000
	GO:0015198	F	oligopeptide transporter activity	7	677	47	39869	3.1e-05	0.0018	// MD14G1125900 // MD07G1295600 // MD06G1116800 // MD02G1129900 // MD14G1124200 // MD03G1029900 // MD11G1081100
	GO:0016872	F	intramolecular lyase activity	5	677	19	39869	4.2e-05	0.0022	// MD01G1118000 // MD01G1118100 // MD07G1186300 // MD01G1118300 // MD11G1284300
	GO:0015197	F	peptide transporter activity	7	677	51	39869	5e-05	0.0024	// MD14G1125900 // MD07G1295600 // MD06G1116800 // MD02G1129900 // MD14G1124200 // MD03G1029900 // MD11G1081100
	GO:0003824	F	catalytic activity	322	677	15963	39869	5e-05	0.0024	// MD15G1263800 // MD04G1077000 // MD10G1283900 // MD10G1306800 // MD11G1075900 // MD09G1142500 // MD09G1039100 // MD16G1236400 // MD09G1033600 // MD12G1103500 // MD09G1202600 // MD13G1147700 // MD06G1036600 // MD03G1292300 // MD17G1009900 // MD07G1271300 // MD15G1433500 // MD01G1060300 // MD13G1016100 // MD09G1027900 // MD01G1101700 // MD13G1200700 // MD01G1118300 // MD06G1128400 // MD09G1032900…
	GO:0035251	F	UDP-glucosyltransferase activity	14	677	230	39869	7.1e-05	0.0032	// MD02G1022300 // MD12G1104300 // MD15G1410400 // MD07G1306900 // MD02G1319100 // MD15G1407300 // MD17G1099500 // MD15G1146700 // MD09G1141700 // MD10G1252600 // MD17G1099600 // MD09G1142300 // MD15G1415200 // MD10G1111000
	GO:0016627	F	oxidoreductase activity, acting on the CH-CH group of donors	11	677	153	39869	0.00011	0.0045	// MD15G1263800 // MD15G1402400 // MD09G1033600 // MD15G1401300 // MD15G1401800 // MD15G1073200 // MD15G1401200 // MD00G1187100 // MD15G1402800 // MD15G1402700 // MD00G1186900
	GO:0001071	F	nucleic acid binding transcription factor activity	68	677	2510	39869	0.00014	0.0055	// MD08G1015500 // MD15G1271200 // MD07G1297100 // MD13G1069200 // MD16G1040800 // MD10G1280000 // MD10G1324500 // MD09G1009100 // MD03G1128800 // MD16G1069500 // MD06G1051800 // MD01G1041900 // MD13G1059300 // MD11G1316800 // MD11G1213500 // MD03G1143600 // MD14G1203000 // MD14G1227500 // MD01G1074700 // MD03G1222700 // MD05G1065500 // MD03G1297100 // MD13G1163300 // MD16G1047300 // MD15G1374500…
	GO:0003700	F	transcription factor activity, sequence-specific DNA binding	68	677	2510	39869	0.00014	0.0055	// MD08G1015500 // MD15G1271200 // MD07G1297100 // MD13G1069200 // MD16G1040800 // MD10G1280000 // MD10G1324500 // MD09G1009100 // MD03G1128800 // MD16G1069500 // MD06G1051800 // MD01G1041900 // MD13G1059300 // MD11G1316800 // MD11G1213500 // MD03G1143600 // MD14G1203000 // MD14G1227500 // MD01G1074700 // MD03G1222700 // MD05G1065500 // MD03G1297100 // MD13G1163300 // MD16G1047300 // MD15G1374500…
	GO:0051213	F	dioxygenase activity	17	677	346	39869	0.00015	0.0057	// MD00G1169500 // MD05G1074000 // MD08G1168600 // MD14G1207600 // MD11G1074400 // MD05G1207000 // MD10G1088100 // MD10G1194100 // MD05G1354000 // MD13G1008700 // MD16G1020100 // MD08G1121600 // MD05G1074200 // MD11G1225400 // MD02G1054900 // MD11G1225300 // MD01G1060300
	GO:0022892	F	substrate-specific transporter activity	52	677	1787	39869	0.00018	0.0062	// MD11G1229700 // MD16G1090000 // MD15G1343500 // MD09G1028900 // MD05G1305700 // MD01G1214700 // MD16G1079100 // MD13G1205200 // MD05G1306400 // MD17G1030600 // MD09G1219100 // MD09G1211700 // MD14G1194100 // MD01G1163900 // MD00G1140000 // MD07G1046300 // MD05G1062900 // MD14G1125900 // MD03G1215000 // MD06G1029400 // MD06G1116800 // MD16G1109500 // MD05G1122600 // MD07G1295600 // MD03G1117900…
	GO:0004497	F	monooxygenase activity	14	677	253	39869	0.00018	0.0062	// MD00G1221400 // MD08G1243000 // MD03G1051000 // MD02G1190300 // MD10G1158100 // MD05G1043200 // MD03G1005500 // MD14G1019500 // MD14G1210700 // MD16G1056400 // MD12G1257000 // MD05G1123700 // MD13G1058000 // MD08G1242900
	GO:0015020	F	glucuronosyltransferase activity	8	677	87	39869	0.0002	0.0064	// MD01G1029200 // MD11G1245400 // MD09G1142500 // MD08G1185500 // MD09G1135900 // MD00G1052900 // MD11G1246000 // MD09G1142300
	GO:0019825	F	oxygen binding	19	677	431	39869	0.00024	0.0077	// MD08G1032900 // MD07G1273000 // MD10G1158100 // MD15G1289800 // MD13G1116100 // MD14G1019500 // MD14G1210700 // MD15G1290300 // MD16G1056400 // MD12G1257000 // MD03G1281500 // MD10G1190400 // MD00G1204600 // MD00G1038400 // MD01G1204500 // MD13G1058000 // MD04G1002500 // MD08G1033000 // MD15G1074800
	GO:0042578	F	phosphoric ester hydrolase activity	25	677	659	39869	0.00026	0.0079	// MD05G1059300 // MD13G1016100 // MD10G1271300 // MD04G1197500 // MD04G1009700 // MD05G1359400 // MD10G1161900 // MD16G1061000 // MD13G1064900 // MD14G1240300 // MD01G1086500 // MD06G1142200 // MD15G1020000 // MD06G1233400 // MD17G1010400 // MD15G1125000 // MD06G1233500 // MD12G1210300 // MD05G1174000 // MD13G1231100 // MD17G1175900 // MD09G1045700 // MD09G1006500 // MD09G1195300 // MD15G1030100
	GO:0009055	F	electron carrier activity	30	677	872	39869	0.00033	0.0098	// MD15G1263800 // MD14G1019500 // MD03G1005500 // MD03G1177200 // MD16G1056400 // MD14G1124500 // MD04G1002500 // MD14G1018700 // MD15G1057800 // MD15G1289800 // MD08G1032900 // MD15G1290300 // MD00G1038400 // MD01G1204500 // MD08G1033000 // MD15G1074800 // MD08G1172400 // MD10G1158100 // MD12G1257000 // MD09G1029300 // MD10G1190400 // MD08G1063800 // MD07G1273000 // MD13G1116100 // MD14G1210700…
	GO:0008509	F	anion transmembrane transporter activity	13	677	246	39869	0.00046	0.013	// MD01G1145600 // MD07G1046300 // MD09G1028900 // MD05G1274700 // MD16G1222100 // MD17G1030600 // MD09G1219100 // MD06G1029400 // MD14G1193100 // MD13G1096700 // MD14G1179400 // MD06G1172800 // MD01G1024600
	GO:0004722	F	protein serine/threonine phosphatase activity	14	677	280	39869	0.00048	0.013	// MD06G1233500 // MD10G1161900 // MD05G1174000 // MD05G1059300 // MD13G1231100 // MD04G1009700 // MD13G1064900 // MD14G1240300 // MD01G1086500 // MD06G1142200 // MD15G1020000 // MD06G1233400 // MD16G1061000 // MD13G1016100
	GO:0015103	F	inorganic anion transmembrane transporter activity	9	677	129	39869	0.00054	0.014	// MD07G1046300 // MD09G1028900 // MD16G1222100 // MD17G1030600 // MD09G1219100 // MD06G1029400 // MD13G1096700 // MD14G1179400 // MD01G1024600
	GO:0000976	F	transcription regulatory region sequence-specific DNA binding	5	677	40	39869	0.0009	0.023	// MD15G1374500 // MD07G1297100 // MD13G1079500 // MD01G1226600 // MD09G1035100
	GO:0010181	F	FMN binding	6	677	65	39869	0.0012	0.03	// MD15G1402400 // MD15G1401300 // MD15G1401800 // MD15G1401200 // MD15G1402800 // MD15G1402700
	GO:0005215	F	transporter activity	61	677	2402	39869	0.0015	0.036	// MD11G1229700 // MD16G1090000 // MD15G1343500 // MD09G1028900 // MD14G1125900 // MD01G1214700 // MD16G1079100 // MD13G1205200 // MD05G1306400 // MD17G1030600 // MD09G1219100 // MD09G1211700 // MD14G1194100 // MD07G1205500 // MD01G1163900 // MD00G1140000 // MD07G1046300 // MD04G1187600 // MD01G1141400 // MD07G1230600 // MD03G1215000 // MD03G1029900 // MD06G1222800 // MD06G1029400 // MD15G1378200…
	GO:1990837	F	sequence-specific double-stranded DNA binding	5	677	48	39869	0.0019	0.045	// MD15G1374500 // MD07G1297100 // MD13G1079500 // MD01G1226600 // MD09G1035100
	GO:0009705	C	plant-type vacuole membrane	14	677	143	39869	4.5e-07	0.00022	// MD11G1229700 // MD01G1118300 // MD09G1028900 // MD17G1272100 // MD03G1215000 // MD04G1003400 // MD04G1003000 // MD02G1267000 // MD01G1118100 // MD07G1186300 // MD15G1019700 // MD17G1030600 // MD01G1118000 // MD02G1266900
	GO:0000325	C	plant-type vacuole	15	677	237	39869	2.6e-05	0.0062	// MD11G1229700 // MD01G1118300 // MD09G1028900 // MD17G1272100 // MD03G1215000 // MD04G1003400 // MD04G1003000 // MD02G1267000 // MD01G1118100 // MD07G1186300 // MD15G1019700 // MD17G1030600 // MD16G1109500 // MD01G1118000 // MD02G1266900
	GO:0031312	C	extrinsic component of organelle membrane	5	677	26	39869	0.00015	0.024	// MD01G1118000 // MD01G1118100 // MD07G1186300 // MD01G1118300 // MD05G1325700
	C2
	GO_acc	term_type	Term	queryitem	querytotal	bgitem	bgtotal	pvalue	FDR	entries
	GO:0007389	P	pattern specification process	19	235	759	39869	2.1e-07	0.00073	// MD05G1107800 // MD15G1191800 // MD15G1394300 // MD17G1156800 // MD10G1223800 // MD03G1118500 // MD14G1236300 // MD17G1189100 // MD02G1057200 // MD14G1090900 // MD07G1286500 // MD10G1326500 // MD06G1233700 // MD06G1226800 // MD08G1112900 // MD04G1046000 // MD14G1184100 // MD08G1022400 // MD17G1049600
	GO:0009914	P	hormone transport	10	235	254	39869	4.1e-06	0.0024	// MD09G1075600 // MD14G1236300 // MD17G1049600 // MD08G1022400 // MD14G1090900 // MD12G1259500 // MD17G1066300 // MD06G1226800 // MD08G1066400 // MD04G1243800
	GO:0009926	P	auxin polar transport	10	235	234	39869	2e-06	0.0024	// MD09G1075600 // MD14G1236300 // MD17G1049600 // MD08G1022400 // MD14G1090900 // MD12G1259500 // MD17G1066300 // MD06G1226800 // MD08G1066400 // MD04G1243800
	GO:0060918	P	auxin transport	10	235	254	39869	4.1e-06	0.0024	// MD09G1075600 // MD14G1236300 // MD17G1049600 // MD08G1022400 // MD14G1090900 // MD12G1259500 // MD17G1066300 // MD06G1226800 // MD08G1066400 // MD04G1243800
	GO:0048439	P	flower morphogenesis	8	235	137	39869	2.5e-06	0.0024	// MD15G1191800 // MD03G1118500 // MD14G1090900 // MD17G1189100 // MD02G1057200 // MD14G1236300 // MD10G1326500 // MD06G1226800
	GO:0048438	P	floral whorl development	20	235	1018	39869	3.8e-06	0.0024	// MD15G1191800 // MD14G1066100 // MD15G1394300 // MD16G1270700 // MD10G1223800 // MD14G1236300 // MD17G1189100 // MD02G1057200 // MD14G1090900 // MD07G1286500 // MD12G1066400 // MD15G1400400 // MD10G1326500 // MD06G1233700 // MD06G1226800 // MD10G1251400 // MD03G1277900 // MD17G1049600 // MD09G1275500 // MD08G1107900
	GO:0019222	P	regulation of metabolic process	58	235	5522	39869	7.3e-06	0.0032	// MD00G1176400 // MD15G1139800 // MD00G1051500 // MD05G1072500 // MD01G1146800 // MD15G1245900 // MD12G1066400 // MD02G1168000 // MD03G1110000 // MD08G1022400 // MD04G1112600 // MD03G1128900 // MD17G1238600 // MD12G1042100 // MD15G1191800 // MD17G1190000 // MD15G1394300 // MD04G1046000 // MD17G1189100 // MD17G1035400 // MD15G1180700 // MD10G1326500 // MD05G1226500 // MD14G1041300 // MD12G1231600…
	GO:0031323	P	regulation of cellular metabolic process	54	235	4973	39869	6.5e-06	0.0032	// MD00G1176400 // MD15G1139800 // MD00G1051500 // MD05G1072500 // MD01G1146800 // MD15G1245900 // MD12G1066400 // MD02G1168000 // MD03G1110000 // MD08G1022400 // MD04G1112600 // MD03G1128900 // MD17G1238600 // MD12G1042100 // MD15G1191800 // MD17G1190000 // MD17G1189100 // MD17G1035400 // MD15G1180700 // MD10G1326500 // MD05G1226500 // MD14G1041300 // MD12G1231600 // MD08G1141400 // MD15G1260000…
	GO:0065007	P	biological regulation	98	235	11424	39869	1.4e-05	0.0054	// MD07G1261100 // MD12G1042900 // MD05G1072500 // MD03G1128900 // MD08G1066400 // MD12G1042100 // MD17G1190000 // MD15G1394300 // MD17G1156800 // MD07G1244600 // MD10G1223800 // MD14G1090900 // MD00G1007000 // MD08G1112700 // MD08G1112900 // MD07G1065000 // MD10G1014200 // MD08G1048900 // MD02G1057200 // MD16G1018000 // MD07G1153300 // MD13G1014200 // MD15G1102300 // MD06G1226800 // MD00G1192900…
	GO:0010229	P	inflorescence development	5	235	52	39869	2.2e-05	0.007	// MD17G1066300 // MD09G1075600 // MD14G1236300 // MD06G1226800 // MD14G1090900
	GO:0098754	P	detoxification	5	235	51	39869	2e-05	0.007	// MD03G1128900 // MD00G1051500 // MD04G1072900 // MD03G1181400 // MD12G1231600
	GO:0050794	P	regulation of cellular process	81	235	9067	39869	3e-05	0.0086	// MD00G1176400 // MD02G1178300 // MD12G1042900 // MD15G1139800 // MD17G1154000 // MD00G1051500 // MD05G1072500 // MD01G1146800 // MD15G1245900 // MD12G1066400 // MD02G1168000 // MD03G1110000 // MD08G1022400 // MD15G1120300 // MD04G1112600 // MD07G1246200 // MD08G1140900 // MD03G1128900 // MD17G1238600 // MD12G1042100 // MD13G1169800 // MD15G1191800 // MD17G1190000 // MD15G1394300 // MD17G1156800…
	GO:0051171	P	regulation of nitrogen compound metabolic process	47	235	4337	39869	3.2e-05	0.0086	// MD00G1176400 // MD00G1051500 // MD05G1072500 // MD01G1146800 // MD15G1245900 // MD12G1066400 // MD03G1110000 // MD08G1022400 // MD04G1112600 // MD03G1128900 // MD17G1238600 // MD12G1042100 // MD15G1191800 // MD17G1190000 // MD17G1189100 // MD17G1035400 // MD15G1180700 // MD10G1326500 // MD05G1226500 // MD14G1041300 // MD12G1231600 // MD15G1260000 // MD16G1056200 // MD05G1107800 // MD14G1066100…
	GO:0003002	P	regionalization	12	235	476	39869	3.6e-05	0.009	// MD15G1394300 // MD17G1156800 // MD03G1118500 // MD14G1236300 // MD17G1049600 // MD14G1090900 // MD07G1286500 // MD10G1326500 // MD06G1233700 // MD06G1226800 // MD08G1112900 // MD04G1046000
	GO:0009733	P	response to auxin	16	235	843	39869	5.4e-05	0.011	// MD15G1191800 // MD03G1101800 // MD09G1075600 // MD07G1261100 // MD08G1112700 // MD14G1236300 // MD17G1189100 // MD02G1057200 // MD14G1090900 // MD08G1141400 // MD17G1066300 // MD06G1226800 // MD08G1112900 // MD08G1140900 // MD07G1244600 // MD17G1049600
	GO:2000112	P	regulation of cellular macromolecule biosynthetic process	45	235	4178	39869	5.6e-05	0.011	// MD00G1176400 // MD00G1051500 // MD05G1072500 // MD01G1146800 // MD15G1245900 // MD12G1066400 // MD03G1110000 // MD14G1041300 // MD04G1112600 // MD03G1128900 // MD17G1238600 // MD12G1042100 // MD15G1191800 // MD17G1190000 // MD17G1189100 // MD17G1035400 // MD15G1180700 // MD10G1326500 // MD05G1226500 // MD12G1231600 // MD15G1260000 // MD05G1107800 // MD14G1066100 // MD15G1266500 // MD08G1112900…
	GO:0009889	P	regulation of biosynthetic process	48	235	4543	39869	4.8e-05	0.011	// MD00G1176400 // MD00G1051500 // MD05G1072500 // MD01G1146800 // MD15G1245900 // MD12G1066400 // MD03G1110000 // MD14G1041300 // MD04G1112600 // MD03G1128900 // MD17G1238600 // MD12G1042100 // MD15G1191800 // MD17G1190000 // MD15G1394300 // MD17G1189100 // MD17G1035400 // MD15G1180700 // MD10G1326500 // MD05G1226500 // MD12G1231600 // MD15G1260000 // MD05G1107800 // MD14G1066100 // MD15G1266500…
	GO:0010556	P	regulation of macromolecule biosynthetic process	45	235	4178	39869	5.6e-05	0.011	// MD00G1176400 // MD00G1051500 // MD05G1072500 // MD01G1146800 // MD15G1245900 // MD12G1066400 // MD03G1110000 // MD14G1041300 // MD04G1112600 // MD03G1128900 // MD17G1238600 // MD12G1042100 // MD15G1191800 // MD17G1190000 // MD17G1189100 // MD17G1035400 // MD15G1180700 // MD10G1326500 // MD05G1226500 // MD12G1231600 // MD15G1260000 // MD05G1107800 // MD14G1066100 // MD15G1266500 // MD08G1112900…
	GO:0008361	P	regulation of cell size	5	235	73	39869	9.9e-05	0.012	// MD08G1107900 // MD14G1236300 // MD10G1251400 // MD06G1226800 // MD14G1090900
	GO:0009637	P	response to blue light	8	235	231	39869	9.1e-05	0.012	// MD13G1041800 // MD16G1018000 // MD14G1236300 // MD17G1049600 // MD17G1035400 // MD14G1090900 // MD06G1226800 // MD13G1041900
	GO:2001141	P	regulation of RNA biosynthetic process	42	235	3847	39869	7.7e-05	0.012	// MD00G1176400 // MD05G1072500 // MD01G1146800 // MD15G1245900 // MD12G1066400 // MD03G1110000 // MD14G1041300 // MD04G1112600 // MD17G1238600 // MD12G1042100 // MD15G1191800 // MD17G1190000 // MD17G1189100 // MD17G1035400 // MD15G1180700 // MD10G1326500 // MD05G1226500 // MD08G1112900 // MD15G1260000 // MD05G1107800 // MD14G1066100 // MD15G1266500 // MD03G1118500 // MD02G1057200 // MD07G1295200…
	GO:0010817	P	regulation of hormone levels	16	235	887	39869	9.7e-05	0.012	// MD17G1066300 // MD13G1052700 // MD09G1075600 // MD10G1223800 // MD14G1236300 // MD08G1086300 // MD08G1022400 // MD14G1090900 // MD12G1259500 // MD10G1326500 // MD06G1226800 // MD04G1046000 // MD05G1184800 // MD08G1066400 // MD04G1243800 // MD17G1049600
	GO:0034654	P	nucleobase-containing compound biosynthetic process	50	235	4933	39869	9.2e-05	0.012	// MD00G1176400 // MD15G1329500 // MD05G1072500 // MD01G1146800 // MD14G1236300 // MD15G1245900 // MD12G1066400 // MD03G1110000 // MD14G1041300 // MD04G1112600 // MD03G1181400 // MD17G1238600 // MD12G1042100 // MD15G1191800 // MD17G1190000 // MD17G1189100 // MD17G1035400 // MD14G1090900 // MD15G1180700 // MD10G1326500 // MD05G1226500 // MD08G1112900 // MD15G1260000 // MD05G1107800 // MD14G1066100…
	GO:0006355	P	regulation of transcription, DNA-templated	42	235	3847	39869	7.7e-05	0.012	// MD00G1176400 // MD05G1072500 // MD01G1146800 // MD15G1245900 // MD12G1066400 // MD03G1110000 // MD14G1041300 // MD04G1112600 // MD17G1238600 // MD12G1042100 // MD15G1191800 // MD17G1190000 // MD17G1189100 // MD17G1035400 // MD15G1180700 // MD10G1326500 // MD05G1226500 // MD08G1112900 // MD15G1260000 // MD05G1107800 // MD14G1066100 // MD15G1266500 // MD03G1118500 // MD02G1057200 // MD07G1295200…
	GO:1903506	P	regulation of nucleic acid-templated transcription	42	235	3847	39869	7.7e-05	0.012	// MD00G1176400 // MD05G1072500 // MD01G1146800 // MD15G1245900 // MD12G1066400 // MD03G1110000 // MD14G1041300 // MD04G1112600 // MD17G1238600 // MD12G1042100 // MD15G1191800 // MD17G1190000 // MD17G1189100 // MD17G1035400 // MD15G1180700 // MD10G1326500 // MD05G1226500 // MD08G1112900 // MD15G1260000 // MD05G1107800 // MD14G1066100 // MD15G1266500 // MD03G1118500 // MD02G1057200 // MD07G1295200…
	GO:0051252	P	regulation of RNA metabolic process	42	235	3879	39869	9.2e-05	0.012	// MD00G1176400 // MD05G1072500 // MD01G1146800 // MD15G1245900 // MD12G1066400 // MD03G1110000 // MD14G1041300 // MD04G1112600 // MD17G1238600 // MD12G1042100 // MD15G1191800 // MD17G1190000 // MD17G1189100 // MD17G1035400 // MD15G1180700 // MD10G1326500 // MD05G1226500 // MD08G1112900 // MD15G1260000 // MD05G1107800 // MD14G1066100 // MD15G1266500 // MD03G1118500 // MD02G1057200 // MD07G1295200…
	GO:0031326	P	regulation of cellular biosynthetic process	45	235	4257	39869	8.7e-05	0.012	// MD00G1176400 // MD00G1051500 // MD05G1072500 // MD01G1146800 // MD15G1245900 // MD12G1066400 // MD03G1110000 // MD14G1041300 // MD04G1112600 // MD03G1128900 // MD17G1238600 // MD12G1042100 // MD15G1191800 // MD17G1190000 // MD17G1189100 // MD17G1035400 // MD15G1180700 // MD10G1326500 // MD05G1226500 // MD12G1231600 // MD15G1260000 // MD05G1107800 // MD14G1066100 // MD15G1266500 // MD08G1112900…
	GO:0010468	P	regulation of gene expression	45	235	4255	39869	8.6e-05	0.012	// MD00G1176400 // MD00G1051500 // MD05G1072500 // MD01G1146800 // MD15G1245900 // MD12G1066400 // MD03G1110000 // MD14G1041300 // MD04G1112600 // MD03G1128900 // MD17G1238600 // MD12G1042100 // MD15G1191800 // MD17G1190000 // MD17G1189100 // MD17G1035400 // MD15G1180700 // MD10G1326500 // MD05G1226500 // MD12G1231600 // MD15G1260000 // MD05G1107800 // MD14G1066100 // MD15G1266500 // MD08G1112900…
	GO:0050789	P	regulation of biological process	87	235	10317	39869	0.00012	0.013	// MD07G1261100 // MD12G1042900 // MD05G1072500 // MD03G1128900 // MD08G1066400 // MD12G1042100 // MD17G1190000 // MD15G1394300 // MD17G1156800 // MD07G1244600 // MD10G1223800 // MD14G1090900 // MD00G1007000 // MD08G1112700 // MD08G1112900 // MD07G1065000 // MD10G1014200 // MD02G1057200 // MD15G1120300 // MD07G1153300 // MD13G1014200 // MD15G1102300 // MD06G1226800 // MD00G1192900 // MD05G1175600…
	GO:0097659	P	nucleic acid-templated transcription	44	235	4183	39869	0.00012	0.013	// MD00G1176400 // MD15G1329500 // MD05G1072500 // MD01G1146800 // MD15G1245900 // MD12G1066400 // MD03G1110000 // MD14G1041300 // MD04G1112600 // MD17G1238600 // MD12G1042100 // MD15G1191800 // MD17G1190000 // MD17G1189100 // MD17G1035400 // MD15G1180700 // MD10G1326500 // MD05G1226500 // MD08G1112900 // MD15G1260000 // MD05G1107800 // MD14G1066100 // MD15G1266500 // MD03G1118500 // MD02G1057200…
	GO:0006351	P	transcription, DNA-templated	44	235	4183	39869	0.00012	0.013	// MD00G1176400 // MD15G1329500 // MD05G1072500 // MD01G1146800 // MD15G1245900 // MD12G1066400 // MD03G1110000 // MD14G1041300 // MD04G1112600 // MD17G1238600 // MD12G1042100 // MD15G1191800 // MD17G1190000 // MD17G1189100 // MD17G1035400 // MD15G1180700 // MD10G1326500 // MD05G1226500 // MD08G1112900 // MD15G1260000 // MD05G1107800 // MD14G1066100 // MD15G1266500 // MD03G1118500 // MD02G1057200…
	GO:0034599	P	cellular response to oxidative stress	5	235	75	39869	0.00011	0.013	// MD03G1128900 // MD00G1051500 // MD04G1072900 // MD12G1231600 // MD02G1284000
	GO:0090567	P	reproductive shoot system development	26	235	1966	39869	0.00012	0.013	// MD05G1072500 // MD14G1236300 // MD12G1066400 // MD17G1066300 // MD15G1191800 // MD08G1107900 // MD15G1394300 // MD10G1223800 // MD17G1049600 // MD14G1090900 // MD07G1286500 // MD10G1326500 // MD14G1066100 // MD03G1118500 // MD02G1057200 // MD06G1233700 // MD16G1018000 // MD03G1277900 // MD16G1270700 // MD09G1275500 // MD09G1075600 // MD15G1400400 // MD06G1226800 // MD10G1251400 // MD17G1189100…
	GO:0032774	P	RNA biosynthetic process	44	235	4195	39869	0.00013	0.013	// MD00G1176400 // MD15G1329500 // MD05G1072500 // MD01G1146800 // MD15G1245900 // MD12G1066400 // MD03G1110000 // MD14G1041300 // MD04G1112600 // MD17G1238600 // MD12G1042100 // MD15G1191800 // MD17G1190000 // MD17G1189100 // MD17G1035400 // MD15G1180700 // MD10G1326500 // MD05G1226500 // MD08G1112900 // MD15G1260000 // MD05G1107800 // MD14G1066100 // MD15G1266500 // MD03G1118500 // MD02G1057200…
	GO:0009636	P	response to toxic substance	5	235	78	39869	0.00013	0.013	// MD03G1128900 // MD00G1051500 // MD04G1072900 // MD03G1181400 // MD12G1231600
	GO:0051179	P	localization	66	235	7246	39869	0.00013	0.013	// MD02G1178300 // MD03G1181400 // MD15G1139800 // MD11G1041800 // MD14G1236300 // MD13G1024300 // MD17G1066300 // MD08G1022400 // MD17G1222500 // MD13G1150700 // MD16G1145600 // MD02G1168000 // MD08G1066400 // MD06G1128500 // MD10G1305000 // MD04G1243800 // MD17G1049600 // MD17G1035400 // MD14G1090900 // MD00G1007000 // MD05G1226500 // MD07G1184000 // MD16G1027000 // MD08G1141400 // MD07G1065000…
	GO:0009855	P	determination of bilateral symmetry	8	235	254	39869	0.00017	0.016	// MD10G1223800 // MD03G1118500 // MD14G1090900 // MD14G1236300 // MD10G1326500 // MD06G1226800 // MD08G1112900 // MD14G1184100
	GO:0009799	P	specification of symmetry	8	235	256	39869	0.00018	0.017	// MD10G1223800 // MD03G1118500 // MD14G1090900 // MD14G1236300 // MD10G1326500 // MD06G1226800 // MD08G1112900 // MD14G1184100
	GO:0080090	P	regulation of primary metabolic process	49	235	4963	39869	0.00021	0.019	// MD00G1176400 // MD00G1051500 // MD05G1072500 // MD01G1146800 // MD15G1245900 // MD12G1066400 // MD03G1110000 // MD14G1041300 // MD04G1112600 // MD03G1128900 // MD17G1238600 // MD12G1042100 // MD15G1191800 // MD17G1190000 // MD15G1394300 // MD17G1189100 // MD17G1035400 // MD15G1180700 // MD10G1326500 // MD05G1226500 // MD12G1231600 // MD15G1260000 // MD16G1056200 // MD05G1107800 // MD14G1066100…
	GO:0009944	P	polarity specification of adaxial/abaxial axis	6	235	145	39869	0.00028	0.024	// MD03G1118500 // MD14G1090900 // MD14G1236300 // MD06G1233700 // MD06G1226800 // MD08G1112900
	GO:0010016	P	shoot system morphogenesis	16	235	975	39869	0.00028	0.024	// MD05G1107800 // MD17G1066300 // MD15G1394300 // MD17G1035400 // MD09G1075600 // MD03G1118500 // MD14G1236300 // MD17G1189100 // MD02G1057200 // MD14G1090900 // MD07G1286500 // MD10G1326500 // MD06G1226800 // MD08G1112900 // MD15G1191800 // MD17G1240300
	GO:0019219	P	regulation of nucleobase-containing compound metabolic process	42	235	4092	39869	0.00029	0.024	// MD00G1176400 // MD05G1072500 // MD01G1146800 // MD15G1245900 // MD12G1066400 // MD03G1110000 // MD14G1041300 // MD04G1112600 // MD17G1238600 // MD12G1042100 // MD15G1191800 // MD17G1190000 // MD17G1189100 // MD17G1035400 // MD15G1180700 // MD10G1326500 // MD05G1226500 // MD08G1112900 // MD15G1260000 // MD05G1107800 // MD14G1066100 // MD15G1266500 // MD03G1118500 // MD02G1057200 // MD07G1295200…
	GO:0065008	P	regulation of biological quality	29	235	2437	39869	0.00029	0.024	// MD12G1042900 // MD14G1236300 // MD15G1245900 // MD17G1066300 // MD08G1022400 // MD17G1222500 // MD08G1066400 // MD10G1326500 // MD10G1223800 // MD04G1046000 // MD17G1049600 // MD14G1090900 // MD08G1107900 // MD08G1112900 // MD04G1072900 // MD05G1107800 // MD08G1048900 // MD03G1118500 // MD12G1259500 // MD03G1277900 // MD05G1184800 // MD04G1243800 // MD09G1075600 // MD15G1102300 // MD08G1086300…
	GO:0010089	P	xylem development	6	235	148	39869	0.00031	0.025	// MD14G1090900 // MD14G1236300 // MD10G1071200 // MD06G1226800 // MD08G1112900 // MD04G1126500
	GO:0009943	P	adaxial/abaxial axis specification	6	235	149	39869	0.00032	0.025	// MD03G1118500 // MD14G1090900 // MD14G1236300 // MD06G1233700 // MD06G1226800 // MD08G1112900
	GO:0014070	P	response to organic cyclic compound	24	235	1864	39869	0.00033	0.025	// MD15G1139800 // MD08G1112700 // MD16G1253900 // MD01G1146800 // MD14G1236300 // MD15G1245900 // MD04G1112600 // MD05G1184800 // MD02G1168000 // MD06G1128500 // MD07G1244600 // MD02G1275900 // MD10G1196300 // MD14G1090900 // MD08G1107900 // MD05G1226500 // MD08G1141400 // MD17G1240300 // MD10G1014200 // MD07G1261100 // MD08G1140900 // MD06G1226800 // MD10G1251400 // MD14G1184100
	GO:0048367	P	shoot system development	32	235	2837	39869	0.00035	0.026	// MD05G1072500 // MD14G1236300 // MD12G1066400 // MD17G1066300 // MD15G1191800 // MD08G1107900 // MD15G1394300 // MD10G1223800 // MD04G1046000 // MD17G1189100 // MD17G1035400 // MD14G1090900 // MD07G1286500 // MD10G1326500 // MD08G1112900 // MD17G1240300 // MD05G1107800 // MD14G1066100 // MD15G1266500 // MD03G1118500 // MD02G1057200 // MD06G1233700 // MD16G1018000 // MD03G1277900 // MD16G1270700…
	GO:0010051	P	xylem and phloem pattern formation	7	235	216	39869	0.00037	0.027	// MD15G1394300 // MD03G1118500 // MD14G1090900 // MD14G1236300 // MD10G1326500 // MD06G1233700 // MD06G1226800
	GO:0006820	P	anion transport	17	235	1106	39869	0.00037	0.027	// MD13G1024300 // MD13G1169800 // MD15G1139800 // MD13G1049800 // MD11G1041800 // MD17G1035400 // MD05G1344300 // MD15G1400400 // MD13G1012600 // MD13G1150700 // MD16G1027000 // MD08G1141400 // MD08G1140900 // MD13G1071900 // MD08G1066400 // MD06G1128500 // MD17G1240300
	GO:0010087	P	phloem or xylem histogenesis	7	235	219	39869	0.0004	0.028	// MD14G1090900 // MD14G1236300 // MD10G1071200 // MD07G1205300 // MD06G1226800 // MD08G1112900 // MD04G1126500
	GO:0055085	P	transmembrane transport	22	235	1661	39869	0.00041	0.028	// MD14G1236300 // MD12G1119900 // MD17G1222500 // MD08G1066400 // MD06G1128500 // MD17G1049600 // MD14G1090900 // MD07G1184000 // MD16G1027000 // MD08G1141400 // MD13G1024300 // MD13G1087500 // MD13G1014100 // MD05G1344300 // MD08G1140900 // MD13G1014200 // MD05G1039600 // MD06G1226800 // MD08G1041400 // MD10G1045100 // MD16G1240400 // MD07G1292700
	GO:0010193	P	response to ozone	5	235	101	39869	0.00041	0.028	// MD03G1128900 // MD00G1051500 // MD08G1141400 // MD12G1231600 // MD08G1140900
	GO:0009955	P	adaxial/abaxial pattern specification	6	235	161	39869	0.00048	0.031	// MD03G1118500 // MD14G1090900 // MD14G1236300 // MD06G1233700 // MD06G1226800 // MD08G1112900
	GO:0006811	P	ion transport	28	235	2395	39869	0.00049	0.031	// MD03G1181400 // MD15G1139800 // MD11G1041800 // MD17G1222500 // MD13G1150700 // MD08G1066400 // MD06G1128500 // MD17G1035400 // MD07G1184000 // MD16G1027000 // MD08G1141400 // MD07G1065000 // MD13G1071900 // MD04G1072900 // MD17G1240300 // MD13G1024300 // MD13G1169800 // MD13G1014100 // MD05G1344300 // MD10G1078100 // MD08G1140900 // MD13G1014200 // MD13G1049800 // MD15G1400400 // MD13G1012600…
	GO:0006810	P	transport	60	235	6704	39869	0.00048	0.031	// MD02G1178300 // MD03G1181400 // MD15G1139800 // MD11G1041800 // MD14G1236300 // MD13G1024300 // MD17G1066300 // MD08G1022400 // MD17G1222500 // MD13G1150700 // MD02G1168000 // MD08G1066400 // MD06G1128500 // MD10G1305000 // MD04G1243800 // MD17G1049600 // MD17G1035400 // MD14G1090900 // MD00G1007000 // MD05G1226500 // MD07G1184000 // MD16G1027000 // MD08G1141400 // MD07G1065000 // MD13G1071900…
	GO:0009411	P	response to UV	11	235	553	39869	0.00055	0.035	// MD10G1223800 // MD00G1051500 // MD14G1090900 // MD17G1049600 // MD08G1022400 // MD14G1236300 // MD03G1101800 // MD06G1226800 // MD12G1231600 // MD03G1128900 // MD13G1052700
	GO:0065001	P	specification of axis polarity	6	235	166	39869	0.00056	0.035	// MD03G1118500 // MD14G1090900 // MD14G1236300 // MD06G1233700 // MD06G1226800 // MD08G1112900
	GO:0009908	P	flower development	24	235	1940	39869	0.00058	0.035	// MD05G1072500 // MD14G1236300 // MD12G1066400 // MD15G1191800 // MD08G1107900 // MD15G1394300 // MD10G1223800 // MD17G1049600 // MD14G1090900 // MD07G1286500 // MD10G1326500 // MD14G1066100 // MD03G1118500 // MD02G1057200 // MD06G1233700 // MD16G1018000 // MD03G1277900 // MD09G1275500 // MD16G1270700 // MD15G1400400 // MD06G1226800 // MD10G1251400 // MD17G1189100 // MD05G1175600
	GO:0043481	P	anthocyanin accumulation in tissues in response to UV light	7	235	238	39869	0.00064	0.036	// MD10G1223800 // MD14G1090900 // MD17G1049600 // MD08G1022400 // MD14G1236300 // MD06G1226800 // MD13G1052700
	GO:0043480	P	pigment accumulation in tissues	7	235	238	39869	0.00064	0.036	// MD10G1223800 // MD14G1090900 // MD17G1049600 // MD08G1022400 // MD14G1236300 // MD06G1226800 // MD13G1052700
	GO:0043473	P	pigmentation	7	235	238	39869	0.00064	0.036	// MD10G1223800 // MD14G1090900 // MD17G1049600 // MD08G1022400 // MD14G1236300 // MD06G1226800 // MD13G1052700
	GO:0043479	P	pigment accumulation in tissues in response to UV light	7	235	238	39869	0.00064	0.036	// MD10G1223800 // MD14G1090900 // MD17G1049600 // MD08G1022400 // MD14G1236300 // MD06G1226800 // MD13G1052700
	GO:0043476	P	pigment accumulation	7	235	238	39869	0.00064	0.036	// MD10G1223800 // MD14G1090900 // MD17G1049600 // MD08G1022400 // MD14G1236300 // MD06G1226800 // MD13G1052700
	GO:0043478	P	pigment accumulation in response to UV light	7	235	238	39869	0.00064	0.036	// MD10G1223800 // MD14G1090900 // MD17G1049600 // MD08G1022400 // MD14G1236300 // MD06G1226800 // MD13G1052700
	GO:0010039	P	response to iron ion	5	235	116	39869	0.00076	0.041	// MD03G1128900 // MD00G1051500 // MD04G1187700 // MD15G1033100 // MD12G1231600
	GO:0060255	P	regulation of macromolecule metabolic process	45	235	4699	39869	0.00075	0.041	// MD00G1176400 // MD00G1051500 // MD05G1072500 // MD01G1146800 // MD15G1245900 // MD12G1066400 // MD03G1110000 // MD14G1041300 // MD04G1112600 // MD03G1128900 // MD17G1238600 // MD12G1042100 // MD15G1191800 // MD17G1190000 // MD17G1189100 // MD17G1035400 // MD15G1180700 // MD10G1326500 // MD05G1226500 // MD12G1231600 // MD15G1260000 // MD05G1107800 // MD14G1066100 // MD15G1266500 // MD08G1112900…
	GO:0018130	P	heterocycle biosynthetic process	51	235	5566	39869	0.00086	0.044	// MD00G1176400 // MD15G1329500 // MD05G1072500 // MD01G1146800 // MD14G1236300 // MD15G1245900 // MD12G1066400 // MD03G1110000 // MD14G1041300 // MD04G1112600 // MD03G1181400 // MD17G1238600 // MD12G1042100 // MD15G1191800 // MD17G1190000 // MD17G1189100 // MD17G1035400 // MD14G1090900 // MD15G1180700 // MD10G1326500 // MD05G1226500 // MD08G1112900 // MD15G1260000 // MD05G1107800 // MD14G1066100…
	GO:0048364	P	root development	17	235	1194	39869	0.00086	0.044	// MD05G1107800 // MD17G1156800 // MD09G1075600 // MD10G1223800 // MD03G1118500 // MD14G1236300 // MD17G1049600 // MD08G1022400 // MD14G1090900 // MD15G1400400 // MD13G1012600 // MD17G1066300 // MD07G1205300 // MD06G1226800 // MD08G1112900 // MD13G1052700 // MD06G1128500
	GO:0051234	P	establishment of localization	60	235	6854	39869	0.00085	0.044	// MD02G1178300 // MD03G1181400 // MD15G1139800 // MD11G1041800 // MD14G1236300 // MD13G1024300 // MD17G1066300 // MD08G1022400 // MD17G1222500 // MD13G1150700 // MD02G1168000 // MD08G1066400 // MD06G1128500 // MD10G1305000 // MD04G1243800 // MD17G1049600 // MD17G1035400 // MD14G1090900 // MD00G1007000 // MD05G1226500 // MD07G1184000 // MD16G1027000 // MD08G1141400 // MD07G1065000 // MD13G1071900…
	GO:0016310	P	phosphorylation	39	235	3912	39869	0.00086	0.044	// MD15G1139800 // MD00G1051500 // MD15G1168500 // MD14G1236300 // MD10G1333200 // MD02G1168000 // MD00G1046700 // MD10G1333300 // MD10G1273300 // MD15G1394300 // MD05G1257000 // MD10G1223800 // MD05G1226500 // MD10G1196300 // MD14G1090900 // MD00G1007000 // MD08G1107900 // MD11G1268400 // MD10G1334500 // MD12G1231600 // MD08G1141400 // MD08G1125400 // MD00G1183000 // MD10G1334300 // MD00G1006800…
	GO:0022622	P	root system development	17	235	1196	39869	0.00088	0.044	// MD05G1107800 // MD17G1156800 // MD09G1075600 // MD10G1223800 // MD03G1118500 // MD14G1236300 // MD17G1049600 // MD08G1022400 // MD14G1090900 // MD15G1400400 // MD13G1012600 // MD17G1066300 // MD07G1205300 // MD06G1226800 // MD08G1112900 // MD13G1052700 // MD06G1128500
	GO:0032535	P	regulation of cellular component size	8	235	329	39869	0.0009	0.044	// MD05G1107800 // MD03G1118500 // MD14G1090900 // MD14G1236300 // MD08G1107900 // MD06G1226800 // MD10G1251400 // MD08G1112900
	GO:0090066	P	regulation of anatomical structure size	8	235	329	39869	0.0009	0.044	// MD05G1107800 // MD03G1118500 // MD14G1090900 // MD14G1236300 // MD08G1107900 // MD06G1226800 // MD10G1251400 // MD08G1112900
	GO:0001071	F	nucleic acid binding transcription factor activity	38	235	2510	39869	1.1e-07	2e-05	// MD01G1146800 // MD12G1066400 // MD03G1110000 // MD14G1041300 // MD13G1150700 // MD17G1238600 // MD12G1042100 // MD15G1191800 // MD17G1190000 // MD04G1046000 // MD17G1189100 // MD17G1035400 // MD15G1180700 // MD10G1326500 // MD08G1112900 // MD15G1260000 // MD08G1026300 // MD14G1066100 // MD15G1266500 // MD03G1118500 // MD02G1057200 // MD07G1295200 // MD02G1145800 // MD06G1233700 // MD15G1023100…
	GO:0003700	F	transcription factor activity, sequence-specific DNA binding	38	235	2510	39869	1.1e-07	2e-05	// MD01G1146800 // MD12G1066400 // MD03G1110000 // MD14G1041300 // MD13G1150700 // MD17G1238600 // MD12G1042100 // MD15G1191800 // MD17G1190000 // MD04G1046000 // MD17G1189100 // MD17G1035400 // MD15G1180700 // MD10G1326500 // MD08G1112900 // MD15G1260000 // MD08G1026300 // MD14G1066100 // MD15G1266500 // MD03G1118500 // MD02G1057200 // MD07G1295200 // MD02G1145800 // MD06G1233700 // MD15G1023100…
	GO:0005215	F	transporter activity	32	235	2402	39869	1.7e-05	0.002	// MD03G1181400 // MD15G1139800 // MD11G1041800 // MD14G1236300 // MD13G1024300 // MD14G1133400 // MD17G1222500 // MD10G1305000 // MD17G1049600 // MD14G1090900 // MD07G1184000 // MD16G1027000 // MD08G1141400 // MD13G1071900 // MD04G1138500 // MD08G1048900 // MD13G1087500 // MD13G1014100 // MD05G1344300 // MD12G1259500 // MD08G1140900 // MD04G1243800 // MD13G1014200 // MD12G1153900 // MD05G1039600…
	GO:0016773	F	phosphotransferase activity, alcohol group as acceptor	35	235	2964	39869	7.5e-05	0.0069	// MD00G1176400 // MD08G1112700 // MD15G1168500 // MD15G1245900 // MD04G1112600 // MD00G1046700 // MD10G1333300 // MD15G1394300 // MD05G1257000 // MD10G1223800 // MD11G1268400 // MD00G1007000 // MD08G1107900 // MD05G1226500 // MD10G1273300 // MD00G1006800 // MD08G1125400 // MD00G1183000 // MD05G1107800 // MD17G1154000 // MD17G1117000 // MD10G1334300 // MD02G1282000 // MD00G1024400 // MD00G1024500…
	GO:0016772	F	transferase activity, transferring phosphorus-containing groups	39	235	3530	39869	0.00011	0.0069	// MD00G1176400 // MD15G1329500 // MD08G1112700 // MD15G1168500 // MD15G1245900 // MD01G1079200 // MD04G1112600 // MD00G1046700 // MD10G1333300 // MD15G1394300 // MD05G1257000 // MD10G1223800 // MD11G1268400 // MD00G1007000 // MD08G1107900 // MD05G1226500 // MD10G1273300 // MD00G1006800 // MD08G1125400 // MD00G1183000 // MD05G1107800 // MD17G1154000 // MD17G1117000 // MD10G1334300 // MD02G1282000…
	GO:0022857	F	transmembrane transporter activity	26	235	1935	39869	9.5e-05	0.0069	// MD03G1181400 // MD15G1139800 // MD11G1041800 // MD13G1024300 // MD14G1133400 // MD17G1222500 // MD10G1305000 // MD17G1049600 // MD07G1184000 // MD16G1027000 // MD08G1141400 // MD13G1071900 // MD08G1048900 // MD13G1087500 // MD13G1014100 // MD05G1344300 // MD12G1259500 // MD08G1140900 // MD04G1243800 // MD13G1014200 // MD05G1039600 // MD08G1041400 // MD10G1045100 // MD16G1240400 // MD07G1292700…
	GO:0004674	F	protein serine/threonine kinase activity	29	235	2372	39869	0.00019	0.0097	// MD08G1112700 // MD15G1168500 // MD04G1112600 // MD00G1046700 // MD10G1333300 // MD15G1394300 // MD05G1257000 // MD10G1223800 // MD11G1268400 // MD00G1007000 // MD08G1107900 // MD05G1226500 // MD10G1273300 // MD08G1125400 // MD00G1183000 // MD17G1117000 // MD10G1334300 // MD00G1006800 // MD00G1024400 // MD00G1024500 // MD10G1307900 // MD13G1052700 // MD05G1261100 // MD05G1180500 // MD10G1334500…
	GO:0016301	F	kinase activity	34	235	3111	39869	0.0004	0.018	// MD00G1176400 // MD08G1112700 // MD15G1168500 // MD04G1112600 // MD00G1046700 // MD10G1333300 // MD15G1394300 // MD05G1257000 // MD10G1223800 // MD11G1268400 // MD00G1007000 // MD08G1107900 // MD05G1226500 // MD10G1273300 // MD00G1006800 // MD08G1125400 // MD00G1183000 // MD05G1107800 // MD17G1154000 // MD17G1117000 // MD10G1334300 // MD02G1282000 // MD00G1024400 // MD00G1024500 // MD10G1307900…
	GO:0004713	F	protein tyrosine kinase activity	15	235	935	39869	0.00054	0.022	// MD05G1257000 // MD10G1334300 // MD00G1006800 // MD00G1024400 // MD00G1007000 // MD05G1180500 // MD05G1226500 // MD10G1334500 // MD00G1024500 // MD10G1307900 // MD05G1261100 // MD00G1046700 // MD10G1333300 // MD00G1183000 // MD10G1333200
	GO:0005524	F	ATP binding	43	235	4401	39869	0.00068	0.023	// MD03G1181400 // MD16G1001800 // MD08G1112700 // MD15G1168500 // MD06G1134600 // MD04G1112600 // MD00G1046700 // MD10G1333300 // MD08G1107900 // MD04G1187700 // MD05G1257000 // MD10G1223800 // MD05G1226500 // MD02G1141700 // MD05G1172700 // MD00G1007000 // MD14G1002500 // MD03G1001300 // MD11G1268400 // MD10G1273300 // MD08G1141400 // MD08G1125400 // MD00G1183000 // MD17G1154000 // MD10G1334300…
	GO:0004672	F	protein kinase activity	30	235	2686	39869	0.00064	0.023	// MD08G1112700 // MD15G1168500 // MD10G1333200 // MD00G1046700 // MD10G1333300 // MD15G1394300 // MD05G1257000 // MD10G1223800 // MD11G1268400 // MD00G1007000 // MD08G1107900 // MD05G1226500 // MD10G1273300 // MD00G1006800 // MD08G1125400 // MD00G1183000 // MD17G1117000 // MD10G1334300 // MD02G1282000 // MD00G1024400 // MD00G1024500 // MD10G1307900 // MD13G1052700 // MD05G1261100 // MD05G1180500…
	GO:0035639	F	purine ribonucleoside triphosphate binding	46	235	4842	39869	0.00077	0.024	// MD02G1178300 // MD03G1181400 // MD16G1001800 // MD08G1112700 // MD15G1168500 // MD06G1134600 // MD04G1112600 // MD00G1046700 // MD10G1333300 // MD10G1334300 // MD08G1107900 // MD04G1187700 // MD05G1257000 // MD10G1223800 // MD05G1226500 // MD02G1141700 // MD05G1172700 // MD00G1007000 // MD14G1002500 // MD03G1001300 // MD11G1268400 // MD10G1273300 // MD08G1141400 // MD08G1125400 // MD00G1183000…
	GO:0017076	F	purine nucleotide binding	50	235	5664	39869	0.0022	0.035	// MD02G1178300 // MD03G1181400 // MD16G1001800 // MD08G1112700 // MD15G1168500 // MD06G1134600 // MD04G1112600 // MD07G1246200 // MD08G1140900 // MD00G1046700 // MD10G1333300 // MD10G1334300 // MD08G1107900 // MD04G1187700 // MD05G1257000 // MD10G1223800 // MD05G1226500 // MD02G1141700 // MD05G1172700 // MD03G1203500 // MD00G1007000 // MD14G1002500 // MD03G1001300 // MD11G1268400 // MD10G1273300…
	GO:0032559	F	adenyl ribonucleotide binding	47	235	5209	39869	0.002	0.035	// MD03G1181400 // MD16G1001800 // MD08G1112700 // MD15G1168500 // MD06G1134600 // MD04G1112600 // MD07G1246200 // MD08G1140900 // MD00G1046700 // MD10G1333300 // MD10G1334300 // MD08G1107900 // MD04G1187700 // MD05G1257000 // MD10G1223800 // MD05G1226500 // MD02G1141700 // MD05G1172700 // MD00G1007000 // MD14G1002500 // MD03G1001300 // MD11G1268400 // MD10G1273300 // MD08G1141400 // MD08G1125400…
	GO:0032555	F	purine ribonucleotide binding	50	235	5647	39869	0.002	0.035	// MD02G1178300 // MD03G1181400 // MD16G1001800 // MD08G1112700 // MD15G1168500 // MD06G1134600 // MD04G1112600 // MD07G1246200 // MD08G1140900 // MD00G1046700 // MD10G1333300 // MD10G1334300 // MD08G1107900 // MD04G1187700 // MD05G1257000 // MD10G1223800 // MD05G1226500 // MD02G1141700 // MD05G1172700 // MD03G1203500 // MD00G1007000 // MD14G1002500 // MD03G1001300 // MD11G1268400 // MD10G1273300…
	GO:0032553	F	ribonucleotide binding	51	235	5710	39869	0.0015	0.035	// MD02G1178300 // MD03G1181400 // MD16G1001800 // MD08G1112700 // MD15G1168500 // MD06G1134600 // MD04G1112600 // MD07G1246200 // MD08G1140900 // MD00G1046700 // MD10G1333300 // MD10G1334300 // MD08G1107900 // MD04G1187700 // MD05G1257000 // MD10G1223800 // MD05G1226500 // MD02G1141700 // MD05G1172700 // MD03G1203500 // MD00G1007000 // MD14G1002500 // MD03G1001300 // MD11G1268400 // MD10G1273300…
	GO:0001882	F	nucleoside binding	50	235	5660	39869	0.0021	0.035	// MD02G1178300 // MD03G1181400 // MD16G1001800 // MD08G1112700 // MD15G1168500 // MD06G1134600 // MD04G1112600 // MD07G1246200 // MD08G1140900 // MD00G1046700 // MD10G1333300 // MD10G1334300 // MD08G1107900 // MD04G1187700 // MD05G1257000 // MD10G1223800 // MD05G1226500 // MD02G1141700 // MD05G1172700 // MD03G1203500 // MD00G1007000 // MD14G1002500 // MD03G1001300 // MD11G1268400 // MD10G1273300…
	GO:0030554	F	adenyl nucleotide binding	47	235	5215	39869	0.002	0.035	// MD03G1181400 // MD16G1001800 // MD08G1112700 // MD15G1168500 // MD06G1134600 // MD04G1112600 // MD07G1246200 // MD08G1140900 // MD00G1046700 // MD10G1333300 // MD10G1334300 // MD08G1107900 // MD04G1187700 // MD05G1257000 // MD10G1223800 // MD05G1226500 // MD02G1141700 // MD05G1172700 // MD00G1007000 // MD14G1002500 // MD03G1001300 // MD11G1268400 // MD10G1273300 // MD08G1141400 // MD08G1125400…
	GO:0032550	F	purine ribonucleoside binding	50	235	5643	39869	0.002	0.035	// MD02G1178300 // MD03G1181400 // MD16G1001800 // MD08G1112700 // MD15G1168500 // MD06G1134600 // MD04G1112600 // MD07G1246200 // MD08G1140900 // MD00G1046700 // MD10G1333300 // MD10G1334300 // MD08G1107900 // MD04G1187700 // MD05G1257000 // MD10G1223800 // MD05G1226500 // MD02G1141700 // MD05G1172700 // MD03G1203500 // MD00G1007000 // MD14G1002500 // MD03G1001300 // MD11G1268400 // MD10G1273300…
	GO:0001883	F	purine nucleoside binding	50	235	5643	39869	0.002	0.035	// MD02G1178300 // MD03G1181400 // MD16G1001800 // MD08G1112700 // MD15G1168500 // MD06G1134600 // MD04G1112600 // MD07G1246200 // MD08G1140900 // MD00G1046700 // MD10G1333300 // MD10G1334300 // MD08G1107900 // MD04G1187700 // MD05G1257000 // MD10G1223800 // MD05G1226500 // MD02G1141700 // MD05G1172700 // MD03G1203500 // MD00G1007000 // MD14G1002500 // MD03G1001300 // MD11G1268400 // MD10G1273300…
	GO:0097367	F	carbohydrate derivative binding	51	235	5785	39869	0.002	0.035	// MD02G1178300 // MD03G1181400 // MD16G1001800 // MD08G1112700 // MD15G1168500 // MD06G1134600 // MD04G1112600 // MD07G1246200 // MD08G1140900 // MD00G1046700 // MD10G1333300 // MD10G1334300 // MD08G1107900 // MD04G1187700 // MD05G1257000 // MD10G1223800 // MD05G1226500 // MD02G1141700 // MD05G1172700 // MD03G1203500 // MD00G1007000 // MD14G1002500 // MD03G1001300 // MD11G1268400 // MD10G1273300…
	GO:0032549	F	ribonucleoside binding	50	235	5656	39869	0.0021	0.035	// MD02G1178300 // MD03G1181400 // MD16G1001800 // MD08G1112700 // MD15G1168500 // MD06G1134600 // MD04G1112600 // MD07G1246200 // MD08G1140900 // MD00G1046700 // MD10G1333300 // MD10G1334300 // MD08G1107900 // MD04G1187700 // MD05G1257000 // MD10G1223800 // MD05G1226500 // MD02G1141700 // MD05G1172700 // MD03G1203500 // MD00G1007000 // MD14G1002500 // MD03G1001300 // MD11G1268400 // MD10G1273300…
	GO:0022804	F	active transmembrane transporter activity	15	235	1082	39869	0.0022	0.035	// MD13G1014200 // MD13G1024300 // MD03G1181400 // MD15G1139800 // MD05G1039600 // MD17G1049600 // MD13G1014100 // MD05G1344300 // MD12G1259500 // MD16G1027000 // MD08G1141400 // MD08G1140900 // MD10G1045100 // MD04G1243800 // MD08G1001300
	GO:0015291	F	secondary active transmembrane transporter activity	10	235	592	39869	0.0031	0.048	// MD13G1014200 // MD13G1024300 // MD15G1139800 // MD05G1039600 // MD13G1014100 // MD05G1344300 // MD12G1259500 // MD16G1027000 // MD10G1045100 // MD04G1243800
	GO:0005886	C	plasma membrane	68	235	6192	39869	1.6e-07	4.4e-05	// MD03G1181400 // MD08G1112700 // MD15G1168500 // MD11G1041800 // MD14G1236300 // MD14G1133400 // MD08G1022400 // MD17G1222500 // MD04G1112600 // MD00G1089600 // MD08G1066400 // MD10G1333300 // MD00G1046700 // MD10G1334300 // MD08G1107900 // MD10G1305000 // MD05G1257000 // MD10G1223800 // MD02G1141700 // MD10G1196300 // MD14G1090900 // MD00G1007000 // MD06G1128500 // MD04G1243400 // MD05G1226500…
	GO:0071944	C	cell periphery	72	235	7527	39869	1.1e-05	0.0015	// MD03G1181400 // MD08G1112700 // MD15G1168500 // MD11G1041800 // MD14G1236300 // MD14G1133400 // MD08G1022400 // MD17G1222500 // MD04G1112600 // MD00G1089600 // MD08G1066400 // MD10G1333300 // MD00G1046700 // MD10G1334300 // MD08G1107900 // MD04G1187700 // MD05G1257000 // MD10G1223800 // MD07G1299200 // MD02G1141700 // MD10G1196300 // MD14G1090900 // MD00G1007000 // MD11G1024000 // MD04G1243400…
	C3
	GO_acc	term_type	Term	queryitem	querytotal	bgitem	bgtotal	pvalue	FDR	entries
	GO:1901700	P	response to oxygen-containing compound	106	438	4834	39869	3.4e-12	1.6e-08	// MD17G1045300 // MD15G1253900 // MD13G1285100 // MD00G1061700 // MD02G1025600 // MD13G1081900 // MD17G1239600 // MD14G1079900 // MD07G1135000 // MD09G1276300 // MD15G1024100 // MD13G1210400 // MD03G1144400 // MD17G1148400 // MD05G1337400 // MD12G1190700 // MD08G1101700 // MD03G1021800 // MD16G1063300 // MD02G1026200 // MD06G1134100 // MD01G1213100 // MD15G1287300 // MD17G1107200 // MD13G1070200…
	GO:0009628	P	response to abiotic stimulus	115	438	5856	39869	2.9e-10	6.7e-07	// MD17G1045300 // MD13G1189100 // MD15G1253900 // MD15G1373900 // MD00G1061700 // MD07G1187400 // MD13G1081900 // MD14G1151700 // MD17G1239600 // MD14G1079900 // MD07G1135000 // MD15G1024100 // MD13G1074300 // MD13G1210400 // MD16G1029400 // MD17G1148400 // MD06G1054800 // MD12G1190700 // MD14G1070300 // MD13G1086700 // MD13G1285100 // MD01G1174400 // MD02G1026200 // MD06G1134100 // MD02G1025600…
	GO:0050896	P	response to stimulus	215	438	13924	39869	1e-09	1.6e-06	// MD17G1045300 // MD15G1253900 // MD08G1037600 // MD03G1059200 // MD08G1031300 // MD14G1177900 // MD08G1011700 // MD06G1195100 // MD00G1061700 // MD07G1187400 // MD13G1081900 // MD16G1230600 // MD14G1151700 // MD17G1239600 // MD13G1071600 // MD14G1079900 // MD07G1135000 // MD04G1018400 // MD13G1108500 // MD09G1276300 // MD03G1231800 // MD15G1024100 // MD13G1042700 // MD13G1074300 // MD13G1210400…
	GO:0042221	P	response to chemical	134	438	7610	39869	6.7e-09	7.8e-06	// MD17G1045300 // MD15G1253900 // MD08G1037600 // MD08G1031300 // MD06G1195100 // MD00G1061700 // MD02G1025600 // MD13G1081900 // MD02G1180400 // MD17G1239600 // MD14G1079900 // MD07G1135000 // MD09G1276300 // MD15G1024100 // MD13G1042700 // MD13G1210400 // MD16G1029400 // MD17G1148400 // MD06G1054800 // MD05G1337400 // MD12G1190700 // MD08G1101700 // MD03G1021800 // MD13G1285100 // MD13G1189100…
	GO:0001101	P	response to acid chemical	65	438	2915	39869	6.5e-08	6e-05	// MD07G1153200 // MD17G1045300 // MD04G1173600 // MD15G1253900 // MD17G1107200 // MD07G1216200 // MD13G1285100 // MD00G1061700 // MD13G1070200 // MD12G1099800 // MD13G1081900 // MD02G1128300 // MD17G1081000 // MD04G1204600 // MD06G1118700 // MD07G1291000 // MD14G1079900 // MD17G1239600 // MD03G1022000 // MD14G1223600 // MD12G1199000 // MD14G1080000 // MD06G1195100 // MD17G1167100 // MD04G1204500…
	GO:0009409	P	response to cold	36	438	1239	39869	2.4e-07	0.00018	// MD04G1173600 // MD07G1203100 // MD00G1061700 // MD07G1187400 // MD11G1192000 // MD07G1216200 // MD02G1025500 // MD17G1239600 // MD10G1292500 // MD14G1079900 // MD05G1055300 // MD14G1080000 // MD07G1291000 // MD04G1058200 // MD02G1130700 // MD12G1187100 // MD06G1008700 // MD01G1213300 // MD01G1185500 // MD07G1003900 // MD08G1046600 // MD01G1029100 // MD15G1216500 // MD16G1064200 // MD03G1211200…
	GO:0009416	P	response to light stimulus	56	438	2501	39869	5.2e-07	0.0003	// MD15G1353800 // MD07G1153200 // MD01G1063400 // MD06G1134100 // MD15G1373900 // MD00G1061700 // MD07G1187400 // MD13G1081900 // MD17G1081000 // MD02G1025500 // MD14G1151700 // MD06G1160900 // MD04G1137400 // MD15G1215500 // MD07G1298000 // MD01G1073600 // MD17G1201600 // MD06G1195100 // MD17G1167100 // MD13G1108500 // MD15G1024100 // MD13G1074300 // MD13G1285100 // MD03G1066000 // MD13G1042400…
	GO:0009725	P	response to hormone	67	438	3220	39869	4.7e-07	0.0003	// MD04G1173600 // MD17G1107200 // MD07G1216200 // MD06G1195100 // MD06G1125700 // MD00G1061700 // MD13G1070200 // MD12G1099800 // MD13G1081900 // MD14G1223700 // MD17G1081000 // MD06G1054800 // MD04G1204600 // MD13G1209700 // MD07G1291000 // MD15G1215500 // MD14G1079900 // MD17G1239600 // MD15G1234400 // MD14G1223600 // MD12G1199000 // MD14G1080000 // MD01G1177200 // MD17G1167100 // MD04G1204500…
	GO:0009266	P	response to temperature stimulus	48	438	2020	39869	7.4e-07	0.00038	// MD04G1173600 // MD01G1063400 // MD07G1203100 // MD07G1182500 // MD00G1061700 // MD07G1187400 // MD11G1192000 // MD10G1300700 // MD07G1216200 // MD02G1025500 // MD08G1046600 // MD17G1239600 // MD10G1292500 // MD14G1079900 // MD07G1135000 // MD01G1073600 // MD14G1080000 // MD07G1291000 // MD13G1108500 // MD04G1058200 // MD02G1130700 // MD12G1187100 // MD06G1008700 // MD01G1213300 // MD12G1190700…
	GO:0009719	P	response to endogenous stimulus	72	438	3637	39869	1e-06	0.00047	// MD07G1198700 // MD04G1173600 // MD17G1107200 // MD07G1216200 // MD06G1195100 // MD06G1125700 // MD00G1061700 // MD13G1070200 // MD12G1099800 // MD13G1081900 // MD14G1223700 // MD17G1081000 // MD06G1054800 // MD04G1204600 // MD13G1209700 // MD07G1291000 // MD15G1215500 // MD14G1079900 // MD17G1239600 // MD15G1234400 // MD14G1223600 // MD12G1199000 // MD14G1080000 // MD01G1177200 // MD17G1167100…
	GO:0006950	P	response to stress	140	438	8873	39869	2.1e-06	0.0008	// MD17G1045300 // MD13G1189100 // MD03G1059200 // MD14G1177900 // MD15G1373900 // MD00G1061700 // MD07G1187400 // MD13G1081900 // MD02G1180400 // MD17G1239600 // MD13G1071600 // MD14G1079900 // MD07G1135000 // MD13G1108500 // MD03G1231800 // MD13G1210400 // MD02G1099000 // MD03G1144400 // MD17G1148400 // MD05G1337400 // MD12G1190700 // MD14G1070300 // MD03G1021800 // MD13G1285100 // MD09G1061000…
	GO:1901605	P	alpha-amino acid metabolic process	30	438	1021	39869	2e-06	0.0008	// MD06G1131600 // MD09G1071400 // MD02G1300300 // MD14G1177900 // MD05G1143000 // MD11G1192000 // MD07G1216200 // MD14G1151700 // MD17G1239600 // MD06G1118700 // MD06G1160900 // MD02G1099800 // MD07G1135000 // MD12G1136700 // MD09G1276300 // MD01G1140200 // MD17G1143900 // MD13G1042400 // MD17G1148400 // MD03G1198900 // MD05G1055300 // MD17G1066700 // MD02G1127400 // MD14G1242700 // MD10G1123500…
	GO:0009314	P	response to radiation	56	438	2656	39869	3.2e-06	0.0011	// MD15G1353800 // MD07G1153200 // MD01G1063400 // MD06G1134100 // MD15G1373900 // MD00G1061700 // MD07G1187400 // MD13G1081900 // MD17G1081000 // MD02G1025500 // MD14G1151700 // MD06G1160900 // MD04G1137400 // MD15G1215500 // MD07G1298000 // MD01G1073600 // MD17G1201600 // MD06G1195100 // MD17G1167100 // MD13G1108500 // MD15G1024100 // MD13G1074300 // MD13G1285100 // MD03G1066000 // MD13G1042400…
	GO:0009611	P	response to wounding	26	438	835	39869	3.6e-06	0.0012	// MD09G1071400 // MD08G1186700 // MD13G1285100 // MD12G1099800 // MD07G1216200 // MD04G1204600 // MD13G1071600 // MD07G1291000 // MD06G1103400 // MD15G1234400 // MD17G1167100 // MD04G1204500 // MD05G1055300 // MD01G1213300 // MD09G1184000 // MD07G1153200 // MD00G1037100 // MD12G1218200 // MD07G1003900 // MD15G1372600 // MD15G1170100 // MD03G1240600 // MD02G1105900 // MD01G1213100 // MD02G1045800…
	GO:0010035	P	response to inorganic substance	58	438	2884	39869	8.4e-06	0.0026	// MD04G1173600 // MD01G1063400 // MD15G1253900 // MD17G1107200 // MD08G1086800 // MD07G1216200 // MD05G1143000 // MD13G1081900 // MD02G1128300 // MD02G1180400 // MD17G1239600 // MD06G1118700 // MD10G1292500 // MD09G1217300 // MD07G1135000 // MD15G1234400 // MD01G1073600 // MD14G1223600 // MD09G1276300 // MD14G1223700 // MD07G1291000 // MD13G1108500 // MD13G1042700 // MD01G1140200 // MD13G1210400…
	GO:0080167	P	response to karrikin	14	438	296	39869	9.1e-06	0.0026	// MD00G1165100 // MD14G1070200 // MD05G1055300 // MD15G1353800 // MD02G1026200 // MD14G1070300 // MD06G1134100 // MD01G1237600 // MD02G1026300 // MD02G1025600 // MD13G1081900 // MD08G1046600 // MD02G1025500 // MD15G1136400
	GO:0010033	P	response to organic substance	94	438	5516	39869	1e-05	0.0028	// MD17G1045300 // MD14G1080000 // MD06G1195100 // MD00G1061700 // MD02G1025600 // MD13G1081900 // MD17G1239600 // MD14G1079900 // MD07G1135000 // MD15G1024100 // MD13G1210400 // MD03G1144400 // MD06G1054800 // MD08G1101700 // MD03G1021800 // MD13G1285100 // MD13G1189100 // MD02G1026200 // MD06G1134100 // MD17G1030100 // MD15G1287300 // MD17G1107200 // MD13G1070200 // MD17G1081000 // MD02G1025500…
	GO:0009744	P	response to sucrose	17	438	439	39869	1.3e-05	0.0033	// MD15G1215500 // MD15G1353800 // MD02G1026200 // MD06G1134100 // MD01G1237600 // MD02G1025600 // MD02G1026300 // MD13G1285100 // MD11G1019200 // MD15G1024100 // MD08G1028600 // MD03G1066000 // MD14G1238700 // MD01G1124500 // MD02G1025500 // MD13G1042400 // MD11G1070800
	GO:0034285	P	response to disaccharide	17	438	443	39869	1.5e-05	0.0035	// MD15G1215500 // MD15G1353800 // MD02G1026200 // MD06G1134100 // MD01G1237600 // MD02G1025600 // MD02G1026300 // MD13G1285100 // MD11G1019200 // MD15G1024100 // MD08G1028600 // MD03G1066000 // MD14G1238700 // MD01G1124500 // MD02G1025500 // MD13G1042400 // MD11G1070800
	GO:1901565	P	organonitrogen compound catabolic process	21	438	649	39869	1.8e-05	0.0041	// MD17G1148400 // MD09G1071400 // MD05G1055300 // MD02G1137500 // MD01G1174400 // MD05G1321500 // MD06G1118700 // MD14G1242700 // MD14G1177900 // MD09G1184000 // MD13G1042400 // MD03G1259100 // MD10G1120200 // MD03G1066000 // MD07G1003900 // MD07G1216200 // MD02G1069500 // MD07G1153200 // MD17G1143900 // MD06G1160900 // MD11G1070800
	GO:0009415	P	response to water	25	438	875	39869	2.2e-05	0.0049	// MD04G1173600 // MD15G1253900 // MD17G1107200 // MD07G1216200 // MD13G1081900 // MD02G1128300 // MD06G1118700 // MD05G1055300 // MD14G1223600 // MD14G1223700 // MD07G1291000 // MD09G1217300 // MD13G1210400 // MD12G1187100 // MD01G1213300 // MD17G1030100 // MD01G1140200 // MD07G1003900 // MD01G1029100 // MD15G1153500 // MD13G1189100 // MD16G1063300 // MD01G1213100 // MD12G1057800 // MD15G1098800
	GO:0006970	P	response to osmotic stress	41	438	1857	39869	2.7e-05	0.0056	// MD04G1173600 // MD17G1107200 // MD07G1216200 // MD04G1064200 // MD01G1086800 // MD13G1081900 // MD02G1128300 // MD17G1081000 // MD17G1239600 // MD03G1171500 // MD07G1135000 // MD11G1189000 // MD07G1291000 // MD01G1140200 // MD13G1210400 // MD03G1238700 // MD12G1187100 // MD16G1029400 // MD01G1213300 // MD12G1190700 // MD09G1217300 // MD01G1185500 // MD05G1055300 // MD17G1209200 // MD01G1174400…
	GO:0009414	P	response to water deprivation	24	438	865	39869	5.1e-05	0.01	// MD04G1173600 // MD17G1107200 // MD07G1216200 // MD13G1081900 // MD02G1128300 // MD06G1118700 // MD05G1055300 // MD14G1223600 // MD14G1223700 // MD07G1291000 // MD09G1217300 // MD13G1210400 // MD12G1187100 // MD01G1213300 // MD17G1030100 // MD01G1140200 // MD07G1003900 // MD01G1029100 // MD15G1153500 // MD13G1189100 // MD16G1063300 // MD01G1213100 // MD12G1057800 // MD15G1098800
	GO:0009753	P	response to jasmonic acid	27	438	1043	39869	5.5e-05	0.011	// MD13G1285100 // MD12G1099800 // MD07G1216200 // MD04G1204600 // MD07G1291000 // MD14G1079900 // MD17G1239600 // MD03G1022000 // MD14G1080000 // MD17G1167100 // MD04G1204500 // MD03G1231800 // MD09G1217300 // MD13G1210400 // MD05G1055300 // MD16G1029400 // MD03G1021800 // MD09G1184000 // MD03G1259100 // MD12G1218200 // MD07G1003900 // MD15G1170100 // MD04G1059200 // MD02G1105900 // MD12G1147300…
	GO:0009812	P	flavonoid metabolic process	19	438	612	39869	7.6e-05	0.013	// MD15G1215500 // MD06G1134100 // MD04G1060700 // MD06G1103400 // MD02G1105900 // MD12G1198900 // MD12G1199000 // MD09G1255700 // MD01G1237600 // MD05G1335600 // MD04G1185100 // MD13G1285100 // MD11G1019200 // MD15G1024100 // MD08G1028600 // MD15G1353800 // MD14G1215700 // MD17G1143900 // MD13G1071600
	GO:0009651	P	response to salt stress	38	438	1751	39869	7.5e-05	0.013	// MD04G1173600 // MD17G1107200 // MD04G1064200 // MD01G1086800 // MD13G1081900 // MD07G1216200 // MD17G1081000 // MD17G1239600 // MD03G1171500 // MD07G1135000 // MD11G1189000 // MD07G1291000 // MD01G1140200 // MD13G1210400 // MD03G1238700 // MD05G1055300 // MD16G1029400 // MD01G1213300 // MD12G1190700 // MD09G1217300 // MD01G1185500 // MD06G1103400 // MD17G1209200 // MD01G1174400 // MD01G1029100…
	GO:0009069	P	serine family amino acid metabolic process	17	438	516	39869	9e-05	0.015	// MD17G1148400 // MD06G1131600 // MD07G1135000 // MD15G1360000 // MD02G1127400 // MD02G1300300 // MD10G1123500 // MD03G1198900 // MD13G1042400 // MD05G1143000 // MD02G1099800 // MD07G1003900 // MD11G1192000 // MD14G1151700 // MD17G1239600 // MD17G1143900 // MD06G1160900
	GO:1902532	P	negative regulation of intracellular signal transduction	6	438	61	39869	9.1e-05	0.015	// MD17G1106400 // MD17G1107200 // MD03G1292200 // MD03G1231800 // MD09G1115100 // MD13G1209700
	GO:0046283	P	anthocyanin-containing compound metabolic process	10	438	200	39869	0.00011	0.018	// MD15G1353800 // MD12G1199000 // MD06G1134100 // MD04G1185100 // MD13G1285100 // MD12G1198900 // MD15G1024100 // MD08G1028600 // MD14G1215700 // MD13G1071600
	GO:0006979	P	response to oxidative stress	28	438	1165	39869	0.00014	0.021	// MD01G1063400 // MD03G1059200 // MD15G1373900 // MD06G1125700 // MD02G1025600 // MD02G1069500 // MD02G1025500 // MD06G1160900 // MD04G1137400 // MD07G1298000 // MD01G1073600 // MD13G1108500 // MD01G1162100 // MD01G1140200 // MD13G1285100 // MD17G1148400 // MD14G1070200 // MD12G1190700 // MD14G1070300 // MD09G1217300 // MD05G1055300 // MD13G1230800 // MD15G1067100 // MD01G1162700 // MD15G1170100…
	GO:0033993	P	response to lipid	36	438	1688	39869	0.00016	0.024	// MD04G1173600 // MD17G1107200 // MD00G1061700 // MD13G1070200 // MD07G1216200 // MD17G1081000 // MD04G1204600 // MD07G1291000 // MD05G1055300 // MD14G1223600 // MD06G1195100 // MD14G1223700 // MD04G1204500 // MD03G1231800 // MD01G1140200 // MD13G1210400 // MD15G1059100 // MD12G1187100 // MD16G1029400 // MD08G1101700 // MD09G1217300 // MD04G1185100 // MD01G1185500 // MD12G1198900 // MD12G1218200…
	GO:0009737	P	response to abscisic acid	29	438	1255	39869	0.0002	0.028	// MD04G1173600 // MD17G1107200 // MD00G1061700 // MD07G1216200 // MD17G1081000 // MD04G1204600 // MD07G1291000 // MD05G1055300 // MD14G1223600 // MD14G1223700 // MD04G1204500 // MD03G1231800 // MD09G1217300 // MD13G1210400 // MD15G1059100 // MD12G1187100 // MD16G1029400 // MD08G1101700 // MD01G1140200 // MD01G1185500 // MD12G1218200 // MD17G1209200 // MD16G1064200 // MD13G1033600 // MD13G1189100…
	GO:0097305	P	response to alcohol	29	438	1257	39869	0.0002	0.028	// MD04G1173600 // MD17G1107200 // MD00G1061700 // MD07G1216200 // MD17G1081000 // MD04G1204600 // MD07G1291000 // MD05G1055300 // MD14G1223600 // MD14G1223700 // MD04G1204500 // MD03G1231800 // MD09G1217300 // MD13G1210400 // MD15G1059100 // MD12G1187100 // MD16G1029400 // MD08G1101700 // MD01G1140200 // MD01G1185500 // MD12G1218200 // MD17G1209200 // MD16G1064200 // MD13G1033600 // MD13G1189100…
	GO:0044550	P	secondary metabolite biosynthetic process	20	438	721	39869	0.00021	0.029	// MD02G1099800 // MD07G1135000 // MD15G1348900 // MD08G1186700 // MD11G1079600 // MD01G1237600 // MD06G1103400 // MD10G1123500 // MD00G1037100 // MD09G1184000 // MD03G1198900 // MD07G1216200 // MD11G1192000 // MD15G1372600 // MD13G1285100 // MD07G1153200 // MD17G1239600 // MD03G1073600 // MD04G1147700 // MD07G1308000
	GO:0071489	P	cellular response to red or far red light	6	438	76	39869	0.00028	0.037	// MD06G1054800 // MD07G1182500 // MD06G1134100 // MD04G1185100 // MD12G1198900 // MD12G1199000
	GO:0009617	P	response to bacterium	30	438	1348	39869	0.00029	0.037	// MD07G1203100 // MD08G1031300 // MD14G1177900 // MD04G1064200 // MD07G1216200 // MD02G1180400 // MD04G1204600 // MD08G1217600 // MD10G1292500 // MD14G1079900 // MD17G1239600 // MD03G1022000 // MD14G1080000 // MD04G1204500 // MD03G1231800 // MD09G1217300 // MD17G1143900 // MD13G1042400 // MD03G1021800 // MD03G1259100 // MD12G1218200 // MD07G1003900 // MD04G1225400 // MD15G1216500 // MD16G1064200…
	GO:0042742	P	defense response to bacterium	23	438	922	39869	0.00032	0.04	// MD07G1203100 // MD14G1177900 // MD04G1064200 // MD07G1216200 // MD02G1180400 // MD04G1204600 // MD10G1292500 // MD14G1079900 // MD17G1239600 // MD14G1080000 // MD04G1204500 // MD03G1231800 // MD09G1217300 // MD17G1143900 // MD13G1042400 // MD03G1259100 // MD12G1218200 // MD04G1225400 // MD15G1216500 // MD04G1064400 // MD16G1063300 // MD15G1216400 // MD12G1147300
	GO:0009605	P	response to external stimulus	76	438	4662	39869	0.00034	0.04	// MD17G1250000 // MD17G1045300 // MD03G1259100 // MD17G1212300 // MD07G1203100 // MD08G1186700 // MD14G1177900 // MD08G1011700 // MD04G1064200 // MD12G1099800 // MD10G1300700 // MD07G1216200 // MD09G1256300 // MD02G1180400 // MD04G1204600 // MD06G1118700 // MD13G1071600 // MD08G1217600 // MD10G1292500 // MD14G1079900 // MD03G1171500 // MD17G1239600 // MD15G1234400 // MD01G1073600 // MD11G1189000…
	GO:1901607	P	alpha-amino acid biosynthetic process	20	438	749	39869	0.00034	0.04	// MD17G1148400 // MD06G1131600 // MD07G1135000 // MD12G1136700 // MD07G1216200 // MD14G1177900 // MD03G1198900 // MD05G1143000 // MD02G1099800 // MD17G1066700 // MD11G1192000 // MD06G1079300 // MD01G1140200 // MD02G1300300 // MD03G1066000 // MD14G1151700 // MD17G1239600 // MD17G1143900 // MD02G1127400 // MD11G1070800
	GO:0071214	P	cellular response to abiotic stimulus	12	438	325	39869	0.00036	0.042	// MD01G1213300 // MD06G1054800 // MD12G1198900 // MD07G1182500 // MD05G1106800 // MD06G1134100 // MD04G1185100 // MD01G1213100 // MD03G1238700 // MD12G1199000 // MD06G1118700 // MD02G1127400
	GO:0009698	P	phenylpropanoid metabolic process	16	438	533	39869	0.00039	0.043	// MD06G1103400 // MD02G1137500 // MD01G1174400 // MD11G1079600 // MD08G1186700 // MD12G1194700 // MD01G1237600 // MD09G1184000 // MD07G1153200 // MD00G1037100 // MD03G1073600 // MD07G1308000 // MD15G1372600 // MD13G1285100 // MD04G1142600 // MD04G1147700
	GO:0044699	P	single-organism process	262	438	20599	39869	0.00039	0.043	// MD17G1045300 // MD01G1207200 // MD03G1059200 // MD08G1102600 // MD05G1168200 // MD02G1316800 // MD07G1284200 // MD03G1240600 // MD06G1195100 // MD00G1061700 // MD07G1187400 // MD13G1081900 // MD16G1230600 // MD14G1151700 // MD17G1239600 // MD07G1169900 // MD13G1071600 // MD08G1095300 // MD14G1079900 // MD02G1099800 // MD15G1348800 // MD09G1276300 // MD08G1037600 // MD11G1244800 // MD03G1231800…
	GO:0042440	P	pigment metabolic process	21	438	826	39869	0.00046	0.049	// MD17G1148400 // MD03G1288700 // MD02G1099800 // MD15G1353800 // MD07G1203100 // MD03G1259100 // MD15G1373900 // MD12G1199000 // MD06G1134100 // MD04G1185100 // MD13G1042400 // MD12G1198900 // MD15G1024100 // MD08G1028600 // MD07G1003900 // MD14G1147900 // MD13G1285100 // MD02G1069500 // MD14G1151700 // MD14G1215700 // MD13G1071600
	GO:0004553	F	hydrolase activity, hydrolyzing O-glycosyl compounds	39	438	680	39869	2.6e-16	1.5e-13	// MD06G1131600 // MD15G1348900 // MD17G1104000 // MD15G1206800 // MD14G1080000 // MD02G1025600 // MD05G1099400 // MD02G1025500 // MD03G1069500 // MD14G1079900 // MD03G1171500 // MD15G1234400 // MD01G1213100 // MD11G1189000 // MD01G1188500 // MD08G1101700 // MD13G1042700 // MD12G1089500 // MD06G1229100 // MD03G1144400 // MD06G1105900 // MD14G1070200 // MD01G1213300 // MD02G1137500 // MD05G1321500…
	GO:0016798	F	hydrolase activity, acting on glycosyl bonds	39	438	724	39869	1.8e-15	5.4e-13	// MD06G1131600 // MD15G1348900 // MD17G1104000 // MD15G1206800 // MD14G1080000 // MD02G1025600 // MD05G1099400 // MD02G1025500 // MD03G1069500 // MD14G1079900 // MD03G1171500 // MD15G1234400 // MD01G1213100 // MD11G1189000 // MD01G1188500 // MD08G1101700 // MD13G1042700 // MD12G1089500 // MD06G1229100 // MD03G1144400 // MD06G1105900 // MD14G1070200 // MD01G1213300 // MD02G1137500 // MD05G1321500…
	GO:0003824	F	catalytic activity	225	438	15963	39869	1.2e-06	0.00024	// MD00G1165100 // MD17G1045300 // MD01G1207200 // MD03G1059200 // MD14G1080000 // MD14G1177900 // MD15G1373900 // MD00G1061700 // MD07G1187400 // MD08G1050700 // MD14G1151700 // MD17G1239600 // MD13G1071600 // MD14G1079900 // MD02G1099800 // MD15G1348800 // MD09G1276300 // MD02G1175500 // MD11G1244800 // MD05G1363600 // MD15G1024100 // MD09G1098900 // MD13G1042700 // MD13G1210400 // MD06G1229100…
	GO:0016787	F	hydrolase activity	91	438	5293	39869	1.1e-05	0.0012	// MD17G1045300 // MD01G1188500 // MD00G1061700 // MD02G1025600 // MD08G1050700 // MD17G1239600 // MD13G1071600 // MD14G1079900 // MD15G1084200 // MD15G1348800 // MD13G1042700 // MD06G1229100 // MD03G1144400 // MD14G1070300 // MD15G1383700 // MD08G1028100 // MD11G1313400 // MD02G1026200 // MD11G1133400 // MD01G1213100 // MD16G1043700 // MD08G1098100 // MD16G1165100 // MD06G1131600 // MD16G1165000…
	GO:0015925	F	galactosidase activity	7	438	61	39869	9.3e-06	0.0012	// MD14G1070200 // MD02G1137500 // MD05G1321500 // MD14G1070300 // MD11G1133400 // MD15G1136400 // MD15G1206800
	GO:0016165	F	linoleate 13S-lipoxygenase activity	5	438	31	39869	4.2e-05	0.0041	// MD04G1204600 // MD04G1204500 // MD12G1218200 // MD07G1003900 // MD17G1167100
	GO:0016702	F	oxidoreductase activity, acting on single donors with incorporation of molecular oxygen, incorporation of two atoms of oxygen	6	438	73	39869	0.00023	0.019	// MD17G1167100 // MD04G1204500 // MD12G1218200 // MD07G1003900 // MD04G1204600 // MD17G1048300
	GO:0005576	C	extracellular region	89	438	3923	39869	5.5e-11	2.2e-08	// MD01G1207200 // MD03G1059200 // MD01G1188500 // MD08G1011700 // MD07G1187400 // MD08G1050700 // MD14G1151700 // MD13G1071600 // MD14G1079900 // MD04G1018400 // MD15G1348800 // MD13G1042700 // MD03G1144400 // MD05G1337400 // MD12G1190700 // MD08G1101700 // MD15G1383700 // MD08G1028100 // MD09G1256000 // MD11G1133400 // MD01G1213100 // MD16G1043700 // MD08G1098100 // MD06G1131600 // MD09G1291500…
	GO:0030312	C	external encapsulating structure	41	438	1471	39869	9.8e-08	1.3e-05	// MD06G1131600 // MD05G1106800 // MD04G1173600 // MD03G1059200 // MD11G1189000 // MD13G1070200 // MD05G1099400 // MD13G1071600 // MD15G1348900 // MD03G1171500 // MD07G1077900 // MD11G1028200 // MD05G1321500 // MD14G1080000 // MD06G1195100 // MD04G1129800 // MD01G1162100 // MD13G1042700 // MD16G1043700 // MD06G1229100 // MD08G1031300 // MD15G1206800 // MD14G1079900 // MD12G1190700 // MD15G1383700…
	GO:0005618	C	cell wall	41	438	1467	39869	9.1e-08	1.3e-05	// MD06G1131600 // MD05G1106800 // MD04G1173600 // MD03G1059200 // MD11G1189000 // MD13G1070200 // MD05G1099400 // MD13G1071600 // MD15G1348900 // MD03G1171500 // MD07G1077900 // MD11G1028200 // MD05G1321500 // MD14G1080000 // MD06G1195100 // MD04G1129800 // MD01G1162100 // MD13G1042700 // MD16G1043700 // MD06G1229100 // MD08G1031300 // MD15G1206800 // MD14G1079900 // MD12G1190700 // MD15G1383700…
	GO:0009505	C	plant-type cell wall	20	438	565	39869	8.2e-06	0.00082	// MD06G1131600 // MD15G1348900 // MD07G1077900 // MD15G1383700 // MD15G1372400 // MD15G1136400 // MD04G1083900 // MD15G1216400 // MD16G1070600 // MD02G1207900 // MD08G1031300 // MD06G1195100 // MD13G1070200 // MD05G1321500 // MD16G1043700 // MD13G1042700 // MD10G1050200 // MD06G1229100 // MD04G1129800 // MD15G1216500
	GO:0048046	C	apoplast	23	438	816	39869	5.8e-05	0.0047	// MD06G1131600 // MD04G1173600 // MD03G1059200 // MD11G1192000 // MD14G1151700 // MD14G1079900 // MD11G1028200 // MD14G1080000 // MD01G1162100 // MD04G1147700 // MD13G1042700 // MD04G1142600 // MD08G1101700 // MD15G1383700 // MD01G1185500 // MD01G1029100 // MD15G1216500 // MD01G1162700 // MD04G1083900 // MD15G1216400 // MD13G1109600 // MD16G1043700 // MD07G1308000
	GO:0009579	C	thylakoid	25	438	952	39869	8.3e-05	0.0056	// MD07G1203100 // MD04G1131700 // MD17G1286800 // MD14G1041200 // MD17G1239600 // MD10G1292500 // MD02G1099800 // MD14G1235200 // MD02G1004100 // MD05G1167400 // MD07G1240700 // MD17G1148400 // MD05G1168200 // MD14G1147900 // MD07G1003900 // MD10G1083200 // MD02G1316800 // MD16G1230600 // MD15G1373900 // MD01G1029100 // MD01G1006600 // MD11G1017400 // MD06G1134100 // MD15G1147800 // MD03G1200900
	GO:0009536	C	plastid	109	438	7046	39869	0.0001	0.006	// MD14G1177900 // MD11G1256900 // MD16G1174800 // MD15G1373900 // MD02G1025600 // MD13G1081900 // MD17G1286800 // MD14G1151700 // MD17G1239600 // MD02G1099800 // MD02G1004100 // MD13G1042700 // MD06G1229100 // MD17G1148400 // MD05G1169600 // MD17G1272400 // MD13G1010600 // MD13G1086700 // MD02G1316800 // MD15G1059100 // MD01G1006600 // MD02G1026200 // MD06G1134100 // MD17G1030100 // MD16G1043700…
	GO:0071944	C	cell periphery	113	438	7527	39869	0.00025	0.012	// MD17G1045300 // MD08G1037600 // MD03G1059200 // MD14G1080000 // MD02G1198700 // MD17G1286800 // MD11G1250400 // MD13G1071600 // MD14G1079900 // MD08G1031300 // MD15G1101800 // MD13G1042700 // MD10G1080000 // MD06G1229100 // MD08G1095100 // MD08G1015000 // MD03G1144400 // MD17G1148400 // MD12G1190700 // MD15G1343900 // MD16G1044000 // MD08G1028100 // MD03G1021800 // MD15G1084100 // MD11G1313400…
	GO:0009507	C	chloroplast	104	438	6896	39869	0.0004	0.015	// MD14G1177900 // MD11G1256900 // MD16G1174800 // MD15G1373900 // MD02G1025600 // MD13G1081900 // MD17G1286800 // MD14G1151700 // MD17G1239600 // MD02G1099800 // MD02G1004100 // MD13G1042700 // MD06G1229100 // MD17G1148400 // MD05G1169600 // MD17G1272400 // MD13G1010600 // MD02G1316800 // MD15G1059100 // MD01G1006600 // MD02G1026200 // MD06G1134100 // MD17G1030100 // MD16G1043700 // MD17G1240700…
	GO:0031976	C	plastid thylakoid	20	438	761	39869	0.00042	0.015	// MD17G1148400 // MD10G1292500 // MD01G1006600 // MD02G1099800 // MD07G1203100 // MD14G1235200 // MD06G1134100 // MD05G1168200 // MD17G1286800 // MD04G1131700 // MD10G1083200 // MD16G1230600 // MD15G1147800 // MD14G1147900 // MD02G1004100 // MD05G1167400 // MD02G1316800 // MD07G1003900 // MD15G1373900 // MD03G1200900
	GO:0009534	C	chloroplast thylakoid	20	438	761	39869	0.00042	0.015	// MD17G1148400 // MD10G1292500 // MD01G1006600 // MD02G1099800 // MD07G1203100 // MD14G1235200 // MD06G1134100 // MD05G1168200 // MD17G1286800 // MD04G1131700 // MD10G1083200 // MD16G1230600 // MD15G1147800 // MD14G1147900 // MD02G1004100 // MD05G1167400 // MD02G1316800 // MD07G1003900 // MD15G1373900 // MD03G1200900
	GO:0044435	C	plastid part	45	438	2427	39869	0.00053	0.018	// MD09G1071400 // MD13G1086700 // MD07G1203100 // MD12G1228800 // MD07G1216200 // MD14G1177900 // MD07G1060000 // MD16G1174800 // MD15G1373900 // MD12G1233500 // MD11G1192000 // MD17G1286800 // MD14G1041200 // MD14G1151700 // MD17G1239600 // MD06G1160900 // MD04G1137400 // MD10G1292500 // MD02G1099800 // MD12G1136700 // MD14G1235200 // MD12G1245900 // MD14G1162400 // MD02G1004100 // MD05G1167400…
	GO:0044434	C	chloroplast part	43	438	2385	39869	0.0012	0.037	// MD09G1071400 // MD07G1203100 // MD12G1228800 // MD07G1216200 // MD14G1177900 // MD07G1060000 // MD16G1174800 // MD15G1373900 // MD12G1233500 // MD11G1192000 // MD17G1286800 // MD14G1041200 // MD14G1151700 // MD17G1239600 // MD06G1160900 // MD04G1137400 // MD10G1292500 // MD02G1099800 // MD12G1136700 // MD14G1235200 // MD12G1245900 // MD14G1162400 // MD02G1004100 // MD05G1167400 // MD05G1168200…
	C4
	GO_acc	term_type	Term	queryitem	querytotal	bgitem	bgtotal	pvalue	FDR	entries
	GO:0009055	F	electron carrier activity	18	276	872	39869	5.2e-05	0.013	// MD05G1266000 // MD13G1118500 // MD16G1059700 // MD00G1175200 // MD13G1080800 // MD15G1032900 // MD06G1166400 // MD14G1214200 // MD09G1011300 // MD17G1100800 // MD16G1116100 // MD15G1140500 // MD00G1037500 // MD17G1167200 // MD09G1235700 // MD14G1113700 // MD06G1093000 // MD04G1066300
	GO:0010333	F	terpene synthase activity	5	276	55	39869	5.9e-05	0.013	// MD12G1163800 // MD12G1163000 // MD12G1163600 // MD07G1269200 // MD10G1310600
	GO:0016838	F	carbon-oxygen lyase activity, acting on phosphates	5	276	64	39869	0.00012	0.016	// MD12G1163800 // MD12G1163000 // MD12G1163600 // MD07G1269200 // MD10G1310600
	GO:0016705	F	oxidoreductase activity, acting on paired donors, with incorporation or reduction of molecular oxygen	16	276	852	39869	0.00038	0.04	// MD04G1066300 // MD13G1118500 // MD16G1059700 // MD00G1175200 // MD15G1032900 // MD14G1214200 // MD15G1098700 // MD03G1085000 // MD17G1100800 // MD16G1116100 // MD03G1070400 // MD00G1037500 // MD17G1167200 // MD12G1168600 // MD12G1103300 // MD17G1212000
	GO:0016835	F	carbon-oxygen lyase activity	8	276	255	39869	0.00051	0.043	// MD12G1163800 // MD17G1034000 // MD12G1163000 // MD02G1043100 // MD07G1269200 // MD10G1310600 // MD12G1163600 // MD12G1024600
	GO:0071944	C	cell periphery	83	276	7527	39869	5.5e-06	0.0017	// MD06G1189500 // MD05G1165400 // MD05G1236300 // MD08G1211100 // MD13G1184800 // MD04G1150400 // MD01G1064600 // MD12G1129500 // MD13G1080800 // MD16G1269600 // MD10G1029800 // MD07G1206700 // MD11G1249400 // MD07G1220100 // MD07G1236800 // MD03G1006600 // MD02G1068200 // MD05G1207800 // MD14G1123400 // MD14G1186800 // MD11G1021300 // MD08G1221800 // MD15G1393900 // MD00G1189100 // MD16G1004100…
	GO:0016020	C	membrane	103	276	10564	39869	5.7e-05	0.0089	// MD06G1189500 // MD04G1150400 // MD10G1029800 // MD11G1249400 // MD07G1220100 // MD17G1000900 // MD13G1218400 // MD11G1021300 // MD15G1010800 // MD16G1193000 // MD15G1390400 // MD12G1038700 // MD06G1195000 // MD15G1244200 // MD15G1351700 // MD09G1271200 // MD11G1074900 // MD11G1160200 // MD09G1254500 // MD08G1211100 // MD05G1351400 // MD02G1275400 // MD08G1210400 // MD12G1174000 // MD15G1140500…
	GO:0030312	C	external encapsulating structure	23	276	1471	39869	0.0003	0.023	// MD05G1236300 // MD13G1184800 // MD01G1064600 // MD14G1186300 // MD16G1269600 // MD07G1206700 // MD02G1068200 // MD14G1123400 // MD14G1186800 // MD08G1221800 // MD00G1189100 // MD02G1043100 // MD11G1217100 // MD04G1028900 // MD16G1091200 // MD11G1182500 // MD14G1186700 // MD07G1206200 // MD14G1139300 // MD12G1028200 // MD09G1270600 // MD14G1185000 // MD15G1285300
	GO:0005618	C	cell wall	23	276	1467	39869	0.00029	0.023	// MD05G1236300 // MD13G1184800 // MD01G1064600 // MD14G1186300 // MD16G1269600 // MD07G1206700 // MD02G1068200 // MD14G1123400 // MD14G1186800 // MD08G1221800 // MD00G1189100 // MD02G1043100 // MD11G1217100 // MD04G1028900 // MD16G1091200 // MD11G1182500 // MD14G1186700 // MD07G1206200 // MD14G1139300 // MD12G1028200 // MD09G1270600 // MD14G1185000 // MD15G1285300
	GO:0009507	C	chloroplast	70	276	6896	39869	0.0005	0.031	// MD15G1365900 // MD00G1175200 // MD11G1204700 // MD05G1320900 // MD15G1264200 // MD14G1214200 // MD10G1310600 // MD15G1391500 // MD02G1168100 // MD00G1037500 // MD12G1129500 // MD12G1168600 // MD15G1148200 // MD17G1010000 // MD09G1011300 // MD07G1278900 // MD13G1218400 // MD13G1118500 // MD13G1049400 // MD09G1032300 // MD03G1252100 // MD12G1163600 // MD07G1043300 // MD00G1165200 // MD02G1043100…
	GO:0009536	C	plastid	70	276	7046	39869	0.0009	0.047	// MD15G1365900 // MD00G1175200 // MD11G1204700 // MD05G1320900 // MD15G1264200 // MD14G1214200 // MD10G1310600 // MD15G1391500 // MD02G1168100 // MD00G1037500 // MD12G1129500 // MD12G1168600 // MD15G1148200 // MD17G1010000 // MD09G1011300 // MD07G1278900 // MD13G1218400 // MD13G1118500 // MD13G1049400 // MD09G1032300 // MD03G1252100 // MD12G1163600 // MD07G1043300 // MD00G1165200 // MD02G1043100…
	C5
	GO_acc	term_type	Term	queryitem	querytotal	bgitem	bgtotal	pvalue	FDR	entries
	GO:0015979	P	photosynthesis	49	451	728	39869	1.8e-22	8.8e-19	// MD05G1072400 // MD15G1214700 // MD03G1042800 // MD15G1428700 // MD05G1215200 // MD08G1236800 // MD11G1236900 // MD14G1202000 // MD17G1113400 // MD12G1238600 // MD08G1070100 // MD05G1336200 // MD15G1307200 // MD11G1227900 // MD15G1083400 // MD12G1165400 // MD14G1153600 // MD00G1109700 // MD02G1095600 // MD13G1053400 // MD00G1103100 // MD10G1051800 // MD09G1035000 // MD03G1161500 // MD17G1079700…
	GO:0019684	P	photosynthesis, light reaction	37	451	555	39869	4.5e-17	1.1e-13	// MD05G1072400 // MD03G1042800 // MD15G1428700 // MD05G1215200 // MD08G1236800 // MD11G1236900 // MD14G1202000 // MD17G1113400 // MD12G1238600 // MD15G1307200 // MD11G1227900 // MD15G1083400 // MD12G1165400 // MD02G1095600 // MD13G1053400 // MD00G1103100 // MD10G1051800 // MD09G1035000 // MD03G1161500 // MD17G1079700 // MD13G1174500 // MD13G1000200 // MD04G1191200 // MD15G1170900 // MD07G1160900…
	GO:0009765	P	photosynthesis, light harvesting	11	451	58	39869	3.1e-10	2.5e-07	// MD17G1079700 // MD15G1083400 // MD00G1103100 // MD14G1202000 // MD09G1292900 // MD11G1236900 // MD12G1165400 // MD08G1220900 // MD05G1000500 // MD02G1095600 // MD17G1113400
	GO:0006091	P	generation of precursor metabolites and energy	44	451	1297	39869	2.6e-10	2.5e-07	// MD05G1072400 // MD03G1004300 // MD13G1180400 // MD03G1042800 // MD15G1428700 // MD05G1215200 // MD08G1236800 // MD11G1236900 // MD14G1202000 // MD08G1006000 // MD17G1113400 // MD12G1238600 // MD13G1053400 // MD15G1307200 // MD07G1228500 // MD15G1083400 // MD04G1186600 // MD12G1165400 // MD14G1153600 // MD02G1095600 // MD06G1225900 // MD00G1103100 // MD10G1051800 // MD09G1035000 // MD03G1161500…
	GO:0009069	P	serine family amino acid metabolic process	27	451	516	39869	1.6e-10	2.5e-07	// MD09G1178400 // MD13G1180400 // MD00G1191600 // MD03G1042800 // MD05G1215200 // MD14G1202000 // MD15G1233400 // MD15G1307200 // MD05G1345800 // MD10G1231600 // MD15G1215200 // MD13G1092200 // MD00G1109700 // MD06G1012300 // MD00G1103100 // MD13G1131200 // MD12G1238600 // MD08G1220900 // MD08G1007200 // MD10G1238800 // MD09G1287900 // MD01G1004300 // MD05G1115700 // MD16G1000400 // MD05G1000500…
	GO:0010114	P	response to red light	17	451	190	39869	2.4e-10	2.5e-07	// MD10G1170600 // MD08G1007200 // MD09G1133900 // MD13G1180400 // MD08G1236800 // MD15G1428700 // MD16G1084400 // MD11G1079700 // MD03G1088100 // MD12G1165400 // MD05G1215200 // MD05G1000500 // MD13G1174500 // MD02G1095600 // MD13G1085200 // MD00G1103100 // MD09G1252100
	GO:0009070	P	serine family amino acid biosynthetic process	23	451	406	39869	8.8e-10	6e-07	// MD09G1178400 // MD13G1180400 // MD03G1042800 // MD05G1215200 // MD14G1202000 // MD15G1233400 // MD05G1345800 // MD00G1191600 // MD15G1215200 // MD00G1109700 // MD06G1012300 // MD00G1103100 // MD13G1131200 // MD12G1238600 // MD08G1220900 // MD08G1007200 // MD10G1238800 // MD01G1004300 // MD05G1115700 // MD16G1000400 // MD05G1000500 // MD15G1006300 // MD05G1063200
	GO:0009746	P	response to hexose	20	451	304	39869	1e-09	6e-07	// MD13G1166800 // MD01G1050900 // MD04G1224400 // MD05G1345800 // MD02G1122400 // MD11G1108700 // MD16G1100500 // MD10G1231600 // MD13G1180400 // MD05G1254200 // MD00G1191600 // MD17G1229500 // MD11G1246800 // MD16G1238400 // MD11G1108300 // MD11G1108500 // MD15G1236600 // MD09G1287900 // MD03G1227500 // MD03G1227300
	GO:0034284	P	response to monosaccharide	20	451	310	39869	1.4e-09	7.3e-07	// MD13G1166800 // MD01G1050900 // MD04G1224400 // MD05G1345800 // MD02G1122400 // MD11G1108700 // MD16G1100500 // MD10G1231600 // MD13G1180400 // MD05G1254200 // MD00G1191600 // MD17G1229500 // MD11G1246800 // MD16G1238400 // MD11G1108300 // MD11G1108500 // MD15G1236600 // MD09G1287900 // MD03G1227500 // MD03G1227300
	GO:0019344	P	cysteine biosynthetic process	22	451	396	39869	2.9e-09	1.3e-06	// MD09G1178400 // MD13G1180400 // MD03G1042800 // MD05G1215200 // MD14G1202000 // MD15G1233400 // MD05G1345800 // MD00G1191600 // MD15G1215200 // MD00G1109700 // MD06G1012300 // MD00G1103100 // MD13G1131200 // MD12G1238600 // MD08G1220900 // MD08G1007200 // MD10G1238800 // MD01G1004300 // MD05G1115700 // MD16G1000400 // MD05G1000500 // MD15G1006300
	GO:0006534	P	cysteine metabolic process	22	451	397	39869	3e-09	1.3e-06	// MD09G1178400 // MD13G1180400 // MD03G1042800 // MD05G1215200 // MD14G1202000 // MD15G1233400 // MD05G1345800 // MD00G1191600 // MD15G1215200 // MD00G1109700 // MD06G1012300 // MD00G1103100 // MD13G1131200 // MD12G1238600 // MD08G1220900 // MD08G1007200 // MD10G1238800 // MD01G1004300 // MD05G1115700 // MD16G1000400 // MD05G1000500 // MD15G1006300
	GO:0009744	P	response to sucrose	23	451	439	39869	3.6e-09	1.4e-06	// MD01G1050900 // MD11G1108500 // MD13G1180400 // MD08G1236800 // MD05G1215200 // MD08G1007200 // MD02G1122400 // MD10G1231600 // MD11G1108700 // MD12G1165400 // MD02G1095600 // MD15G1106300 // MD00G1103100 // MD13G1174500 // MD16G1100500 // MD15G1428700 // MD11G1108300 // MD09G1133900 // MD15G1236600 // MD01G1053100 // MD09G1287900 // MD17G1229500 // MD05G1000500
	GO:0034285	P	response to disaccharide	23	451	443	39869	4.2e-09	1.5e-06	// MD01G1050900 // MD11G1108500 // MD13G1180400 // MD08G1236800 // MD05G1215200 // MD08G1007200 // MD02G1122400 // MD10G1231600 // MD11G1108700 // MD12G1165400 // MD02G1095600 // MD15G1106300 // MD00G1103100 // MD13G1174500 // MD16G1100500 // MD15G1428700 // MD11G1108300 // MD09G1133900 // MD15G1236600 // MD01G1053100 // MD09G1287900 // MD17G1229500 // MD05G1000500
	GO:0009743	P	response to carbohydrate	32	451	842	39869	6.4e-09	2.2e-06	// MD01G1050900 // MD11G1108500 // MD09G1133900 // MD13G1180400 // MD10G1231600 // MD03G1227300 // MD04G1224400 // MD15G1428700 // MD05G1345800 // MD02G1122400 // MD05G1254200 // MD00G1191600 // MD11G1108700 // MD12G1165400 // MD02G1095600 // MD15G1106300 // MD00G1103100 // MD13G1166800 // MD13G1174500 // MD16G1238400 // MD16G1100500 // MD08G1236800 // MD11G1246800 // MD11G1108300 // MD05G1215200…
	GO:0019725	P	cellular homeostasis	26	451	598	39869	1.4e-08	4.3e-06	// MD08G1023500 // MD03G1042800 // MD04G1224400 // MD05G1336200 // MD15G1251000 // MD14G1202000 // MD12G1055400 // MD05G1011900 // MD05G1345800 // MD17G1046700 // MD05G1309500 // MD11G1246800 // MD00G1109700 // MD02G1095600 // MD03G1227300 // MD09G1183200 // MD02G1255400 // MD10G1311700 // MD11G1079700 // MD12G1183000 // MD03G1227500 // MD12G1144800 // MD16G1129900 // MD17G1229500 // MD15G1020900…
	GO:1901605	P	alpha-amino acid metabolic process	34	451	1021	39869	4.8e-08	1.4e-05	// MD05G1173700 // MD09G1178400 // MD13G1180400 // MD10G1231600 // MD03G1042800 // MD05G1215200 // MD15G1012500 // MD14G1202000 // MD15G1233400 // MD15G1307200 // MD05G1345800 // MD00G1191600 // MD15G1215200 // MD13G1092200 // MD00G1109700 // MD06G1012300 // MD00G1103100 // MD16G1000400 // MD07G1264500 // MD12G1238600 // MD15G1006300 // MD08G1220900 // MD08G1007200 // MD10G1238800 // MD04G1047400…
	GO:0010218	P	response to far red light	14	451	185	39869	6.6e-08	1.8e-05	// MD13G1174500 // MD08G1007200 // MD09G1133900 // MD13G1180400 // MD15G1428700 // MD08G1236800 // MD11G1079700 // MD12G1165400 // MD05G1215200 // MD05G1000500 // MD04G1061200 // MD02G1095600 // MD00G1103100 // MD09G1252100
	GO:1901607	P	alpha-amino acid biosynthetic process	28	451	749	39869	8e-08	2.1e-05	// MD05G1173700 // MD09G1178400 // MD13G1180400 // MD03G1042800 // MD05G1215200 // MD14G1202000 // MD15G1233400 // MD05G1345800 // MD00G1191600 // MD15G1215200 // MD00G1109700 // MD06G1012300 // MD00G1103100 // MD13G1131200 // MD07G1264500 // MD12G1238600 // MD08G1220900 // MD08G1007200 // MD10G1238800 // MD04G1047400 // MD09G1287900 // MD01G1004300 // MD07G1204500 // MD05G1115700 // MD16G1000400…
	GO:0055082	P	cellular chemical homeostasis	19	451	373	39869	1.3e-07	3.1e-05	// MD12G1144800 // MD09G1183200 // MD05G1345800 // MD16G1129900 // MD03G1227300 // MD00G1109700 // MD02G1255400 // MD03G1042800 // MD04G1224400 // MD10G1311700 // MD17G1229500 // MD11G1079700 // MD11G1246800 // MD05G1336200 // MD14G1202000 // MD15G1006300 // MD02G1095600 // MD03G1227500 // MD12G1183000
	GO:0009750	P	response to fructose	16	451	264	39869	1.4e-07	3.3e-05	// MD13G1166800 // MD01G1050900 // MD16G1238400 // MD05G1345800 // MD02G1122400 // MD05G1254200 // MD16G1100500 // MD10G1231600 // MD13G1180400 // MD00G1191600 // MD17G1229500 // MD11G1246800 // MD15G1236600 // MD09G1287900 // MD03G1227500 // MD03G1227300
	GO:0030003	P	cellular cation homeostasis	18	451	341	39869	1.6e-07	3.7e-05	// MD12G1144800 // MD09G1183200 // MD05G1345800 // MD16G1129900 // MD03G1227300 // MD00G1109700 // MD02G1255400 // MD03G1042800 // MD10G1311700 // MD17G1229500 // MD11G1079700 // MD11G1246800 // MD05G1336200 // MD14G1202000 // MD15G1006300 // MD02G1095600 // MD03G1227500 // MD12G1183000
	GO:0006873	P	cellular ion homeostasis	18	451	351	39869	2.4e-07	5.3e-05	// MD12G1144800 // MD09G1183200 // MD05G1345800 // MD16G1129900 // MD03G1227300 // MD00G1109700 // MD02G1255400 // MD03G1042800 // MD10G1311700 // MD17G1229500 // MD11G1079700 // MD11G1246800 // MD05G1336200 // MD14G1202000 // MD15G1006300 // MD02G1095600 // MD03G1227500 // MD12G1183000
	GO:0009767	P	photosynthetic electron transport chain	12	451	148	39869	2.9e-07	6e-05	// MD11G1227900 // MD01G1004300 // MD03G1042800 // MD15G1428700 // MD07G1160900 // MD08G1236800 // MD16G1069900 // MD15G1006300 // MD07G1264500 // MD10G1051800 // MD09G1035000 // MD06G1225900
	GO:0009736	P	cytokinin-activated signaling pathway	11	451	122	39869	3.4e-07	6.7e-05	// MD15G1155800 // MD16G1084400 // MD16G1057000 // MD15G1346400 // MD14G1086100 // MD06G1182400 // MD14G1188400 // MD04G1212100 // MD13G1085200 // MD11G1293900 // MD08G1161200
	GO:0071368	P	cellular response to cytokinin stimulus	11	451	123	39869	3.6e-07	6.9e-05	// MD15G1155800 // MD16G1084400 // MD16G1057000 // MD15G1346400 // MD14G1086100 // MD06G1182400 // MD14G1188400 // MD04G1212100 // MD13G1085200 // MD11G1293900 // MD08G1161200
	GO:0072511	P	divalent inorganic cation transport	21	451	491	39869	4.4e-07	7.7e-05	// MD12G1144800 // MD09G1183200 // MD16G1238400 // MD05G1345800 // MD16G1129900 // MD09G1140300 // MD00G1109700 // MD09G1287900 // MD02G1255400 // MD03G1042800 // MD10G1311700 // MD17G1229500 // MD11G1079700 // MD15G1215200 // MD12G1183000 // MD05G1336200 // MD14G1202000 // MD08G1220900 // MD15G1006300 // MD02G1095600 // MD05G1115700
	GO:0070838	P	divalent metal ion transport	21	451	490	39869	4.2e-07	7.7e-05	// MD12G1144800 // MD09G1183200 // MD16G1238400 // MD05G1345800 // MD16G1129900 // MD09G1140300 // MD00G1109700 // MD09G1287900 // MD02G1255400 // MD03G1042800 // MD10G1311700 // MD17G1229500 // MD11G1079700 // MD15G1215200 // MD12G1183000 // MD05G1336200 // MD14G1202000 // MD08G1220900 // MD15G1006300 // MD02G1095600 // MD05G1115700
	GO:0055080	P	cation homeostasis	20	451	449	39869	4.5e-07	7.7e-05	// MD12G1144800 // MD09G1183200 // MD05G1345800 // MD16G1129900 // MD03G1227300 // MD00G1109700 // MD02G1255400 // MD03G1042800 // MD10G1311700 // MD17G1229500 // MD11G1079700 // MD11G1246800 // MD05G1336200 // MD08G1007200 // MD14G1202000 // MD14G1117100 // MD15G1006300 // MD02G1095600 // MD03G1227500 // MD12G1183000
	GO:0006812	P	cation transport	42	451	1577	39869	4.8e-07	8e-05	// MD14G1117100 // MD13G1180400 // MD03G1042800 // MD15G1428700 // MD13G1174500 // MD05G1215200 // MD08G1236800 // MD01G1108500 // MD08G1234400 // MD09G1133900 // MD05G1336200 // MD05G1345800 // MD15G1215200 // MD12G1165400 // MD03G1292900 // MD04G1212100 // MD00G1109700 // MD02G1095600 // MD00G1103100 // MD10G1051800 // MD09G1183200 // MD16G1238400 // MD02G1255400 // MD10G1311700 // MD11G1090600…
	GO:1901564	P	organonitrogen compound metabolic process	93	451	4914	39869	5.4e-07	8.6e-05	// MD01G1230300 // MD03G1053100 // MD12G1029300 // MD15G1215200 // MD13G1092200 // MD00G1109700 // MD16G1069900 // MD02G1255400 // MD07G1094700 // MD01G1121300 // MD09G1133900 // MD13G1220300 // MD03G1037700 // MD02G1175800 // MD05G1291900 // MD09G1050600 // MD09G1026900 // MD17G1015000 // MD05G1000500 // MD05G1173700 // MD06G1079100 // MD13G1180400 // MD00G1115700 // MD04G1231800 // MD15G1012500…
	GO:0043085	P	positive regulation of catalytic activity	14	451	228	39869	7.2e-07	0.00011	// MD05G1011900 // MD01G1121300 // MD11G1227900 // MD11G1289600 // MD08G1023500 // MD02G1107600 // MD15G1170900 // MD07G1296000 // MD15G1251000 // MD09G1039900 // MD15G1020900 // MD12G1144800 // MD09G1133900 // MD12G1029300
	GO:0044093	P	positive regulation of molecular function	14	451	230	39869	7.9e-07	0.00012	// MD05G1011900 // MD01G1121300 // MD11G1227900 // MD11G1289600 // MD08G1023500 // MD02G1107600 // MD15G1170900 // MD07G1296000 // MD15G1251000 // MD09G1039900 // MD15G1020900 // MD12G1144800 // MD09G1133900 // MD12G1029300
	GO:0009637	P	response to blue light	14	451	231	39869	8.3e-07	0.00012	// MD13G1174500 // MD10G1108800 // MD08G1007200 // MD09G1133900 // MD13G1180400 // MD08G1236800 // MD15G1428700 // MD11G1079700 // MD12G1165400 // MD05G1215200 // MD05G1000500 // MD02G1095600 // MD00G1103100 // MD09G1252100
	GO:0006739	P	NADP metabolic process	18	451	387	39869	9.4e-07	0.00013	// MD02G1175800 // MD01G1121300 // MD08G1007200 // MD12G1238600 // MD12G1029300 // MD13G1180400 // MD01G1004300 // MD03G1042800 // MD15G1170900 // MD07G1296000 // MD07G1160900 // MD15G1273300 // MD16G1069900 // MD09G1133900 // MD02G1095600 // MD03G1037700 // MD09G1035000 // MD06G1225900
	GO:0050801	P	ion homeostasis	20	451	480	39869	1.2e-06	0.00016	// MD12G1144800 // MD09G1183200 // MD05G1345800 // MD16G1129900 // MD03G1227300 // MD00G1109700 // MD02G1255400 // MD03G1042800 // MD10G1311700 // MD17G1229500 // MD11G1079700 // MD11G1246800 // MD05G1336200 // MD08G1007200 // MD14G1202000 // MD14G1117100 // MD15G1006300 // MD02G1095600 // MD03G1227500 // MD12G1183000
	GO:0019682	P	glyceraldehyde-3-phosphate metabolic process	25	451	717	39869	1.3e-06	0.00018	// MD09G1178400 // MD13G1180400 // MD17G1075600 // MD08G1007200 // MD12G1029300 // MD07G1296000 // MD13G1092200 // MD02G1095600 // MD06G1224500 // MD09G1035000 // MD13G1174500 // MD12G1238600 // MD15G1170900 // MD07G1160900 // MD09G1133900 // MD03G1037700 // MD06G1225900 // MD02G1175800 // MD01G1121300 // MD09G1287900 // MD00G1089100 // MD01G1004300 // MD05G1115700 // MD15G1273300 // MD16G1069900
	GO:0010155	P	regulation of proton transport	11	451	145	39869	1.7e-06	0.00021	// MD13G1174500 // MD08G1007200 // MD09G1133900 // MD13G1180400 // MD15G1428700 // MD08G1236800 // MD12G1165400 // MD05G1215200 // MD05G1000500 // MD02G1095600 // MD00G1103100
	GO:1901700	P	response to oxygen-containing compound	90	451	4834	39869	1.7e-06	0.00021	// MD14G1086100 // MD06G1046300 // MD02G1008400 // MD11G1108500 // MD10G1325900 // MD05G1309500 // MD12G1212000 // MD09G1271100 // MD13G1263800 // MD02G1255400 // MD07G1203700 // MD11G1108300 // MD09G1133900 // MD00G1122000 // MD01G1053100 // MD11G1191900 // MD04G1129500 // MD17G1229500 // MD05G1000500 // MD10G1192900 // MD01G1050900 // MD13G1042200 // MD07G1146900 // MD13G1180400 // MD03G1227300…
	GO:0006098	P	pentose-phosphate shunt	17	451	375	39869	2.6e-06	0.00031	// MD02G1175800 // MD01G1121300 // MD08G1007200 // MD12G1238600 // MD12G1029300 // MD13G1180400 // MD01G1004300 // MD15G1170900 // MD07G1296000 // MD07G1160900 // MD15G1273300 // MD16G1069900 // MD09G1133900 // MD02G1095600 // MD03G1037700 // MD09G1035000 // MD06G1225900
	GO:0051156	P	glucose 6-phosphate metabolic process	17	451	375	39869	2.6e-06	0.00031	// MD02G1175800 // MD01G1121300 // MD08G1007200 // MD12G1238600 // MD12G1029300 // MD13G1180400 // MD01G1004300 // MD15G1170900 // MD07G1296000 // MD07G1160900 // MD15G1273300 // MD16G1069900 // MD09G1133900 // MD02G1095600 // MD03G1037700 // MD09G1035000 // MD06G1225900
	GO:0042592	P	homeostatic process	29	451	958	39869	3e-06	0.00034	// MD08G1023500 // MD03G1042800 // MD04G1224400 // MD05G1336200 // MD15G1251000 // MD14G1202000 // MD12G1055400 // MD05G1011900 // MD05G1345800 // MD17G1046700 // MD05G1309500 // MD11G1246800 // MD16G1064400 // MD00G1109700 // MD02G1095600 // MD03G1227300 // MD09G1183200 // MD02G1255400 // MD10G1311700 // MD11G1079700 // MD12G1183000 // MD14G1117100 // MD08G1007200 // MD03G1227500 // MD12G1144800…
	GO:0009773	P	photosynthetic electron transport in photosystem I	9	451	97	39869	3.2e-06	0.00036	// MD01G1004300 // MD15G1428700 // MD08G1236800 // MD07G1160900 // MD07G1264500 // MD15G1006300 // MD03G1042800 // MD09G1035000 // MD06G1225900
	GO:0048878	P	chemical homeostasis	21	451	585	39869	6.2e-06	0.00068	// MD12G1144800 // MD09G1183200 // MD05G1345800 // MD16G1129900 // MD03G1227300 // MD00G1109700 // MD02G1255400 // MD03G1042800 // MD04G1224400 // MD10G1311700 // MD17G1229500 // MD11G1079700 // MD11G1246800 // MD05G1336200 // MD08G1007200 // MD14G1202000 // MD14G1117100 // MD15G1006300 // MD02G1095600 // MD03G1227500 // MD12G1183000
	GO:0055070	P	copper ion homeostasis	5	451	21	39869	9.3e-06	0.001	// MD11G1246800 // MD03G1227300 // MD08G1007200 // MD03G1227500 // MD02G1255400
	GO:0022900	P	electron transport chain	12	451	212	39869	9.7e-06	0.001	// MD11G1227900 // MD01G1004300 // MD03G1042800 // MD15G1428700 // MD07G1160900 // MD08G1236800 // MD16G1069900 // MD15G1006300 // MD07G1264500 // MD10G1051800 // MD09G1035000 // MD06G1225900
	GO:0030001	P	metal ion transport	32	451	1210	39869	1.3e-05	0.0014	// MD14G1117100 // MD03G1042800 // MD03G1292900 // MD01G1108500 // MD08G1234400 // MD05G1336200 // MD05G1345800 // MD15G1215200 // MD04G1212100 // MD00G1109700 // MD02G1095600 // MD10G1051800 // MD09G1183200 // MD16G1238400 // MD02G1255400 // MD10G1311700 // MD11G1090600 // MD15G1006300 // MD11G1079700 // MD08G1220900 // MD15G1062400 // MD05G1360600 // MD12G1144800 // MD09G1287900 // MD16G1129900…
	GO:0016053	P	organic acid biosynthetic process	51	451	2390	39869	1.5e-05	0.0015	// MD05G1173700 // MD09G1178400 // MD07G1146900 // MD13G1180400 // MD00G1191600 // MD03G1042800 // MD05G1215200 // MD15G1012500 // MD08G1211500 // MD00G1052000 // MD15G1233400 // MD12G1238600 // MD10G1170600 // MD15G1307200 // MD09G1253000 // MD06G1046300 // MD15G1215200 // MD05G1309500 // MD13G1092200 // MD10G1261000 // MD00G1109700 // MD06G1012300 // MD00G1103100 // MD09G1035000 // MD07G1264500…
	GO:0009735	P	response to cytokinin	12	451	222	39869	1.5e-05	0.0015	// MD15G1155800 // MD16G1084400 // MD16G1057000 // MD15G1346400 // MD14G1086100 // MD06G1182400 // MD14G1188400 // MD04G1212100 // MD04G1061200 // MD13G1085200 // MD11G1293900 // MD08G1161200
	GO:0042221	P	response to chemical	123	451	7610	39869	1.7e-05	0.0016	// MD14G1086100 // MD00G1191600 // MD02G1008400 // MD17G1221800 // MD11G1108500 // MD02G1013800 // MD11G1299000 // MD05G1309500 // MD16G1064400 // MD10G1108800 // MD12G1002500 // MD07G1107800 // MD05G1215200 // MD07G1203700 // MD11G1108300 // MD09G1133900 // MD00G1122000 // MD04G1194600 // MD01G1053100 // MD11G1191900 // MD04G1129500 // MD17G1229500 // MD14G1175000 // MD11G1191100 // MD11G1293900…
	GO:0042254	P	ribosome biogenesis	23	451	730	39869	1.7e-05	0.0016	// MD09G1178400 // MD05G1072400 // MD12G1262900 // MD17G1193600 // MD15G1083400 // MD03G1053100 // MD12G1165400 // MD11G1014400 // MD02G1095600 // MD00G1103100 // MD09G1035000 // MD17G1079700 // MD13G1174500 // MD15G1170900 // MD07G1094700 // MD07G1160900 // MD05G1291900 // MD11G1079700 // MD09G1050600 // MD01G1121300 // MD06G1224500 // MD09G1210700 // MD05G1000500
	GO:0010207	P	photosystem II assembly	14	451	308	39869	1.9e-05	0.0018	// MD17G1079700 // MD13G1174500 // MD05G1072400 // MD15G1083400 // MD08G1236800 // MD06G1068000 // MD15G1428700 // MD07G1160900 // MD01G1121300 // MD09G1035000 // MD05G1215200 // MD07G1264500 // MD14G1122900 // MD03G1161500
	GO:0006081	P	cellular aldehyde metabolic process	26	451	900	39869	2.1e-05	0.0019	// MD09G1178400 // MD13G1180400 // MD17G1075600 // MD08G1007200 // MD12G1029300 // MD07G1296000 // MD08G1196500 // MD13G1092200 // MD02G1095600 // MD06G1224500 // MD09G1035000 // MD13G1174500 // MD12G1238600 // MD15G1170900 // MD07G1160900 // MD09G1133900 // MD03G1037700 // MD06G1225900 // MD02G1175800 // MD01G1121300 // MD09G1287900 // MD00G1089100 // MD01G1004300 // MD05G1115700 // MD15G1273300…
	GO:1901566	P	organonitrogen compound biosynthetic process	65	451	3375	39869	2.2e-05	0.002	// MD01G1230300 // MD05G1173700 // MD09G1178400 // MD15G1426600 // MD13G1180400 // MD00G1115700 // MD03G1042800 // MD05G1215200 // MD04G1231800 // MD12G1262900 // MD00G1052000 // MD15G1233400 // MD10G1170600 // MD05G1345800 // MD17G1193600 // MD03G1254000 // MD00G1191600 // MD03G1053100 // MD15G1215200 // MD13G1092200 // MD11G1014400 // MD06G1012300 // MD00G1103100 // MD10G1051800 // MD09G1035000…
	GO:0022613	P	ribonucleoprotein complex biogenesis	23	451	753	39869	2.7e-05	0.0024	// MD09G1178400 // MD05G1072400 // MD12G1262900 // MD17G1193600 // MD15G1083400 // MD03G1053100 // MD12G1165400 // MD11G1014400 // MD02G1095600 // MD00G1103100 // MD09G1035000 // MD17G1079700 // MD13G1174500 // MD15G1170900 // MD07G1094700 // MD07G1160900 // MD05G1291900 // MD11G1079700 // MD09G1050600 // MD01G1121300 // MD06G1224500 // MD09G1210700 // MD05G1000500
	GO:0009812	P	flavonoid metabolic process	20	451	612	39869	3.7e-05	0.0032	// MD15G1155800 // MD15G1409700 // MD14G1126900 // MD16G1238400 // MD09G1287900 // MD05G1254200 // MD02G1255400 // MD03G1227300 // MD15G1409200 // MD10G1325900 // MD11G1246800 // MD07G1064400 // MD11G1272300 // MD04G1212100 // MD03G1227500 // MD15G1106300 // MD16G1090700 // MD03G1037700 // MD11G1293900 // MD01G1053100
	GO:0009628	P	response to abiotic stimulus	98	451	5856	39869	4.4e-05	0.0037	// MD06G1046300 // MD02G1008400 // MD11G1108500 // MD02G1013800 // MD09G1253000 // MD10G1325900 // MD15G1215200 // MD05G1309500 // MD13G1092200 // MD12G1165400 // MD16G1000400 // MD10G1108800 // MD12G1002500 // MD13G1263800 // MD02G1255400 // MD11G1079700 // MD16G1169000 // MD11G1108300 // MD09G1133900 // MD09G1287900 // MD01G1053100 // MD11G1191900 // MD04G1129500 // MD06G1011400 // MD17G1229500…
	GO:0009416	P	response to light stimulus	51	451	2501	39869	4.7e-05	0.0039	// MD09G1178400 // MD09G1133900 // MD13G1180400 // MD03G1088100 // MD15G1428700 // MD15G1012500 // MD05G1215200 // MD04G1061200 // MD10G1170600 // MD15G1307200 // MD09G1253000 // MD07G1228500 // MD02G1122400 // MD00G1191600 // MD17G1209800 // MD15G1215200 // MD13G1092200 // MD12G1165400 // MD02G1095600 // MD13G1085200 // MD15G1106300 // MD00G1103100 // MD16G1000400 // MD14G1085300 // MD01G1171100…
	GO:0035304	P	regulation of protein dephosphorylation	13	451	299	39869	5.9e-05	0.0048	// MD17G1079700 // MD10G1108800 // MD06G1215800 // MD01G1004300 // MD13G1042200 // MD15G1005800 // MD12G1054000 // MD07G1160900 // MD05G1309500 // MD04G1175500 // MD08G1220900 // MD15G1006300 // MD09G1035000
	GO:0035303	P	regulation of dephosphorylation	13	451	300	39869	6e-05	0.0049	// MD17G1079700 // MD10G1108800 // MD06G1215800 // MD01G1004300 // MD13G1042200 // MD15G1005800 // MD12G1054000 // MD07G1160900 // MD05G1309500 // MD04G1175500 // MD08G1220900 // MD15G1006300 // MD09G1035000
	GO:0010033	P	response to organic substance	92	451	5516	39869	9.1e-05	0.0072	// MD14G1086100 // MD06G1046300 // MD11G1108500 // MD11G1299000 // MD05G1309500 // MD16G1064400 // MD10G1108800 // MD12G1002500 // MD07G1107800 // MD07G1203700 // MD11G1108300 // MD09G1133900 // MD00G1122000 // MD04G1194600 // MD01G1053100 // MD04G1129500 // MD17G1229500 // MD14G1175000 // MD10G1192900 // MD11G1293900 // MD15G1155800 // MD01G1050900 // MD13G1042200 // MD07G1146900 // MD13G1180400…
	GO:0009314	P	response to radiation	52	451	2656	39869	0.00011	0.0084	// MD09G1178400 // MD09G1133900 // MD13G1180400 // MD03G1088100 // MD15G1428700 // MD15G1012500 // MD05G1215200 // MD04G1061200 // MD10G1170600 // MD15G1307200 // MD09G1253000 // MD07G1228500 // MD02G1122400 // MD00G1191600 // MD16G1064400 // MD17G1209800 // MD15G1215200 // MD13G1092200 // MD12G1165400 // MD02G1095600 // MD13G1085200 // MD15G1106300 // MD00G1103100 // MD16G1000400 // MD14G1085300…
	GO:0009725	P	response to hormone	60	451	3220	39869	0.00012	0.009	// MD15G1021500 // MD02G1192600 // MD07G1146900 // MD06G1215800 // MD14G1086100 // MD04G1224400 // MD13G1065600 // MD16G1136100 // MD15G1073900 // MD15G1012500 // MD00G1122000 // MD08G1211500 // MD14G1188400 // MD04G1061200 // MD12G1238600 // MD10G1170600 // MD16G1057000 // MD02G1122400 // MD02G1291200 // MD06G1046300 // MD11G1299000 // MD06G1182400 // MD05G1309500 // MD04G1212100 // MD13G1085200…
	GO:0006833	P	water transport	14	451	370	39869	0.00013	0.0095	// MD13G1166800 // MD14G1044500 // MD16G1238400 // MD05G1345800 // MD07G1228500 // MD05G1254200 // MD13G1180400 // MD03G1227500 // MD03G1227300 // MD00G1191600 // MD17G1229500 // MD11G1246800 // MD01G1108500 // MD04G1186600
	GO:0042044	P	fluid transport	14	451	370	39869	0.00013	0.0095	// MD13G1166800 // MD14G1044500 // MD16G1238400 // MD05G1345800 // MD07G1228500 // MD05G1254200 // MD13G1180400 // MD03G1227500 // MD03G1227300 // MD00G1191600 // MD17G1229500 // MD11G1246800 // MD01G1108500 // MD04G1186600
	GO:0044283	P	small molecule biosynthetic process	56	451	3028	39869	0.00024	0.018	// MD05G1173700 // MD09G1178400 // MD07G1146900 // MD13G1180400 // MD00G1191600 // MD03G1042800 // MD05G1215200 // MD15G1012500 // MD17G1221800 // MD08G1211500 // MD00G1052000 // MD15G1233400 // MD12G1238600 // MD01G1133700 // MD10G1170600 // MD15G1307200 // MD09G1253000 // MD11G1141200 // MD06G1046300 // MD15G1215200 // MD05G1309500 // MD13G1092200 // MD10G1261000 // MD15G1091000 // MD00G1109700…
	GO:0050790	P	regulation of catalytic activity	17	451	546	39869	0.00024	0.018	// MD05G1011900 // MD01G1121300 // MD15G1251000 // MD11G1227900 // MD11G1289600 // MD08G1023500 // MD12G1144800 // MD05G1327100 // MD15G1170900 // MD07G1296000 // MD08G1041500 // MD09G1039900 // MD15G1020900 // MD02G1107600 // MD11G1039600 // MD09G1133900 // MD12G1029300
	GO:0015992	P	proton transport	11	451	261	39869	0.00028	0.019	// MD13G1174500 // MD08G1007200 // MD09G1133900 // MD13G1180400 // MD15G1428700 // MD08G1236800 // MD12G1165400 // MD05G1215200 // MD05G1000500 // MD02G1095600 // MD00G1103100
	GO:0006818	P	hydrogen transport	11	451	261	39869	0.00028	0.019	// MD13G1174500 // MD08G1007200 // MD09G1133900 // MD13G1180400 // MD15G1428700 // MD08G1236800 // MD12G1165400 // MD05G1215200 // MD05G1000500 // MD02G1095600 // MD00G1103100
	GO:0006544	P	glycine metabolic process	8	451	140	39869	0.00028	0.019	// MD09G1178400 // MD15G1307200 // MD09G1287900 // MD12G1238600 // MD10G1231600 // MD05G1115700 // MD13G1092200 // MD05G1063200
	GO:0009813	P	flavonoid biosynthetic process	17	451	555	39869	0.00029	0.02	// MD15G1409700 // MD14G1126900 // MD16G1238400 // MD09G1287900 // MD05G1254200 // MD02G1255400 // MD03G1227300 // MD15G1409200 // MD10G1325900 // MD11G1246800 // MD07G1064400 // MD03G1227500 // MD15G1106300 // MD16G1090700 // MD03G1037700 // MD11G1272300 // MD01G1053100
	GO:0006662	P	glycerol ether metabolic process	6	451	76	39869	0.00032	0.021	// MD12G1055400 // MD05G1011900 // MD17G1046700 // MD08G1023500 // MD15G1251000 // MD15G1020900
	GO:0018904	P	ether metabolic process	6	451	76	39869	0.00032	0.021	// MD12G1055400 // MD05G1011900 // MD17G1046700 // MD08G1023500 // MD15G1251000 // MD15G1020900
	GO:0009644	P	response to high light intensity	16	451	509	39869	0.00033	0.022	// MD10G1110200 // MD13G1174500 // MD08G1007200 // MD07G1228500 // MD13G1180400 // MD08G1236800 // MD15G1428700 // MD17G1209800 // MD05G1283600 // MD12G1165400 // MD05G1215200 // MD05G1000500 // MD02G1095600 // MD00G1103100 // MD09G1133900 // MD09G1271100
	GO:0006811	P	ion transport	46	451	2395	39869	0.00041	0.026	// MD06G1079100 // MD14G1117100 // MD03G1004300 // MD13G1180400 // MD03G1042800 // MD15G1428700 // MD13G1174500 // MD17G1221800 // MD08G1236800 // MD01G1108500 // MD08G1234400 // MD09G1133900 // MD05G1215200 // MD05G1336200 // MD05G1345800 // MD15G1215200 // MD12G1165400 // MD03G1292900 // MD04G1212100 // MD00G1109700 // MD02G1095600 // MD00G1103100 // MD10G1051800 // MD09G1183200 // MD16G1238400…
	GO:0006364	P	rRNA processing	16	451	522	39869	0.00043	0.027	// MD17G1079700 // MD09G1178400 // MD05G1072400 // MD15G1083400 // MD00G1103100 // MD15G1170900 // MD13G1174500 // MD11G1079700 // MD07G1160900 // MD01G1121300 // MD12G1165400 // MD05G1000500 // MD11G1014400 // MD02G1095600 // MD06G1224500 // MD09G1035000
	GO:0016072	P	rRNA metabolic process	16	451	524	39869	0.00045	0.028	// MD17G1079700 // MD09G1178400 // MD05G1072400 // MD15G1083400 // MD00G1103100 // MD15G1170900 // MD13G1174500 // MD11G1079700 // MD07G1160900 // MD01G1121300 // MD12G1165400 // MD05G1000500 // MD11G1014400 // MD02G1095600 // MD06G1224500 // MD09G1035000
	GO:0042440	P	pigment metabolic process	21	451	826	39869	0.00066	0.04	// MD15G1155800 // MD15G1409700 // MD09G1178400 // MD15G1106300 // MD09G1287900 // MD00G1191600 // MD15G1170900 // MD15G1426600 // MD15G1409200 // MD10G1170600 // MD10G1325900 // MD13G1092200 // MD14G1126900 // MD11G1293900 // MD11G1241700 // MD04G1212100 // MD17G1229300 // MD16G1090700 // MD03G1037700 // MD09G1035000 // MD06G1225900
	GO:0046148	P	pigment biosynthetic process	18	451	653	39869	0.00065	0.04	// MD15G1155800 // MD15G1409700 // MD09G1178400 // MD11G1241700 // MD09G1287900 // MD00G1191600 // MD15G1170900 // MD15G1426600 // MD15G1409200 // MD10G1170600 // MD10G1325900 // MD13G1092200 // MD14G1126900 // MD15G1106300 // MD16G1090700 // MD03G1037700 // MD09G1035000 // MD06G1225900
	GO:0019288	P	isopentenyl diphosphate biosynthetic process, methylerythritol 4-phosphate pathway	15	451	491	39869	0.00067	0.04	// MD09G1178400 // MD09G1287900 // MD00G1089100 // MD05G1115700 // MD15G1170900 // MD02G1175800 // MD17G1075600 // MD15G1273300 // MD13G1092200 // MD09G1133900 // MD13G1174500 // MD02G1095600 // MD06G1224500 // MD09G1035000 // MD12G1238600
	GO:0006807	P	nitrogen compound metabolic process	153	451	10741	39869	0.00069	0.041	// MD01G1230300 // MD09G1133900 // MD14G1086100 // MD03G1183400 // MD04G1129100 // MD03G1053100 // MD12G1120300 // MD15G1409200 // MD09G1050600 // MD05G1309500 // MD13G1092200 // MD08G1039300 // MD00G1109700 // MD12G1165400 // MD16G1069900 // MD03G1091100 // MD14G1126900 // MD11G1047500 // MD13G1263800 // MD11G1241700 // MD02G1255400 // MD16G1076100 // MD07G1094700 // MD05G1291900 // MD05G1215200…
	GO:0006546	P	glycine catabolic process	7	451	126	39869	0.00078	0.045	// MD09G1178400 // MD15G1307200 // MD09G1287900 // MD12G1238600 // MD10G1231600 // MD05G1115700 // MD13G1092200
	GO:0009071	P	serine family amino acid catabolic process	7	451	126	39869	0.00078	0.045	// MD09G1178400 // MD15G1307200 // MD09G1287900 // MD12G1238600 // MD10G1231600 // MD05G1115700 // MD13G1092200
	GO:0006470	P	protein dephosphorylation	14	451	450	39869	0.00084	0.048	// MD17G1079700 // MD07G1160900 // MD10G1108800 // MD06G1215800 // MD01G1004300 // MD13G1042200 // MD15G1005800 // MD12G1054000 // MD07G1203700 // MD05G1309500 // MD04G1175500 // MD08G1220900 // MD15G1006300 // MD09G1035000
	GO:0006733	P	oxidoreduction coenzyme metabolic process	24	451	1029	39869	0.00091	0.049	// MD09G1178400 // MD03G1004300 // MD13G1180400 // MD03G1042800 // MD04G1186600 // MD08G1007200 // MD07G1228500 // MD12G1029300 // MD07G1296000 // MD13G1092200 // MD02G1095600 // MD09G1035000 // MD12G1238600 // MD15G1170900 // MD07G1160900 // MD09G1133900 // MD03G1037700 // MD06G1225900 // MD02G1175800 // MD01G1121300 // MD09G1287900 // MD01G1004300 // MD15G1273300 // MD16G1069900
	GO:0001101	P	response to acid chemical	52	451	2915	39869	0.00091	0.049	// MD15G1021500 // MD02G1192600 // MD07G1146900 // MD06G1215800 // MD14G1086100 // MD04G1224400 // MD13G1065600 // MD16G1136100 // MD15G1073900 // MD15G1012500 // MD00G1122000 // MD08G1211500 // MD11G1108500 // MD11G1166600 // MD12G1238600 // MD10G1170600 // MD07G1228500 // MD02G1122400 // MD02G1291200 // MD06G1046300 // MD10G1325900 // MD05G1309500 // MD10G1261000 // MD13G1263800 // MD09G1035000…
[truncated: 56 more rows]

## Sheet: S8
	Table S8. Pearsons's correlation analysis of cluster 3 DEGs that positively correlated to leaf N content
	C3 (Positive N correlation)
[truncated: 5 more rows]

## Sheet: S9
	Table S9. Functional annotation of DEGs in five expression clusters
[truncated: 2,319 more rows]

[truncated: 3 more sheets: S10, S11, S12]
